# Supplementary material for: A computational screen for alternative genetic codes in over 250,000 genomes
Source: eLife. 2021 Nov 9;10:e71402. doi: 10.7554/eLife.71402 (PMC8629427; doi:10.7554/eLife.71402)
Supplement: Figure 2—source data 1. [file elife-71402-fig2-data1.xls]

## Sheet: 20200512_species_list
NCBI species-level taxid	Genome accession	Genome species name	Codetta CUG inference	CUG # aligned Pfam consensus columns	total # aligned Pfam consensus columns	Figure 2a phylogenetic grouping	Shen et al (2018): major clade	Major clade inferred from genus (if not in Shen et al dataset)	NCBI family	NCBI genus	Comments
1196395	GCA_003706045.1	Peterozyma toletana	A	2742	756967	CUG-Ala	CUG-Ala		Debaryomycetaceae	Peterozyma
1337056	GCA_003706035.1	Peterozyma xylosa	A	2694	738099	CUG-Ala	CUG-Ala		Debaryomycetaceae	Peterozyma
36025	GCA_003706265.1	Nakazawaea holstii	A	3571	716646	CUG-Ala	CUG-Ala		Pichiaceae	Nakazawaea
1538182	GCA_001599355.1	Nakazawaea peltata	A	10788	709290	CUG-Ala	CUG-Ala		Pichiaceae	Nakazawaea
1538186	GCA_003243035.1	Nakazawaea wickerhamii	A	4829	668056	CUG-Ala		CUG-Ala	Pichiaceae	Nakazawaea
4918	GCA_001661245.1	Pachysolen tannophilus NRRL Y-2460	A	1392	581099	CUG-Ala	CUG-Ala		Saccharomycetaceae	Pachysolen
36038	GCA_003706655.2	Barnettozyma californica	L	10289	756922	CUG-Leu1	Phaffomycetaceae		Phaffomycetaceae	Barnettozyma
36040	GCA_003707865.1	Barnettozyma pratensis	L	4186	729013	CUG-Leu1	Phaffomycetaceae		Phaffomycetaceae	Barnettozyma
53645	GCA_003706705.2	Barnettozyma populi	L	13014	746985	CUG-Leu1	Phaffomycetaceae		Phaffomycetaceae	Barnettozyma
96499	GCA_003706665.1	Barnettozyma hawaiiensis	L	13722	707896	CUG-Leu1	Phaffomycetaceae		Phaffomycetaceae	Barnettozyma
1337058	GCA_003707885.1	Barnettozyma salicaria	L	8801	720786	CUG-Leu1	Phaffomycetaceae		Phaffomycetaceae	Barnettozyma
49329	GCA_003706615.2	[Candida] montana	L	3586	689820	CUG-Leu1	Phaffomycetaceae		Phaffomycetaceae	Barnettozyma
4903	GCA_001661405.1	Cyberlindnera jadinii NRRL Y-1542	L	15990	768492	CUG-Leu1	Phaffomycetaceae		Phaffomycetaceae	Cyberlindnera
36016	GCA_003708795.2	Cyberlindnera americana	L	9212	764968	CUG-Leu1	Phaffomycetaceae		Phaffomycetaceae	Cyberlindnera
36022	GCA_001599195.1	Cyberlindnera fabianii	L	5597	762747	CUG-Leu1	Phaffomycetaceae		Phaffomycetaceae	Cyberlindnera
36028	GCA_003706915.2	Cyberlindnera petersonii	L	10860	748649	CUG-Leu1	Phaffomycetaceae		Phaffomycetaceae	Cyberlindnera
65811	GCA_003708355.2	Cyberlindnera maclurae	L	16194	728875	CUG-Leu1	Phaffomycetaceae		Phaffomycetaceae	Cyberlindnera
131113	GCA_003707745.1	Cyberlindnera misumaiensis	L	14688	742707	CUG-Leu1	Phaffomycetaceae		Phaffomycetaceae	Cyberlindnera
907340	GCA_003709245.2	Cyberlindnera saturnus	L	9956	795683	CUG-Leu1	Phaffomycetaceae		Phaffomycetaceae	Cyberlindnera
907738	GCA_003708225.2	Cyberlindnera suaveolens	L	9089	755210	CUG-Leu1	Phaffomycetaceae		Phaffomycetaceae	Cyberlindnera
1004253	GCA_003706445.2	Cyberlindnera mrakii	L	10159	765218	CUG-Leu1	Phaffomycetaceae		Phaffomycetaceae	Cyberlindnera
1667614	GCA_003708285.1	Cyberlindnera xylosilytica	L	10637	831420	CUG-Leu1	Phaffomycetaceae		Phaffomycetaceae	Cyberlindnera
51918	GCA_900465365.1	[Candida] vartiovaarae	L	11822	673161	CUG-Leu1	Phaffomycetaceae		Phaffomycetaceae	Cyberlindnera
130814	GCA_003708295.2	[Candida] mycetangii	L	14861	768767	CUG-Leu1	Phaffomycetaceae		Phaffomycetaceae	Cyberlindnera
54045	GCA_003707195.1	Phaffomyces antillensis	L	1750	635527	CUG-Leu1	Phaffomycetaceae		Phaffomycetaceae	Phaffomyces
54046	GCA_003707215.1	Phaffomyces thermotolerans	L	1816	613919	CUG-Leu1	Phaffomycetaceae		Phaffomycetaceae	Phaffomyces
54194	GCA_003707165.1	Phaffomyces opuntiae	L	1353	639984	CUG-Leu1	Phaffomycetaceae		Phaffomycetaceae	Phaffomyces
115786	GCA_003708145.2	[Candida] orba	L	1871	622603	CUG-Leu1	Phaffomycetaceae		Phaffomycetaceae	Phaffomyces
53643	GCA_003708085.1	Starmera amethionina	L	1943	608272	CUG-Leu1	Phaffomycetaceae		Phaffomycetaceae	Starmera
53646	GCA_003705275.1	Starmera quercuum	L	10278	760357	CUG-Leu1	Phaffomycetaceae		Phaffomycetaceae	Starmera
56415	GCA_003707265.1	[Candida] stellimalicola	L	22473	666303	CUG-Leu1	Phaffomycetaceae		Phaffomycetaceae	Starmera
4927	GCA_001661255.1	Wickerhamomyces anomalus NRRL Y-366-8	L	2065	771087	CUG-Leu1	Phaffomycetaceae		Phaffomycetaceae	Wickerhamomyces
53647	GCA_003707945.2	Wickerhamomyces bovis	L	8745	733799	CUG-Leu1	Phaffomycetaceae		Phaffomycetaceae	Wickerhamomyces
1041607	GCA_000313485.1	Wickerhamomyces ciferrii	L	942	707082	CUG-Leu1	Phaffomycetaceae		Phaffomycetaceae	Wickerhamomyces
1041608	GCA_003706765.2	Wickerhamomyces hampshirensis	L	5084	754799	CUG-Leu1	Phaffomycetaceae		Phaffomycetaceae	Wickerhamomyces
1156965	GCA_003707015.2	Wickerhamomyces canadensis	L	8411	753642	CUG-Leu1	Phaffomycetaceae		Phaffomycetaceae	Wickerhamomyces
1337057	GCA_003707985.2	Wickerhamomyces alni	L	8984	758851	CUG-Leu1	Phaffomycetaceae		Phaffomycetaceae	Wickerhamomyces
135456	GCA_003706755.2	[Candida] ponderosae	L	3532	729102	CUG-Leu1	Phaffomycetaceae		Phaffomycetaceae	Wickerhamomyces
2508582	GCA_003706815.2	Wickerhamomyces sp. NRRL YB-2243	L	6811	735888	CUG-Leu1	Phaffomycetaceae		Phaffomycetaceae	Wickerhamomyces
33169	GCA_000091025.4	Eremothecium gossypii ATCC 10895	L	24348	680637	CUG-Leu1	Saccharomycetaceae		Saccharomycetaceae	Eremothecium
33173	GCA_000710315.1	Eremothecium coryli CBS 5749	L	6400	654163	CUG-Leu1	Saccharomycetaceae		Saccharomycetaceae	Eremothecium
45285	GCA_000235365.1	Eremothecium cymbalariae DBVPG#7215	L	6786	653360	CUG-Leu1	Saccharomycetaceae		Saccharomycetaceae	Eremothecium
45286	GCA_001548555.1	Eremothecium sinecaudum	L	6557	622563	CUG-Leu1	Saccharomycetaceae		Saccharomycetaceae	Eremothecium
27293	GCA_002214935.1	Kazachstania servazzii	L	3427	658229	CUG-Leu1		Saccharomycetaceae	Saccharomycetaceae	Kazachstania
27294	GCA_003708525.2	Kazachstania unispora	L	1554	642263	CUG-Leu1	Saccharomycetaceae		Saccharomycetaceae	Kazachstania
36916	GCA_003708445.2	Kazachstania transvaalensis	L	3201	618279	CUG-Leu1	Saccharomycetaceae		Saccharomycetaceae	Kazachstania
56413	GCA_003708425.2	Kazachstania rosinii	L	14797	732381	CUG-Leu1	Saccharomycetaceae		Saccharomycetaceae	Kazachstania
71246	GCA_003708455.1	Kazachstania viticola	L	3437	699856	CUG-Leu1	Saccharomycetaceae		Saccharomycetaceae	Kazachstania
74404	GCA_003708925.2	Kazachstania martiniae	L	4126	708220	CUG-Leu1	Saccharomycetaceae		Saccharomycetaceae	Kazachstania
271218	GCA_003708495.1	Kazachstania aerobia	L	2478	651415	CUG-Leu1	Saccharomycetaceae		Saccharomycetaceae	Kazachstania
382647	GCA_003708905.2	Kazachstania siamensis	L	1792	654076	CUG-Leu1	Saccharomycetaceae		Saccharomycetaceae	Kazachstania
432096	GCA_000304475.1	Kazachstania africana CBS 2517	L	5673	717329	CUG-Leu1	Saccharomycetaceae		Saccharomycetaceae	Kazachstania
432099	GCA_003709265.1	Kazachstania yakushimaensis	L	1720	601663	CUG-Leu1	Saccharomycetaceae		Saccharomycetaceae	Kazachstania
432100	GCA_003708545.1	Kazachstania turicensis	L	3184	680435	CUG-Leu1	Saccharomycetaceae		Saccharomycetaceae	Kazachstania	UAG stop codon is inferred to code for tryptophan due to 5 aligned Pfam consensus columns, probably due to Pfam domain alignment to pseudogenes.
488016	GCA_003708465.1	Kazachstania kunashirensis	L	3003	659336	CUG-Leu1	Saccharomycetaceae		Saccharomycetaceae	Kazachstania
588726	GCA_000348985.1	Kazachstania naganishii CBS 8797	L	19265	732939	CUG-Leu1	Saccharomycetaceae		Saccharomycetaceae	Kazachstania
655095	GCA_003708865.1	Kazachstania taianensis	L	18367	722378	CUG-Leu1	Saccharomycetaceae		Saccharomycetaceae	Kazachstania
935788	GCA_003708845.2	Kazachstania intestinalis	L	9653	695720	CUG-Leu1	Saccharomycetaceae		Saccharomycetaceae	Kazachstania
1006466	GCA_003708535.2	Kazachstania bromeliacearum	L	2892	690375	CUG-Leu1	Saccharomycetaceae		Saccharomycetaceae	Kazachstania
1089532	GCA_003708835.2	Kazachstania solicola	L	4565	707592	CUG-Leu1	Saccharomycetaceae		Saccharomycetaceae	Kazachstania
1089533	GCA_003708825.2	Kazachstania spencerorum	L	3397	750210	CUG-Leu1	Saccharomycetaceae		Saccharomycetaceae	Kazachstania
1789683	GCA_900180425.1	Kazachstania saulgeensis	L	2670	633717	CUG-Leu1		Saccharomycetaceae	Saccharomycetaceae	Kazachstania
36907	GCA_009394695.1	Kazachstania telluris	L	3419	635883	CUG-Leu1		Saccharomycetaceae	Saccharomycetaceae	Kazachstania
4911	GCA_001417885.1	Kluyveromyces marxianus DMKU3-1042	L	3254	705535	CUG-Leu1	Saccharomycetaceae		Saccharomycetaceae	Kluyveromyces
28985	GCA_000002515.1	Kluyveromyces lactis	L	3636	713940	CUG-Leu1	Saccharomycetaceae		Saccharomycetaceae	Kluyveromyces
33165	GCA_003707555.1	Kluyveromyces aestuarii	L	4775	687298	CUG-Leu1	Saccharomycetaceae		Saccharomycetaceae	Kluyveromyces
51656	GCA_003705805.2	Kluyveromyces dobzhanskii	L	6834	707829	CUG-Leu1	Saccharomycetaceae		Saccharomycetaceae	Kluyveromyces
51658	GCA_000179415.1	Kluyveromyces wickerhamii UCD 54-210	L	7175	698206	CUG-Leu1		Saccharomycetaceae	Saccharomycetaceae	Kluyveromyces
74104	GCA_003670155.1	Kluyveromyces nonfermentans	L	4540	644356	CUG-Leu1		Saccharomycetaceae	Saccharomycetaceae	Kluyveromyces
2613904	GCA_008973615.1	Kluyveromyces sp. TMB-2019a	L	15558	683461	CUG-Leu1		Saccharomycetaceae	Saccharomycetaceae	Kluyveromyces
4914	GCA_000167115.1	Lachancea waltii NCYC 2644	L	14742	750134	CUG-Leu1	Saccharomycetaceae		Saccharomycetaceae	Lachancea
4934	GCA_000149225.1	Lachancea kluyveri NRRL Y-12651	L	12726	774596	CUG-Leu1	Saccharomycetaceae		Saccharomycetaceae	Lachancea
4955	GCA_900074765.1	Lachancea fermentati	L	10828	754899	CUG-Leu1	Saccharomycetaceae		Saccharomycetaceae	Lachancea
300276	GCA_900074715.1	Lachancea meyersii CBS 8951	L	17013	710741	CUG-Leu1	Saccharomycetaceae		Saccharomycetaceae	Lachancea
381046	GCA_000142805.1	Lachancea thermotolerans CBS 6340	L	18176	743408	CUG-Leu1	Saccharomycetaceae		Saccharomycetaceae	Lachancea
679534	GCA_900074755.1	Lachancea nothofagi CBS 11611	L	12851	731502	CUG-Leu1	Saccharomycetaceae		Saccharomycetaceae	Lachancea
1072105	GCA_900074725.1	Lachancea dasiensis CBS 10888	L	14856	720168	CUG-Leu1	Saccharomycetaceae		Saccharomycetaceae	Lachancea
1230905	GCA_900074745.1	Lachancea mirantina	L	12492	711906	CUG-Leu1	Saccharomycetaceae		Saccharomycetaceae	Lachancea
1245769	GCA_000938715.1	Lachancea lanzarotensis	L	14386	714745	CUG-Leu1	Saccharomycetaceae		Saccharomycetaceae	Lachancea
1654605	GCA_002900925.1	Lachancea quebecensis	L	17246	728793	CUG-Leu1	Saccharomycetaceae		Saccharomycetaceae	Lachancea
1230904	GCA_900074735.1	Lachancea sp. CBS 6924	L	15411	715899	CUG-Leu1	Saccharomycetaceae		Saccharomycetaceae	Lachancea
51657	GCA_001039675.1	Nakaseomyces delphensis CBS 2170	L	13907	694930	CUG-Leu1	Saccharomycetaceae		Saccharomycetaceae	Nakaseomyces
51660	GCA_001046975.1	Nakaseomyces bacillisporus CBS 7720	L	5952	669961	CUG-Leu1	Saccharomycetaceae		Saccharomycetaceae	Nakaseomyces
5478	GCA_000002545.2	[Candida] glabrata	L	11546	722248	CUG-Leu1	Saccharomycetaceae		Saccharomycetaceae	Nakaseomyces
51914	GCA_001046935.1	[Candida] castellii CBS 4332	L	9605	662983	CUG-Leu1	Saccharomycetaceae		Saccharomycetaceae	Nakaseomyces
273131	GCA_001077315.1	[Candida] bracarensis CBS 10154	L	8938	688598	CUG-Leu1	Saccharomycetaceae		Saccharomycetaceae	Nakaseomyces
418086	GCA_001046915.1	[Candida] nivariensis CBS 9983	L	10344	696651	CUG-Leu1	Saccharomycetaceae		Saccharomycetaceae	Nakaseomyces
27288	GCA_000237345.1	Naumovozyma castellii CBS 4309	L	4856	752037	CUG-Leu1	Saccharomycetaceae		Saccharomycetaceae	Naumovozyma
27289	GCA_000227115.2	Naumovozyma dairenensis CBS 421	L	2443	699281	CUG-Leu1	Saccharomycetaceae		Saccharomycetaceae	Naumovozyma
1387711	GCA_013180125.1	Saccharomyces bayanus NBRC1948	L	11540	770959	CUG-Leu1		Saccharomycetaceae	Saccharomycetaceae	Saccharomyces
4932	GCA_000146045.2	Saccharomyces cerevisiae S288C	L	9831	851378	CUG-Leu1	Saccharomycetaceae		Saccharomycetaceae	Saccharomyces
27291	GCA_002079055.1	Saccharomyces paradoxus	L	10241	850935	CUG-Leu1	Saccharomycetaceae		Saccharomycetaceae	Saccharomyces
27292	GCA_011022315.1	Saccharomyces pastorianus Weihenstephan 34/70	L	21188	1613480	CUG-Leu1	Saccharomycetaceae		Saccharomycetaceae	Saccharomyces
114524	GCA_003327635.1	Saccharomyces kudriavzevii	L	12475	841783	CUG-Leu1	Saccharomycetaceae		Saccharomycetaceae	Saccharomyces
114525	GCA_000166975.1	Saccharomyces mikatae IFO 1815	L	9668	826364	CUG-Leu1	Saccharomycetaceae		Saccharomycetaceae	Saccharomyces
230603	GCA_002242645.1	Saccharomyces uvarum	L	12548	814797	CUG-Leu1	Saccharomycetaceae		Saccharomycetaceae	Saccharomyces
332112	GCA_000326105.1	Saccharomyces cerevisiae x Saccharomyces kudriavzevii VIN7	L	21685	1651878	CUG-Leu1		Saccharomycetaceae	Saccharomycetaceae	Saccharomyces
706196	GCA_000292725.1	Saccharomyces arboricola H-6	L	10486	806384	CUG-Leu1	Saccharomycetaceae		Saccharomycetaceae	Saccharomyces
1080349	GCA_001298625.1	Saccharomyces eubayanus	L	12177	820171	CUG-Leu1	Saccharomycetaceae		Saccharomycetaceae	Saccharomyces
1470621	GCA_009666275.1	Saccharomyces cerevisiae x Saccharomyces eubayanus x Saccharomyces uvarum	L	23573	1748849	CUG-Leu1		Saccharomycetaceae	Saccharomycetaceae	Saccharomyces
1684324	GCA_009666655.1	Saccharomyces cerevisiae x Saccharomyces eubayanus	L	20679	1580927	CUG-Leu1		Saccharomycetaceae	Saccharomycetaceae	Saccharomyces
1431717	GCA_013180725.1	Saccharomyces cerevisiae x Saccharomyces kudriavzevii x Saccharomyces uvarum	L	26585	1946193	CUG-Leu1		Saccharomycetaceae	Saccharomycetaceae	Saccharomyces	UGA stop codon is inferred to code for tryptophan due to 8 aligned Pfam consensus columns, probably due to Pfam domain alignment to pseudogenes.
489137	GCA_013180185.1	Saccharomyces cerevisiae x Saccharomyces uvarum	L	21969	1638750	CUG-Leu1		Saccharomycetaceae	Saccharomycetaceae	Saccharomyces	UGA stop codon is inferred to code for tryptophan due to 4 aligned Pfam consensus columns, probably due to Pfam domain alignment to pseudogenes.
1911678	GCA_009666385.1	Saccharomyces eubayanus x Saccharomyces uvarum	L	12749	835626	CUG-Leu1		Saccharomycetaceae	Saccharomycetaceae	Saccharomyces
1987369	GCA_900290405.1	Saccharomyces jurei	L	9825	831945	CUG-Leu1		Saccharomycetaceae	Saccharomycetaceae	Saccharomyces
2528332	GCA_009666465.1	Saccharomyces cerevisiae x Saccharomyces kudriavzevii x Saccharomyces eubayanus	L	23977	1807881	CUG-Leu1		Saccharomycetaceae	Saccharomycetaceae	Saccharomyces	UGA stop codon is inferred to code for tryptophan due to 6 aligned Pfam consensus columns, probably due to Pfam domain alignment to pseudogenes.
2528333	GCA_009667055.1	Saccharomyces cerevisiae x Saccharomyces eubayanus x Saccharomyces kudriavzevii x Saccharomyces uvarum	L	29555	2144682	CUG-Leu1		Saccharomycetaceae	Saccharomycetaceae	Saccharomyces	UGA stop codon is inferred to code for tryptophan due to 14 aligned Pfam consensus columns, probably due to Pfam domain alignment to pseudogenes.
252598	GCA_001413975.1	Saccharomyces sp. 'boulardii'	L	9936	855900	CUG-Leu1		Saccharomycetaceae	Saccharomycetaceae	Saccharomyces
1337648	GCA_002375215.1	Saccharomyces sp. M14	L	21192	1619594	CUG-Leu1		Saccharomycetaceae	Saccharomycetaceae	Saccharomyces
113606	GCA_003705975.1	Tetrapisispora iriomotensis	L	3440	673911	CUG-Leu1	Saccharomycetaceae		Saccharomycetaceae	Tetrapisispora
113608	GCA_000236905.1	Tetrapisispora phaffii CBS 4417	L	4311	657209	CUG-Leu1	Saccharomycetaceae		Saccharomycetaceae	Tetrapisispora
279732	GCA_003705985.1	Tetrapisispora namnaoensis	L	3583	630638	CUG-Leu1		Saccharomycetaceae	Saccharomycetaceae	Tetrapisispora
300277	GCA_003707605.1	Tetrapisispora fleetii	L	3161	623060	CUG-Leu1	Saccharomycetaceae		Saccharomycetaceae	Tetrapisispora
1071379	GCA_000315915.1	Tetrapisispora blattae CBS 6284	L	2017	618520	CUG-Leu1	Saccharomycetaceae		Saccharomycetaceae	Tetrapisispora
4950	GCA_000243375.1	Torulaspora delbrueckii	L	11298	724456	CUG-Leu1	Saccharomycetaceae		Saccharomycetaceae	Torulaspora
35629	GCA_012851205.1	Torulaspora pretoriensis	L	17253	726032	CUG-Leu1	Saccharomycetaceae		Saccharomycetaceae	Torulaspora
53488	GCA_003705175.2	Torulaspora franciscae	L	19760	809653	CUG-Leu1	Saccharomycetaceae		Saccharomycetaceae	Torulaspora
200334	GCA_003708055.2	Torulaspora maleeae	L	18392	721156	CUG-Leu1	Saccharomycetaceae		Saccharomycetaceae	Torulaspora
1136883	GCA_900186055.1	Torulaspora microellipsoides	L	8330	733648	CUG-Leu1	Saccharomycetaceae		Saccharomycetaceae	Torulaspora
566037	GCA_000412225.2	Saccharomycetaceae sp. 'Ashbya aceri'	L	22614	683571	CUG-Leu1	Saccharomycetaceae		Saccharomycetaceae	unclassified Saccharomycetaceae
36033	GCA_000150035.1	Vanderwaltozyma polyspora DSM 70294	L	3244	701575	CUG-Leu1	Saccharomycetaceae		Saccharomycetaceae	Vanderwaltozyma
58632	GCA_003707995.1	Yueomyces sinensis	L	1406	552903	CUG-Leu1	Saccharomycetaceae		Saccharomycetaceae	Yueomyces
4954	GCA_000442885.1	Zygosaccharomyces bailii CLIB 213	L	12632	726096	CUG-Leu1	Saccharomycetaceae		Saccharomycetaceae	Zygosaccharomyces
4956	GCA_000026365.1	Zygosaccharomyces rouxii	L	6277	709587	CUG-Leu1	Saccharomycetaceae		Saccharomycetaceae	Zygosaccharomyces
4957	GCA_003707595.1	Zygosaccharomyces bisporus	L	15056	731532	CUG-Leu1	Saccharomycetaceae		Saccharomycetaceae	Zygosaccharomyces
42258	GCA_007556495.1	Zygosaccharomyces mellis	L	14355	1366850	CUG-Leu1		Saccharomycetaceae	Saccharomycetaceae	Zygosaccharomyces
166050	GCA_003705955.1	Zygosaccharomyces kombuchaensis	L	15828	734321	CUG-Leu1	Saccharomycetaceae		Saccharomycetaceae	Zygosaccharomyces
1365886	GCA_001984395.2	Zygosaccharomyces parabailii	L	25041	1440852	CUG-Leu1		Saccharomycetaceae	Saccharomycetaceae	Zygosaccharomyces
1365887	GCA_900408955.1	Zygosaccharomyces pseudobailii	L	24492	1418177	CUG-Leu1		Saccharomycetaceae	Saccharomycetaceae	Zygosaccharomyces
1461763	GCA_900465325.1	Zygosaccharomyces sapae	L	17190	1659990	CUG-Leu1		Saccharomycetaceae	Saccharomycetaceae	Zygosaccharomyces
42260	GCA_003671565.1	Zygotorulaspora mrakii	L	10584	718087	CUG-Leu1	Saccharomycetaceae		Saccharomycetaceae	Zygotorulaspora
48255	GCA_003671575.2	Zygotorulaspora florentina	L	11524	753514	CUG-Leu1	Saccharomycetaceae		Saccharomycetaceae	Zygotorulaspora
64417	GCA_003707735.1	[Candida] freyschussii	L	8538	753431	CUG-Leu1	Phaffomycetaceae		Saccharomycetales incertae sedis	Candida
29833	GCA_001747055.1	Hanseniaspora uvarum	L	1242	371315	CUG-Leu1	Saccharomycodaceae		Saccharomycodaceae	Hanseniaspora
53685	GCA_001664025.1	Hanseniaspora valbyensis NRRL Y-1626	L	603	379323	CUG-Leu1	Saccharomycodaceae		Saccharomycodaceae	Hanseniaspora	CGC codon is uninferred, probably due to low number of aligned Pfam consensus columns (19)
56406	GCA_004919775.1	Hanseniaspora guilliermondii	L	1877	382748	CUG-Leu1	Saccharomycodaceae		Saccharomycodaceae	Hanseniaspora
56407	GCA_004919885.1	Hanseniaspora occidentalis var. citrica	L	2714	567461	CUG-Leu1		Saccharomycodaceae	Saccharomycodaceae	Hanseniaspora
56408	GCA_001747045.1	Hanseniaspora osmophila	L	3552	539371	CUG-Leu1	Saccharomycodaceae		Saccharomycodaceae	Hanseniaspora
56409	GCA_000585475.3	Hanseniaspora vineae	L	4097	545520	CUG-Leu1	Saccharomycodaceae		Saccharomycodaceae	Hanseniaspora
211096	GCA_001749795.1	Hanseniaspora opuntiae	L	4404	386002	CUG-Leu1		Saccharomycodaceae	Saccharomycodaceae	Hanseniaspora
211097	GCA_004919825.1	Hanseniaspora meyeri	L	8660	504923	CUG-Leu1		Saccharomycodaceae	Saccharomycodaceae	Hanseniaspora
211098	GCA_004919765.1	Hanseniaspora lachancei	L	6157	437098	CUG-Leu1		Saccharomycodaceae	Saccharomycodaceae	Hanseniaspora
211099	GCA_003706385.1	Hanseniaspora clermontiae	L	6253	430524	CUG-Leu1	Saccharomycodaceae		Saccharomycodaceae	Hanseniaspora
332229	GCA_003708335.1	Hanseniaspora pseudoguilliermondii	L	4697	411695	CUG-Leu1	Saccharomycodaceae		Saccharomycodaceae	Hanseniaspora
572238	GCA_003708365.1	Hanseniaspora sp. 'singularis'	L	235	343628	CUG-Leu1	Saccharomycodaceae		Saccharomycodaceae	Hanseniaspora
689838	GCA_004919915.1	Hanseniaspora thailandica	L	1554	438025	CUG-Leu1		Saccharomycodaceae	Saccharomycodaceae	Hanseniaspora	CGC and CGG codons are uninferred, probably due to low number of aligned Pfam consensus columns (18 and 16, respectively)
1235602	GCA_003708765.1	Hanseniaspora sp. 'hatyaiensis'	L	6177	421994	CUG-Leu1	Saccharomycodaceae		Saccharomycodaceae	Hanseniaspora
1443074	GCA_004919845.1	Hanseniaspora nectarophila	L	2400	460649	CUG-Leu1		Saccharomycodaceae	Saccharomycodaceae	Hanseniaspora	CGC codon is uninferred, probably due to low number of aligned Pfam consensus columns (4)
1926583	GCA_004919785.1	Hanseniaspora jakobsenii	L	2619	519227	CUG-Leu1		Saccharomycodaceae	Saccharomycodaceae	Hanseniaspora
2094518	GCA_003020785.1	Hanseniaspora gamundiae	L	4012	534022	CUG-Leu1		Saccharomycodaceae	Saccharomycodaceae	Hanseniaspora
36035	GCA_900491785.1	Saccharomycodes ludwigii	L	1568	579199	CUG-Leu1		Saccharomycodaceae	Saccharomycodaceae	Saccharomycodes
4922	GCA_001708105.1	Komagataella pastoris	L	12073	682013	CUG-Leu2	Pichiaceae		Phaffomycetaceae	Komagataella
169507	GCA_003671595.2	Komagataella pseudopastoris	L	13248	672540	CUG-Leu2	Pichiaceae		Phaffomycetaceae	Komagataella
460519	GCA_000027005.1	Komagataella phaffii GS115	L	11635	674441	CUG-Leu2		Pichiaceae	Phaffomycetaceae	Komagataella
1099808	GCA_003705255.2	Komagataella populi	L	13076	670486	CUG-Leu2	Pichiaceae		Phaffomycetaceae	Komagataella
5007	GCA_900496985.1	Brettanomyces bruxellensis	L	6262	717194	CUG-Leu2	Pichiaceae		Pichiaceae	Brettanomyces
13368	GCA_012295335.1	Brettanomyces custersianus	L	3870	625441	CUG-Leu2	Pichiaceae		Pichiaceae	Brettanomyces
13370	GCA_012295355.1	Brettanomyces naardenensis	L	3691	686860	CUG-Leu2		Pichiaceae	Pichiaceae	Brettanomyces
13502	GCA_011074865.1	Brettanomyces nanus	L	3226	658728	CUG-Leu2		Pichiaceae	Pichiaceae	Brettanomyces
37662	GCA_001754015.1	Brettanomyces anomalus	L	3580	623227	CUG-Leu2	Pichiaceae		Pichiaceae	Brettanomyces
324739	GCA_003707205.2	Kregervanrija delftensis	L	1583	571588	CUG-Leu2	Pichiaceae		Pichiaceae	Kregervanrija
324740	GCA_003707275.2	Kregervanrija fluxuum	L	2208	606897	CUG-Leu2	Pichiaceae		Pichiaceae	Kregervanrija
324742	GCA_003705535.2	Martiniozyma abiesophila	L	1153	695381	CUG-Leu2	Pichiaceae		Pichiaceae	Martiniozyma
4923	GCA_003707665.1	Ogataea pini	L	9943	725805	CUG-Leu2	Pichiaceae		Pichiaceae	Ogataea
36023	GCA_003706155.1	Ogataea glucozyma	L	25469	775643	CUG-Leu2	Pichiaceae		Pichiaceae	Ogataea
36024	GCA_003705115.1	Ogataea henricii	L	24334	751695	CUG-Leu2	Pichiaceae		Pichiaceae	Ogataea
36026	GCA_003706195.1	Ogataea minuta	L	19004	718004	CUG-Leu2	Pichiaceae		Pichiaceae	Ogataea
50263	GCA_003706165.2	Ogataea kodamae	L	13195	702054	CUG-Leu2	Pichiaceae		Pichiaceae	Ogataea
50265	GCA_003706235.1	Ogataea naganishii	L	17934	709649	CUG-Leu2	Pichiaceae		Pichiaceae	Ogataea
50267	GCA_003707645.1	Ogataea trehalophila	L	2584	629954	CUG-Leu2	Pichiaceae		Pichiaceae	Ogataea
53649	GCA_003706205.1	Ogataea methylivora	L	2615	701365	CUG-Leu2	Pichiaceae		Pichiaceae	Ogataea
53937	GCA_003706255.1	Ogataea nonfermentans	L	18051	844158	CUG-Leu2	Pichiaceae		Pichiaceae	Ogataea
104402	GCA_003706105.2	Ogataea ramenticola	L	1498	608370	CUG-Leu2	Pichiaceae		Pichiaceae	Ogataea
157292	GCA_003707685.1	Ogataea pilisensis	L	3894	676956	CUG-Leu2	Pichiaceae		Pichiaceae	Ogataea
169509	GCA_003706095.1	Ogataea trehaloabstinens	L	11551	761043	CUG-Leu2	Pichiaceae		Pichiaceae	Ogataea
169510	GCA_003709205.2	Ogataea zsoltii	L	26341	764708	CUG-Leu2	Pichiaceae		Pichiaceae	Ogataea
460523	GCA_001664045.1	Ogataea polymorpha	L	24517	724215	CUG-Leu2	Pichiaceae		Pichiaceae	Ogataea
490708	GCA_003705625.1	Ogataea nitratoaversa	L	3033	649871	CUG-Leu2	Pichiaceae		Pichiaceae	Ogataea
550978	GCA_003707375.2	Ogataea populi-albae	L	12647	727984	CUG-Leu2		Pichiaceae	Pichiaceae	Ogataea
1005962	GCA_000187245.3	Ogataea parapolymorpha DL-1	L	24131	720552	CUG-Leu2	Pichiaceae		Pichiaceae	Ogataea
1156966	GCA_001600755.1	Ogataea methanolica	L	3813	690589	CUG-Leu2	Pichiaceae		Pichiaceae	Ogataea
1378263	GCA_003706115.2	Ogataea philodendri	L	21804	710340	CUG-Leu2	Pichiaceae		Pichiaceae	Ogataea
5477	GCA_001599335.1	[Candida] boidinii	L	779	559209	CUG-Leu2	Pichiaceae		Pichiaceae	Ogataea
51927	GCA_001599255.1	[Candida] succiphila	L	6546	667399	CUG-Leu2	Pichiaceae		Pichiaceae	Ogataea
130810	GCA_001661425.1	[Candida] arabinofermentans NRRL YB-2248	L	2188	622485	CUG-Leu2		Pichiaceae	Pichiaceae	Ogataea
4909	GCA_003054445.1	Pichia kudriavzevii	L	3848	593345	CUG-Leu2	Pichiaceae		Pichiaceae	Pichia
4921	GCA_003705465.1	Pichia norvegensis	L	2098	585146	CUG-Leu2	Pichiaceae		Pichiaceae	Pichia
4926	GCA_001661235.1	Pichia membranifaciens NRRL Y-2026	L	5847	634914	CUG-Leu2	Pichiaceae		Pichiaceae	Pichia
36015	GCA_003327685.1	Pichia kluyveri	L	564	464322	CUG-Leu2		Pichiaceae	Pichiaceae	Pichia
53655	GCA_003339355.1	Pichia fermentans	L	3294	618469	CUG-Leu2		Pichiaceae	Pichiaceae	Pichia
53656	GCA_003705495.1	Pichia nakasei	L	1456	517383	CUG-Leu2	Pichiaceae		Pichiaceae	Pichia
53659	GCA_003705525.2	Pichia heedii	L	1150	488080	CUG-Leu2	Pichiaceae		Pichiaceae	Pichia
54551	GCA_003706875.2	Pichia terricola	L	4202	586093	CUG-Leu2	Pichiaceae		Pichiaceae	Pichia
54552	GCA_003705455.2	Pichia occidentalis	L	9601	603282	CUG-Leu2	Pichiaceae		Pichiaceae	Pichia
121235	GCA_005406165.1	Pichia manshurica	L	5140	636425	CUG-Leu2		Pichiaceae	Pichiaceae	Pichia
1171599	GCA_003707355.1	Pichia exigua	L	1439	510515	CUG-Leu2	Pichiaceae		Pichiaceae	Pichia
52247	GCA_004931855.1	[Candida] inconspicua	L	2158	567626	CUG-Leu2		Pichiaceae	Pichiaceae	Pichia
52256	GCA_001649435.1	[Candida] ethanolica M2	L	982	1101996	CUG-Leu2		Pichiaceae	Pichiaceae	Pichia
49334	GCA_001599115.1	[Candida] sorboxylosa	L	8732	572935	CUG-Leu2	Pichiaceae		Pichiaceae	Pichiaceae incertae sedis
29835	GCA_003243065.1	Saturnispora dispora	L	3389	556691	CUG-Leu2	Pichiaceae		Pichiaceae	Saturnispora
52249	GCA_003707315.2	Saturnispora silvae	L	5418	566270	CUG-Leu2	Pichiaceae		Pichiaceae	Saturnispora
58634	GCA_003707305.1	Saturnispora saitoi	L	1166	511941	CUG-Leu2	Pichiaceae		Pichiaceae	Saturnispora
58635	GCA_003705435.1	Saturnispora zaruensis	L	3712	561577	CUG-Leu2	Pichiaceae		Pichiaceae	Saturnispora
297360	GCA_003707255.1	Saturnispora hagleri	L	3830	568343	CUG-Leu2	Pichiaceae		Pichiaceae	Saturnispora
324741	GCA_003705365.1	Saturnispora mendoncae	L	1350	512095	CUG-Leu2	Pichiaceae		Pichiaceae	Saturnispora
756769	GCA_003705415.1	Saturnispora serradocipensis	L	3732	570940	CUG-Leu2	Pichiaceae		Pichiaceae	Saturnispora
36909	GCA_003705165.1	Citeromyces matritensis	L	16193	811299	CUG-Leu2	Pichiaceae		Saccharomycetaceae	Citeromyces
109331	GCA_003706365.1	Citeromyces siamensis	L	26175	1173546	CUG-Leu2	Pichiaceae		Saccharomycetaceae	Citeromyces
1046750	GCA_003706345.1	Citeromyces hawaiiensis	L	16878	777871	CUG-Leu2	Pichiaceae		Saccharomycetaceae	Citeromyces
43982	GCA_001599995.1	Ambrosiozyma monospora	L	3663	780498	CUG-Leu2	Pichiaceae		Saccharomycetales incertae sedis	Ambrosiozyma
43984	GCA_003707675.2	Ambrosiozyma philentoma	L	2978	726027	CUG-Leu2	Pichiaceae		Saccharomycetales incertae sedis	Ambrosiozyma
53487	GCA_003705185.1	Ambrosiozyma ambrosiae	L	2129	628008	CUG-Leu2	Pichiaceae		Saccharomycetales incertae sedis	Ambrosiozyma
489715	GCA_001599075.1	Ambrosiozyma kashinagicola	L	2192	658438	CUG-Leu2	Pichiaceae		Saccharomycetales incertae sedis	Ambrosiozyma
489716	GCA_003707895.2	Ambrosiozyma pseudovanderkliftii	L	2745	654901	CUG-Leu2	Pichiaceae		Saccharomycetales incertae sedis	Ambrosiozyma
489717	GCA_003705225.1	Ambrosiozyma vanderkliftii	L	3122	657845	CUG-Leu2	Pichiaceae		Saccharomycetales incertae sedis	Ambrosiozyma
904902	GCA_003706635.1	Ambrosiozyma maleeae	L	7682	669170	CUG-Leu2	Pichiaceae		Saccharomycetales incertae sedis	Ambrosiozyma
1382206	GCA_003706315.2	Ambrosiozyma oregonensis	L	1414	617727	CUG-Leu2	Pichiaceae		Saccharomycetales incertae sedis	Ambrosiozyma
317047	GCA_000576695.1	Kuraishia capsulata CBS 1993	L	20165	750685	CUG-Leu2	Pichiaceae		Saccharomycetales incertae sedis	Kuraishia
317048	GCA_003706305.2	Kuraishia molischiana	L	26180	742042	CUG-Leu2	Pichiaceae		Saccharomycetales incertae sedis	Kuraishia
537810	GCA_003706285.2	Kuraishia ogatae	L	14784	733269	CUG-Leu2	Pichiaceae		Saccharomycetales incertae sedis	Kuraishia
27311	GCA_003707825.2	Cephaloascus fragrans	?	729	725352	CUG-Ser	CUG-Ser1		Cephaloascaceae	Cephaloascus
43958	GCA_003706495.1	Cephaloascus albidus	S	619	753736	CUG-Ser	CUG-Ser1		Cephaloascaceae	Cephaloascus
45609	GCA_001661335.1	Babjeviella inositovora NRRL Y-12698	?	2014	761047	CUG-Ser	CUG-Ser1		Debaryomycetaceae	Babjeviella	UAG stop codon is inferred to code for tryptophan due to 13 aligned Pfam consensus columns, probably due to Pfam domain alignment to pseudogenes.
5476	GCA_000182965.3	Candida albicans SC5314	S	1312	685174	CUG-Ser	CUG-Ser1		Debaryomycetaceae	Candida
5479	GCA_000344705.1	Candida maltosa Xu316	S	1525	799097	CUG-Ser		CUG-Ser1	Debaryomycetaceae	Candida
5480	GCA_000182765.2	Candida parapsilosis	S	1489	754685	CUG-Ser	CUG-Ser1		Debaryomycetaceae	Candida
5482	GCA_000006335.3	Candida tropicalis MYA-3404	S	1183	697940	CUG-Ser	CUG-Ser1		Debaryomycetaceae	Candida
5486	GCA_003327735.1	Candida viswanathii	S	2907	1338430	CUG-Ser		CUG-Ser1	Debaryomycetaceae	Candida
42374	GCA_000026945.1	Candida dubliniensis CD36	S	1281	686231	CUG-Ser	CUG-Ser1		Debaryomycetaceae	Candida
52253	GCA_013177575.1	Candida sojae	S	1133	685121	CUG-Ser	CUG-Ser1		Debaryomycetaceae	Candida
273371	GCA_000315875.1	Candida orthopsilosis Co 90-125	S	1342	704976	CUG-Ser	CUG-Ser1		Debaryomycetaceae	Candida
273372	GCA_900069165.1	Candida metapsilosis	S	1490	746189	CUG-Ser		CUG-Ser1	Debaryomycetaceae	Candida
391826	GCA_003706475.2	Candida corydali	S	898	693336	CUG-Ser	CUG-Ser1		Debaryomycetaceae	Candida
1759314	GCA_001005365.1	Candida sp. LDI48194	S	1227	703298	CUG-Ser		CUG-Ser1	Debaryomycetaceae	Candida
130807	GCA_003706395.1	Danielozyma ontarioensis	S	2056	757169	CUG-Ser	CUG-Ser1		Debaryomycetaceae	Danielozyma
4959	GCA_000006445.2	Debaryomyces hansenii CBS767	S	1474	780795	CUG-Ser	CUG-Ser1		Debaryomycetaceae	Debaryomyces
27297	GCA_003708605.2	Debaryomyces maramus	S	1427	740157	CUG-Ser	CUG-Ser1		Debaryomycetaceae	Debaryomyces
27299	GCA_003708585.1	Debaryomyces nepalensis	S	1478	761581	CUG-Ser	CUG-Ser1		Debaryomycetaceae	Debaryomyces
45577	GCA_900186205.1	[Candida] psychrophila	S	1377	715518	CUG-Ser	CUG-Ser1		Debaryomycetaceae	Debaryomyces	UGA stop codon is inferred to code for tryptophan due to 22 aligned Pfam consensus columns, probably due to Pfam domain alignment to pseudogenes.
58627	GCA_001447935.2	Debaryomyces fabryii	S	1425	773416	CUG-Ser	CUG-Ser1		Debaryomycetaceae	Debaryomyces
148098	GCA_003708935.1	Debaryomyces prosopidis	S	1477	798309	CUG-Ser	CUG-Ser1		Debaryomycetaceae	Debaryomyces
522693	GCA_003708965.1	Debaryomyces subglobosus	S	1411	755925	CUG-Ser	CUG-Ser1		Debaryomycetaceae	Debaryomyces
45558	GCA_001599095.1	Hyphopichia homilentoma	S	2685	754588	CUG-Ser	CUG-Ser1		Debaryomycetaceae	Hyphopichia
507511	GCA_003706925.2	Hyphopichia heimii	S	1365	775275	CUG-Ser	CUG-Ser1		Debaryomycetaceae	Hyphopichia
717740	GCA_001661395.1	Hyphopichia burtonii NRRL Y-1933	S	1203	695109	CUG-Ser	CUG-Ser1		Debaryomycetaceae	Hyphopichia
717741	GCA_003856775.1	Hyphopichia pseudoburtonii	S	1941	688466	CUG-Ser		CUG-Ser1	Debaryomycetaceae	Hyphopichia
45581	GCA_003708185.2	[Candida] rhagii	S	1306	751275	CUG-Ser	CUG-Ser1		Debaryomycetaceae	Hyphopichia
87895	GCA_003708205.1	[Candida] gotoi	S	1360	774359	CUG-Ser	CUG-Ser1		Debaryomycetaceae	Hyphopichia
121466	GCA_003707135.1	Kurtzmaniella cleridarum	S	4487	638508	CUG-Ser	CUG-Ser1		Debaryomycetaceae	Kurtzmaniella
45587	GCA_003707405.1	[Candida] schatavii	S	4108	755293	CUG-Ser	CUG-Ser1		Debaryomycetaceae	Kurtzmaniella
52254	GCA_003706895.1	[Candida] fragi	S	4942	671070	CUG-Ser	CUG-Ser1		Debaryomycetaceae	Kurtzmaniella
36914	GCA_000149685.1	Lodderomyces elongisporus NRRL YB-4239	S	1611	673951	CUG-Ser	CUG-Ser1		Debaryomycetaceae	Lodderomyces
4929	GCA_000149425.1	Meyerozyma guilliermondii ATCC 6260	S	3144	778836	CUG-Ser	CUG-Ser1		Debaryomycetaceae	Meyerozyma
66948	GCA_000755205.1	Meyerozyma caribbica MG20W	S	3181	786622	CUG-Ser	CUG-Ser1		Debaryomycetaceae	Meyerozyma
304220	GCA_003705555.1	Meyerozyma athensensis	S	3139	729903	CUG-Ser		CUG-Ser1	Debaryomycetaceae	Meyerozyma
374178	GCA_001599235.1	Meyerozyma carpophila	S	3210	770828	CUG-Ser	CUG-Ser1		Debaryomycetaceae	Meyerozyma
2028340	GCA_003676015.1	Meyerozyma sp. JA9	S	3207	771334	CUG-Ser		CUG-Ser1	Debaryomycetaceae	Meyerozyma
4920	GCA_002196765.1	Millerozyma farinosa	S	3835	1418805	CUG-Ser		CUG-Ser1	Debaryomycetaceae	Millerozyma
28986	GCA_001600675.1	Millerozyma acaciae	S	1716	717748	CUG-Ser	CUG-Ser1		Debaryomycetaceae	Millerozyma
28549	GCA_003709225.2	Priceomyces carsonii	S	1697	762848	CUG-Ser	CUG-Ser1		Debaryomycetaceae	Priceomyces
45501	GCA_003706855.2	Priceomyces castillae	S	1604	694448	CUG-Ser	CUG-Ser1		Debaryomycetaceae	Priceomyces
45502	GCA_001599895.1	Priceomyces haplophilus	S	1765	697780	CUG-Ser	CUG-Ser1		Debaryomycetaceae	Priceomyces
45504	GCA_003705335.1	Priceomyces medius	S	1610	702530	CUG-Ser	CUG-Ser1		Debaryomycetaceae	Priceomyces
4924	GCA_000209165.1	Scheffersomyces stipitis CBS 6054	S	2058	801843	CUG-Ser	CUG-Ser1		Debaryomycetaceae	Scheffersomyces
45589	GCA_002118035.1	Scheffersomyces shehatae	S	1594	789675	CUG-Ser		CUG-Ser1	Debaryomycetaceae	Scheffersomyces
1111081	GCA_001599395.1	Scheffersomyces lignosus	S	1655	802235	CUG-Ser	CUG-Ser1		Debaryomycetaceae	Scheffersomyces
1751990	GCA_002245345.1	Scheffersomyces stambukii	S	1707	733766	CUG-Ser		CUG-Ser1	Debaryomycetaceae	Scheffersomyces
340170	GCA_000223485.1	Spathaspora passalidarum NRRL Y-27907	S	1705	740683	CUG-Ser	CUG-Ser1		Debaryomycetaceae	Spathaspora
979894	GCA_000497715.1	Spathaspora arborariae UFMG-19.1A	S	1318	641734	CUG-Ser	CUG-Ser1		Debaryomycetaceae	Spathaspora
1699422	GCA_002105455.1	Spathaspora xylofermentans	S	1146	709100	CUG-Ser		CUG-Ser1	Debaryomycetaceae	Spathaspora
1701548	GCA_002094185.1	Spathaspora boniae	S	1787	745567	CUG-Ser		CUG-Ser1	Debaryomycetaceae	Spathaspora
1774706	GCA_001655755.1	Spathaspora hagerdaliae	S	1171	765087	CUG-Ser	CUG-Ser1		Debaryomycetaceae	Spathaspora
1774708	GCA_001657455.1	Spathaspora girioi	S	1651	729679	CUG-Ser	CUG-Ser1		Debaryomycetaceae	Spathaspora
1852163	GCA_001655765.1	Spathaspora gorwiae	S	1164	763195	CUG-Ser	CUG-Ser1		Debaryomycetaceae	Spathaspora
1864610	GCA_002911495.1	Spathaspora sp. UFMG-CM-Y6060	S	1528	682407	CUG-Ser		CUG-Ser1	Debaryomycetaceae	Spathaspora
2028339	GCA_003676035.1	Spathaspora sp. JA1	S	1585	709252	CUG-Ser		CUG-Ser1	Debaryomycetaceae	Spathaspora
46583	GCA_001661415.1	Suhomyces tanzawaensis NRRL Y-17324	S	1498	732801	CUG-Ser	CUG-Ser1		Debaryomycetaceae	Suhomyces
147331	GCA_003706505.2	Suhomyces pyralidae	S	1651	715509	CUG-Ser	CUG-Ser1		Debaryomycetaceae	Suhomyces
147334	GCA_003706525.1	Suhomyces canberraensis	S	1440	724337	CUG-Ser	CUG-Ser1		Debaryomycetaceae	Suhomyces
246006	GCA_003707835.2	Suhomyces emberorum	S	1513	721491	CUG-Ser	CUG-Ser1		Debaryomycetaceae	Suhomyces
45561	GCA_003706535.1	Teunomyces kruisii	S	2168	844692	CUG-Ser	CUG-Ser1		Debaryomycetaceae	Teunomyces
268492	GCA_003706575.1	Teunomyces cretensis	S	1913	763036	CUG-Ser	CUG-Ser1		Debaryomycetaceae	Teunomyces
392264	GCA_003706565.2	Teunomyces gatunensis	S	2813	728727	CUG-Ser	CUG-Ser1		Debaryomycetaceae	Teunomyces
45790	GCA_001599155.1	Wickerhamia fluorescens	S	3574	660360	CUG-Ser	CUG-Ser1		Debaryomycetaceae	Wickerhamia
45506	GCA_003706715.1	Yamadazyma nakazawae	S	1707	708308	CUG-Ser	CUG-Ser1		Debaryomycetaceae	Yamadazyma
45510	GCA_003706995.2	Yamadazyma philogaea	S	1843	710166	CUG-Ser	CUG-Ser1		Debaryomycetaceae	Yamadazyma
45511	GCA_003707025.1	Yamadazyma scolyti	S	1477	741262	CUG-Ser	CUG-Ser1		Debaryomycetaceae	Yamadazyma
1944661	GCA_002109505.1	Yamadazyma laniorum	S	1880	739549	CUG-Ser		CUG-Ser1	Debaryomycetaceae	Yamadazyma
2315449	GCA_000223465.1	Yamadazyma tenuis ATCC 10573	S	2198	750278	CUG-Ser	CUG-Ser1		Debaryomycetaceae	Yamadazyma
45518	GCA_002068075.1	[Candida] aaseri	S	1076	679901	CUG-Ser		CUG-Ser1	Debaryomycetaceae	Yamadazyma
130808	GCA_003708705.1	[Candida] tammaniensis	S	1385	670947	CUG-Ser	CUG-Ser1		Debaryomycetaceae	Yamadazyma
271357	GCA_003708985.2	[Candida] gorgasii	S	1249	731719	CUG-Ser	CUG-Ser1		Debaryomycetaceae	Yamadazyma
391823	GCA_003708745.2	[Candida] ascalaphidarum	S	4963	711282	CUG-Ser	CUG-Ser1		Debaryomycetaceae	Yamadazyma
43968	GCA_003707435.1	Aciculoconidium aculeatum	S	2311	683053	CUG-Ser	CUG-Ser1		Metschnikowiaceae	Aciculoconidium
36911	GCA_000003835.1	Clavispora lusitaniae ATCC 42720	S	3275	710471	CUG-Ser		CUG-Ser1	Metschnikowiaceae	Clavispora
46582	GCA_003707795.1	Clavispora fructus	S	3430	699828	CUG-Ser	CUG-Ser1		Metschnikowiaceae	Clavispora
45354	GCA_900106115.1	[Candida] intermedia	S	3123	757787	CUG-Ser	CUG-Ser1		Metschnikowiaceae	Clavispora
45357	GCA_002926055.1	[Candida] haemulonis	S	3267	729352	CUG-Ser		CUG-Ser1	Metschnikowiaceae	Clavispora
46584	GCA_003707785.2	[Candida] oregonensis	S	4181	752203	CUG-Ser	CUG-Ser1		Metschnikowiaceae	Clavispora
391824	GCA_003706955.2	[Candida] blattae	S	3871	789517	CUG-Ser	CUG-Ser1		Metschnikowiaceae	Clavispora
418784	GCA_003013735.1	[Candida] pseudohaemulonis	S	3630	725793	CUG-Ser		CUG-Ser1	Metschnikowiaceae	Clavispora
487108	GCA_003708405.1	[Candida] heveicola	S	3793	724340	CUG-Ser	CUG-Ser1		Metschnikowiaceae	Clavispora
498019	GCA_002775015.1	[Candida] auris	S	3132	728633	CUG-Ser	CUG-Ser1		Metschnikowiaceae	Clavispora
1231522	GCA_002926085.1	[Candida] duobushaemulonis	S	3631	721985	CUG-Ser		CUG-Ser1	Metschnikowiaceae	Clavispora
34356	GCA_004919595.1	Kodamaea ohmeri	S	4262	705038	CUG-Ser	CUG-Ser1		Metschnikowiaceae	Kodamaea
271274	GCA_003705675.1	Kodamaea laetipori	S	3868	733380	CUG-Ser	CUG-Ser1		Metschnikowiaceae	Kodamaea
77849	GCA_003707425.2	[Candida] restingae	S	4446	709851	CUG-Ser	CUG-Ser1		Metschnikowiaceae	Kodamaea
27321	GCA_002073855.1	Metschnikowia australis	S	3528	676370	CUG-Ser		CUG-Ser1	Metschnikowiaceae	Metschnikowia
27322	GCA_001664035.1	Metschnikowia bicuspidata var. bicuspidata NRRL YB-4993	S	3505	686051	CUG-Ser	CUG-Ser1		Metschnikowiaceae	Metschnikowia
27323	GCA_002370325.1	Metschnikowia hawaiiensis	S	3212	682250	CUG-Ser	CUG-Ser1		Metschnikowiaceae	Metschnikowia
27326	GCA_009932455.1	Metschnikowia pulcherrima	S	5607	844922	CUG-Ser		CUG-Ser1	Metschnikowiaceae	Metschnikowia
27327	GCA_003401635.1	Metschnikowia reukaufii	S	3289	709316	CUG-Ser		CUG-Ser1	Metschnikowiaceae	Metschnikowia
56417	GCA_008065255.1	Metschnikowia agaves	S	2797	696729	CUG-Ser		CUG-Ser1	Metschnikowiaceae	Metschnikowia
73517	GCA_002370835.1	Metschnikowia continentalis	S	3083	681716	CUG-Ser	CUG-Ser1		Metschnikowiaceae	Metschnikowia
73518	GCA_002374385.1	Metschnikowia borealis	S	3124	686467	CUG-Ser	CUG-Ser1		Metschnikowiaceae	Metschnikowia
73520	GCA_002374725.1	Metschnikowia hibisci	S	3308	668920	CUG-Ser	CUG-Ser1		Metschnikowiaceae	Metschnikowia
135832	GCA_002370915.1	Metschnikowia lochheadii	S	3071	678483	CUG-Ser	CUG-Ser1		Metschnikowiaceae	Metschnikowia
135833	GCA_002893735.1	Metschnikowia drosophilae	S	2742	670345	CUG-Ser		CUG-Ser1	Metschnikowiaceae	Metschnikowia
150206	GCA_002370875.1	Metschnikowia arizonensis	S	2980	660384	CUG-Ser	CUG-Ser1		Metschnikowiaceae	Metschnikowia
150224	GCA_002893665.1	Metschnikowia orientalis	S	3101	671824	CUG-Ser		CUG-Ser1	Metschnikowiaceae	Metschnikowia
174643	GCA_009756545.1	Metschnikowia dekortorum	S	3169	689129	CUG-Ser	CUG-Ser1		Metschnikowiaceae	Metschnikowia
178747	GCA_000317355.2	Metschnikowia fructicola 277	S	7650	1130514	CUG-Ser		CUG-Ser1	Metschnikowiaceae	Metschnikowia
197673	GCA_002370135.1	Metschnikowia kipukae	S	3050	679011	CUG-Ser	CUG-Ser1		Metschnikowiaceae	Metschnikowia
197674	GCA_002374485.1	Metschnikowia santaceciliae	S	3116	683937	CUG-Ser	CUG-Ser1		Metschnikowiaceae	Metschnikowia
301365	GCA_002370815.1	Metschnikowia hamakuensis	S	3214	683914	CUG-Ser	CUG-Ser1		Metschnikowiaceae	Metschnikowia
301367	GCA_002374535.1	Metschnikowia kamakouana	S	3140	676041	CUG-Ser	CUG-Ser1		Metschnikowiaceae	Metschnikowia
301368	GCA_002374555.1	Metschnikowia mauinuiana	S	3120	675159	CUG-Ser	CUG-Ser1		Metschnikowiaceae	Metschnikowia
353897	GCA_002370615.1	Metschnikowia aberdeeniae	S	3438	674204	CUG-Ser	CUG-Ser1		Metschnikowiaceae	Metschnikowia
353899	GCA_002374645.1	Metschnikowia shivogae	S	3443	672014	CUG-Ser	CUG-Ser1		Metschnikowiaceae	Metschnikowia
390697	GCA_002370635.1	Metschnikowia cerradonensis	S	3093	683353	CUG-Ser	CUG-Ser1		Metschnikowiaceae	Metschnikowia
473035	GCA_002370175.1	Metschnikowia colocasiae	S	3071	678030	CUG-Ser		CUG-Ser1	Metschnikowiaceae	Metschnikowia
473037	GCA_002370765.1	Metschnikowia similis	S	3136	688247	CUG-Ser	CUG-Ser1		Metschnikowiaceae	Metschnikowia
1150643	GCA_002370515.1	Metschnikowia proteae	S	3006	669140	CUG-Ser	CUG-Ser1		Metschnikowiaceae	Metschnikowia
1323754	GCA_002374405.1	Metschnikowia cubensis	S	3145	683750	CUG-Ser		CUG-Ser1	Metschnikowiaceae	Metschnikowia
1506548	GCA_002370475.1	Metschnikowia drakensbergensis	S	3038	672535	CUG-Ser	CUG-Ser1		Metschnikowiaceae	Metschnikowia
1506549	GCA_008065175.1	Metschnikowia caudata	S	3478	659143	CUG-Ser		CUG-Ser1	Metschnikowiaceae	Metschnikowia
1697385	GCA_002370695.1	Metschnikowia matae var. maris	S	3045	678411	CUG-Ser	CUG-Ser1		Metschnikowiaceae	Metschnikowia
1699426	GCA_002370295.1	Metschnikowia bowlesiae	S	3133	689971	CUG-Ser	CUG-Ser1		Metschnikowiaceae	Metschnikowia
2163413	GCA_004217705.1	Metschnikowia aff. pulcherrima	S	4570	718891	CUG-Ser		CUG-Ser1	Metschnikowiaceae	Metschnikowia
2259054	GCA_009746055.1	Metschnikowia citriensis	S	7530	1152097	CUG-Ser		CUG-Ser1	Metschnikowiaceae	Metschnikowia
2576851	GCA_008065195.1	Metschnikowia amazonensis	S	3037	672710	CUG-Ser		CUG-Ser1	Metschnikowiaceae	Metschnikowia
45599	GCA_002893725.1	[Candida] torresii	S	2805	671416	CUG-Ser		CUG-Ser1	Metschnikowiaceae	Metschnikowia
197672	GCA_002893645.1	[Candida] hawaiiana	S	2759	674787	CUG-Ser	CUG-Ser1		Metschnikowiaceae	Metschnikowia
560360	GCA_003708715.2	[Candida] wancherniae	S	2966	683426	CUG-Ser	CUG-Ser1		Metschnikowiaceae	Metschnikowia
1323752	GCA_003708755.1	[Candida] golubevii	S	3370	695290	CUG-Ser	CUG-Ser1		Metschnikowiaceae	Metschnikowia
1807681	GCA_002370145.1	[Candida] ipomoeae	S	3095	678387	CUG-Ser		CUG-Ser1	Metschnikowiaceae	Metschnikowia	UGA stop codon is inferred to code for tryptophan due to 8 aligned Pfam consensus columns, probably due to Pfam domain alignment to pseudogenes.
1769792	GCA_002894445.1	Metschnikowia sp. AWRI3582	S	4056	647944	CUG-Ser		CUG-Ser1	Metschnikowiaceae	Metschnikowia
1807683	GCA_002370645.1	Metschnikowia sp. 00-154.1	S	3117	681838	CUG-Ser		CUG-Ser1	Metschnikowiaceae	Metschnikowia
1807684	GCA_002370185.1	Metschnikowia sp. 01-655c1	S	3106	678885	CUG-Ser		CUG-Ser1	Metschnikowiaceae	Metschnikowia
1807685	GCA_002370795.1	Metschnikowia sp. 03-147.1	S	3190	680831	CUG-Ser		CUG-Ser1	Metschnikowiaceae	Metschnikowia
1807686	GCA_002374635.1	Metschnikowia sp. 04-218.3	S	3058	665396	CUG-Ser		CUG-Ser1	Metschnikowiaceae	Metschnikowia
1807687	GCA_002370245.1	Metschnikowia sp. 04-226.1	S	3112	670498	CUG-Ser		CUG-Ser1	Metschnikowiaceae	Metschnikowia
1807688	GCA_002374735.1	Metschnikowia sp. 13-106.1	S	3130	688312	CUG-Ser		CUG-Ser1	Metschnikowiaceae	Metschnikowia
1807689	GCA_002370575.1	Metschnikowia sp. M2Y3	S	3286	678011	CUG-Ser		CUG-Ser1	Metschnikowiaceae	Metschnikowia
2562755	GCA_005406065.1	Metschnikowia sp. JCM 33374	S	2887	681496	CUG-Ser		CUG-Ser1	Metschnikowiaceae	Metschnikowia
2654411	GCA_009756645.1	Metschnikowia sp. UWOPS 12.619.2	S	3170	691260	CUG-Ser		CUG-Ser1	Metschnikowiaceae	Metschnikowia
2654412	GCA_009756565.1	Metschnikowia sp. UWOPS 03-167b3	S	3153	685645	CUG-Ser		CUG-Ser1	Metschnikowiaceae	Metschnikowia
2654413	GCA_009756535.1	Metschnikowia sp. UFMG-CM-y6306	S	3208	690340	CUG-Ser		CUG-Ser1	Metschnikowiaceae	Metschnikowia
39397	GCA_003243815.1	[Candida] sake	S	1288	710796	CUG-Ser		CUG-Ser1	Saccharomycetales incertae sedis	Candida	Tsui et al (2008) show that Candida sake clusters with CUG-Ser1 species in rRNA tree
5481	GCA_008704595.1	Diutina rugosa	S	13371	674569	CUG-Ser		CUG-Ser1	Saccharomycetales incertae sedis	Diutina	O'Brien et al (2018) show that Diutina are members of the CUG-Ser1 clade
45537	GCA_003285555.1	Diutina catenulata	S	13248	674098	CUG-Ser		CUG-Ser1	Saccharomycetales incertae sedis	Diutina	O'Brien et al (2018) show that Diutina are members of the CUG-Ser1 clade
54195	GCA_001661345.1	Ascoidea rubescens DSM 1968	?	265	569183	CUG-Ser/Leu		CUG-Ser2	Ascoideaceae	Ascoidea
1301101	GCA_001600695.1	Ascoidea asiatica	?	75	482798	CUG-Ser/Leu	CUG-Ser2		Ascoideaceae	Ascoidea
4944	GCA_001936275.1	Saccharomycopsis fibuligera	?	706	660788	CUG-Ser/Leu		CUG-Ser2	Saccharomycopsidaceae	Saccharomycopsis
36036	GCA_003705375.1	Saccharomycopsis capsularis	?	783	703337	CUG-Ser/Leu	CUG-Ser2		Saccharomycopsidaceae	Saccharomycopsis
43959	GCA_010994405.1	Saccharomycopsis crataegensis	?	734	663762	CUG-Ser/Leu		CUG-Ser2	Saccharomycopsidaceae	Saccharomycopsis
44092	GCA_004014935.1	Saccharomycopsis malanga	?	941	667803	CUG-Ser/Leu	CUG-Ser2		Saccharomycopsidaceae	Saccharomycopsis
53486	GCA_002564245.1	Saccharomycopsis fermentans	S	906	574339	CUG-Ser/Leu		CUG-Ser2	Saccharomycopsidaceae	Saccharomycopsis
1305767	GCA_002564235.1	Saccharomycopsis fodiens	S	4104	708025	CUG-Ser/Leu		CUG-Ser2	Saccharomycopsidaceae	Saccharomycopsis
1725355	GCA_001936135.1	Saccharomycopsis fibuligera x Saccharomycopsis cf. fibuligera	?	1452	1341630	CUG-Ser/Leu		CUG-Ser2	Saccharomycopsidaceae	Saccharomycopsis
44080	GCA_010994365.1	Saccharomycopsis schoenii	S	832	566826	CUG-Ser/Leu		CUG-Ser2	Saccharomycopsidaceae	Saccharomycopsis
1504575	GCA_002895615.1	Saccharomycopsis sp. UWO(PS) 91-127.1	S	1538	648561	CUG-Ser/Leu		CUG-Ser2	Saccharomycopsidaceae	Saccharomycopsis
54196	GCA_001600815.1	Alloascoidea hylecoeti	L	2770	793896	Outgroup	Alloascoideaceae		Alloascoideaceae	Alloascoidea
27315	GCA_003707475.1	Dipodascus albidus	L	5992	724804	Outgroup	Dipodascaceae/Trichomonascaceae		Dipodascaceae	Dipodascus
44078	GCA_003708655.1	Dipodascus geniculatus	L	13626	751260	Outgroup	Dipodascaceae/Trichomonascaceae		Dipodascaceae	Dipodascus
44066	GCA_002233575.1	Geotrichum fermentans	L	17435	749395	Outgroup		Dipodascaceae/Trichomonascaceae	Dipodascaceae	Geotrichum
1173061	GCA_011420275.1	Geotrichum candidum	L	17619	836365	Outgroup	Dipodascaceae/Trichomonascaceae		Dipodascaceae	Geotrichum
44077	GCA_900497715.1	Magnusiomyces ingens NRRL Y-17630	L	13164	691135	Outgroup		Dipodascaceae/Trichomonascaceae	Dipodascaceae	Magnusiomyces
1095183	GCA_900497725.1	Magnusiomyces capitatus NRRL Y-17686	L	3593	613031	Outgroup		Dipodascaceae/Trichomonascaceae	Dipodascaceae	Magnusiomyces
1232584	GCA_003708635.2	Magnusiomyces tetraspermus NRRL Y-7288	L	7704	822129	Outgroup	Dipodascaceae/Trichomonascaceae		Dipodascaceae	Magnusiomyces
2496157	GCA_000817185.1	Magnusiomyces capitatus CNRMA 12.647	L	4895	600217	Outgroup	Dipodascaceae/Trichomonascaceae		Dipodascaceae	Magnusiomyces
44074	GCA_900642975.1	Saprochaete suaveolens	L	8933	846664	Outgroup		Dipodascaceae/Trichomonascaceae	Dipodascaceae	Saprochaete
1734004	GCA_900654225.1	Saprochaete fungicola	L	5634	672423	Outgroup		Dipodascaceae/Trichomonascaceae	Dipodascaceae	Saprochaete
2606893	GCA_902498895.1	Saprochaete ingens	L	6809	599210	Outgroup		Dipodascaceae/Trichomonascaceae	Dipodascaceae	Saprochaete
45794	GCA_003705295.1	Sporopachydermia lactativora	L	20363	664043	Outgroup	Sporopachydermia clade		Dipodascaceae	Sporopachydermia
54094	GCA_001599295.1	Sporopachydermia quercuum	L	5621	652267	Outgroup	Sporopachydermia clade		Dipodascaceae	Sporopachydermia
4952	GCA_000002525.1	Yarrowia lipolytica CLIB122	L	34020	795470	Outgroup	Dipodascaceae/Trichomonascaceae		Dipodascaceae	Yarrowia
197054	GCA_900519055.1	Yarrowia galli	L	33429	796378	Outgroup		Dipodascaceae/Trichomonascaceae	Dipodascaceae	Yarrowia
388557	GCA_900519015.1	Yarrowia osloensis	L	40627	802812	Outgroup		Dipodascaceae/Trichomonascaceae	Dipodascaceae	Yarrowia
444778	GCA_900519005.1	Yarrowia phangngaensis	L	17008	730196	Outgroup		Dipodascaceae/Trichomonascaceae	Dipodascaceae	Yarrowia
479092	GCA_900518985.1	Yarrowia alimentaria	L	32917	775175	Outgroup		Dipodascaceae/Trichomonascaceae	Dipodascaceae	Yarrowia
479094	GCA_900519065.1	Yarrowia hollandica	L	32090	776811	Outgroup		Dipodascaceae/Trichomonascaceae	Dipodascaceae	Yarrowia
479095	GCA_900519045.1	Yarrowia divulgata	L	39439	799302	Outgroup	Dipodascaceae/Trichomonascaceae		Dipodascaceae	Yarrowia
1402413	GCA_900519075.1	Yarrowia bubula	L	32835	774927	Outgroup	Dipodascaceae/Trichomonascaceae		Dipodascaceae	Yarrowia
1527289	GCA_900518995.1	Yarrowia yakushimensis	L	34419	789960	Outgroup		Dipodascaceae/Trichomonascaceae	Dipodascaceae	Yarrowia
1540335	GCA_900519025.1	Yarrowia porcina	L	28424	776851	Outgroup		Dipodascaceae/Trichomonascaceae	Dipodascaceae	Yarrowia
1608523	GCA_900519085.1	Yarrowia deformans	L	38249	795933	Outgroup	Dipodascaceae/Trichomonascaceae		Dipodascaceae	Yarrowia
1635098	GCA_001600195.1	Yarrowia keelungensis	L	38536	796001	Outgroup	Dipodascaceae/Trichomonascaceae		Dipodascaceae	Yarrowia
1635099	GCA_001600515.1	Yarrowia sp. JCM 30694	L	32507	793676	Outgroup		Dipodascaceae/Trichomonascaceae	Dipodascaceae	Yarrowia
1635100	GCA_001600535.1	Yarrowia sp. JCM 30696	L	40375	792607	Outgroup		Dipodascaceae/Trichomonascaceae	Dipodascaceae	Yarrowia
1635101	GCA_001602355.1	Yarrowia sp. JCM 30695	L	38360	794186	Outgroup		Dipodascaceae/Trichomonascaceae	Dipodascaceae	Yarrowia
29829	GCA_001661325.1	Lipomyces starkeyi NRRL Y-11557	L	13225	759724	Outgroup	Lipomycetaceae		Lipomycetaceae	Lipomyces
34357	GCA_003705905.1	Lipomyces kononenkoae	L	13057	721028	Outgroup	Lipomycetaceae		Lipomycetaceae	Lipomyces
36043	GCA_003705915.1	Lipomyces lipofer	L	17937	775267	Outgroup	Lipomycetaceae		Lipomycetaceae	Lipomyces
45792	GCA_003707545.2	Lipomyces oligophaga	L	10598	655441	Outgroup	Lipomycetaceae		Lipomycetaceae	Lipomyces
56418	GCA_003707585.2	Lipomyces arxii	L	12923	736316	Outgroup	Lipomycetaceae		Lipomycetaceae	Lipomyces
56871	GCA_003705895.1	Lipomyces japonicus	L	9081	649627	Outgroup	Lipomycetaceae		Lipomycetaceae	Lipomyces
56874	GCA_003705845.2	Lipomyces mesembrius	L	11874	670955	Outgroup	Lipomycetaceae		Lipomycetaceae	Lipomyces
383834	GCA_003705865.1	Lipomyces doorenjongii	L	11963	637405	Outgroup	Lipomycetaceae		Lipomycetaceae	Lipomyces
1337062	GCA_003705835.2	Lipomyces suomiensis	L	10156	684493	Outgroup	Lipomycetaceae		Lipomycetaceae	Lipomyces
1888986	GCA_004919795.1	Hanseniaspora sp. CRUB 1602	L	661	350473	Outgroup		Saccharomycetaceae	Saccharomycetaceae	Hanseniaspora
49327	GCA_003706695.2	[Candida] incommunis	L	15239	712800	Outgroup	Dipodascaceae/Trichomonascaceae		Saccharomycetales incertae sedis	Candida
312227	GCA_900535975.1	[Candida] hispaniensis	L	8731	669257	Outgroup	Dipodascaceae/Trichomonascaceae		Saccharomycetales incertae sedis	Candida
1470396	GCA_003706415.2	Deakozyma indianensis	L	18416	721895	Outgroup	Dipodascaceae/Trichomonascaceae		Saccharomycetales incertae sedis	Deakozyma
45597	GCA_003708105.2	Middelhovenomyces tepae	L	7709	765895	Outgroup	Dipodascaceae/Trichomonascaceae		Saccharomycetales incertae sedis	Middelhovenomyces
43970	GCA_003123035.1	Nadsonia starkeyi-henricii	L	6273	704309	Outgroup		Dipodascaceae/Trichomonascaceae	Saccharomycetales incertae sedis	Nadsonia
45786	GCA_001661315.1	Nadsonia fulvescens var. elongata DSM 6958	L	6389	695408	Outgroup	Dipodascaceae/Trichomonascaceae		Saccharomycetales incertae sedis	Nadsonia
5490	GCA_003033435.1	Starmerella magnoliae	L	24427	590549	Outgroup		Dipodascaceae/Trichomonascaceae	Saccharomycetales incertae sedis	Starmerella
29830	GCA_001005415.1	Starmerella apicola	L	8815	569546	Outgroup	Dipodascaceae/Trichomonascaceae		Saccharomycetales incertae sedis	Starmerella
45555	GCA_004125075.1	Starmerella gropengiesseri	L	20529	522451	Outgroup		Dipodascaceae/Trichomonascaceae	Saccharomycetales incertae sedis	Starmerella
45600	GCA_004125185.1	Starmerella vaccinii	L	19255	601869	Outgroup		Dipodascaceae/Trichomonascaceae	Saccharomycetales incertae sedis	Starmerella
46361	GCA_004125165.1	Starmerella geochares	L	19550	590599	Outgroup		Dipodascaceae/Trichomonascaceae	Saccharomycetales incertae sedis	Starmerella
75736	GCA_001599315.1	Starmerella bombicola	L	11846	563737	Outgroup	Dipodascaceae/Trichomonascaceae		Saccharomycetales incertae sedis	Starmerella
140312	GCA_004125005.1	Starmerella sorbosivorans	L	26288	605296	Outgroup		Dipodascaceae/Trichomonascaceae	Saccharomycetales incertae sedis	Starmerella
225544	GCA_004124975.1	Starmerella ratchasimensis	L	22663	568513	Outgroup		Dipodascaceae/Trichomonascaceae	Saccharomycetales incertae sedis	Starmerella
308924	GCA_004124955.1	Starmerella riodocensis	L	22547	562757	Outgroup		Dipodascaceae/Trichomonascaceae	Saccharomycetales incertae sedis	Starmerella
1008382	GCA_004124915.1	Starmerella kuoi	L	6456	489272	Outgroup		Dipodascaceae/Trichomonascaceae	Saccharomycetales incertae sedis	Starmerella
1247836	GCA_002270425.1	Starmerella bacillaris	L	5161	412005	Outgroup		Dipodascaceae/Trichomonascaceae	Saccharomycetales incertae sedis	Starmerella
2528786	GCA_004124985.1	Starmerella davenportii	L	20288	497923	Outgroup		Dipodascaceae/Trichomonascaceae	Saccharomycetales incertae sedis	Starmerella
121468	GCA_004125055.1	Starmerella sp. 'tilneyi'	L	16095	606958	Outgroup		Dipodascaceae/Trichomonascaceae	Saccharomycetales incertae sedis	Starmerella
44067	GCA_003707485.2	Blastobotrys proliferans	L	17780	836535	Outgroup	Dipodascaceae/Trichomonascaceae		Trichomonascaceae	Blastobotrys
44073	GCA_003707525.2	Blastobotrys niveus	L	8882	733368	Outgroup		Dipodascaceae/Trichomonascaceae	Trichomonascaceae	Blastobotrys
267478	GCA_003705765.2	Blastobotrys mokoenaii	L	23430	793087	Outgroup	Dipodascaceae/Trichomonascaceae		Trichomonascaceae	Blastobotrys
378046	GCA_003705745.2	Blastobotrys muscicola	L	32028	774394	Outgroup	Dipodascaceae/Trichomonascaceae		Trichomonascaceae	Blastobotrys
378051	GCA_003705735.2	Blastobotrys peoriensis	L	26808	834459	Outgroup	Dipodascaceae/Trichomonascaceae		Trichomonascaceae	Blastobotrys
456365	GCA_003705695.1	Blastobotrys serpentis	L	10027	814528	Outgroup	Dipodascaceae/Trichomonascaceae		Trichomonascaceae	Blastobotrys
1548389	GCA_003705705.1	Blastobotrys raffinosifermentans	L	27520	830670	Outgroup	Dipodascaceae/Trichomonascaceae		Trichomonascaceae	Blastobotrys
1850976	GCA_003705795.2	Blastobotrys americana	L	13032	752139	Outgroup	Dipodascaceae/Trichomonascaceae		Trichomonascaceae	Blastobotrys
1194607	GCA_003705635.1	Diddensiella caesifluorescens	L	20068	809134	Outgroup	Dipodascaceae/Trichomonascaceae		Trichomonascaceae	Diddensiella
49332	GCA_003708315.2	Groenewaldozyma salmanticensis	L	14597	717246	Outgroup	Dipodascaceae/Trichomonascaceae		Trichomonascaceae	Groenewaldozyma
933994	GCA_003705305.2	Spencermartinsiella europaea	L	25897	840590	Outgroup	Dipodascaceae/Trichomonascaceae		Trichomonascaceae	Spencermartinsiella
796027	GCA_001640025.2	Sugiyamaella lignohabitans	L	12825	740378	Outgroup	Dipodascaceae/Trichomonascaceae		Trichomonascaceae	Sugiyamaella
1234609	GCA_001939105.2	Sugiyamaella xylanicola	L	13320	743453	Outgroup		Dipodascaceae/Trichomonascaceae	Trichomonascaceae	Sugiyamaella
44093	GCA_008704605.1	Trichomonascus ciferrii	L	18806	850212	Outgroup		Dipodascaceae/Trichomonascaceae	Trichomonascaceae	Trichomonascus
27304	GCA_001600375.1	Wickerhamiella versatilis	L	10864	675405	Outgroup	Dipodascaceae/Trichomonascaceae		Trichomonascaceae	Wickerhamiella
45553	GCA_003045245.1	Wickerhamiella galacta	L	21706	640749	Outgroup		Dipodascaceae/Trichomonascaceae	Trichomonascaceae	Wickerhamiella
45607	GCA_002251995.2	Wickerhamiella sorbophila	L	14488	598906	Outgroup		Dipodascaceae/Trichomonascaceae	Trichomonascaceae	Wickerhamiella
45788	GCA_001599275.1	Wickerhamiella domercqiae	L	11853	596775	Outgroup	Dipodascaceae/Trichomonascaceae		Trichomonascaceae	Wickerhamiella
49331	GCA_004125235.1	Wickerhamiella pararugosa	L	16791	620268	Outgroup		Dipodascaceae/Trichomonascaceae	Trichomonascaceae	Wickerhamiella
75733	GCA_003705615.1	Wickerhamiella cacticola	L	11159	645679	Outgroup	Dipodascaceae/Trichomonascaceae		Trichomonascaceae	Wickerhamiella
75734	GCA_004125095.1	Wickerhamiella occidentalis	L	9967	621804	Outgroup		Dipodascaceae/Trichomonascaceae	Trichomonascaceae	Wickerhamiella
446224	GCA_004125105.1	Wickerhamiella hasegawae	L	17562	647735	Outgroup		Dipodascaceae/Trichomonascaceae	Trichomonascaceae	Wickerhamiella
1116880	GCA_004125145.1	Wickerhamiella infanticola	L	14807	637847	Outgroup	Dipodascaceae/Trichomonascaceae		Trichomonascaceae	Wickerhamiella
45509	GCA_003707925.2	Zygoascus ofunaensis	L	12871	725615	Outgroup	Dipodascaceae/Trichomonascaceae		Trichomonascaceae	Zygoascus
374461	GCA_003707935.2	Zygoascus meyerae	L	10455	727536	Outgroup	Dipodascaceae/Trichomonascaceae		Trichomonascaceae	Zygoascus
44070	GCA_003707445.1	Botryozyma nematodophila	L	1104	582886	Outgroup	Trigonopsidaceae		Trigonopsidaceae	Botryozyma
51930	GCA_001661475.1	Tortispora caseinolytica NRRL Y-17796	L	12128	621661	Outgroup	Trigonopsidaceae		Trigonopsidaceae	Tortispora
1326887	GCA_003707115.1	Tortispora ganteri	L	9673	621496	Outgroup	Trigonopsidaceae		Trigonopsidaceae	Tortispora
1326890	GCA_011751505.1	Tortispora sangerardonensis	L	1693	565235	Outgroup		Trigonopsidaceae	Trigonopsidaceae	Tortispora
1326888	GCA_003706775.2	Tortispora starmeri	L	10459	612868	Outgroup	Trigonopsidaceae		Trigonopsidaceae	Tortispora
34364	GCA_003707065.2	Trigonopsis variabilis	L	11540	653679	Outgroup	Trigonopsidaceae		Trigonopsidaceae	Trigonopsis
45603	GCA_003706805.2	Trigonopsis vinaria	L	7312	630789	Outgroup	Trigonopsidaceae		Trigonopsidaceae	Trigonopsis
485397	GCA_001950555.1	Candida sp. JCM 15000	L	18404	693989				Saccharomycetales incertae sedis	Candida	Could not determine phylogenetic placement, excluded from analysis
