# Supplementary material for: A computational screen for alternative genetic codes in over 250,000 genomes
Source: eLife. 2021 Nov 9;10:e71402. doi: 10.7554/eLife.71402 (PMC8629427; doi:10.7554/eLife.71402)
Supplement: Figure 2—source data 2. [file elife-71402-fig2-data2.gz]

undefined
