# Supplementary material for: A computational screen for alternative genetic codes in over 250,000 genomes
Source: eLife. 2021 Nov 9;10:e71402. doi: 10.7554/eLife.71402 (PMC8629427; doi:10.7554/eLife.71402)
Supplement: Figure 2—source data 3. [file elife-71402-fig2-data3.xlsx]

## Sheet: Sheet1
IVT control name	tRNA	IVT DNA template sequence (T7 promoter underlined)	Expected IVT product sequence	Expected size (nt)
S. malanga Leu tRNA(CAG) target	S. malanga Leu tRNA(CAG)	GATCTAATACGACTCACTATAGGGAGAGTTGGCATGGCGGAATTGTGGAATACGCGTCTGTTTCAGGAGCAGGTCTCCTAGGAGGTATGAGTTCGAGTCTCATTGTCAACA	GGGAGAGTTGGCATGGCGGAATTGTGGAATACGCGTCTGTTTCAGGAGCAGGTCTCCTAGGAGGTATGAGTTCGAGTCTCATTGTCAACA	90
S. malanga Leu tRNA(CAG) cross-hyb control	S. malanga Leu tRNA(CAA)	GATCTAATACGACTCACTATAGGGAGAGGACGTTTGGCCGAGTTGGTCTAAGGCGCCCGACTCAAGATCGGGTCTCATTCGAGGCGTGAGTTCGAATCTCACAGCGTCCA	GGGAGAGGACGTTTGGCCGAGTTGGTCTAAGGCGCCCGACTCAAGATCGGGTCTCATTCGAGGCGTGAGTTCGAATCTCACAGCGTCCA	89
S. malanga Ser tRNA(CAG) target	S. malanga Ser tRNA(CAG)	GATCTAATACGACTCACTATAGGGAGAGATACAGTGGCCGAGTTTGGTTAAGGCGCCGCCCACAGAAGGCGCTGGGATTTCCCTCGCAGGTTCGAATCCTGTCTGTATCG	GGGAGAGATACAGTGGCCGAGTTTGGTTAAGGCGCCGCCCACAGAAGGCGCTGGGATTTCCCTCGCAGGTTCGAATCCTGTCTGTATCG	89
S. malanga Ser tRNA(CAG) cross-hyb control	S. malanga Ser tRNA(GCU)	GATCTAATACGACTCACTATAGGGAGAGTTACAGTGGCCGAGTGGTTAAGGCGATGCCCTGCTAAGGCATTGGGTTTTACCTGCGCAGGTTCGAATCCTGTCTGTAACG	GGGAGAGTTACAGTGGCCGAGTGGTTAAGGCGATGCCCTGCTAAGGCATTGGGTTTTACCTGCGCAGGTTCGAATCCTGTCTGTAACG	88
