# Supplementary material for: A computational screen for alternative genetic codes in over 250,000 genomes
Source: eLife journal article supplement (doi:10.7554/elife.71402), 2021-11-08

# A

## GTDB phylogeny and species numbering

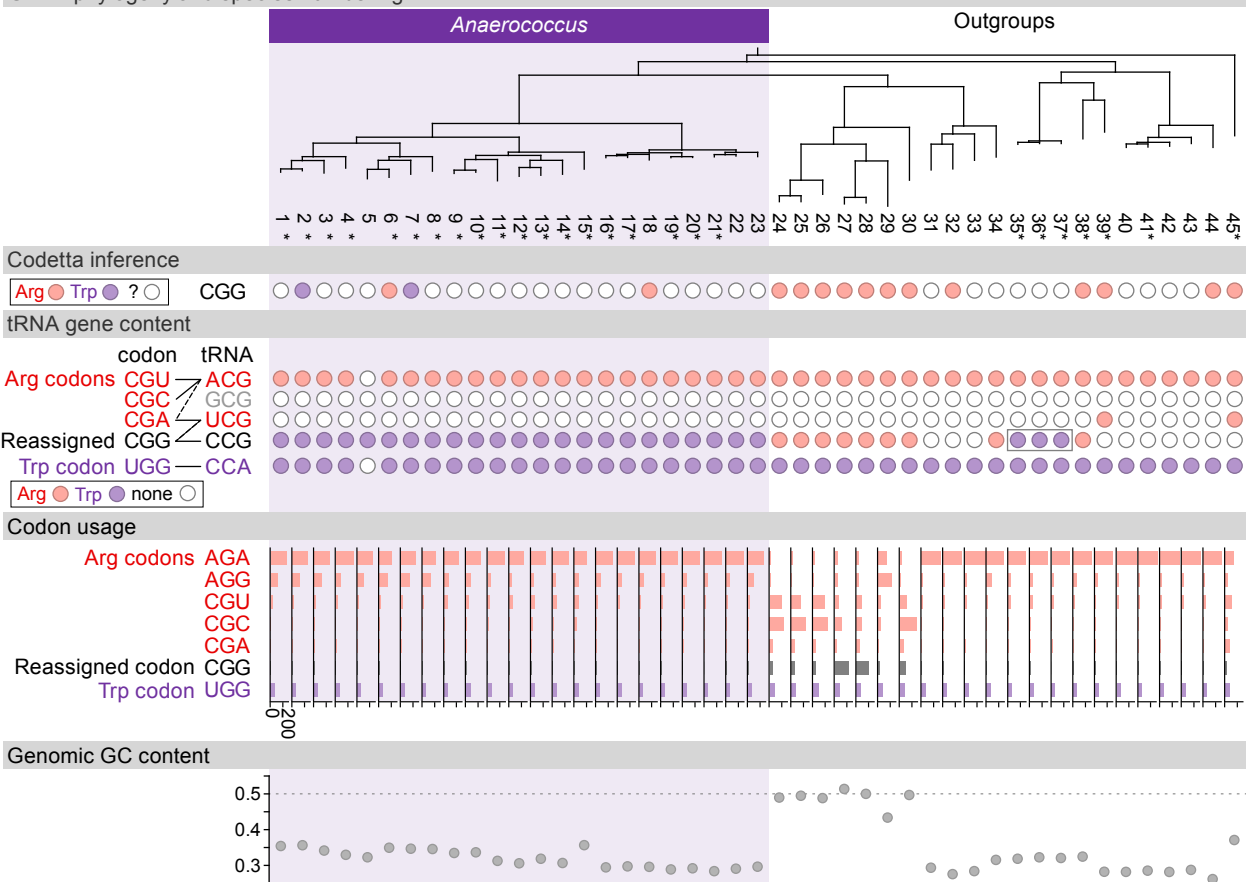

## B DNA ligase (POG091H024G)

*Anaerococcus*

```

1...KFEAEYTTTLLREVVVNVGRSGKVTSPAILDP...
3...KFEAEYTTTLLRKVVNVGRTGKVTSPAILDP...
4...KYAEAEFTTTLKEVVNVGRTGKVTSPAILDP...
5...KFEPEEFTTKLIDVVNVGRTGKVTSPAILDP...
11...KFEAEYTTTLLDVVNVGRTGKVTSPAILDP...
14...KFEAEYTTTLLDVVNVGRTGKVTSPAILDP...
15...KFEAEYTTTLLDVVNVGRTGKVTSPAILDP...
21...KYDPEEYTTKLLDVVNVGRTGKVTSPAILDP...
27...KFEAEVTTTLQAVEVNVGRTGKVTPIALLDP...
30...KFEAEVTTTLQAVEVNVGRTGKVTPTAQLDP...
39...KFEPEEYTTTLKEVVNVGRTGKVTPTAILEP...
41...KFEAEYSTILKEVVNVGRTGKVTPTAILEP...

```

**Outgroups**

## C *Anaerococcus* reassigned tRNA<sub>CCG</sub>

7. *Anaerococcus* sp. Marseille-P3915  
GCA\_900258475.1

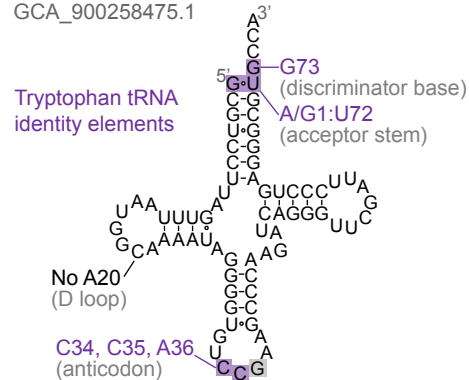

Supplement: supp [file elife-71402-supp-v1.zip]
