# Supplementary material for: A computational screen for alternative genetic codes in over 250,000 genomes
Source: eLife journal article supplement (doi:10.7554/elife.71402), 2021-11-08

# A

## GTDB phylogeny and species numbering

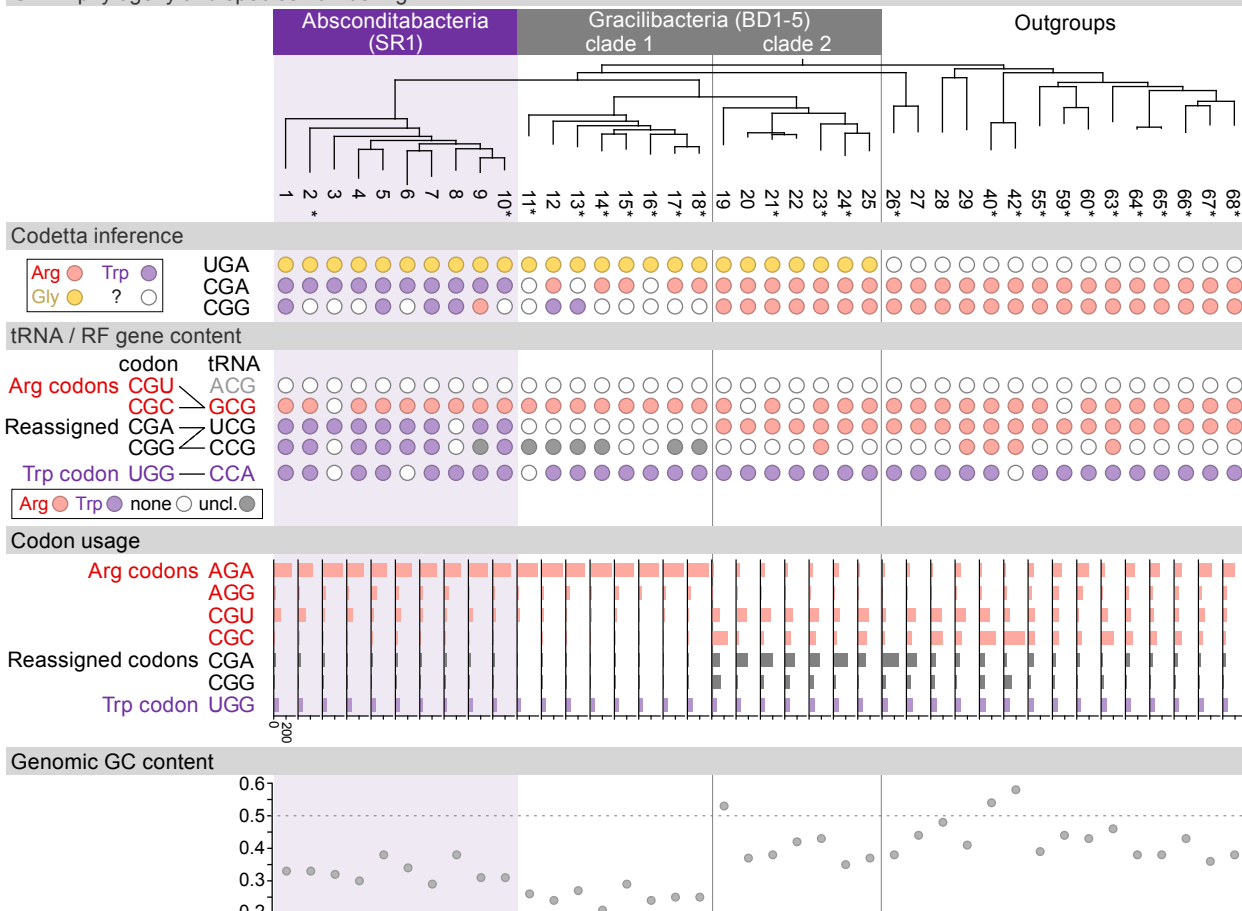

# B

## Undecaprenyl diphosphate synthase (POG091H00BZ)

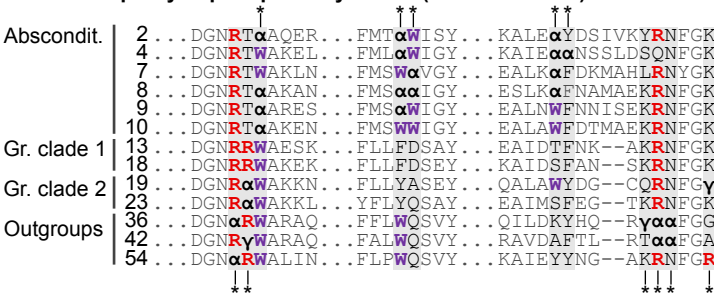

# Peptidase M50 (POG091H0131)

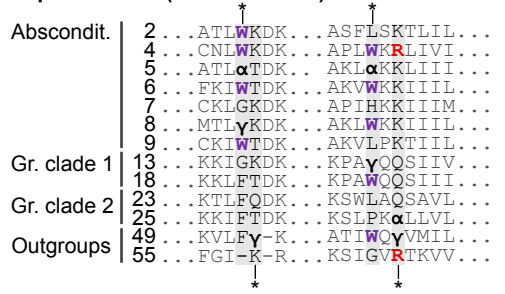

# C

## Absconditobacteria reassigned tRNA<sub>CGG</sub> & tRNA<sub>UGG</sub>

2. candidate division SR1 bacterium Aalborg\_AAW-1  
GCA\_001007975.1

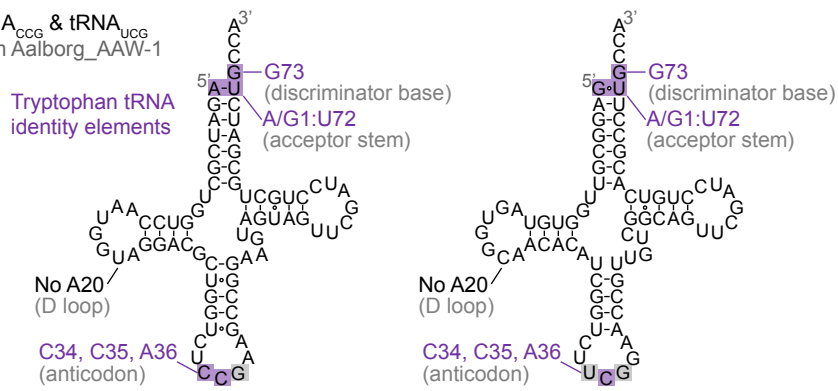

Supplement: supp [file elife-71402-supp-v1.zip]
