# Supplementary material for: A computational screen for alternative genetic codes in over 250,000 genomes
Source: eLife journal article supplement (doi:10.7554/elife.71402), 2021-11-08
Supplement: supp [file elife-71402-supp-v1.zip]

|                          |       |     |   |     |   |     |   |     |   |     |   |     |   |     |   |   |   |   |   |   |   |   |   |   |   |   |   |   |   |   |   |   |   |   |       |   |   |   |   |   |   |   |   |   |   |   |   |   |   |   |   |   |   |   |   |   |   |   |   |   |   |   |   |   |   |   |   |   |       |
|--------------------------|-------|-----|---|-----|---|-----|---|-----|---|-----|---|-----|---|-----|---|---|---|---|---|---|---|---|---|---|---|---|---|---|---|---|---|---|---|---|-------|---|---|---|---|---|---|---|---|---|---|---|---|---|---|---|---|---|---|---|---|---|---|---|---|---|---|---|---|---|---|---|---|---|-------|
|                          |       | 340 |   | 350 |   | 360 |   | 370 |   | 410 |   | 420 |   | 430 |   |   |   |   |   |   |   |   |   |   |   |   |   |   |   |   |   |   |   |   |       |   |   |   |   |   |   |   |   |   |   |   |   |   |   |   |   |   |   |   |   |   |   |   |   |   |   |   |   |   |   |   |   |   |       |
|                          |       | ▼   |   | ▼   |   | ▼   |   | ▼   |   | ▼   |   | ▼   |   | ▼   |   |   |   |   |   |   |   |   |   |   |   |   |   |   |   |   |   |   |   |   |       |   |   |   |   |   |   |   |   |   |   |   |   |   |   |   |   |   |   |   |   |   |   |   |   |   |   |   |   |   |   |   |   |   |       |
| <i>A. aeolicus</i> MetRS | . . . | A   | I | L   | N | R   | I | N   | G | E   | L | A   | N | E   | I | G | N | L | Y | S | R | V | V | N | M | A | H | K | F | L | G | G | E | V | . . . | L | K | F | T | S | Y | L | N | K | Y | V | D | E | K | Q | P | W | A | L | N | K | E | R | K | K | E | E | L | Q | K | V | L | Y | . . . |
| Outgroup MetRS           | . . . | Q   | F | I   | D | R   | L | N   | A | D   | L | A   | N | N   | Y | G | N | L | V | N | R | T | L | S | M | I | N | K | Y | F | N | G | V | I | . . . | M | E | L | V | N | L | G | N | K | Y | F | D | D | I | A | P | W | S | Q | A | K | N | G | N | T | V | L | L | A | E | C | L | Y | . . . |
| AGG→Met MetRS            | . . . | Q   | F | V   | D | R   | M | N   | A | D   | L | A   | N | T   | Y | G | N | L | V | N | R | A | L | S | M | I | K | K | Y | F | N | G | V | I | . . . | M | E | L | I | A | L | G | N | K | Y | F | D | D | I | A | P | W | S | Q | A | K | K | G | N | T | E | L | L | A | E | S | L | Y | . . . |
