# Supplementary material for: A computational screen for alternative genetic codes in over 250,000 genomes
Source: eLife journal article supplement (doi:10.7554/elife.71402), 2021-11-08

# A

## GTDB phylogeny and species numbering

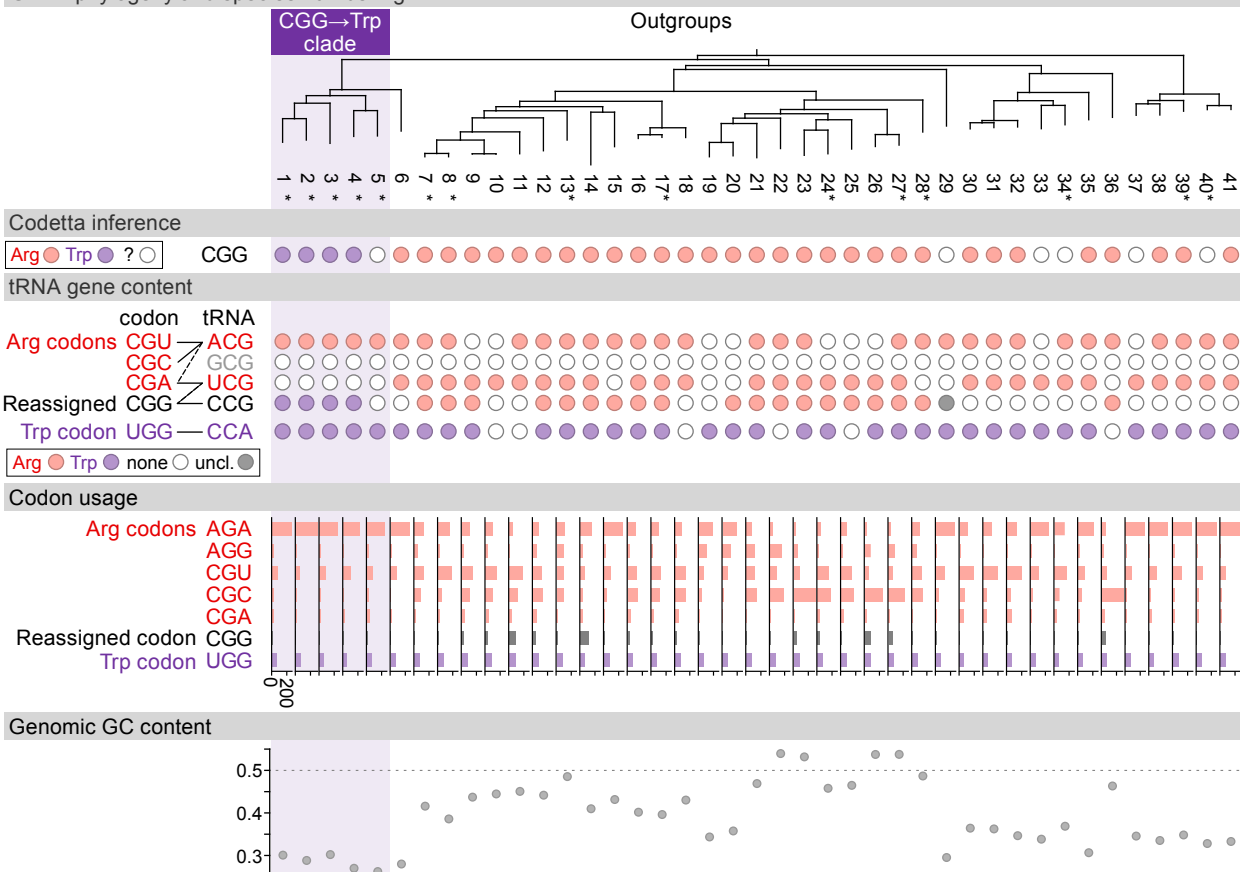

# B

## Adenylosuccinate synthase (POG091H01G9)

|           |    |                   |                  |
|-----------|----|-------------------|------------------|
| Bacilli   | 1  | ..VVVGSQWGDEGK... | YVTLPGWKEDISK... |
| CGG→Trp   | 2  | ..VVLGSQWGDEGK... | YKTFKGWTEDISK... |
| clade     | 3  | ..VIQGTQAGDEGK... | YKDFCGADEDISN... |
|           | 4  | ..LVLGSQWGDEGK... | YKTFKGWTEDISK... |
| Outgroups | 5  | ..VIEGSQWGDEGK... | YKEFKKFSFS-DK... |
|           | 6  | ..LVIGAQWGDEGK... | YKTFASWKEDISQ... |
|           | 7  | ..AIQGMQWGDEGK... | YIELPSWKEDISS... |
|           | 13 | ..AIOGSQWGDEGK... | YAIKFSWKEDISG... |
|           | 15 | ..AIEGMQWGDEGK... | YISLPSWKEDISH... |
|           | 28 | ..AIEGMQWGDEGK... | YKTLPGWKEDISN... |

## CTP synthase (POG091H02IX)

|           |    |                 |               |
|-----------|----|-----------------|---------------|
| Bacilli   | 1  | ..DMSDWVKLIE... | GFGKRGVEGK... |
| CGG→Trp   | 2  | ..NMDDWIDLIS... | GFGNRGIEGK... |
| clade     | 3  | ..NMDDAIKLID... | GFGNRGIEGK... |
|           | 4  | ..EMSDWNLIR...  | GFGNRGVEGK... |
| Outgroups | 5  | ..DMSDWQALIK... | GFGTRGTEGK... |
|           | 6  | ..DMDDWRHFVH... | GFGKRGIDGM... |
|           | 8  | ..DLHEWRSWCD... | GFGKRGSKGK... |
|           | 13 | ..DLRNWQKWCD... | GFGKRGSEGK... |
|           | 17 | ..DLHNWEKWVD... | GFGKRGTEGK... |
|           | 21 | ..QLVDYEEFVS... | GFGKRGTDGM... |

# C

## Bacilli CGG→Trp reassigned tRNA<sub>CCG</sub>

1. uncultured Mollicutes bacterium  
GCA\_900540395.1

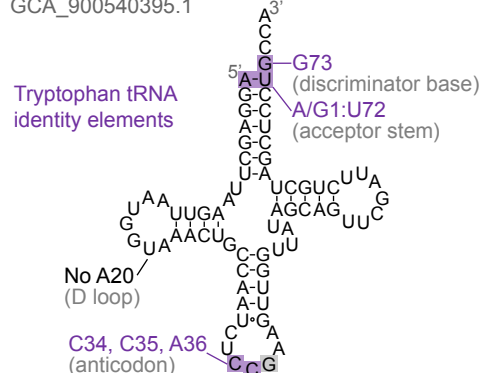

Supplement: supp [file elife-71402-supp-v1.zip]
