# Supplementary material for: A computational screen for alternative genetic codes in over 250,000 genomes
Source: eLife journal article supplement (doi:10.7554/elife.71402), 2021-11-08

## A

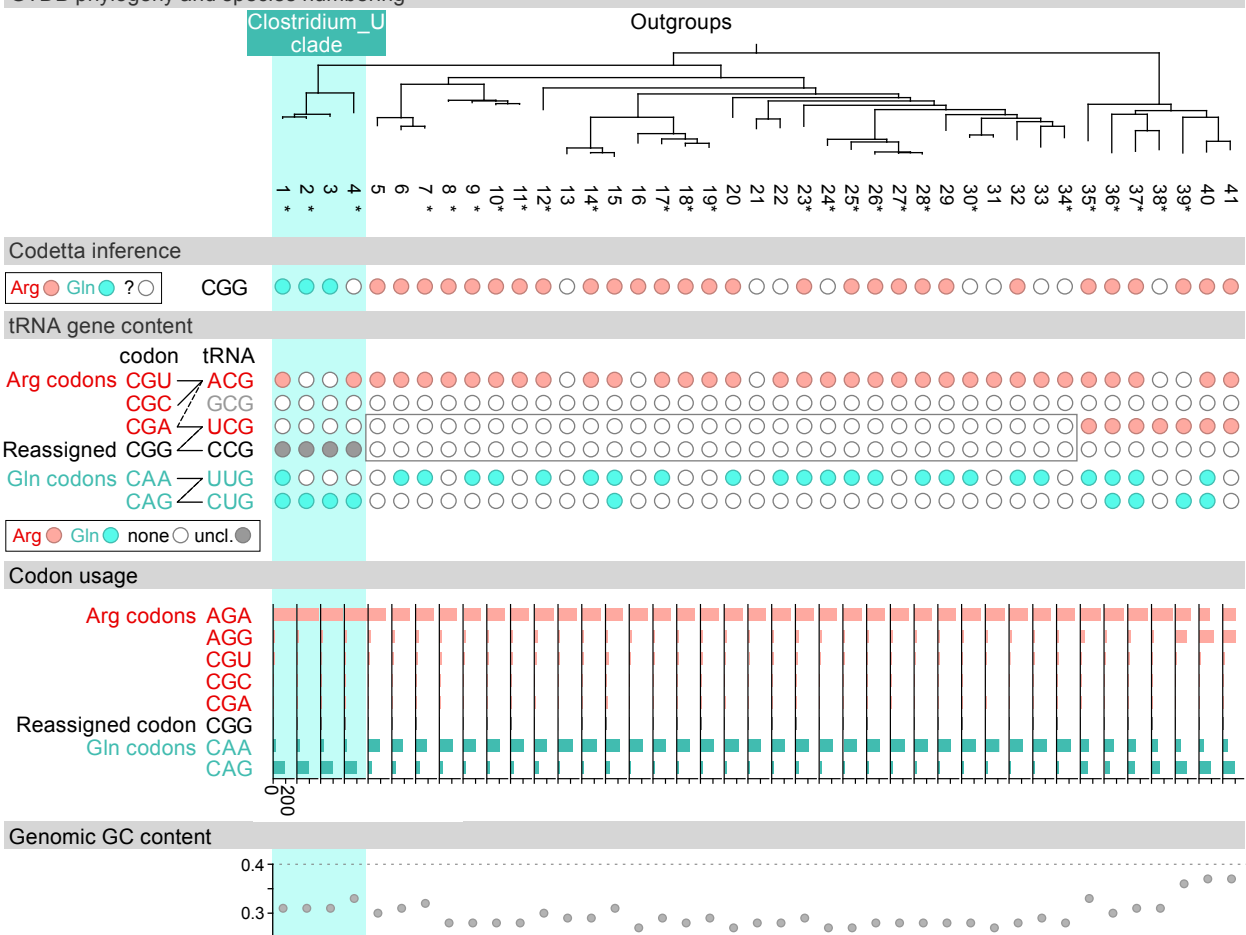

# B

**Transcription termination factor NusA (POG091H0124)**

|               |    |    |        |                                                                                     |         |      |       |                                                                                     |       |    |
|---------------|----|----|--------|-------------------------------------------------------------------------------------|---------|------|-------|-------------------------------------------------------------------------------------|-------|----|
| Clostridium_U | 1  | .. | KNFGQA |  | NVVEF   | FD.. | EGVMP |  | SEKID | .. |
|               | 2  | .. | KNFGQA |  | NVVEF   | FD.. | EGVMP |  | SEKID | .. |
|               | 3  | .. | KNFGQA |  | NVVEF   | FD.. | EGVMP |  | SEKID | .. |
|               | 4  | .. | KNFGQA |  | NVVEF   | FN.. | EGMT  |  | SEKID | .. |
| Outgroups     | 6  | .. | KNFGSA |  | NVRVEF  | FD.. | EGVMT |  | SEQIP | .. |
|               | 9  | .. | KNFGSA |  | NVRVEF  | FD.. | EGVMT |  | SEQIP | .. |
|               | 14 | .. | KNFGSA |  | NVRVSD  | ..   | EASMP |  | SEQIP | .. |
|               | 29 | .. | KNFGSA |  | NVRVEF  | FD.. | EAVMT |  | TEQMO | .. |
|               | 40 | .. | KNFGSA |  | NVRIDMN | ..   | EGVLL |  | SEQIR | .. |

**SsrA-binding protein (POG091H022D)**

|               |    |    |            |          |           |    |
|---------------|----|----|------------|----------|-----------|----|
| Clostridium_U | 1  | .. | LKGTEVKSIR | <b>α</b> | GRVNLKEG  | .. |
|               | 2  | .. | LKGTEVKSIR | <b>α</b> | GRVNLKEG  | .. |
|               | 3  | .. | LKGTEVKSIR | <b>α</b> | GRVNLKEG  | .. |
|               | 4  | .. | LKGTEVKSIR | <b>α</b> | GRVNLKEG  | .. |
| Outgroups     | 6  | .. | LKGTEVKSIR | <b>α</b> | GKVNLMKEG | .. |
|               | 14 | .. | LKGTEVKSIR | <b>α</b> | GKVNLMKEG | .. |
|               | 9  | .. | LKGTEVKSIR | <b>α</b> | GKVNLMKEG | .. |
|               | 14 | .. | LKGTEVKSIR | <b>α</b> | GKVNLMKEG | .. |
|               | 29 | .. | LKGTEVKSIR | <b>α</b> | GKVNLMKEG | .. |
|               | 40 | .. | LKGTEVKSIR | <b>α</b> | GKVNLMKEG | .. |

### C Clostridium\_U reassigned tRNA<sub>CCG</sub>

1. *Peptacetobacter hiranonis* DSM 13275  
GCA 000156055.1

## Glutamine tRNA identity elements

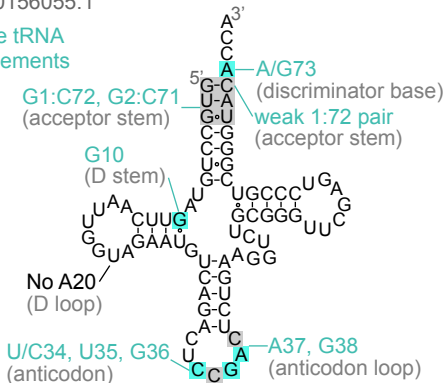

Supplement: supp [file elife-71402-supp-v1.zip]
