# Supplementary material for: A computational screen for alternative genetic codes in over 250,000 genomes
Source: eLife. 2021 Nov 9;10:e71402. doi: 10.7554/eLife.71402 (PMC8629427; doi:10.7554/eLife.71402)
Supplement: Supplementary file 2. [file elife-71402-supp2.xlsx]

## Sheet: SupplFile1_summary_spreadsheet_
row identifier	NCBI species taxid	domain of life	assembly	NCBI species name	selected for dereplicated dataset?	expected genetic code	Codetta inferred genetic code	# inconsistent codons	reassigned codon	expected amino acid	inferred amino acid	# Pfam consensus columns	total Pfam consensus columns	tRNA / RF in support	notes on tRNA/RF support	notes on phylogenetic relationships	Evidence of assembly contamination with alt gen code	notes on contamination	GC content	Additional notes
GCA_005878415.1-AGA	2026739	A	GCA_005878415.1	Euryarchaeota archaeon	FALSE	FFLLSSSSYY**CC*WLLLLPPPPHHQQRRRRIIIMTTTTNNKKSSRRVVVVAAAADDEEGGGG	FFLLSSSSYY??CC?WLLLLPPPPHHQQRRRRII?MTTTTNNKKSSKRVVVVAAAADDEEGGGG	1	AGA	R	K	77	156009	Missing	No tRNA(UCU)				0.66
GCA_902384955.1-TAG	115547	A	GCA_902384955.1	uncultured archaeon	FALSE	FFLLSSSSYY**CC*WLLLLPPPPHHQQRRRRIIIMTTTTNNKKSSRRVVVVAAAADDEEGGGG	FFLLSSSSYY?ECC?WLLLLPPPPHHQQRRRRIIIMTTTTNNKKSSRRVVVVAAAADDEEGGGG	1	TAG	*	E	10	156608	No	No tRNA(CUA) or tRNA(UUA), aRF1 exists
GCA_902769175.1-TGA	253161	A	GCA_902769175.1	uncultured Methanobrevibacter sp.	FALSE	FFLLSSSSYY**CC*WLLLLPPPPHHQQRRRRIIIMTTTTNNKKSSRRVVVVAAAADDEEGGGG	FFLLSSSSYY??CCGWLLLLPPPPHHQQRRRRIIIMTTTTNNKKSSRRVVVVAAAADDEEGGGG	1	TGA	*	G	5	180919	No	No tRNA(UCA), aRF1 exists
GCA_007116655.1-TGA	2026803	A	GCA_007116655.1	Candidatus Woesearchaeota archaeon	FALSE	FFLLSSSSYY**CC*WLLLLPPPPHHQQRRRRIIIMTTTTNNKKSSRRVVVVAAAADDEEGGGG	FFLLSSSSYY??CCGWLLLLPPPPHHQQRRRRIIIMTTTTNNKKSSRRVVVVAAAADDEEGGGG	1	TGA	*	G	13	51854	No	No tRNA(UCA), aRF1 exists		Yes	entire signal coming from T2SSE and T2SSF domains on a single contig. BLASTp search of T2SSF hit against NR-- top 16 best hits are Gracilibacteria, top hits is against NDK10072.1 (Gracilibacteria bacterium "type II secretion system F family protein")
GCA_000970065.1-TGA	2208	A	GCA_000970065.1	Methanosarcina barkeri 227	FALSE	FFLLSSSSYY**CC*WLLLLPPPPHHQQRRRRIIIMTTTTNNKKSSRRVVVVAAAADDEEGGGG	FFLLSSSSYY??CCWWLLLLPPPPHHQQRRRRIIIMTTTTNNKKSSRRVVVVAAAADDEEGGGG	1	TGA	*	W	4	348910	No	No tRNA(UCA), aRF1 exists	The 7 other assemblies for this species do not share the reassigment
GCA_000023985.1-TGA	83171	A	GCA_000023985.1	Methanocaldococcus fervens AG86	TRUE	FFLLSSSSYY**CC*WLLLLPPPPHHQQRRRRIIIMTTTTNNKKSSRRVVVVAAAADDEEGGGG	FFLLSSSSYY??CCWWLLLLPPPPHHQQR?RRIIIMTTTTNNKKSSRRVVVVAAAADDEEGGGG	1	TGA	*	W	3	180087	Unclear	A low scoring tRNA(UCA) of unclear isotype					only 2 aligned Pfam domains, almost entire signal coming from single short Rubredoxin hit.
GCA_001647085.1-TGA	1712654	A	GCA_001647085.1	Thermococcus piezophilus	TRUE	FFLLSSSSYY**CC*WLLLLPPPPHHQQRRRRIIIMTTTTNNKKSSRRVVVVAAAADDEEGGGG	FFLLSSSSYY??CCWWLLLLPPPPHHQQRRRRIIIMTTTTNNKKSSRRVVVVAAAADDEEGGGG	1	TGA	*	W	9	196322	No	No tRNA(UCA), aRF1 exists
GCA_003021725.1-TGA	1919162	A	GCA_003021725.1	Halobacteriales archaeon QH_8_64_26	TRUE	FFLLSSSSYY**CC*WLLLLPPPPHHQQRRRRIIIMTTTTNNKKSSRRVVVVAAAADDEEGGGG	FFLLSSSSYY??CCWWLLLLPPPPHHQQRRRRIIIMTTTTNNKKSSRRVVVVAAAADDEEGGGG	1	TGA	*	W	6	249427	No	No tRNA(UCA), aRF1 exists					only 6 aligned Pfam domains
GCA_003021705.1-TGA	1919172	A	GCA_003021705.1	Halobacteriales archaeon QS_3_64_16	TRUE	FFLLSSSSYY**CC*WLLLLPPPPHHQQRRRRIIIMTTTTNNKKSSRRVVVVAAAADDEEGGGG	FFLLSSSSYY??CCWWLLLLPPPPHHQQRRRRIIIMTTTTNNKKSSRRVVVVAAAADDEEGGGG	1	TGA	*	W	4	235747	No	No tRNA(UCA), aRF1 exists					only 4 aligned Pfam domains, most of the signal is coming from a single position in a gappy Glyco_hydro_15 alignment
GCA_003022925.1-TGA	1919186	A	GCA_003022925.1	Halobacteriales archaeon QS_8_65_32	TRUE	FFLLSSSSYY**CC*WLLLLPPPPHHQQRRRRIIIMTTTTNNKKSSRRVVVVAAAADDEEGGGG	FFLLSSSSYY??CCWWLLLLPPPPHHQQRRRRIIIMTTTTNNKKSSRRVVVVAAAADDEEGGGG	1	TGA	*	W	8	252849	Missing	No tRNA(UCA)					only 8 aligned Pfam domains
GCA_007050055.1-TGA	2200879	A	GCA_007050055.1	Sulfolobus sp. A20-N-G8	TRUE	FFLLSSSSYY**CC*WLLLLPPPPHHQQRRRRIIIMTTTTNNKKSSRRVVVVAAAADDEEGGGG	FFLLSSSSYY??CCWWLLLLPPPPHHQQRRRRIIIMTTTTNNKKSSRRVVVVAAAADDEEGGGG	1	TGA	*	W	76	164995	Yes	Contaminant: identical to Mycoplasma hyorhinis tRNA(UCA)		Yes	Extensive evidence of contamination with Mycoplasma contigs. Pfam positions aligned to TGAs across dozens of contigs. Took two Pfam hits with the greatest number of in-frame TGAs (BPD_transp_2 and Mycoplasma_p37), did BLASTp search against NR. Top hits were all Mycoplasma species, including a 100% identity hits to Mycoplasma hyorhinis WP_015084001.1 and WP_041363604.1, for each Pfam domain respec…
GCA_007050045.1-TGA	2200880	A	GCA_007050045.1	Sulfolobus sp. A20-N-F8	TRUE	FFLLSSSSYY**CC*WLLLLPPPPHHQQRRRRIIIMTTTTNNKKSSRRVVVVAAAADDEEGGGG	FFLLSSSSYY??CCWWLLLLPPPPHHQQRRRRIIIMTTTTNNKKSSRRVVVVAAAADDEEGGGG	1	TGA	*	W	218	251821	Yes	Contaminant: identical to Mycoplasma hyorhinis tRNA(UCA)		Yes	Extensive evidence of contamination with Mycoplasma contigs. Pfam positions aligned to TGAs across dozens of contigs. Took two Pfam hits with the greatest number of in-frame TGAs (BPD_transp_2 and tRNA-synt_1), did BLASTp search against NR. Top hits were all Mycoplasma species, including a 100% identity hits to Mycoplasma hyorhinis WP_015084001.1 and WP_014335319.1, for each Pfam domain respectiv…
GCA_007050065.1-TGA	2200881	A	GCA_007050065.1	Sulfolobus sp. A20-N-F6	TRUE	FFLLSSSSYY**CC*WLLLLPPPPHHQQRRRRIIIMTTTTNNKKSSRRVVVVAAAADDEEGGGG	FFLLSSSSYY??CCWWLLLLPPPPHHQQRRRRIIIMTTTTNNKKSSRRVVVVAAAADDEEGGGG	1	TGA	*	W	347	215023	Yes	Contaminant: identical to Mycoplasma hyorhinis tRNA(UCA)		Yes	Extensive evidence of contamination with Mycoplasma contigs. Pfam positions aligned to TGAs across dozens of contigs. Took two Pfam hits with the greatest number of in-frame TGAs (tRNA-synt_1 and BPD_transp_1), did BLASTp search against NR. Top hits were all Mycoplasma species, including a 100% identity hits to Mycoplasma hyorhinis WP_014335399.1 and WP_160602462.1, for each Pfam domain respectiv…
GCA_004944975.1-TGA	2559573	A	GCA_004944975.1	Halorhabdus sp. H27	TRUE	FFLLSSSSYY**CC*WLLLLPPPPHHQQRRRRIIIMTTTTNNKKSSRRVVVVAAAADDEEGGGG	FFLLSSSSYY??CCWWLLLLPPPPHHQQRRRRIIIMTTTTNNKKSSRRVVVVAAAADDEEGGGG	1	TGA	*	W	5	267059	Unclear	A low scoring tRNA(UCA) of unclear isotype					only 5 aligned Pfam domains
GCA_900142365.1-AGA	1848	B	GCA_900142365.1	Pseudonocardia thermophila	TRUE	FFLLSSSSYY**CC*WLLLLPPPPHHQQRRRRIIIMTTTTNNKKSSRRVVVVAAAADDEEGGGG	FF?LSSSSYY??CC?WLLLLPPPPHHQQRRRRIIIMTTTTNNKKSSKRVVVVAAAADDEEGGGG	1	AGA	R	K	62	464043	No	tRNA(UCU) appears to be arginine-type due to A20				0.73
GCA_000016185.1-AGA	34018	B	GCA_000016185.1	Rhodospirillum centenum SW	TRUE	FFLLSSSSYY**CC*WLLLLPPPPHHQQRRRRIIIMTTTTNNKKSSRRVVVVAAAADDEEGGGG	FFLLSSSSYY??CC?WLLLLPPPPHHQQRRRRIIIMTTTTNNKKSSKRVVVVAAAADDEEGGGG	1	AGA	R	K	73	406731	No	tRNA(UCU) appears to be arginine-type due to A20				0.7
GCA_002322615.1-AGA	40324	B	GCA_002322615.1	Stenotrophomonas maltophilia	FALSE	FFLLSSSSYY**CC*WLLLLPPPPHHQQRRRRIIIMTTTTNNKKSSRRVVVVAAAADDEEGGGG	FF?LSSSSYY??CC?WLLLLPPPPHHQQRRRRIIIMTTTTNNKKSSK?VVVVAAAADDEEGGGG	1	AGA	R	K	30	395200	No	tRNA(UCU) appears to be arginine-type due to A20				0.67
GCA_002799155.1-AGA	40324	B	GCA_002799155.1	Stenotrophomonas maltophilia	FALSE	FFLLSSSSYY**CC*WLLLLPPPPHHQQRRRRIIIMTTTTNNKKSSRRVVVVAAAADDEEGGGG	FF?LSSSSYY??CC?WLLLLPPPPHHQQRRRRIIIMTTTTNNKKSSKRVVVVAAAADDEEGGGG	1	AGA	R	K	40	444989	No	tRNA(UCU) appears to be arginine-type due to A20				0.67
GCA_009857175.1-AGA	40324	B	GCA_009857175.1	Stenotrophomonas maltophilia	FALSE	FFLLSSSSYY**CC*WLLLLPPPPHHQQRRRRIIIMTTTTNNKKSSRRVVVVAAAADDEEGGGG	FF?LSSSSYY??CC?WLLLLPPPPHHQQRRRRIIIMTTTTNNKKSSKRVVVVAAAADDEEGGGG	1	AGA	R	K	42	458455	No	tRNA(UCU) appears to be arginine-type due to A20				0.67
GCA_012956725.1-AGA	40324	B	GCA_012956725.1	Stenotrophomonas maltophilia	FALSE	FFLLSSSSYY**CC*WLLLLPPPPHHQQRRRRIIIMTTTTNNKKSSRRVVVVAAAADDEEGGGG	FF?LSSSSYY??CC?WLLLLPPPPHHQQRRRRIIIMTTTTNNKKSSKKVVVVAAAADDEEGGGG	2	AGA	R	K	35	454635	No	tRNA(UCU) appears to be arginine-type due to A20				0.67
GCA_012956765.1-AGA	40324	B	GCA_012956765.1	Stenotrophomonas maltophilia	FALSE	FFLLSSSSYY**CC*WLLLLPPPPHHQQRRRRIIIMTTTTNNKKSSRRVVVVAAAADDEEGGGG	FF?LSSSSYY??CC?WLLLLPPPPHHQQRRRRIIIMTTTTNNKKSSKKVVVVAAAADDEEGGGG	2	AGA	R	K	33	456776	No	tRNA(UCU) appears to be arginine-type due to A20				0.67
GCA_004322525.1-AGA	72226	B	GCA_004322525.1	Lysobacter sp.	TRUE	FFLLSSSSYY**CC*WLLLLPPPPHHQQRRRRIIIMTTTTNNKKSSRRVVVVAAAADDEEGGGG	FFLLSSSSYY??CC?WLLLLPPPPHHQQRRRRIIIMTTTTNNKKSSKKVVVVAAAADDEEGGGG	2	AGA	R	K	53	303730	No	tRNA(UCU) appears to be arginine-type due to A20				0.67
GCA_003491185.1-AGA	146919	B	GCA_003491185.1	Salinibacter ruber	FALSE	FFLLSSSSYY**CC*WLLLLPPPPHHQQRRRRIIIMTTTTNNKKSSRRVVVVAAAADDEEGGGG	FFLLSSSSYY??CC?WLLLLPPPPHHQQRRRRIIIMTTTTNNKKSSKRVVVVAAAADDEEGGGG	1	AGA	R	K	55	332107	Missing	No tRNA(UCU)				0.66
GCA_010093135.1-AGA	176598	B	GCA_010093135.1	Pseudoxanthomonas taiwanensis	TRUE	FFLLSSSSYY**CC*WLLLLPPPPHHQQRRRRIIIMTTTTNNKKSSRRVVVVAAAADDEEGGGG	FF?LSSSSYY??CC?WLLLLPPPPHHQQRRRRIIIMTTTTNNKKSSKKVVVVAAAADDEEGGGG	2	AGA	R	K	19	348509	No	tRNA(UCU) appears to be arginine-type due to A20				0.72
GCA_000025265.1-AGA	191495	B	GCA_000025265.1	Conexibacter woesei DSM 14684	TRUE	FFLLSSSSYY**CC*WLLLLPPPPHHQQRRRRIIIMTTTTNNKKSSRRVVVVAAAADDEEGGGG	FF?LSSSSYY??CC?WLL?LPPPPHHQQRRRRIIIMTTTTNNKKSSKKVVVVAAAADDEEGGGG	2	AGA	R	K	2349	455512	No	tRNA(UCU) appears to be arginine-type due to A20				0.73
GCA_000429065.1-AGA	265429	B	GCA_000429065.1	Silanimonas lenta DSM 16282	TRUE	FFLLSSSSYY**CC*WLLLLPPPPHHQQRRRRIIIMTTTTNNKKSSRRVVVVAAAADDEEGGGG	FF?LSSSSYY??CC?WLLLLPPPPHHQQRRRRII?MTTTTNNKKSSKKVVVVAAAADDEEGGGG	2	AGA	R	K	30	288627	No	tRNA(UCU) appears to be arginine-type due to A20				0.71
GCA_000378465.1-AGA	457934	B	GCA_000378465.1	Elioraea tepidiphila DSM 17972	TRUE	FFLLSSSSYY**CC*WLLLLPPPPHHQQRRRRIIIMTTTTNNKKSSRRVVVVAAAADDEEGGGG	FF?LSSSSYY??CC?WLLLLPPPPHHQQRRRRIIIMTTTTNNKKSSKKVVVVAAAADDEEGGGG	2	AGA	R	K	37	414909	No	tRNA(UCU) appears to be arginine-type due to A20				0.71
GCA_000284115.1-AGA	547188	B	GCA_000284115.1	Phycisphaera mikurensis NBRC 102666	TRUE	FFLLSSSSYY**CC*WLLLLPPPPHHQQRRRRIIIMTTTTNNKKSSRRVVVVAAAADDEEGGGG	FF?LSSSSYY??CC?WLLLLPPPPHHQQRRRRII?MTTTTNNKKSSKRVVVVAAAADDEEGGGG	1	AGA	R	K	101	237968	No	tRNA(UCU) appears to be arginine-type due to A20				0.73
GCA_900142415.1-AGA	633813	B	GCA_900142415.1	Rhodothermus profundi	TRUE	FFLLSSSSYY**CC*WLLLLPPPPHHQQRRRRIIIMTTTTNNKKSSRRVVVVAAAADDEEGGGG	FFLLSSSSYY??CC?WLLLLPPPPHHQQRRRRIIIMTTTTNNKKSSKKVVVVAAAADDEEGGGG	2	AGA	R	K	191	324115	No	tRNA(UCU) appears to be arginine-type due to A20				0.59
GCA_900113085.1-AGA	1076937	B	GCA_900113085.1	Fontimonas thermophila	TRUE	FFLLSSSSYY**CC*WLLLLPPPPHHQQRRRRIIIMTTTTNNKKSSRRVVVVAAAADDEEGGGG	FFLLSSSSYY??CC?WLLLLPPPPHHQQRRRRIIIMTTTTNNKKSSKKVVVVAAAADDEEGGGG	2	AGA	R	K	156	327738	No	tRNA(UCU) appears to be arginine-type due to A20				0.65
GCA_000482925.1-AGA	1286837	B	GCA_000482925.1	Variovorax sp. JGI 0001016-C20	TRUE	FFLLSSSSYY**CC*WLLLLPPPPHHQQRRRRIIIMTTTTNNKKSSRRVVVVAAAADDEEGGGG	FF?LSSSSYY??CC?WLLLLPPPPHHQQRRRRIIIMTTTTNNKKSSKRVVVVAAAADDEEGGGG	1	AGA	R	K	27	84813	Missing	No tRNA(UCU)				0.66
GCA_900102425.1-AGA	1550231	B	GCA_900102425.1	Blastococcus sp. DSM 44268	TRUE	FFLLSSSSYY**CC*WLLLLPPPPHHQQRRRRIIIMTTTTNNKKSSRRVVVVAAAADDEEGGGG	FF?LSSSSYY??CC?WLLLLPPPPHHQQRRRRII?MTTTTNNKKSSKRVVVVAAAADDEEGGGG	1	AGA	R	K	21	326570	No	tRNA(UCU) appears to be arginine-type due to A20				0.74
GCA_001518995.2-AGA	1779382	B	GCA_001518995.2	Rhodothermaceae bacterium RA	TRUE	FFLLSSSSYY**CC*WLLLLPPPPHHQQRRRRIIIMTTTTNNKKSSRRVVVVAAAADDEEGGGG	FFLLSSSSYY??CC?WLLLLPPPPHHQQRRRRIIIMTTTTNNKKSSKKVVVVAAAADDEEGGGG	2	AGA	R	K	60	368667	No	tRNA(UCU) appears to be arginine-type due to A20				0.68
GCA_001820755.1-AGA	1802281	B	GCA_001820755.1	Candidatus Sungbacteria bacterium RIFCSPLOWO2_01_FULL_60_25	TRUE	FFLLSSSSYY**CC*WLLLLPPPPHHQQRRRRIIIMTTTTNNKKSSRRVVVVAAAADDEEGGGG	FFLLSSSSYY??CC?WLLLLPPPPHHQQRRRRIIIMTTTTNNKKSSKRVVVVAAAADDEEGGGG	1	AGA	R	K	84	57895	Missing	No tRNA(UCU)				0.6
GCA_001920645.1-AGA	1805058	B	GCA_001920645.1	Chloroflexi bacterium 13_1_20CM_2_70_9	TRUE	FFLLSSSSYY**CC*WLLLLPPPPHHQQRRRRIIIMTTTTNNKKSSRRVVVVAAAADDEEGGGG	FF?LSSSSYY??CC?WLLLLPPPPHHQQRRRRIIIMTTTTNNKKSSKKVVVVAAAADDEEGGGG	2	AGA	R	K	62	163505	No	tRNA(UCU) appears to be arginine-type due to A20				0.7
GCA_001919195.1-AGA	1805070	B	GCA_001919195.1	Chloroflexi bacterium 13_1_40CM_2_70_6	TRUE	FFLLSSSSYY**CC*WLLLLPPPPHHQQRRRRIIIMTTTTNNKKSSRRVVVVAAAADDEEGGGG	FFLLSSSSYY??CC?WLLLLPPPPHHQQRRRRIIIMTTTTNNKKSSK?VVVVAAAADDEEGGGG	1	AGA	R	K	64	172054	No	tRNA(UCU) appears to be arginine-type due to A20				0.7
GCA_001917745.1-AGA	1805083	B	GCA_001917745.1	Chloroflexi bacterium 13_1_40CM_68_15	TRUE	FFLLSSSSYY**CC*WLLLLPPPPHHQQRRRRIIIMTTTTNNKKSSRRVVVVAAAADDEEGGGG	FFLLSSSSYY??CC?WLLLLPPPPHHQQRRRRIIIMTTTTNNKKSSKRVVVVAAAADDEEGGGG	1	AGA	R	K	19	50299	Missing	No tRNA(UCU)				0.69
GCA_013202195.1-AGA	1869227	B	GCA_013202195.1	bacterium	FALSE	FFLLSSSSYY**CC*WLLLLPPPPHHQQRRRRIIIMTTTTNNKKSSRRVVVVAAAADDEEGGGG	FFLLSSSSYY??CC?WLLLLPPPPHHQQRRRRIIIMTTTTNNKKSSKRVVVVAAAADDEEGGGG	1	AGA	R	K	123	240873	No	tRNA(UCU) appears to be arginine-type due to A20				0.66
GCA_003820645.1-AGA	1891241	B	GCA_003820645.1	Betaproteobacteria bacterium	FALSE	FFLLSSSSYY**CC*WLLLLPPPPHHQQRRRRIIIMTTTTNNKKSSRRVVVVAAAADDEEGGGG	FFLLSSSSYY??CC?WLLLLPPPPHHQQRRRRIIIMTTTTNNKKSSKKVVVVAAAADDEEGGGG	2	AGA	R	K	308	428078	No	tRNA(UCU) appears to be arginine-type due to A20				0.63
GCA_003696175.1-AGA	1898104	B	GCA_003696175.1	Bacteroidetes bacterium	FALSE	FFLLSSSSYY**CC*WLLLLPPPPHHQQRRRRIIIMTTTTNNKKSSRRVVVVAAAADDEEGGGG	FFLLSSSSYY??CC?WLLLLPPPPHHQQRRRRIIIMTTTTNNKKSSK?VVVVAAAADDEEGGGG	1	AGA	R	K	56	404243	No	tRNA(UCU) appears to be arginine-type due to A20				0.69
GCA_003693905.1-AGA	1913988	B	GCA_003693905.1	Alphaproteobacteria bacterium	FALSE	FFLLSSSSYY**CC*WLLLLPPPPHHQQRRRRIIIMTTTTNNKKSSRRVVVVAAAADDEEGGGG	FFLLSSSSYY??CC?WLLLLPPPPHHQQRRRRIIIMTTTTNNKKSSKKVVVVAAAADDEEGGGG	2	AGA	R	K	150	285638	No	tRNA(UCU) appears to be arginine-type due to A20				0.66
GCA_005792365.1-AGA	1913988	B	GCA_005792365.1	Alphaproteobacteria bacterium	FALSE	FFLLSSSSYY**CC*WLLLLPPPPHHQQRRRRIIIMTTTTNNKKSSRRVVVVAAAADDEEGGGG	FFLLSSSSYY??CC?WLLLLPPPPHHQQRRRRIIIMTTTTNNKKSSKKVVVVAAAADDEEGGGG	2	AGA	R	K	26	76809	Missing	No tRNA(UCU)				0.69
GCA_012273875.1-AGA	1913988	B	GCA_012273875.1	Alphaproteobacteria bacterium	FALSE	FFLLSSSSYY**CC*WLLLLPPPPHHQQRRRRIIIMTTTTNNKKSSRRVVVVAAAADDEEGGGG	FF?LSSSSYY??CC?WLLLLPPPPHHQQRRRRIIIMTTTTNNKKSSKRVVVVAAAADDEEGGGG	1	AGA	R	K	28	82146	No	tRNA(UCU) appears to be arginine-type due to A20				0.68
GCA_003023265.1-AGA	1919106	B	GCA_003023265.1	Bacteroidetes bacterium QS_4_64_154	TRUE	FFLLSSSSYY**CC*WLLLLPPPPHHQQRRRRIIIMTTTTNNKKSSRRVVVVAAAADDEEGGGG	FFLLSSSSYY??CC?WLLLLPPPPHHQQRRRRIIIMTTTTNNKKSSK?VVVVAAAADDEEGGGG	1	AGA	R	K	46	134863	Missing	No tRNA(UCU)				0.64
GCA_002686175.1-AGA	1930536	B	GCA_002686175.1	Sphingomonadaceae bacterium	FALSE	FFLLSSSSYY**CC*WLLLLPPPPHHQQRRRRIIIMTTTTNNKKSSRRVVVVAAAADDEEGGGG	FFLLSSSSYY??CC?WLLLLPPPPHHQQRRRRIIIMTTTTNNKKSSKRVVVVAAAADDEEGGGG	1	AGA	R	K	78	286213	No	tRNA(UCU) appears to be arginine-type due to A20				0.65
GCA_002423245.1-AGA	1952809	B	GCA_002423245.1	Rhodobacteraceae bacterium UBA6141	TRUE	FFLLSSSSYY**CC*WLLLLPPPPHHQQRRRRIIIMTTTTNNKKSSRRVVVVAAAADDEEGGGG	FF?LSSSSYY??CC?WLLLLPPPPHHQQRRRRIIIMTTTTNNKKSSKKVVVVAAAADDEEGGGG	2	AGA	R	K	99	333561	No	tRNA(UCU) appears to be arginine-type due to A20				0.69
GCA_003576765.1-AGA	1977087	B	GCA_003576765.1	Proteobacteria bacterium	FALSE	FFLLSSSSYY**CC*WLLLLPPPPHHQQRRRRIIIMTTTTNNKKSSRRVVVVAAAADDEEGGGG	FFLLSSSSYY??CC?WLLLLPPPPHHQQRRRRIIIMTTTTNNKKSSK?VVVVAAAADDEEGGGG	1	AGA	R	K	75	283294	No	tRNA(UCU) appears to be arginine-type due to A20				0.67
GCA_011055645.1-AGA	1978231	B	GCA_011055645.1	Acidobacteria bacterium	FALSE	FFLLSSSSYY**CC*WLLLLPPPPHHQQRRRRIIIMTTTTNNKKSSRRVVVVAAAADDEEGGGG	FF?LSSSSYY??CC?WLLLLPPPPHHQQRRRRIIIMTTTTNNKKSSK?VVVVAAAADDEEGGGG	1	AGA	R	K	33	114124	Missing	No tRNA(UCU)				0.68
GCA_011525905.1-AGA	1978231	B	GCA_011525905.1	Acidobacteria bacterium	FALSE	FFLLSSSSYY**CC*WLLLLPPPPHHQQRRRRIIIMTTTTNNKKSSRRVVVVAAAADDEEGGGG	FF?LSSSSYY??CC?WLLLLPPPPHHQQRRRRII?MTTTTNNKKSSKRVVVVAAAADDEEGGGG	1	AGA	R	K	82	343255	No	tRNA(UCU) appears to be arginine-type due to A20				0.73
GCA_002192255.1-AGA	2005046	B	GCA_002192255.1	Stenotrophomonas sp. WZN-1	TRUE	FFLLSSSSYY**CC*WLLLLPPPPHHQQRRRRIIIMTTTTNNKKSSRRVVVVAAAADDEEGGGG	FFLLSSSSYY??CC?WLLLLPPPPHHQQRRRRIIIMTTTTNNKKSSKKVVVVAAAADDEEGGGG	2	AGA	R	K	35	446229	No	tRNA(UCU) appears to be arginine-type due to A20				0.67
GCA_005792355.1-AGA	2006848	B	GCA_005792355.1	Opitutaceae bacterium	FALSE	FFLLSSSSYY**CC*WLLLLPPPPHHQQRRRRIIIMTTTTNNKKSSRRVVVVAAAADDEEGGGG	FFLLSSSSYY??CC?WLLLLPPPPHHQQRRRRIIIMTTTTNNKKSSKRVVVVAAAADDEEGGGG	1	AGA	R	K	241	541336	No	tRNA(UCU) appears to be arginine-type due to A20				0.65
GCA_005798185.1-AGA	2006848	B	GCA_005798185.1	Opitutaceae bacterium	FALSE	FFLLSSSSYY**CC*WLLLLPPPPHHQQRRRRIIIMTTTTNNKKSSRRVVVVAAAADDEEGGGG	FFLLSSSSYY??CC?WLLLLPPPPHHQQRRRRIIIMTTTTNNKKSSKRVVVVAAAADDEEGGGG	1	AGA	R	K	43	102020	Missing	No tRNA(UCU)				0.66
GCA_003962905.1-AGA	2006849	B	GCA_003962905.1	Xanthomonadales bacterium	FALSE	FFLLSSSSYY**CC*WLLLLPPPPHHQQRRRRIIIMTTTTNNKKSSRRVVVVAAAADDEEGGGG	FFLLSSSSYY??CC?WLLLLPPPPHHQQRRRRIIIMTTTTNNKKSSKKVVVVAAAADDEEGGGG	2	AGA	R	K	51	352319	No	tRNA(UCU) appears to be arginine-type due to A20				0.7
GCA_003696945.1-AGA	2026724	B	GCA_003696945.1	Chloroflexi bacterium	FALSE	FFLLSSSSYY**CC*WLLLLPPPPHHQQRRRRIIIMTTTTNNKKSSRRVVVVAAAADDEEGGGG	FFLLSSSSYY??CC?WLLLLPPPPHHQQRRRRIIIMTTTTNNKKSSKKVVVVAAAADDEEGGGG	2	AGA	R	K	115	312086	No	tRNA(UCU) appears to be arginine-type due to A20				0.64
GCA_005883525.1-AGA	2026724	B	GCA_005883525.1	Chloroflexi bacterium	FALSE	FFLLSSSSYY**CC*WLLLLPPPPHHQQRRRRIIIMTTTTNNKKSSRRVVVVAAAADDEEGGGG	FF?LSSSSYY??CC?WLLLLPPPPHHQQRRRRIIIMTTTTNNKKSSKRVVVVAAAADDEEGGGG	1	AGA	R	K	109	266621	No	tRNA(UCU) appears to be arginine-type due to A20				0.71
GCA_005889515.1-AGA	2026724	B	GCA_005889515.1	Chloroflexi bacterium	FALSE	FFLLSSSSYY**CC*WLLLLPPPPHHQQRRRRIIIMTTTTNNKKSSRRVVVVAAAADDEEGGGG	FF?LSSSSYY??CC?WLLLLPPPPHHQQRRRRII?MTTTTNNKKSSKRVVVVAAAADDEEGGGG	1	AGA	R	K	64	336323	Missing	No tRNA(UCU)				0.73
GCA_011048175.1-AGA	2026724	B	GCA_011048175.1	Chloroflexi bacterium	FALSE	FFLLSSSSYY**CC*WLLLLPPPPHHQQRRRRIIIMTTTTNNKKSSRRVVVVAAAADDEEGGGG	FFLLSSSSYY??CC?WLLLLPPPPHHQQRRRRIIIMTTTTNNKKSSKKVVVVAAAADDEEGGGG	2	AGA	R	K	173	346883	No	tRNA(UCU) appears to be arginine-type due to A20				0.64
GCA_011051245.1-AGA	2026724	B	GCA_011051245.1	Chloroflexi bacterium	FALSE	FFLLSSSSYY**CC*WLLLLPPPPHHQQRRRRIIIMTTTTNNKKSSRRVVVVAAAADDEEGGGG	FFLLSSSSYY??CC?WLLLLPPPPHHQQRRRRIIIMTTTTNNKKSSKKVVVVAAAADDEEGGGG	2	AGA	R	K	208	472290	No	tRNA(UCU) appears to be arginine-type due to A20				0.65
GCA_011053965.1-AGA	2026724	B	GCA_011053965.1	Chloroflexi bacterium	FALSE	FFLLSSSSYY**CC*WLLLLPPPPHHQQRRRRIIIMTTTTNNKKSSRRVVVVAAAADDEEGGGG	FFLLSSSSYY??CC?WLLLLPPPPHHQQRRRRIIIMTTTTNNKKSSKKVVVVAAAADDEEGGGG	2	AGA	R	K	185	442534	No	tRNA(UCU) appears to be arginine-type due to A20				0.65
GCA_011054785.1-AGA	2026724	B	GCA_011054785.1	Chloroflexi bacterium	FALSE	FFLLSSSSYY**CC*WLLLLPPPPHHQQRRRRIIIMTTTTNNKKSSRRVVVVAAAADDEEGGGG	FFLLSSSSYY??CC?WLLLLPPPPHHQQRRRRIIIMTTTTNNKKSSKKVVVVAAAADDEEGGGG	2	AGA	R	K	163	356277	No	tRNA(UCU) appears to be arginine-type due to A20				0.64
GCA_011055045.1-AGA	2026724	B	GCA_011055045.1	Chloroflexi bacterium	FALSE	FFLLSSSSYY**CC*WLLLLPPPPHHQQRRRRIIIMTTTTNNKKSSRRVVVVAAAADDEEGGGG	FFLLSSSSYY??CC?WLLLLPPPPHHQQRRRRIIIMTTTTNNKKSSKKVVVVAAAADDEEGGGG	2	AGA	R	K	117	266947	No	tRNA(UCU) appears to be arginine-type due to A20				0.64
GCA_011055185.1-AGA	2026724	B	GCA_011055185.1	Chloroflexi bacterium	FALSE	FFLLSSSSYY**CC*WLLLLPPPPHHQQRRRRIIIMTTTTNNKKSSRRVVVVAAAADDEEGGGG	FFLLSSSSYY??CC?WLLLLPPPPHHQQRRRRIIIMTTTTNNKKSSKKVVVVAAAADDEEGGGG	2	AGA	R	K	185	444554	No	tRNA(UCU) appears to be arginine-type due to A20				0.65
GCA_011057365.1-AGA	2026724	B	GCA_011057365.1	Chloroflexi bacterium	FALSE	FFLLSSSSYY**CC*WLLLLPPPPHHQQRRRRIIIMTTTTNNKKSSRRVVVVAAAADDEEGGGG	FFLLSSSSYY??CC?WLLLLPPPPHHQQRRRRIIIMTTTTNNKKSSKKVVVVAAAADDEEGGGG	2	AGA	R	K	43	167912	No	tRNA(UCU) appears to be arginine-type due to A20				0.69
GCA_007118095.1-AGA	2026734	B	GCA_007118095.1	Dehalococcoidia bacterium	FALSE	FFLLSSSSYY**CC*WLLLLPPPPHHQQRRRRIIIMTTTTNNKKSSRRVVVVAAAADDEEGGGG	FFLLSSSSYY??CC?WLLLLPPPPHHQQRRRRIIIMTTTTNNKKSSKRVVVVAAAADDEEGGGG	1	AGA	R	K	80	331640	No	tRNA(UCU) appears to be arginine-type due to A20				0.65
GCA_007127275.1-AGA	2026780	B	GCA_007127275.1	Planctomycetes bacterium	FALSE	FFLLSSSSYY**CC*WLLLLPPPPHHQQRRRRIIIMTTTTNNKKSSRRVVVVAAAADDEEGGGG	FFLLSSSSYY??CC?WLLLLPPPPHHQQRRRRIIIMTTTTNNKKSSKRVVVVAAAADDEEGGGG	1	AGA	R	K	36	192612	Missing	No tRNA(UCU)				0.65
GCA_013140785.1-AGA	2026780	B	GCA_013140785.1	Planctomycetes bacterium	FALSE	FFLLSSSSYY**CC*WLLLLPPPPHHQQRRRRIIIMTTTTNNKKSSRRVVVVAAAADDEEGGGG	FF?LSSSSYY??CC?WLLLLPPPPHHQQRRRRIIIMTTTTNNKKSSKRVVVVAAAADDEEGGGG	1	AGA	R	K	88	270119	No	tRNA(UCU) appears to be arginine-type due to A20				0.7
GCA_011374075.1-AGA	2026799	B	GCA_011374075.1	Verrucomicrobia bacterium	FALSE	FFLLSSSSYY**CC*WLLLLPPPPHHQQRRRRIIIMTTTTNNKKSSRRVVVVAAAADDEEGGGG	FFLLSSSSYY??CC?WLLLLPPPPHHQQRRRRIIIMTTTTNNKKSSKKVVVVAAAADDEEGGGG	2	AGA	R	K	69	254258	No	tRNA(UCU) appears to be arginine-type due to A20				0.63
GCA_002898295.1-AGA	2035416	B	GCA_002898295.1	bacterium HR21	TRUE	FFLLSSSSYY**CC*WLLLLPPPPHHQQRRRRIIIMTTTTNNKKSSRRVVVVAAAADDEEGGGG	FFLLSSSSYY??CC?WLLLLPPPPHHQQRRRRIIIMTTTTNNKKSSK?VVVVAAAADDEEGGGG	1	AGA	R	K	114	182593	No	tRNA(UCU) appears to be arginine-type due to A20				0.62
GCA_011176535.1-AGA	2052143	B	GCA_011176535.1	Anaerolineae bacterium	FALSE	FFLLSSSSYY**CC*WLLLLPPPPHHQQRRRRIIIMTTTTNNKKSSRRVVVVAAAADDEEGGGG	FFLLSSSSYY??CC?WLLLLPPPPHHQQRRRRIIIMTTTTNNKKSSKKVVVVAAAADDEEGGGG	2	AGA	R	K	60	248009	No	tRNA(UCU) appears to be arginine-type due to A20				0.64
GCA_011370595.1-AGA	2052143	B	GCA_011370595.1	Anaerolineae bacterium	FALSE	FFLLSSSSYY**CC*WLLLLPPPPHHQQRRRRIIIMTTTTNNKKSSRRVVVVAAAADDEEGGGG	FFLLSSSSYY??CC?WLLLLPPPPHHQQRRRRIIIMTTTTNNKKSSKKVVVVAAAADDEEGGGG	2	AGA	R	K	229	236384	No	tRNA(UCU) appears to be arginine-type due to A20				0.59
GCA_011047965.1-AGA	2052146	B	GCA_011047965.1	Blastocatellia bacterium	FALSE	FFLLSSSSYY**CC*WLLLLPPPPHHQQRRRRIIIMTTTTNNKKSSRRVVVVAAAADDEEGGGG	FFLLSSSSYY??CC?WLLLLPPPPHHQQRRRRIIIMTTTTNNKKSSK?VVVVAAAADDEEGGGG	1	AGA	R	K	221	310897	No	tRNA(UCU) appears to be arginine-type due to A20				0.64
GCA_011056365.1-AGA	2052146	B	GCA_011056365.1	Blastocatellia bacterium	FALSE	FFLLSSSSYY**CC*WLLLLPPPPHHQQRRRRIIIMTTTTNNKKSSRRVVVVAAAADDEEGGGG	FFLLSSSSYY??CC?WLLLLPPPPHHQQRRRRIIIMTTTTNNKKSSK?VVVVAAAADDEEGGGG	1	AGA	R	K	215	307982	No	tRNA(UCU) appears to be arginine-type due to A20				0.64
GCA_011058595.1-AGA	2052146	B	GCA_011058595.1	Blastocatellia bacterium	FALSE	FFLLSSSSYY**CC*WLLLLPPPPHHQQRRRRIIIMTTTTNNKKSSRRVVVVAAAADDEEGGGG	FFLLSSSSYY??CC?WLLLLPPPPHHQQRRRRIIIMTTTTNNKKSSK?VVVVAAAADDEEGGGG	1	AGA	R	K	215	307136	No	tRNA(UCU) appears to be arginine-type due to A20				0.64
GCA_011357895.1-AGA	2052164	B	GCA_011357895.1	Gemmataceae bacterium	FALSE	FFLLSSSSYY**CC*WLLLLPPPPHHQQRRRRIIIMTTTTNNKKSSRRVVVVAAAADDEEGGGG	FFLLSSSSYY??CC?WLLLLPPPPHHQQRRRRIIIMTTTTNNKKSSKRVVVVAAAADDEEGGGG	1	AGA	R	K	134	259481	Missing	No tRNA(UCU)				0.6
GCA_012961905.1-AGA	2073117	B	GCA_012961905.1	Anaerolineales bacterium	FALSE	FFLLSSSSYY**CC*WLLLLPPPPHHQQRRRRIIIMTTTTNNKKSSRRVVVVAAAADDEEGGGG	FFLLSSSSYY??CC?WLLLLPPPPHHQQRRRRIIIMTTTTNNKKSSKKVVVVAAAADDEEGGGG	2	AGA	R	K	61	257600	No	tRNA(UCU) appears to be arginine-type due to A20				0.64
GCA_003105135.1-AGA	2170735	B	GCA_003105135.1	Stenotrophomonas sp. SPM	TRUE	FFLLSSSSYY**CC*WLLLLPPPPHHQQRRRRIIIMTTTTNNKKSSRRVVVVAAAADDEEGGGG	FF?LSSSSYY??CC?WLLLLPPPPHHQQRRRRIIIMTTTTNNKKSSKRVVVVAAAADDEEGGGG	1	AGA	R	K	50	468256	No	tRNA(UCU) appears to be arginine-type due to A20				0.67
GCA_011373585.1-AGA	2268192	B	GCA_011373585.1	Chlorobi bacterium	FALSE	FFLLSSSSYY**CC*WLLLLPPPPHHQQRRRRIIIMTTTTNNKKSSRRVVVVAAAADDEEGGGG	FFLLSSSSYY??CC?WLLLLPPPPHHQQRRRRIIIMTTTTNNKKSSK?VVVVAAAADDEEGGGG	1	AGA	R	K	108	164087	No	tRNA(UCU) appears to be arginine-type due to A20				0.62
GCA_002794645.1-AGA	2364212	B	GCA_002794645.1	Candidatus Thermofonsia Clade 3 bacterium	TRUE	FFLLSSSSYY**CC*WLLLLPPPPHHQQRRRRIIIMTTTTNNKKSSRRVVVVAAAADDEEGGGG	FFLLSSSSYY??CC?WLLLLPPPPHHQQRRRRIIIMTTTTNNKKSSKKVVVVAAAADDEEGGGG	2	AGA	R	K	137	372393	No	tRNA(UCU) appears to be arginine-type due to A20				0.64
GCA_003892345.1-AGA	2490857	B	GCA_003892345.1	Lautropia dentalis	TRUE	FFLLSSSSYY**CC*WLLLLPPPPHHQQRRRRIIIMTTTTNNKKSSRRVVVVAAAADDEEGGGG	FFLLSSSSYY??CC?WLLLLPPPPHHQQRRRRIIIMTTTTNNKKSSKKVVVVAAAADDEEGGGG	2	AGA	R	K	177	347741	No	tRNA(UCU) appears to be arginine-type due to A20				0.65
GCA_004367505.1-AGA	2510718	B	GCA_004367505.1	Chloroflexi bacterium OHK40	TRUE	FFLLSSSSYY**CC*WLLLLPPPPHHQQRRRRIIIMTTTTNNKKSSRRVVVVAAAADDEEGGGG	FFLLSSSSYY??CC?WLLLLPPPPHHQQRRRRIIIMTTTTNNKKSSKKVVVVAAAADDEEGGGG	2	AGA	R	K	193	569595	No	tRNA(UCU) appears to be arginine-type due to A20				0.68
GCA_004571065.1-AGA	2559610	B	GCA_004571065.1	Geodermatophilus sp. DF01_2	TRUE	FFLLSSSSYY**CC*WLLLLPPPPHHQQRRRRIIIMTTTTNNKKSSRRVVVVAAAADDEEGGGG	FF?LSSSSYY??CC?WLLLLPPPPHHQQRRRRII?MTTTTNNKKSSKRVVVVAAAADDEEGGGG	1	AGA	R	K	37	383351	No	tRNA(UCU) appears to be arginine-type due to A20				0.74
GCA_012913305.1-AGA	2728875	B	GCA_012913305.1	Rhodospirillaceae bacterium B3	TRUE	FFLLSSSSYY**CC*WLLLLPPPPHHQQRRRRIIIMTTTTNNKKSSRRVVVVAAAADDEEGGGG	FFLLSSSSYY??CC?WLLLLPPPPHHQQRRRRIIIMTTTTNNKKSSKRVVVVAAAADDEEGGGG	1	AGA	R	K	32	345765	No	tRNA(UCU) appears to be arginine-type due to A20				0.69
GCA_007827815.1-AGG	192	B	GCA_007827815.1	Azospirillum brasilense	FALSE	FFLLSSSSYY**CC*WLLLLPPPPHHQQRRRRIIIMTTTTNNKKSSRRVVVVAAAADDEEGGGG	FF?LSSSSYY??CC?WLLLLPPPPHHQQRRRRIIIMTTTTNNKKSSRKVVVVAAAADDEEGGGG	1	AGG	R	K	402	621341	No	tRNA(CCU) appears to be arginine-type due to A20				0.69
GCA_900177475.1-AGG	193	B	GCA_900177475.1	Azospirillum lipoferum	FALSE	FFLLSSSSYY**CC*WLLLLPPPPHHQQRRRRIIIMTTTTNNKKSSRRVVVVAAAADDEEGGGG	FFLLSSSSYY??CC?WLLLLPPPPHHQQRRRRIIIMTTTTNNKKSS?KVVVVAAAADDEEGGGG	1	AGG	R	K	914	666233	No	tRNA(CCU) appears to be arginine-type due to A20				0.69
GCA_000017205.1-AGG	287	B	GCA_000017205.1	Pseudomonas aeruginosa PA7	FALSE	FFLLSSSSYY**CC*WLLLLPPPPHHQQRRRRIIIMTTTTNNKKSSRRVVVVAAAADDEEGGGG	FFLLSSSSYY??CC?WLLLLPPPPHHQQRRRRIIIMTTTTNNKKSSRKVVVVAAAADDEEGGGG	1	AGG	R	K	1280	744132	No	tRNA(CCU) appears to be arginine-type due to A20				0.66
GCA_000789725.1-AGG	287	B	GCA_000789725.1	Pseudomonas aeruginosa	FALSE	FFLLSSSSYY**CC*WLLLLPPPPHHQQRRRRIIIMTTTTNNKKSSRRVVVVAAAADDEEGGGG	FFLLSSSSYY??CC?WLLLLPPPPHHQQRRRRIIIMTTTTNNKKSSRKVVVVAAAADDEEGGGG	1	AGG	R	K	1300	747526	No	tRNA(CCU) appears to be arginine-type due to A20				0.66
GCA_000790465.1-AGG	287	B	GCA_000790465.1	Pseudomonas aeruginosa	FALSE	FFLLSSSSYY**CC*WLLLLPPPPHHQQRRRRIIIMTTTTNNKKSSRRVVVVAAAADDEEGGGG	FFLLSSSSYY??CC?WLLLLPPPPHHQQRRRRIIIMTTTTNNKKSSRKVVVVAAAADDEEGGGG	1	AGG	R	K	1294	725038	No	tRNA(CCU) appears to be arginine-type due to A20				0.66
GCA_000791105.1-AGG	287	B	GCA_000791105.1	Pseudomonas aeruginosa	FALSE	FFLLSSSSYY**CC*WLLLLPPPPHHQQRRRRIIIMTTTTNNKKSSRRVVVVAAAADDEEGGGG	FFLLSSSSYY??CC?WLLLLPPPPHHQQRRRRIIIMTTTTNNKKSSRKVVVVAAAADDEEGGGG	1	AGG	R	K	1396	768261	No	tRNA(CCU) appears to be arginine-type due to A20				0.66
GCA_001280745.1-AGG	287	B	GCA_001280745.1	Pseudomonas aeruginosa	FALSE	FFLLSSSSYY**CC*WLLLLPPPPHHQQRRRRIIIMTTTTNNKKSSRRVVVVAAAADDEEGGGG	FFLLSSSSYY??CC?WLLLLPPPPHHQQRRRRIIIMTTTTNNKKSSRKVVVVAAAADDEEGGGG	1	AGG	R	K	1255	732844	No	tRNA(CCU) appears to be arginine-type due to A20				0.67
GCA_001280755.1-AGG	287	B	GCA_001280755.1	Pseudomonas aeruginosa	FALSE	FFLLSSSSYY**CC*WLLLLPPPPHHQQRRRRIIIMTTTTNNKKSSRRVVVVAAAADDEEGGGG	FFLLSSSSYY??CC?WLLLLPPPPHHQQRRRRIIIMTTTTNNKKSSRKVVVVAAAADDEEGGGG	1	AGG	R	K	1204	706518	No	tRNA(CCU) appears to be arginine-type due to A20				0.67
GCA_001280765.1-AGG	287	B	GCA_001280765.1	Pseudomonas aeruginosa	FALSE	FFLLSSSSYY**CC*WLLLLPPPPHHQQRRRRIIIMTTTTNNKKSSRRVVVVAAAADDEEGGGG	FFLLSSSSYY??CC?WLLLLPPPPHHQQRRRRIIIMTTTTNNKKSSRKVVVVAAAADDEEGGGG	1	AGG	R	K	1312	725767	No	tRNA(CCU) appears to be arginine-type due to A20				0.67
GCA_001294675.1-AGG	287	B	GCA_001294675.1	Pseudomonas aeruginosa	FALSE	FFLLSSSSYY**CC*WLLLLPPPPHHQQRRRRIIIMTTTTNNKKSSRRVVVVAAAADDEEGGGG	FFLLSSSSYY??CC?WLLLLPPPPHHQQRRRRIIIMTTTTNNKKSSRKVVVVAAAADDEEGGGG	1	AGG	R	K	1284	713549	No	tRNA(CCU) appears to be arginine-type due to A20				0.67
GCA_001402955.1-AGG	287	B	GCA_001402955.1	Pseudomonas aeruginosa	FALSE	FFLLSSSSYY**CC*WLLLLPPPPHHQQRRRRIIIMTTTTNNKKSSRRVVVVAAAADDEEGGGG	FFLLSSSSYY??CC?WLLLLPPPPHHQQRRRRIIIMTTTTNNKKSSRKVVVVAAAADDEEGGGG	1	AGG	R	K	1314	721065	No	tRNA(CCU) appears to be arginine-type due to A20				0.67
GCA_001444975.1-AGG	287	B	GCA_001444975.1	Pseudomonas aeruginosa	FALSE	FFLLSSSSYY**CC*WLLLLPPPPHHQQRRRRIIIMTTTTNNKKSSRRVVVVAAAADDEEGGGG	FFLLSSSSYY??CC?WLLLLPPPPHHQQRRRRIIIMTTTTNNKKSSRKVVVVAAAADDEEGGGG	1	AGG	R	K	1320	759480	No	tRNA(CCU) appears to be arginine-type due to A20				0.67
GCA_001449385.1-AGG	287	B	GCA_001449385.1	Pseudomonas aeruginosa	FALSE	FFLLSSSSYY**CC*WLLLLPPPPHHQQRRRRIIIMTTTTNNKKSSRRVVVVAAAADDEEGGGG	FFLLSSSSYY??CC?WLLLLPPPPHHQQRRRRIIIMTTTTNNKKSSRKVVVVAAAADDEEGGGG	1	AGG	R	K	1237	709909	No	tRNA(CCU) appears to be arginine-type due to A20				0.67
GCA_001449465.1-AGG	287	B	GCA_001449465.1	Pseudomonas aeruginosa	FALSE	FFLLSSSSYY**CC*WLLLLPPPPHHQQRRRRIIIMTTTTNNKKSSRRVVVVAAAADDEEGGGG	FFLLSSSSYY??CC?WLLLLPPPPHHQQRRRRIIIMTTTTNNKKSSRKVVVVAAAADDEEGGGG	1	AGG	R	K	1310	735107	No	tRNA(CCU) appears to be arginine-type due to A20				0.66
GCA_001449965.1-AGG	287	B	GCA_001449965.1	Pseudomonas aeruginosa	FALSE	FFLLSSSSYY**CC*WLLLLPPPPHHQQRRRRIIIMTTTTNNKKSSRRVVVVAAAADDEEGGGG	FFLLSSSSYY??CC?WLLLLPPPPHHQQRRRRIIIMTTTTNNKKSSRKVVVVAAAADDEEGGGG	1	AGG	R	K	1235	705710	No	tRNA(CCU) appears to be arginine-type due to A20				0.67
GCA_001450165.1-AGG	287	B	GCA_001450165.1	Pseudomonas aeruginosa	FALSE	FFLLSSSSYY**CC*WLLLLPPPPHHQQRRRRIIIMTTTTNNKKSSRRVVVVAAAADDEEGGGG	FFLLSSSSYY??CC?WLLLLPPPPHHQQRRRRIIIMTTTTNNKKSSRKVVVVAAAADDEEGGGG	1	AGG	R	K	1287	730726	No	tRNA(CCU) appears to be arginine-type due to A20				0.66
GCA_001450355.1-AGG	287	B	GCA_001450355.1	Pseudomonas aeruginosa	FALSE	FFLLSSSSYY**CC*WLLLLPPPPHHQQRRRRIIIMTTTTNNKKSSRRVVVVAAAADDEEGGGG	FFLLSSSSYY??CC?WLLLLPPPPHHQQRRRRIIIMTTTTNNKKSSRKVVVVAAAADDEEGGGG	1	AGG	R	K	1289	736537	No	tRNA(CCU) appears to be arginine-type due to A20				0.66
GCA_001450465.1-AGG	287	B	GCA_001450465.1	Pseudomonas aeruginosa	FALSE	FFLLSSSSYY**CC*WLLLLPPPPHHQQRRRRIIIMTTTTNNKKSSRRVVVVAAAADDEEGGGG	FFLLSSSSYY??CC?WLLLLPPPPHHQQRRRRIIIMTTTTNNKKSSRKVVVVAAAADDEEGGGG	1	AGG	R	K	1218	709269	No	tRNA(CCU) appears to be arginine-type due to A20				0.67
GCA_001451945.1-AGG	287	B	GCA_001451945.1	Pseudomonas aeruginosa	FALSE	FFLLSSSSYY**CC*WLLLLPPPPHHQQRRRRIIIMTTTTNNKKSSRRVVVVAAAADDEEGGGG	FFLLSSSSYY??CC?WLLLLPPPPHHQQRRRRIIIMTTTTNNKKSSRKVVVVAAAADDEEGGGG	1	AGG	R	K	1287	744096	No	tRNA(CCU) appears to be arginine-type due to A20				0.66
GCA_001452985.1-AGG	287	B	GCA_001452985.1	Pseudomonas aeruginosa	FALSE	FFLLSSSSYY**CC*WLLLLPPPPHHQQRRRRIIIMTTTTNNKKSSRRVVVVAAAADDEEGGGG	FFLLSSSSYY??CC?WLLLLPPPPHHQQRRRRIIIMTTTTNNKKSSRKVVVVAAAADDEEGGGG	1	AGG	R	K	1215	705883	No	tRNA(CCU) appears to be arginine-type due to A20				0.66
GCA_001454675.1-AGG	287	B	GCA_001454675.1	Pseudomonas aeruginosa	FALSE	FFLLSSSSYY**CC*WLLLLPPPPHHQQRRRRIIIMTTTTNNKKSSRRVVVVAAAADDEEGGGG	FFLLSSSSYY??CC?WLLLLPPPPHHQQRRRRIIIMTTTTNNKKSSRKVVVVAAAADDEEGGGG	1	AGG	R	K	1272	726734	No	tRNA(CCU) appears to be arginine-type due to A20				0.67
GCA_001750435.1-AGG	287	B	GCA_001750435.1	Pseudomonas aeruginosa	FALSE	FFLLSSSSYY**CC*WLLLLPPPPHHQQRRRRIIIMTTTTNNKKSSRRVVVVAAAADDEEGGGG	FFLLSSSSYY??CC?WLLLLPPPPHHQQRRRRIIIMTTTTNNKKSSRKVVVVAAAADDEEGGGG	1	AGG	R	K	1421	803717	No	tRNA(CCU) appears to be arginine-type due to A20				0.67
GCA_001909445.1-AGG	287	B	GCA_001909445.1	Pseudomonas aeruginosa	FALSE	FFLLSSSSYY**CC*WLLLLPPPPHHQQRRRRIIIMTTTTNNKKSSRRVVVVAAAADDEEGGGG	FFLLSSSSYY??CC?WLLLLPPPPHHQQRRRRIIIMTTTTNNKKSSRKVVVVAAAADDEEGGGG	1	AGG	R	K	1308	747064	No	tRNA(CCU) appears to be arginine-type due to A20				0.66
GCA_002563335.1-AGG	287	B	GCA_002563335.1	Pseudomonas aeruginosa	FALSE	FFLLSSSSYY**CC*WLLLLPPPPHHQQRRRRIIIMTTTTNNKKSSRRVVVVAAAADDEEGGGG	FFLLSSSSYY??CC?WLLLLPPPPHHQQRRRRIIIMTTTTNNKKSSRKVVVVAAAADDEEGGGG	1	AGG	R	K	1261	707819	No	tRNA(CCU) appears to be arginine-type due to A20				0.67
GCA_002601815.1-AGG	287	B	GCA_002601815.1	Pseudomonas aeruginosa	FALSE	FFLLSSSSYY**CC*WLLLLPPPPHHQQRRRRIIIMTTTTNNKKSSRRVVVVAAAADDEEGGGG	FFLLSSSSYY??CC?WLLLLPPPPHHQQRRRRIIIMTTTTNNKKSSRKVVVVAAAADDEEGGGG	1	AGG	R	K	1268	711929	No	tRNA(CCU) appears to be arginine-type due to A20				0.67
GCA_002968755.1-AGG	287	B	GCA_002968755.1	Pseudomonas aeruginosa	FALSE	FFLLSSSSYY**CC*WLLLLPPPPHHQQRRRRIIIMTTTTNNKKSSRRVVVVAAAADDEEGGGG	FFLLSSSSYY??CC?WLLLLPPPPHHQQRRRRIIIMTTTTNNKKSSRKVVVVAAAADDEEGGGG	1	AGG	R	K	1419	775344	No	tRNA(CCU) appears to be arginine-type due to A20				0.66
GCA_003025345.2-AGG	287	B	GCA_003025345.2	Pseudomonas aeruginosa	FALSE	FFLLSSSSYY**CC*WLLLLPPPPHHQQRRRRIIIMTTTTNNKKSSRRVVVVAAAADDEEGGGG	FFLLSSSSYY??CC?WLLLLPPPPHHQQRRRRIIIMTTTTNNKKSSRKVVVVAAAADDEEGGGG	1	AGG	R	K	1147	676291	No	tRNA(CCU) appears to be arginine-type due to A20				0.67
GCA_003032395.1-AGG	287	B	GCA_003032395.1	Pseudomonas aeruginosa	FALSE	FFLLSSSSYY**CC*WLLLLPPPPHHQQRRRRIIIMTTTTNNKKSSRRVVVVAAAADDEEGGGG	FFLLSSSSYY??CC?WLLLLPPPPHHQQRRRRIIIMTTTTNNKKSSRKVVVVAAAADDEEGGGG	1	AGG	R	K	1290	738061	No	tRNA(CCU) appears to be arginine-type due to A20				0.67
GCA_003057595.1-AGG	287	B	GCA_003057595.1	Pseudomonas aeruginosa	FALSE	FFLLSSSSYY**CC*WLLLLPPPPHHQQRRRRIIIMTTTTNNKKSSRRVVVVAAAADDEEGGGG	FFLLSSSSYY??CC?WLLLLPPPPHHQQRRRRIIIMTTTTNNKKSSRKVVVVAAAADDEEGGGG	1	AGG	R	K	1261	723961	No	tRNA(CCU) appears to be arginine-type due to A20				0.67
GCA_003073695.1-AGG	287	B	GCA_003073695.1	Pseudomonas aeruginosa	FALSE	FFLLSSSSYY**CC*WLLLLPPPPHHQQRRRRIIIMTTTTNNKKSSRRVVVVAAAADDEEGGGG	FFLLSSSSYY??CC?WLLLLPPPPHHQQRRRRIIIMTTTTNNKKSSRKVVVVAAAADDEEGGGG	1	AGG	R	K	1405	775803	No	tRNA(CCU) appears to be arginine-type due to A20				0.66
GCA_003411505.2-AGG	287	B	GCA_003411505.2	Pseudomonas aeruginosa	FALSE	FFLLSSSSYY**CC*WLLLLPPPPHHQQRRRRIIIMTTTTNNKKSSRRVVVVAAAADDEEGGGG	FFLLSSSSYY??CC?WLLLLPPPPHHQQRRRRIIIMTTTTNNKKSSRKVVVVAAAADDEEGGGG	1	AGG	R	K	1297	742079	No	tRNA(CCU) appears to be arginine-type due to A20				0.67
GCA_003837245.1-AGG	287	B	GCA_003837245.1	Pseudomonas aeruginosa	FALSE	FFLLSSSSYY**CC*WLLLLPPPPHHQQRRRRIIIMTTTTNNKKSSRRVVVVAAAADDEEGGGG	FFLLSSSSYY??CC?WLLLLPPPPHHQQRRRRIIIMTTTTNNKKSSRKVVVVAAAADDEEGGGG	1	AGG	R	K	1277	723131	No	tRNA(CCU) appears to be arginine-type due to A20				0.67
GCA_003839025.1-AGG	287	B	GCA_003839025.1	Pseudomonas aeruginosa	FALSE	FFLLSSSSYY**CC*WLLLLPPPPHHQQRRRRIIIMTTTTNNKKSSRRVVVVAAAADDEEGGGG	FFLLSSSSYY??CC?WLLLLPPPPHHQQRRRRIIIMTTTTNNKKSSRKVVVVAAAADDEEGGGG	1	AGG	R	K	1285	724705	No	tRNA(CCU) appears to be arginine-type due to A20				0.66
GCA_003839875.1-AGG	287	B	GCA_003839875.1	Pseudomonas aeruginosa	FALSE	FFLLSSSSYY**CC*WLLLLPPPPHHQQRRRRIIIMTTTTNNKKSSRRVVVVAAAADDEEGGGG	FFLLSSSSYY??CC?WLLLLPPPPHHQQRRRRIIIMTTTTNNKKSSRKVVVVAAAADDEEGGGG	1	AGG	R	K	1281	714572	No	tRNA(CCU) appears to be arginine-type due to A20				0.67
GCA_003968155.1-AGG	287	B	GCA_003968155.1	Pseudomonas aeruginosa	FALSE	FFLLSSSSYY**CC*WLLLLPPPPHHQQRRRRIIIMTTTTNNKKSSRRVVVVAAAADDEEGGGG	FFLLSSSSYY??CC?WLLLLPPPPHHQQRRRRIIIMTTTTNNKKSSRKVVVVAAAADDEEGGGG	1	AGG	R	K	1319	746366	No	tRNA(CCU) appears to be arginine-type due to A20				0.66
GCA_003968475.1-AGG	287	B	GCA_003968475.1	Pseudomonas aeruginosa	FALSE	FFLLSSSSYY**CC*WLLLLPPPPHHQQRRRRIIIMTTTTNNKKSSRRVVVVAAAADDEEGGGG	FFLLSSSSYY??CC?WLLLLPPPPHHQQRRRRIIIMTTTTNNKKSSRKVVVVAAAADDEEGGGG	1	AGG	R	K	1322	747808	No	tRNA(CCU) appears to be arginine-type due to A20				0.66
GCA_003968965.1-AGG	287	B	GCA_003968965.1	Pseudomonas aeruginosa	FALSE	FFLLSSSSYY**CC*WLLLLPPPPHHQQRRRRIIIMTTTTNNKKSSRRVVVVAAAADDEEGGGG	FFLLSSSSYY??CC?WLLLLPPPPHHQQRRRRIIIMTTTTNNKKSSRKVVVVAAAADDEEGGGG	1	AGG	R	K	1268	734069	No	tRNA(CCU) appears to be arginine-type due to A20				0.67
GCA_004351335.1-AGG	287	B	GCA_004351335.1	Pseudomonas aeruginosa	FALSE	FFLLSSSSYY**CC*WLLLLPPPPHHQQRRRRIIIMTTTTNNKKSSRRVVVVAAAADDEEGGGG	FFLLSSSSYY??CC?WLLLLPPPPHHQQRRRRIIIMTTTTNNKKSSRKVVVVAAAADDEEGGGG	1	AGG	R	K	1480	804909	No	tRNA(CCU) appears to be arginine-type due to A20				0.66
GCA_006971785.1-AGG	287	B	GCA_006971785.1	Pseudomonas aeruginosa	FALSE	FFLLSSSSYY**CC*WLLLLPPPPHHQQRRRRIIIMTTTTNNKKSSRRVVVVAAAADDEEGGGG	FFLLSSSSYY??CC?WLLLLPPPPHHQQRRRRIIIMTTTTNNKKSSRKVVVVAAAADDEEGGGG	1	AGG	R	K	1336	751360	No	tRNA(CCU) appears to be arginine-type due to A20				0.66
GCA_008802575.1-AGG	287	B	GCA_008802575.1	Pseudomonas aeruginosa	FALSE	FFLLSSSSYY**CC*WLLLLPPPPHHQQRRRRIIIMTTTTNNKKSSRRVVVVAAAADDEEGGGG	FFLLSSSSYY??CC?WLLLLPPPPHHQQRRRRIIIMTTTTNNKKSSRKVVVVAAAADDEEGGGG	1	AGG	R	K	1475	796942	No	tRNA(CCU) appears to be arginine-type due to A20				0.66
GCA_900147135.1-AGG	287	B	GCA_900147135.1	Pseudomonas aeruginosa	FALSE	FFLLSSSSYY**CC*WLLLLPPPPHHQQRRRRIIIMTTTTNNKKSSRRVVVVAAAADDEEGGGG	FFLLSSSSYY??CC?WLLLLPPPPHHQQRRRRIIIMTTTTNNKKSSRKVVVVAAAADDEEGGGG	1	AGG	R	K	990	721082	No	tRNA(CCU) appears to be arginine-type due to A20				0.67
GCA_900608035.1-AGG	287	B	GCA_900608035.1	Pseudomonas aeruginosa	FALSE	FFLLSSSSYY**CC*WLLLLPPPPHHQQRRRRIIIMTTTTNNKKSSRRVVVVAAAADDEEGGGG	FFLLSSSSYY??CC?WLLLLPPPPHHQQRRRRIIIMTTTTNNKKSSRKVVVVAAAADDEEGGGG	1	AGG	R	K	1205	690751	No	tRNA(CCU) appears to be arginine-type due to A20				0.66
GCA_900706985.1-AGG	287	B	GCA_900706985.1	Pseudomonas aeruginosa	FALSE	FFLLSSSSYY**CC*WLLLLPPPPHHQQRRRRIIIMTTTTNNKKSSRRVVVVAAAADDEEGGGG	FFLLSSSSYY??CC?WLLLLPPPPHHQQRRRRIIIMTTTTNNKKSSRKVVVVAAAADDEEGGGG	1	AGG	R	K	1265	710196	No	tRNA(CCU) appears to be arginine-type due to A20				0.67
GCA_901420175.1-AGG	287	B	GCA_901420175.1	Pseudomonas aeruginosa	FALSE	FFLLSSSSYY**CC*WLLLLPPPPHHQQRRRRIIIMTTTTNNKKSSRRVVVVAAAADDEEGGGG	FFLLSSSSYY??CC?WLLLLPPPPHHQQRRRRIIIMTTTTNNKKSSRKVVVVAAAADDEEGGGG	1	AGG	R	K	1238	694985	No	tRNA(CCU) appears to be arginine-type due to A20				0.67
GCA_000009125.1-AGG	305	B	GCA_000009125.1	Ralstonia solanacearum GMI1000	TRUE	FFLLSSSSYY**CC*WLLLLPPPPHHQQRRRRIIIMTTTTNNKKSSRRVVVVAAAADDEEGGGG	FFLLSSSSYY??CC?WLLLLPPPPHHQQRRRRIIIMTTTTNNKKSSRKVVVVAAAADDEEGGGG	1	AGG	R	K	745	550743	No	tRNA(CCU) appears to be arginine-type due to A20				0.67
GCA_000197855.1-AGG	305	B	GCA_000197855.1	Ralstonia solanacearum CFBP2957	FALSE	FFLLSSSSYY**CC*WLLLLPPPPHHQQRRRRIIIMTTTTNNKKSSRRVVVVAAAADDEEGGGG	FFLLSSSSYY??CC?WLLLLPPPPHHQQRRRRIIIMTTTTNNKKSSRKVVVVAAAADDEEGGGG	1	AGG	R	K	331	361446	No	tRNA(CCU) appears to be arginine-type due to A20				0.66
GCA_000215325.1-AGG	305	B	GCA_000215325.1	Ralstonia solanacearum Po82	FALSE	FFLLSSSSYY**CC*WLLLLPPPPHHQQRRRRIIIMTTTTNNKKSSRRVVVVAAAADDEEGGGG	FFLLSSSSYY??CC?WLLLLPPPPHHQQRRRRIIIMTTTTNNKKSSRKVVVVAAAADDEEGGGG	1	AGG	R	K	617	525433	No	tRNA(CCU) appears to be arginine-type due to A20				0.67
GCA_000223115.2-AGG	305	B	GCA_000223115.2	Ralstonia solanacearum Y45	FALSE	FFLLSSSSYY**CC*WLLLLPPPPHHQQRRRRIIIMTTTTNNKKSSRRVVVVAAAADDEEGGGG	FFLLSSSSYY??CC?WLLLLPPPPHHQQRRRRIIIMTTTTNNKKSSRKVVVVAAAADDEEGGGG	1	AGG	R	K	810	595467	No	tRNA(CCU) appears to be arginine-type due to A20				0.67
GCA_000283475.1-AGG	305	B	GCA_000283475.1	Ralstonia solanacearum PSI07	FALSE	FFLLSSSSYY**CC*WLLLLPPPPHHQQRRRRIIIMTTTTNNKKSSRRVVVVAAAADDEEGGGG	FFLLSSSSYY??CC?WLLLLPPPPHHQQRRRRIIIMTTTTNNKKSSRKVVVVAAAADDEEGGGG	1	AGG	R	K	768	556945	No	tRNA(CCU) appears to be arginine-type due to A20				0.66
GCA_000285815.1-AGG	305	B	GCA_000285815.1	Ralstonia solanacearum K60	FALSE	FFLLSSSSYY**CC*WLLLLPPPPHHQQRRRRIIIMTTTTNNKKSSRRVVVVAAAADDEEGGGG	FFLLSSSSYY??CC?WLLLLPPPPHHQQRRRRIIIMTTTTNNKKSSRKVVVVAAAADDEEGGGG	1	AGG	R	K	381	390259	No	tRNA(CCU) appears to be arginine-type due to A20				0.66
GCA_000331875.1-AGG	305	B	GCA_000331875.1	Ralstonia solanacearum FJAT-91	FALSE	FFLLSSSSYY**CC*WLLLLPPPPHHQQRRRRIIIMTTTTNNKKSSRRVVVVAAAADDEEGGGG	FFLLSSSSYY??CC?WLLLLPPPPHHQQRRRRIIIMTTTTNNKKSSRKVVVVAAAADDEEGGGG	1	AGG	R	K	820	595852	No	tRNA(CCU) appears to be arginine-type due to A20				0.67
GCA_000331895.1-AGG	305	B	GCA_000331895.1	Ralstonia solanacearum FJAT-1458	FALSE	FFLLSSSSYY**CC*WLLLLPPPPHHQQRRRRIIIMTTTTNNKKSSRRVVVVAAAADDEEGGGG	FFLLSSSSYY??CC?WLLLLPPPPHHQQRRRRIIIMTTTTNNKKSSRKVVVVAAAADDEEGGGG	1	AGG	R	K	805	582105	No	tRNA(CCU) appears to be arginine-type due to A20				0.66
GCA_000348545.1-AGG	305	B	GCA_000348545.1	Ralstonia solanacearum FQY_4	FALSE	FFLLSSSSYY**CC*WLLLLPPPPHHQQRRRRIIIMTTTTNNKKSSRRVVVVAAAADDEEGGGG	FFLLSSSSYY??CC?WLLLLPPPPHHQQRRRRIIIMTTTTNNKKSSRKVVVVAAAADDEEGGGG	1	AGG	R	K	715	546819	No	tRNA(CCU) appears to be arginine-type due to A20				0.67
GCA_000430925.2-AGG	305	B	GCA_000430925.2	Ralstonia solanacearum SD54	FALSE	FFLLSSSSYY**CC*WLLLLPPPPHHQQRRRRIIIMTTTTNNKKSSRRVVVVAAAADDEEGGGG	FFLLSSSSYY??CC?WLLLLPPPPHHQQRRRRIIIMTTTTNNKKSSRKVVVVAAAADDEEGGGG	1	AGG	R	K	730	545965	No	tRNA(CCU) appears to be arginine-type due to A20				0.67
GCA_000525615.1-AGG	305	B	GCA_000525615.1	Ralstonia solanacearum P673	FALSE	FFLLSSSSYY**CC*WLLLLPPPPHHQQRRRRIIIMTTTTNNKKSSRRVVVVAAAADDEEGGGG	FFLLSSSSYY??CC?WLLLLPPPPHHQQRRRRIIIMTTTTNNKKSSRKVVVVAAAADDEEGGGG	1	AGG	R	K	643	547658	No	tRNA(CCU) appears to be arginine-type due to A20				0.67
GCA_000671315.1-AGG	305	B	GCA_000671315.1	Ralstonia solanacearum Rs-10-244	FALSE	FFLLSSSSYY**CC*WLLLLPPPPHHQQRRRRIIIMTTTTNNKKSSRRVVVVAAAADDEEGGGG	FFLLSSSSYY??CC?WLLLLPPPPHHQQRRRRIIIMTTTTNNKKSSRKVVVVAAAADDEEGGGG	1	AGG	R	K	716	541064	No	tRNA(CCU) appears to be arginine-type due to A20				0.67
GCA_000671335.1-AGG	305	B	GCA_000671335.1	Ralstonia solanacearum Rs-09-161	FALSE	FFLLSSSSYY**CC*WLLLLPPPPHHQQRRRRIIIMTTTTNNKKSSRRVVVVAAAADDEEGGGG	FFLLSSSSYY??CC?WLLLLPPPPHHQQRRRRIIIMTTTTNNKKSSRKVVVVAAAADDEEGGGG	1	AGG	R	K	741	540561	No	tRNA(CCU) appears to be arginine-type due to A20				0.67
GCA_000825805.2-AGG	305	B	GCA_000825805.2	Ralstonia solanacearum	FALSE	FFLLSSSSYY**CC*WLLLLPPPPHHQQRRRRIIIMTTTTNNKKSSRRVVVVAAAADDEEGGGG	FFLLSSSSYY??CC?WLLLLPPPPHHQQRRRRIIIMTTTTNNKKSSRKVVVVAAAADDEEGGGG	1	AGG	R	K	585	501622	No	tRNA(CCU) appears to be arginine-type due to A20				0.67
GCA_000825865.2-AGG	305	B	GCA_000825865.2	Ralstonia solanacearum	FALSE	FFLLSSSSYY**CC*WLLLLPPPPHHQQRRRRIIIMTTTTNNKKSSRRVVVVAAAADDEEGGGG	FFLLSSSSYY??CC?WLLLLPPPPHHQQRRRRIIIMTTTTNNKKSSRKVVVVAAAADDEEGGGG	1	AGG	R	K	577	498212	No	tRNA(CCU) appears to be arginine-type due to A20				0.67
GCA_000825885.2-AGG	305	B	GCA_000825885.2	Ralstonia solanacearum	FALSE	FFLLSSSSYY**CC*WLLLLPPPPHHQQRRRRIIIMTTTTNNKKSSRRVVVVAAAADDEEGGGG	FFLLSSSSYY??CC?WLLLLPPPPHHQQRRRRIIIMTTTTNNKKSSRKVVVVAAAADDEEGGGG	1	AGG	R	K	611	510167	No	tRNA(CCU) appears to be arginine-type due to A20				0.67
GCA_000825905.2-AGG	305	B	GCA_000825905.2	Ralstonia solanacearum	FALSE	FFLLSSSSYY**CC*WLLLLPPPPHHQQRRRRIIIMTTTTNNKKSSRRVVVVAAAADDEEGGGG	FFLLSSSSYY??CC?WLLLLPPPPHHQQRRRRIIIMTTTTNNKKSSRKVVVVAAAADDEEGGGG	1	AGG	R	K	591	506699	No	tRNA(CCU) appears to be arginine-type due to A20				0.67
GCA_001267515.1-AGG	305	B	GCA_001267515.1	Ralstonia solanacearum	FALSE	FFLLSSSSYY**CC*WLLLLPPPPHHQQRRRRIIIMTTTTNNKKSSRRVVVVAAAADDEEGGGG	FFLLSSSSYY??CC?WLLLLPPPPHHQQRRRRIIIMTTTTNNKKSSRKVVVVAAAADDEEGGGG	1	AGG	R	K	693	537715	No	tRNA(CCU) appears to be arginine-type due to A20				0.67
GCA_001373255.1-AGG	305	B	GCA_001373255.1	Ralstonia solanacearum	FALSE	FFLLSSSSYY**CC*WLLLLPPPPHHQQRRRRIIIMTTTTNNKKSSRRVVVVAAAADDEEGGGG	FFLLSSSSYY??CC?WLLLLPPPPHHQQRRRRIIIMTTTTNNKKSSRKVVVVAAAADDEEGGGG	1	AGG	R	K	599	505672	No	tRNA(CCU) appears to be arginine-type due to A20				0.67
GCA_001587155.1-AGG	305	B	GCA_001587155.1	Ralstonia solanacearum	FALSE	FFLLSSSSYY**CC*WLLLLPPPPHHQQRRRRIIIMTTTTNNKKSSRRVVVVAAAADDEEGGGG	FFLLSSSSYY??CC?WLLLLPPPPHHQQRRRRIIIMTTTTNNKKSSRKVVVVAAAADDEEGGGG	1	AGG	R	K	646	538750	No	tRNA(CCU) appears to be arginine-type due to A20				0.67
GCA_001644815.1-AGG	305	B	GCA_001644815.1	Ralstonia solanacearum	FALSE	FFLLSSSSYY**CC*WLLLLPPPPHHQQRRRRIIIMTTTTNNKKSSRRVVVVAAAADDEEGGGG	FFLLSSSSYY??CC?WLLLLPPPPHHQQRRRRIIIMTTTTNNKKSSRKVVVVAAAADDEEGGGG	1	AGG	R	K	663	556595	No	tRNA(CCU) appears to be arginine-type due to A20				0.67
GCA_001644855.1-AGG	305	B	GCA_001644855.1	Ralstonia solanacearum	FALSE	FFLLSSSSYY**CC*WLLLLPPPPHHQQRRRRIIIMTTTTNNKKSSRRVVVVAAAADDEEGGGG	FFLLSSSSYY??CC?WLLLLPPPPHHQQRRRRIIIMTTTTNNKKSSRKVVVVAAAADDEEGGGG	1	AGG	R	K	659	561778	No	tRNA(CCU) appears to be arginine-type due to A20				0.67
GCA_001644865.1-AGG	305	B	GCA_001644865.1	Ralstonia solanacearum	FALSE	FFLLSSSSYY**CC*WLLLLPPPPHHQQRRRRIIIMTTTTNNKKSSRRVVVVAAAADDEEGGGG	FFLLSSSSYY??CC?WLLLLPPPPHHQQRRRRIIIMTTTTNNKKSSRKVVVVAAAADDEEGGGG	1	AGG	R	K	774	574217	No	tRNA(CCU) appears to be arginine-type due to A20				0.67
GCA_001708525.1-AGG	305	B	GCA_001708525.1	Ralstonia solanacearum	FALSE	FFLLSSSSYY**CC*WLLLLPPPPHHQQRRRRIIIMTTTTNNKKSSRRVVVVAAAADDEEGGGG	FFLLSSSSYY??CC?WLLLLPPPPHHQQRRRRIIIMTTTTNNKKSSRKVVVVAAAADDEEGGGG	1	AGG	R	K	685	530527	No	tRNA(CCU) appears to be arginine-type due to A20				0.67
GCA_001854265.1-AGG	305	B	GCA_001854265.1	Ralstonia solanacearum	FALSE	FFLLSSSSYY**CC*WLLLLPPPPHHQQRRRRIIIMTTTTNNKKSSRRVVVVAAAADDEEGGGG	FFLLSSSSYY??CC?WLLLLPPPPHHQQRRRRIIIMTTTTNNKKSSRKVVVVAAAADDEEGGGG	1	AGG	R	K	718	532546	No	tRNA(CCU) appears to be arginine-type due to A20				0.67
GCA_001855495.1-AGG	305	B	GCA_001855495.1	Ralstonia solanacearum CaRs-Mep	FALSE	FFLLSSSSYY**CC*WLLLLPPPPHHQQRRRRIIIMTTTTNNKKSSRRVVVVAAAADDEEGGGG	FFLLSSSSYY??CC?WLLLLPPPPHHQQRRRRIIIMTTTTNNKKSSRKVVVVAAAADDEEGGGG	1	AGG	R	K	735	555183	No	tRNA(CCU) appears to be arginine-type due to A20				0.67
GCA_001870805.1-AGG	305	B	GCA_001870805.1	Ralstonia solanacearum	FALSE	FFLLSSSSYY**CC*WLLLLPPPPHHQQRRRRIIIMTTTTNNKKSSRRVVVVAAAADDEEGGGG	FFLLSSSSYY??CC?WLLLLPPPPHHQQRRRRIIIMTTTTNNKKSSRKVVVVAAAADDEEGGGG	1	AGG	R	K	721	545140	No	tRNA(CCU) appears to be arginine-type due to A20				0.67
GCA_001870825.1-AGG	305	B	GCA_001870825.1	Ralstonia solanacearum	FALSE	FFLLSSSSYY**CC*WLLLLPPPPHHQQRRRRIIIMTTTTNNKKSSRRVVVVAAAADDEEGGGG	FFLLSSSSYY??CC?WLLLLPPPPHHQQRRRRIIIMTTTTNNKKSSRKVVVVAAAADDEEGGGG	1	AGG	R	K	693	538617	No	tRNA(CCU) appears to be arginine-type due to A20				0.67
GCA_001876975.1-AGG	305	B	GCA_001876975.1	Ralstonia solanacearum	FALSE	FFLLSSSSYY**CC*WLLLLPPPPHHQQRRRRIIIMTTTTNNKKSSRRVVVVAAAADDEEGGGG	FFLLSSSSYY??CC?WLLLLPPPPHHQQRRRRIIIMTTTTNNKKSSRKVVVVAAAADDEEGGGG	1	AGG	R	K	769	556914	No	tRNA(CCU) appears to be arginine-type due to A20				0.67
GCA_001876985.1-AGG	305	B	GCA_001876985.1	Ralstonia solanacearum	FALSE	FFLLSSSSYY**CC*WLLLLPPPPHHQQRRRRIIIMTTTTNNKKSSRRVVVVAAAADDEEGGGG	FFLLSSSSYY??CC?WLLLLPPPPHHQQRRRRIIIMTTTTNNKKSSRKVVVVAAAADDEEGGGG	1	AGG	R	K	703	535179	No	tRNA(CCU) appears to be arginine-type due to A20				0.67
GCA_001879565.1-AGG	305	B	GCA_001879565.1	Ralstonia solanacearum OE1-1	FALSE	FFLLSSSSYY**CC*WLLLLPPPPHHQQRRRRIIIMTTTTNNKKSSRRVVVVAAAADDEEGGGG	FFLLSSSSYY??CC?WLLLLPPPPHHQQRRRRIIIMTTTTNNKKSSRKVVVVAAAADDEEGGGG	1	AGG	R	K	743	543691	No	tRNA(CCU) appears to be arginine-type due to A20				0.67
GCA_001887535.1-AGG	305	B	GCA_001887535.1	Ralstonia solanacearum FJAT-1458	FALSE	FFLLSSSSYY**CC*WLLLLPPPPHHQQRRRRIIIMTTTTNNKKSSRRVVVVAAAADDEEGGGG	FFLLSSSSYY??CC?WLLLLPPPPHHQQRRRRIIIMTTTTNNKKSSRKVVVVAAAADDEEGGGG	1	AGG	R	K	735	548044	No	tRNA(CCU) appears to be arginine-type due to A20				0.67
GCA_001891105.1-AGG	305	B	GCA_001891105.1	Ralstonia solanacearum	FALSE	FFLLSSSSYY**CC*WLLLLPPPPHHQQRRRRIIIMTTTTNNKKSSRRVVVVAAAADDEEGGGG	FFLLSSSSYY??CC?WLLLLPPPPHHQQRRRRIIIMTTTTNNKKSSRKVVVVAAAADDEEGGGG	1	AGG	R	K	777	556628	No	tRNA(CCU) appears to be arginine-type due to A20				0.67
GCA_001901665.1-AGG	305	B	GCA_001901665.1	Ralstonia solanacearum	FALSE	FFLLSSSSYY**CC*WLLLLPPPPHHQQRRRRIIIMTTTTNNKKSSRRVVVVAAAADDEEGGGG	FFLLSSSSYY??CC?WLLLLPPPPHHQQRRRRIIIMTTTTNNKKSSRKVVVVAAAADDEEGGGG	1	AGG	R	K	453	426152	No	tRNA(CCU) appears to be arginine-type due to A20				0.67
GCA_001920885.1-AGG	305	B	GCA_001920885.1	Ralstonia solanacearum	FALSE	FFLLSSSSYY**CC*WLLLLPPPPHHQQRRRRIIIMTTTTNNKKSSRRVVVVAAAADDEEGGGG	FFLLSSSSYY??CC?WLLLLPPPPHHQQRRRRIIIMTTTTNNKKSSRKVVVVAAAADDEEGGGG	1	AGG	R	K	572	388239	No	tRNA(CCU) appears to be arginine-type due to A20				0.65
GCA_001920905.1-AGG	305	B	GCA_001920905.1	Ralstonia solanacearum	FALSE	FFLLSSSSYY**CC*WLLLLPPPPHHQQRRRRIIIMTTTTNNKKSSRRVVVVAAAADDEEGGGG	FFLLSSSSYY??CC?WLLLLPPPPHHQQRRRRIIIMTTTTNNKKSSRKVVVVAAAADDEEGGGG	1	AGG	R	K	671	468952	No	tRNA(CCU) appears to be arginine-type due to A20				0.66
GCA_002155245.1-AGG	305	B	GCA_002155245.1	Ralstonia solanacearum FJAT-91	FALSE	FFLLSSSSYY**CC*WLLLLPPPPHHQQRRRRIIIMTTTTNNKKSSRRVVVVAAAADDEEGGGG	FFLLSSSSYY??CC?WLLLLPPPPHHQQRRRRIIIMTTTTNNKKSSRKVVVVAAAADDEEGGGG	1	AGG	R	K	753	552883	No	tRNA(CCU) appears to be arginine-type due to A20				0.67
GCA_002162015.1-AGG	305	B	GCA_002162015.1	Ralstonia solanacearum	FALSE	FFLLSSSSYY**CC*WLLLLPPPPHHQQRRRRIIIMTTTTNNKKSSRRVVVVAAAADDEEGGGG	FFLLSSSSYY??CC?WLLLLPPPPHHQQRRRRIIIMTTTTNNKKSSRKVVVVAAAADDEEGGGG	1	AGG	R	K	710	539527	No	tRNA(CCU) appears to be arginine-type due to A20				0.67
GCA_002251605.2-AGG	305	B	GCA_002251605.2	Ralstonia solanacearum	FALSE	FFLLSSSSYY**CC*WLLLLPPPPHHQQRRRRIIIMTTTTNNKKSSRRVVVVAAAADDEEGGGG	FFLLSSSSYY??CC?WLLLLPPPPHHQQRRRRIIIMTTTTNNKKSSRKVVVVAAAADDEEGGGG	1	AGG	R	K	507	503230	No	tRNA(CCU) appears to be arginine-type due to A20				0.67
GCA_002251695.1-AGG	305	B	GCA_002251695.1	Ralstonia solanacearum K60	FALSE	FFLLSSSSYY**CC*WLLLLPPPPHHQQRRRRIIIMTTTTNNKKSSRRVVVVAAAADDEEGGGG	FFLLSSSSYY??CC?WLLLLPPPPHHQQRRRRIIIMTTTTNNKKSSRKVVVVAAAADDEEGGGG	1	AGG	R	K	552	524293	No	tRNA(CCU) appears to be arginine-type due to A20				0.66
GCA_002894285.1-AGG	305	B	GCA_002894285.1	Ralstonia solanacearum	FALSE	FFLLSSSSYY**CC*WLLLLPPPPHHQQRRRRIIIMTTTTNNKKSSRRVVVVAAAADDEEGGGG	FFLLSSSSYY??CC?WLLLLPPPPHHQQRRRRIIIMTTTTNNKKSSRKVVVVAAAADDEEGGGG	1	AGG	R	K	748	549119	No	tRNA(CCU) appears to be arginine-type due to A20				0.67
GCA_002930085.2-AGG	305	B	GCA_002930085.2	Ralstonia solanacearum	FALSE	FFLLSSSSYY**CC*WLLLLPPPPHHQQRRRRIIIMTTTTNNKKSSRRVVVVAAAADDEEGGGG	FFLLSSSSYY??CC?WLLLLPPPPHHQQRRRRIIIMTTTTNNKKSSRKVVVVAAAADDEEGGGG	1	AGG	R	K	914	632973	No	tRNA(CCU) appears to be arginine-type due to A20				0.67
GCA_003337165.1-AGG	305	B	GCA_003337165.1	Ralstonia solanacearum	FALSE	FFLLSSSSYY**CC*WLLLLPPPPHHQQRRRRIIIMTTTTNNKKSSRRVVVVAAAADDEEGGGG	FFLLSSSSYY??CC?WLLLLPPPPHHQQRRRRIIIMTTTTNNKKSSRKVVVVAAAADDEEGGGG	1	AGG	R	K	521	453896	No	tRNA(CCU) appears to be arginine-type due to A20				0.67
GCA_003515145.1-AGG	305	B	GCA_003515145.1	Ralstonia solanacearum	FALSE	FFLLSSSSYY**CC*WLLLLPPPPHHQQRRRRIIIMTTTTNNKKSSRRVVVVAAAADDEEGGGG	FFLLSSSSYY??CC?WLLLLPPPPHHQQRRRRIIIMTTTTNNKKSSRKVVVVAAAADDEEGGGG	1	AGG	R	K	679	536698	No	tRNA(CCU) appears to be arginine-type due to A20				0.66
GCA_003515185.1-AGG	305	B	GCA_003515185.1	Ralstonia solanacearum	FALSE	FFLLSSSSYY**CC*WLLLLPPPPHHQQRRRRIIIMTTTTNNKKSSRRVVVVAAAADDEEGGGG	FFLLSSSSYY??CC?WLLLLPPPPHHQQRRRRIIIMTTTTNNKKSSRKVVVVAAAADDEEGGGG	1	AGG	R	K	721	553449	No	tRNA(CCU) appears to be arginine-type due to A20				0.66
GCA_003515205.1-AGG	305	B	GCA_003515205.1	Ralstonia solanacearum	FALSE	FFLLSSSSYY**CC*WLLLLPPPPHHQQRRRRIIIMTTTTNNKKSSRRVVVVAAAADDEEGGGG	FFLLSSSSYY??CC?WLLLLPPPPHHQQRRRRIIIMTTTTNNKKSSRKVVVVAAAADDEEGGGG	1	AGG	R	K	720	536034	No	tRNA(CCU) appears to be arginine-type due to A20				0.67
GCA_003515225.1-AGG	305	B	GCA_003515225.1	Ralstonia solanacearum	FALSE	FFLLSSSSYY**CC*WLLLLPPPPHHQQRRRRIIIMTTTTNNKKSSRRVVVVAAAADDEEGGGG	FFLLSSSSYY??CC?WLLLLPPPPHHQQRRRRIIIMTTTTNNKKSSRKVVVVAAAADDEEGGGG	1	AGG	R	K	733	547397	No	tRNA(CCU) appears to be arginine-type due to A20				0.67
GCA_003515245.1-AGG	305	B	GCA_003515245.1	Ralstonia solanacearum	FALSE	FFLLSSSSYY**CC*WLLLLPPPPHHQQRRRRIIIMTTTTNNKKSSRRVVVVAAAADDEEGGGG	FFLLSSSSYY??CC?WLLLLPPPPHHQQRRRRIIIMTTTTNNKKSSRKVVVVAAAADDEEGGGG	1	AGG	R	K	753	549368	No	tRNA(CCU) appears to be arginine-type due to A20				0.67
GCA_003515265.1-AGG	305	B	GCA_003515265.1	Ralstonia solanacearum	FALSE	FFLLSSSSYY**CC*WLLLLPPPPHHQQRRRRIIIMTTTTNNKKSSRRVVVVAAAADDEEGGGG	FFLLSSSSYY??CC?WLLLLPPPPHHQQRRRRIIIMTTTTNNKKSSRKVVVVAAAADDEEGGGG	1	AGG	R	K	728	552971	No	tRNA(CCU) appears to be arginine-type due to A20				0.66
GCA_003515305.1-AGG	305	B	GCA_003515305.1	Ralstonia solanacearum	FALSE	FFLLSSSSYY**CC*WLLLLPPPPHHQQRRRRIIIMTTTTNNKKSSRRVVVVAAAADDEEGGGG	FFLLSSSSYY??CC?WLLLLPPPPHHQQRRRRIIIMTTTTNNKKSSRKVVVVAAAADDEEGGGG	1	AGG	R	K	734	536647	No	tRNA(CCU) appears to be arginine-type due to A20				0.67
GCA_003515325.1-AGG	305	B	GCA_003515325.1	Ralstonia solanacearum	FALSE	FFLLSSSSYY**CC*WLLLLPPPPHHQQRRRRIIIMTTTTNNKKSSRRVVVVAAAADDEEGGGG	FFLLSSSSYY??CC?WLLLLPPPPHHQQRRRRIIIMTTTTNNKKSSRKVVVVAAAADDEEGGGG	1	AGG	R	K	739	546184	No	tRNA(CCU) appears to be arginine-type due to A20				0.66
GCA_003515345.1-AGG	305	B	GCA_003515345.1	Ralstonia solanacearum	FALSE	FFLLSSSSYY**CC*WLLLLPPPPHHQQRRRRIIIMTTTTNNKKSSRRVVVVAAAADDEEGGGG	FFLLSSSSYY??CC?WLLLLPPPPHHQQRRRRIIIMTTTTNNKKSSRKVVVVAAAADDEEGGGG	1	AGG	R	K	735	549543	No	tRNA(CCU) appears to be arginine-type due to A20				0.67
GCA_003515365.1-AGG	305	B	GCA_003515365.1	Ralstonia solanacearum	FALSE	FFLLSSSSYY**CC*WLLLLPPPPHHQQRRRRIIIMTTTTNNKKSSRRVVVVAAAADDEEGGGG	FFLLSSSSYY??CC?WLLLLPPPPHHQQRRRRIIIMTTTTNNKKSSRKVVVVAAAADDEEGGGG	1	AGG	R	K	715	539395	No	tRNA(CCU) appears to be arginine-type due to A20				0.67
GCA_003515385.1-AGG	305	B	GCA_003515385.1	Ralstonia solanacearum	FALSE	FFLLSSSSYY**CC*WLLLLPPPPHHQQRRRRIIIMTTTTNNKKSSRRVVVVAAAADDEEGGGG	FFLLSSSSYY??CC?WLLLLPPPPHHQQRRRRIIIMTTTTNNKKSSRKVVVVAAAADDEEGGGG	1	AGG	R	K	719	541294	No	tRNA(CCU) appears to be arginine-type due to A20				0.66
GCA_003515405.1-AGG	305	B	GCA_003515405.1	Ralstonia solanacearum	FALSE	FFLLSSSSYY**CC*WLLLLPPPPHHQQRRRRIIIMTTTTNNKKSSRRVVVVAAAADDEEGGGG	FFLLSSSSYY??CC?WLLLLPPPPHHQQRRRRIIIMTTTTNNKKSSRKVVVVAAAADDEEGGGG	1	AGG	R	K	754	544106	No	tRNA(CCU) appears to be arginine-type due to A20				0.67
GCA_003515425.1-AGG	305	B	GCA_003515425.1	Ralstonia solanacearum	FALSE	FFLLSSSSYY**CC*WLLLLPPPPHHQQRRRRIIIMTTTTNNKKSSRRVVVVAAAADDEEGGGG	FFLLSSSSYY??CC?WLLLLPPPPHHQQRRRRIIIMTTTTNNKKSSRKVVVVAAAADDEEGGGG	1	AGG	R	K	745	550050	No	tRNA(CCU) appears to be arginine-type due to A20				0.66
GCA_003515465.1-AGG	305	B	GCA_003515465.1	Ralstonia solanacearum	FALSE	FFLLSSSSYY**CC*WLLLLPPPPHHQQRRRRIIIMTTTTNNKKSSRRVVVVAAAADDEEGGGG	FFLLSSSSYY??CC?WLLLLPPPPHHQQRRRRIIIMTTTTNNKKSSRKVVVVAAAADDEEGGGG	1	AGG	R	K	690	511395	No	tRNA(CCU) appears to be arginine-type due to A20				0.67
GCA_003515485.1-AGG	305	B	GCA_003515485.1	Ralstonia solanacearum	FALSE	FFLLSSSSYY**CC*WLLLLPPPPHHQQRRRRIIIMTTTTNNKKSSRRVVVVAAAADDEEGGGG	FFLLSSSSYY??CC?WLLLLPPPPHHQQRRRRIIIMTTTTNNKKSSRKVVVVAAAADDEEGGGG	1	AGG	R	K	748	549483	No	tRNA(CCU) appears to be arginine-type due to A20				0.66
GCA_003515525.1-AGG	305	B	GCA_003515525.1	Ralstonia solanacearum	FALSE	FFLLSSSSYY**CC*WLLLLPPPPHHQQRRRRIIIMTTTTNNKKSSRRVVVVAAAADDEEGGGG	FFLLSSSSYY??CC?WLLLLPPPPHHQQRRRRIIIMTTTTNNKKSSRKVVVVAAAADDEEGGGG	1	AGG	R	K	739	547092	No	tRNA(CCU) appears to be arginine-type due to A20				0.66
GCA_003515545.1-AGG	305	B	GCA_003515545.1	Ralstonia solanacearum	FALSE	FFLLSSSSYY**CC*WLLLLPPPPHHQQRRRRIIIMTTTTNNKKSSRRVVVVAAAADDEEGGGG	FFLLSSSSYY??CC?WLLLLPPPPHHQQRRRRIIIMTTTTNNKKSSRKVVVVAAAADDEEGGGG	1	AGG	R	K	751	551743	No	tRNA(CCU) appears to be arginine-type due to A20				0.67
GCA_003515565.1-AGG	305	B	GCA_003515565.1	Ralstonia solanacearum	FALSE	FFLLSSSSYY**CC*WLLLLPPPPHHQQRRRRIIIMTTTTNNKKSSRRVVVVAAAADDEEGGGG	FFLLSSSSYY??CC?WLLLLPPPPHHQQRRRRIIIMTTTTNNKKSSRKVVVVAAAADDEEGGGG	1	AGG	R	K	669	520994	No	tRNA(CCU) appears to be arginine-type due to A20				0.67
GCA_003515585.1-AGG	305	B	GCA_003515585.1	Ralstonia solanacearum	FALSE	FFLLSSSSYY**CC*WLLLLPPPPHHQQRRRRIIIMTTTTNNKKSSRRVVVVAAAADDEEGGGG	FFLLSSSSYY??CC?WLLLLPPPPHHQQRRRRIIIMTTTTNNKKSSRKVVVVAAAADDEEGGGG	1	AGG	R	K	754	552171	No	tRNA(CCU) appears to be arginine-type due to A20				0.67
GCA_003515605.1-AGG	305	B	GCA_003515605.1	Ralstonia solanacearum	FALSE	FFLLSSSSYY**CC*WLLLLPPPPHHQQRRRRIIIMTTTTNNKKSSRRVVVVAAAADDEEGGGG	FFLLSSSSYY??CC?WLLLLPPPPHHQQRRRRIIIMTTTTNNKKSSRKVVVVAAAADDEEGGGG	1	AGG	R	K	763	550928	No	tRNA(CCU) appears to be arginine-type due to A20				0.67
GCA_003576625.1-AGG	305	B	GCA_003576625.1	Ralstonia solanacearum	FALSE	FFLLSSSSYY**CC*WLLLLPPPPHHQQRRRRIIIMTTTTNNKKSSRRVVVVAAAADDEEGGGG	FFLLSSSSYY??CC?WLLLLPPPPHHQQRRRRIIIMTTTTNNKKSSRKVVVVAAAADDEEGGGG	1	AGG	R	K	723	542195	No	tRNA(CCU) appears to be arginine-type due to A20				0.67
GCA_003590585.1-AGG	305	B	GCA_003590585.1	Ralstonia solanacearum	FALSE	FFLLSSSSYY**CC*WLLLLPPPPHHQQRRRRIIIMTTTTNNKKSSRRVVVVAAAADDEEGGGG	FFLLSSSSYY??CC?WLLLLPPPPHHQQRRRRIIIMTTTTNNKKSSRKVVVVAAAADDEEGGGG	1	AGG	R	K	568	525884	No	tRNA(CCU) appears to be arginine-type due to A20				0.67
GCA_003595325.1-AGG	305	B	GCA_003595325.1	Ralstonia solanacearum	FALSE	FFLLSSSSYY**CC*WLLLLPPPPHHQQRRRRIIIMTTTTNNKKSSRRVVVVAAAADDEEGGGG	FFLLSSSSYY??CC?WLLLLPPPPHHQQRRRRIIIMTTTTNNKKSSRKVVVVAAAADDEEGGGG	1	AGG	R	K	737	538922	No	tRNA(CCU) appears to be arginine-type due to A20				0.67
GCA_003860665.1-AGG	305	B	GCA_003860665.1	Ralstonia solanacearum	FALSE	FFLLSSSSYY**CC*WLLLLPPPPHHQQRRRRIIIMTTTTNNKKSSRRVVVVAAAADDEEGGGG	FFLLSSSSYY??CC?WLLLLPPPPHHQQRRRRIIIMTTTTNNKKSSRKVVVVAAAADDEEGGGG	1	AGG	R	K	540	492477	No	tRNA(CCU) appears to be arginine-type due to A20				0.67
GCA_003860705.1-AGG	305	B	GCA_003860705.1	Ralstonia solanacearum	FALSE	FFLLSSSSYY**CC*WLLLLPPPPHHQQRRRRIIIMTTTTNNKKSSRRVVVVAAAADDEEGGGG	FFLLSSSSYY??CC?WLLLLPPPPHHQQRRRRIIIMTTTTNNKKSSRKVVVVAAAADDEEGGGG	1	AGG	R	K	572	503746	No	tRNA(CCU) appears to be arginine-type due to A20				0.67
GCA_003860725.1-AGG	305	B	GCA_003860725.1	Ralstonia solanacearum	FALSE	FFLLSSSSYY**CC*WLLLLPPPPHHQQRRRRIIIMTTTTNNKKSSRRVVVVAAAADDEEGGGG	FFLLSSSSYY??CC?WLLLLPPPPHHQQRRRRIIIMTTTTNNKKSSRKVVVVAAAADDEEGGGG	1	AGG	R	K	573	497143	No	tRNA(CCU) appears to be arginine-type due to A20				0.67
GCA_003860745.1-AGG	305	B	GCA_003860745.1	Ralstonia solanacearum	FALSE	FFLLSSSSYY**CC*WLLLLPPPPHHQQRRRRIIIMTTTTNNKKSSRRVVVVAAAADDEEGGGG	FFLLSSSSYY??CC?WLLLLPPPPHHQQRRRRIIIMTTTTNNKKSSRKVVVVAAAADDEEGGGG	1	AGG	R	K	577	503306	No	tRNA(CCU) appears to be arginine-type due to A20				0.67
GCA_003860765.1-AGG	305	B	GCA_003860765.1	Ralstonia solanacearum	FALSE	FFLLSSSSYY**CC*WLLLLPPPPHHQQRRRRIIIMTTTTNNKKSSRRVVVVAAAADDEEGGGG	FFLLSSSSYY??CC?WLLLLPPPPHHQQRRRRIIIMTTTTNNKKSSRKVVVVAAAADDEEGGGG	1	AGG	R	K	574	496883	No	tRNA(CCU) appears to be arginine-type due to A20				0.67
GCA_003999715.1-AGG	305	B	GCA_003999715.1	Ralstonia solanacearum	FALSE	FFLLSSSSYY**CC*WLLLLPPPPHHQQRRRRIIIMTTTTNNKKSSRRVVVVAAAADDEEGGGG	FFLLSSSSYY??CC?WLLLLPPPPHHQQRRRRIIIMTTTTNNKKSSRKVVVVAAAADDEEGGGG	1	AGG	R	K	766	553817	No	tRNA(CCU) appears to be arginine-type due to A20				0.67
GCA_006088755.1-AGG	305	B	GCA_006088755.1	Ralstonia solanacearum	FALSE	FFLLSSSSYY**CC*WLLLLPPPPHHQQRRRRIIIMTTTTNNKKSSRRVVVVAAAADDEEGGGG	FFLLSSSSYY??CC?WLLLLPPPPHHQQRRRRIIIMTTTTNNKKSSRKVVVVAAAADDEEGGGG	1	AGG	R	K	597	522370	No	tRNA(CCU) appears to be arginine-type due to A20				0.67
GCA_008271775.1-AGG	305	B	GCA_008271775.1	Ralstonia solanacearum	FALSE	FFLLSSSSYY**CC*WLLLLPPPPHHQQRRRRIIIMTTTTNNKKSSRRVVVVAAAADDEEGGGG	FFLLSSSSYY??CC?WLLLLPPPPHHQQRRRRIIIMTTTTNNKKSSRKVVVVAAAADDEEGGGG	1	AGG	R	K	791	580088	No	tRNA(CCU) appears to be arginine-type due to A20				0.67
GCA_008271845.1-AGG	305	B	GCA_008271845.1	Ralstonia solanacearum	FALSE	FFLLSSSSYY**CC*WLLLLPPPPHHQQRRRRIIIMTTTTNNKKSSRRVVVVAAAADDEEGGGG	FFLLSSSSYY??CC?WLLLLPPPPHHQQRRRRIIIMTTTTNNKKSSRKVVVVAAAADDEEGGGG	1	AGG	R	K	763	563666	No	tRNA(CCU) appears to be arginine-type due to A20				0.67
GCA_008271855.1-AGG	305	B	GCA_008271855.1	Ralstonia solanacearum	FALSE	FFLLSSSSYY**CC*WLLLLPPPPHHQQRRRRIIIMTTTTNNKKSSRRVVVVAAAADDEEGGGG	FFLLSSSSYY??CC?WLLLLPPPPHHQQRRRRIIIMTTTTNNKKSSRKVVVVAAAADDEEGGGG	1	AGG	R	K	798	582165	No	tRNA(CCU) appears to be arginine-type due to A20				0.67
GCA_009832805.1-AGG	305	B	GCA_009832805.1	Ralstonia solanacearum	FALSE	FFLLSSSSYY**CC*WLLLLPPPPHHQQRRRRIIIMTTTTNNKKSSRRVVVVAAAADDEEGGGG	FFLLSSSSYY??CC?WLLLLPPPPHHQQRRRRIIIMTTTTNNKKSSRKVVVVAAAADDEEGGGG	1	AGG	R	K	590	517486	No	tRNA(CCU) appears to be arginine-type due to A20				0.67
GCA_011290405.1-AGG	305	B	GCA_011290405.1	Ralstonia solanacearum	FALSE	FFLLSSSSYY**CC*WLLLLPPPPHHQQRRRRIIIMTTTTNNKKSSRRVVVVAAAADDEEGGGG	FFLLSSSSYY??CC?WLLLLPPPPHHQQRRRRIIIMTTTTNNKKSSRKVVVVAAAADDEEGGGG	1	AGG	R	K	776	552704	No	tRNA(CCU) appears to be arginine-type due to A20				0.67
GCA_011420365.1-AGG	305	B	GCA_011420365.1	Ralstonia solanacearum	FALSE	FFLLSSSSYY**CC*WLLLLPPPPHHQQRRRRIIIMTTTTNNKKSSRRVVVVAAAADDEEGGGG	FFLLSSSSYY??CC?WLLLLPPPPHHQQRRRRIIIMTTTTNNKKSSRKVVVVAAAADDEEGGGG	1	AGG	R	K	731	541368	No	tRNA(CCU) appears to be arginine-type due to A20				0.67
GCA_012062465.1-AGG	305	B	GCA_012062465.1	Ralstonia solanacearum	FALSE	FFLLSSSSYY**CC*WLLLLPPPPHHQQRRRRIIIMTTTTNNKKSSRRVVVVAAAADDEEGGGG	FFLLSSSSYY??CC?WLLLLPPPPHHQQRRRRIIIMTTTTNNKKSSRKVVVVAAAADDEEGGGG	1	AGG	R	K	758	553019	No	tRNA(CCU) appears to be arginine-type due to A20				0.67
GCA_012062495.1-AGG	305	B	GCA_012062495.1	Ralstonia solanacearum	FALSE	FFLLSSSSYY**CC*WLLLLPPPPHHQQRRRRIIIMTTTTNNKKSSRRVVVVAAAADDEEGGGG	FFLLSSSSYY??CC?WLLLLPPPPHHQQRRRRIIIMTTTTNNKKSSRKVVVVAAAADDEEGGGG	1	AGG	R	K	740	548544	No	tRNA(CCU) appears to be arginine-type due to A20				0.67
GCA_012062505.1-AGG	305	B	GCA_012062505.1	Ralstonia solanacearum	FALSE	FFLLSSSSYY**CC*WLLLLPPPPHHQQRRRRIIIMTTTTNNKKSSRRVVVVAAAADDEEGGGG	FFLLSSSSYY??CC?WLLLLPPPPHHQQRRRRIIIMTTTTNNKKSSRKVVVVAAAADDEEGGGG	1	AGG	R	K	753	549175	No	tRNA(CCU) appears to be arginine-type due to A20				0.67
GCA_012062545.1-AGG	305	B	GCA_012062545.1	Ralstonia solanacearum	FALSE	FFLLSSSSYY**CC*WLLLLPPPPHHQQRRRRIIIMTTTTNNKKSSRRVVVVAAAADDEEGGGG	FFLLSSSSYY??CC?WLLLLPPPPHHQQRRRRIIIMTTTTNNKKSSRKVVVVAAAADDEEGGGG	1	AGG	R	K	741	545985	No	tRNA(CCU) appears to be arginine-type due to A20				0.67
GCA_012062585.1-AGG	305	B	GCA_012062585.1	Ralstonia solanacearum	FALSE	FFLLSSSSYY**CC*WLLLLPPPPHHQQRRRRIIIMTTTTNNKKSSRRVVVVAAAADDEEGGGG	FFLLSSSSYY??CC?WLLLLPPPPHHQQRRRRIIIMTTTTNNKKSSRKVVVVAAAADDEEGGGG	1	AGG	R	K	738	542726	No	tRNA(CCU) appears to be arginine-type due to A20				0.67
GCA_012062595.1-AGG	305	B	GCA_012062595.1	Ralstonia solanacearum	FALSE	FFLLSSSSYY**CC*WLLLLPPPPHHQQRRRRIIIMTTTTNNKKSSRRVVVVAAAADDEEGGGG	FFLLSSSSYY??CC?WLLLLPPPPHHQQRRRRIIIMTTTTNNKKSSRKVVVVAAAADDEEGGGG	1	AGG	R	K	744	555338	No	tRNA(CCU) appears to be arginine-type due to A20				0.67
GCA_012062605.1-AGG	305	B	GCA_012062605.1	Ralstonia solanacearum	FALSE	FFLLSSSSYY**CC*WLLLLPPPPHHQQRRRRIIIMTTTTNNKKSSRRVVVVAAAADDEEGGGG	FFLLSSSSYY??CC?WLLLLPPPPHHQQRRRRIIIMTTTTNNKKSSRKVVVVAAAADDEEGGGG	1	AGG	R	K	751	555454	No	tRNA(CCU) appears to be arginine-type due to A20				0.67
GCA_012062645.1-AGG	305	B	GCA_012062645.1	Ralstonia solanacearum	FALSE	FFLLSSSSYY**CC*WLLLLPPPPHHQQRRRRIIIMTTTTNNKKSSRRVVVVAAAADDEEGGGG	FFLLSSSSYY??CC?WLLLLPPPPHHQQRRRRIIIMTTTTNNKKSSRKVVVVAAAADDEEGGGG	1	AGG	R	K	776	562252	No	tRNA(CCU) appears to be arginine-type due to A20				0.67
GCA_012062655.1-AGG	305	B	GCA_012062655.1	Ralstonia solanacearum	FALSE	FFLLSSSSYY**CC*WLLLLPPPPHHQQRRRRIIIMTTTTNNKKSSRRVVVVAAAADDEEGGGG	FFLLSSSSYY??CC?WLLLLPPPPHHQQRRRRIIIMTTTTNNKKSSRKVVVVAAAADDEEGGGG	1	AGG	R	K	736	544113	No	tRNA(CCU) appears to be arginine-type due to A20				0.67
GCA_012062685.1-AGG	305	B	GCA_012062685.1	Ralstonia solanacearum	FALSE	FFLLSSSSYY**CC*WLLLLPPPPHHQQRRRRIIIMTTTTNNKKSSRRVVVVAAAADDEEGGGG	FFLLSSSSYY??CC?WLLLLPPPPHHQQRRRRIIIMTTTTNNKKSSRKVVVVAAAADDEEGGGG	1	AGG	R	K	768	563025	No	tRNA(CCU) appears to be arginine-type due to A20				0.67
GCA_012062695.1-AGG	305	B	GCA_012062695.1	Ralstonia solanacearum	FALSE	FFLLSSSSYY**CC*WLLLLPPPPHHQQRRRRIIIMTTTTNNKKSSRRVVVVAAAADDEEGGGG	FFLLSSSSYY??CC?WLLLLPPPPHHQQRRRRIIIMTTTTNNKKSSRKVVVVAAAADDEEGGGG	1	AGG	R	K	726	544688	No	tRNA(CCU) appears to be arginine-type due to A20				0.67
GCA_012062725.1-AGG	305	B	GCA_012062725.1	Ralstonia solanacearum	FALSE	FFLLSSSSYY**CC*WLLLLPPPPHHQQRRRRIIIMTTTTNNKKSSRRVVVVAAAADDEEGGGG	FFLLSSSSYY??CC?WLLLLPPPPHHQQRRRRIIIMTTTTNNKKSSRKVVVVAAAADDEEGGGG	1	AGG	R	K	674	537952	No	tRNA(CCU) appears to be arginine-type due to A20				0.67
GCA_012062745.1-AGG	305	B	GCA_012062745.1	Ralstonia solanacearum	FALSE	FFLLSSSSYY**CC*WLLLLPPPPHHQQRRRRIIIMTTTTNNKKSSRRVVVVAAAADDEEGGGG	FFLLSSSSYY??CC?WLLLLPPPPHHQQRRRRIIIMTTTTNNKKSSRKVVVVAAAADDEEGGGG	1	AGG	R	K	746	553839	No	tRNA(CCU) appears to be arginine-type due to A20				0.67
GCA_012062765.1-AGG	305	B	GCA_012062765.1	Ralstonia solanacearum	FALSE	FFLLSSSSYY**CC*WLLLLPPPPHHQQRRRRIIIMTTTTNNKKSSRRVVVVAAAADDEEGGGG	FFLLSSSSYY??CC?WLLLLPPPPHHQQRRRRIIIMTTTTNNKKSSRKVVVVAAAADDEEGGGG	1	AGG	R	K	725	551670	No	tRNA(CCU) appears to be arginine-type due to A20				0.67
GCA_012062775.1-AGG	305	B	GCA_012062775.1	Ralstonia solanacearum	FALSE	FFLLSSSSYY**CC*WLLLLPPPPHHQQRRRRIIIMTTTTNNKKSSRRVVVVAAAADDEEGGGG	FFLLSSSSYY??CC?WLLLLPPPPHHQQRRRRIIIMTTTTNNKKSSRKVVVVAAAADDEEGGGG	1	AGG	R	K	677	535229	No	tRNA(CCU) appears to be arginine-type due to A20				0.67
GCA_012062785.1-AGG	305	B	GCA_012062785.1	Ralstonia solanacearum	FALSE	FFLLSSSSYY**CC*WLLLLPPPPHHQQRRRRIIIMTTTTNNKKSSRRVVVVAAAADDEEGGGG	FFLLSSSSYY??CC?WLLLLPPPPHHQQRRRRIIIMTTTTNNKKSSRKVVVVAAAADDEEGGGG	1	AGG	R	K	743	546784	No	tRNA(CCU) appears to be arginine-type due to A20				0.67
GCA_012062825.1-AGG	305	B	GCA_012062825.1	Ralstonia solanacearum	FALSE	FFLLSSSSYY**CC*WLLLLPPPPHHQQRRRRIIIMTTTTNNKKSSRRVVVVAAAADDEEGGGG	FFLLSSSSYY??CC?WLLLLPPPPHHQQRRRRIIIMTTTTNNKKSSRKVVVVAAAADDEEGGGG	1	AGG	R	K	755	555529	No	tRNA(CCU) appears to be arginine-type due to A20				0.67
GCA_012271305.1-AGG	305	B	GCA_012271305.1	Ralstonia solanacearum	FALSE	FFLLSSSSYY**CC*WLLLLPPPPHHQQRRRRIIIMTTTTNNKKSSRRVVVVAAAADDEEGGGG	FFLLSSSSYY??CC?WLLLLPPPPHHQQRRRRIIIMTTTTNNKKSSRKVVVVAAAADDEEGGGG	1	AGG	R	K	719	542492	No	tRNA(CCU) appears to be arginine-type due to A20				0.67
GCA_012271315.1-AGG	305	B	GCA_012271315.1	Ralstonia solanacearum	FALSE	FFLLSSSSYY**CC*WLLLLPPPPHHQQRRRRIIIMTTTTNNKKSSRRVVVVAAAADDEEGGGG	FFLLSSSSYY??CC?WLLLLPPPPHHQQRRRRIIIMTTTTNNKKSSRKVVVVAAAADDEEGGGG	1	AGG	R	K	747	546001	No	tRNA(CCU) appears to be arginine-type due to A20				0.67
GCA_012271325.1-AGG	305	B	GCA_012271325.1	Ralstonia solanacearum	FALSE	FFLLSSSSYY**CC*WLLLLPPPPHHQQRRRRIIIMTTTTNNKKSSRRVVVVAAAADDEEGGGG	FFLLSSSSYY??CC?WLLLLPPPPHHQQRRRRIIIMTTTTNNKKSSRKVVVVAAAADDEEGGGG	1	AGG	R	K	747	546670	No	tRNA(CCU) appears to be arginine-type due to A20				0.67
GCA_012271355.1-AGG	305	B	GCA_012271355.1	Ralstonia solanacearum	FALSE	FFLLSSSSYY**CC*WLLLLPPPPHHQQRRRRIIIMTTTTNNKKSSRRVVVVAAAADDEEGGGG	FFLLSSSSYY??CC?WLLLLPPPPHHQQRRRRIIIMTTTTNNKKSSRKVVVVAAAADDEEGGGG	1	AGG	R	K	747	545763	No	tRNA(CCU) appears to be arginine-type due to A20				0.67
GCA_012271385.1-AGG	305	B	GCA_012271385.1	Ralstonia solanacearum	FALSE	FFLLSSSSYY**CC*WLLLLPPPPHHQQRRRRIIIMTTTTNNKKSSRRVVVVAAAADDEEGGGG	FFLLSSSSYY??CC?WLLLLPPPPHHQQRRRRIIIMTTTTNNKKSSRKVVVVAAAADDEEGGGG	1	AGG	R	K	765	550856	No	tRNA(CCU) appears to be arginine-type due to A20				0.67
GCA_012271415.1-AGG	305	B	GCA_012271415.1	Ralstonia solanacearum	FALSE	FFLLSSSSYY**CC*WLLLLPPPPHHQQRRRRIIIMTTTTNNKKSSRRVVVVAAAADDEEGGGG	FFLLSSSSYY??CC?WLLLLPPPPHHQQRRRRIIIMTTTTNNKKSSRKVVVVAAAADDEEGGGG	1	AGG	R	K	758	550791	No	tRNA(CCU) appears to be arginine-type due to A20				0.67
GCA_012271435.1-AGG	305	B	GCA_012271435.1	Ralstonia solanacearum	FALSE	FFLLSSSSYY**CC*WLLLLPPPPHHQQRRRRIIIMTTTTNNKKSSRRVVVVAAAADDEEGGGG	FFLLSSSSYY??CC?WLLLLPPPPHHQQRRRRIIIMTTTTNNKKSSRKVVVVAAAADDEEGGGG	1	AGG	R	K	754	555495	No	tRNA(CCU) appears to be arginine-type due to A20				0.67
GCA_012271445.1-AGG	305	B	GCA_012271445.1	Ralstonia solanacearum	FALSE	FFLLSSSSYY**CC*WLLLLPPPPHHQQRRRRIIIMTTTTNNKKSSRRVVVVAAAADDEEGGGG	FFLLSSSSYY??CC?WLLLLPPPPHHQQRRRRIIIMTTTTNNKKSSRKVVVVAAAADDEEGGGG	1	AGG	R	K	765	558198	No	tRNA(CCU) appears to be arginine-type due to A20				0.67
GCA_012271485.1-AGG	305	B	GCA_012271485.1	Ralstonia solanacearum	FALSE	FFLLSSSSYY**CC*WLLLLPPPPHHQQRRRRIIIMTTTTNNKKSSRRVVVVAAAADDEEGGGG	FFLLSSSSYY??CC?WLLLLPPPPHHQQRRRRIIIMTTTTNNKKSSRKVVVVAAAADDEEGGGG	1	AGG	R	K	759	553903	No	tRNA(CCU) appears to be arginine-type due to A20				0.67
GCA_012271495.1-AGG	305	B	GCA_012271495.1	Ralstonia solanacearum	FALSE	FFLLSSSSYY**CC*WLLLLPPPPHHQQRRRRIIIMTTTTNNKKSSRRVVVVAAAADDEEGGGG	FFLLSSSSYY??CC?WLLLLPPPPHHQQRRRRIIIMTTTTNNKKSSRKVVVVAAAADDEEGGGG	1	AGG	R	K	739	549050	No	tRNA(CCU) appears to be arginine-type due to A20				0.67
GCA_012271525.1-AGG	305	B	GCA_012271525.1	Ralstonia solanacearum	FALSE	FFLLSSSSYY**CC*WLLLLPPPPHHQQRRRRIIIMTTTTNNKKSSRRVVVVAAAADDEEGGGG	FFLLSSSSYY??CC?WLLLLPPPPHHQQRRRRIIIMTTTTNNKKSSRKVVVVAAAADDEEGGGG	1	AGG	R	K	775	563253	No	tRNA(CCU) appears to be arginine-type due to A20				0.67
GCA_012271545.1-AGG	305	B	GCA_012271545.1	Ralstonia solanacearum	FALSE	FFLLSSSSYY**CC*WLLLLPPPPHHQQRRRRIIIMTTTTNNKKSSRRVVVVAAAADDEEGGGG	FFLLSSSSYY??CC?WLLLLPPPPHHQQRRRRIIIMTTTTNNKKSSRKVVVVAAAADDEEGGGG	1	AGG	R	K	778	559689	No	tRNA(CCU) appears to be arginine-type due to A20				0.67
GCA_012562465.1-AGG	305	B	GCA_012562465.1	Ralstonia solanacearum	FALSE	FFLLSSSSYY**CC*WLLLLPPPPHHQQRRRRIIIMTTTTNNKKSSRRVVVVAAAADDEEGGGG	FFLLSSSSYY??CC?WLLLLPPPPHHQQRRRRIIIMTTTTNNKKSSRKVVVVAAAADDEEGGGG	1	AGG	R	K	598	520005	No	tRNA(CCU) appears to be arginine-type due to A20				0.67
GCA_008015385.1-AGG	306	B	GCA_008015385.1	Pseudomonas sp.	FALSE	FFLLSSSSYY**CC*WLLLLPPPPHHQQRRRRIIIMTTTTNNKKSSRRVVVVAAAADDEEGGGG	FFLLSSSSYY??CC?WLLLLPPPPHHQQRRRRIIIMTTTTNNKKSSRKVVVVAAAADDEEGGGG	1	AGG	R	K	394	252028	No	tRNA(CCU) appears to be arginine-type due to A20				0.64
GCA_002393485.1-AGG	329	B	GCA_002393485.1	Ralstonia pickettii	FALSE	FFLLSSSSYY**CC*WLLLLPPPPHHQQRRRRIIIMTTTTNNKKSSRRVVVVAAAADDEEGGGG	FFLLSSSSYY??CC?WLLLLPPPPHHQQRRRRIIIMTTTTNNKKSSRKVVVVAAAADDEEGGGG	1	AGG	R	K	379	534994	No	tRNA(CCU) appears to be arginine-type due to A20				0.66
GCA_001021935.1-AGG	343	B	GCA_001021935.1	Xanthomonas translucens pv. undulosa	TRUE	FFLLSSSSYY**CC*WLLLLPPPPHHQQRRRRIIIMTTTTNNKKSSRRVVVVAAAADDEEGGGG	FFLLSSSSYY??CC?WLLLLPPPPHHQQRRRRIIIMTTTTNNKKSSRKVVVVAAAADDEEGGGG	1	AGG	R	K	373	429840	No	tRNA(CCU) appears to be arginine-type due to A20				0.68
GCA_000313775.1-AGG	343	B	GCA_000313775.1	Xanthomonas translucens pv. graminis ART-Xtg29	FALSE	FFLLSSSSYY**CC*WLLLLPPPPHHQQRRRRIIIMTTTTNNKKSSRRVVVVAAAADDEEGGGG	FFLLSSSSYY??CC?WLLLLPPPPHHQQRRRRIIIMTTTTNNKKSSRKVVVVAAAADDEEGGGG	1	AGG	R	K	394	458556	No	tRNA(CCU) appears to be arginine-type due to A20				0.69
GCA_000331775.1-AGG	343	B	GCA_000331775.1	Xanthomonas translucens pv. translucens DSM 18974	FALSE	FFLLSSSSYY**CC*WLLLLPPPPHHQQRRRRIIIMTTTTNNKKSSRRVVVVAAAADDEEGGGG	FFLLSSSSYY??CC?WLLLLPPPPHHQQRRRRIIIMTTTTNNKKSSRKVVVVAAAADDEEGGGG	1	AGG	R	K	444	492745	No	tRNA(CCU) appears to be arginine-type due to A20				0.68
GCA_000334075.1-AGG	343	B	GCA_000334075.1	Xanthomonas translucens DAR61454	FALSE	FFLLSSSSYY**CC*WLLLLPPPPHHQQRRRRIIIMTTTTNNKKSSRRVVVVAAAADDEEGGGG	FFLLSSSSYY??CC?WLLLLPPPPHHQQRRRRIIIMTTTTNNKKSSRKVVVVAAAADDEEGGGG	1	AGG	R	K	401	455751	No	tRNA(CCU) appears to be arginine-type due to A20				0.68
GCA_000807145.1-AGG	343	B	GCA_000807145.1	Xanthomonas translucens pv. cerealis	FALSE	FFLLSSSSYY**CC*WLLLLPPPPHHQQRRRRIIIMTTTTNNKKSSRRVVVVAAAADDEEGGGG	FFLLSSSSYY??CC?WLLLLPPPPHHQQRRRRIIIMTTTTNNKKSSRKVVVVAAAADDEEGGGG	1	AGG	R	K	408	422094	No	tRNA(CCU) appears to be arginine-type due to A20				0.67
GCA_001269865.1-AGG	343	B	GCA_001269865.1	Xanthomonas translucens pv. graminis	FALSE	FFLLSSSSYY**CC*WLLLLPPPPHHQQRRRRIIIMTTTTNNKKSSRRVVVVAAAADDEEGGGG	FFLLSSSSYY??CC?WLLLLPPPPHHQQRRRRIIIMTTTTNNKKSSRKVVVVAAAADDEEGGGG	1	AGG	R	K	328	392699	No	tRNA(CCU) appears to be arginine-type due to A20				0.68
GCA_001282765.1-AGG	343	B	GCA_001282765.1	Xanthomonas translucens pv. poae	FALSE	FFLLSSSSYY**CC*WLLLLPPPPHHQQRRRRIIIMTTTTNNKKSSRRVVVVAAAADDEEGGGG	FFLLSSSSYY??CC?WLLLLPPPPHHQQRRRRIIIMTTTTNNKKSSRKVVVVAAAADDEEGGGG	1	AGG	R	K	393	455869	No	tRNA(CCU) appears to be arginine-type due to A20				0.68
GCA_001282805.1-AGG	343	B	GCA_001282805.1	Xanthomonas translucens pv. arrhenatheri LMG 727	FALSE	FFLLSSSSYY**CC*WLLLLPPPPHHQQRRRRIIIMTTTTNNKKSSRRVVVVAAAADDEEGGGG	FFLLSSSSYY??CC?WLLLLPPPPHHQQRRRRIIIMTTTTNNKKSSRKVVVVAAAADDEEGGGG	1	AGG	R	K	408	467299	No	tRNA(CCU) appears to be arginine-type due to A20				0.68
GCA_001282885.1-AGG	343	B	GCA_001282885.1	Xanthomonas translucens pv. phlei	FALSE	FFLLSSSSYY**CC*WLLLLPPPPHHQQRRRRIIIMTTTTNNKKSSRRVVVVAAAADDEEGGGG	FFLLSSSSYY??CC?WLLLLPPPPHHQQRRRRIIIMTTTTNNKKSSRKVVVVAAAADDEEGGGG	1	AGG	R	K	375	436014	No	tRNA(CCU) appears to be arginine-type due to A20				0.68
GCA_001455815.1-AGG	343	B	GCA_001455815.1	Xanthomonas translucens	FALSE	FFLLSSSSYY**CC*WLLLLPPPPHHQQRRRRIIIMTTTTNNKKSSRRVVVVAAAADDEEGGGG	FFLLSSSSYY??CC?WLLLLPPPPHHQQRRRRIIIMTTTTNNKKSSRKVVVVAAAADDEEGGGG	1	AGG	R	K	431	459653	No	tRNA(CCU) appears to be arginine-type due to A20				0.68
GCA_001455835.1-AGG	343	B	GCA_001455835.1	Xanthomonas translucens	FALSE	FFLLSSSSYY**CC*WLLLLPPPPHHQQRRRRIIIMTTTTNNKKSSRRVVVVAAAADDEEGGGG	FFLLSSSSYY??CC?WLLLLPPPPHHQQRRRRIIIMTTTTNNKKSSRKVVVVAAAADDEEGGGG	1	AGG	R	K	436	465470	No	tRNA(CCU) appears to be arginine-type due to A20				0.68
GCA_001455845.1-AGG	343	B	GCA_001455845.1	Xanthomonas translucens	FALSE	FFLLSSSSYY**CC*WLLLLPPPPHHQQRRRRIIIMTTTTNNKKSSRRVVVVAAAADDEEGGGG	FFLLSSSSYY??CC?WLLLLPPPPHHQQRRRRIIIMTTTTNNKKSSRKVVVVAAAADDEEGGGG	1	AGG	R	K	437	489807	No	tRNA(CCU) appears to be arginine-type due to A20				0.68
GCA_001461905.1-AGG	343	B	GCA_001461905.1	Xanthomonas translucens	FALSE	FFLLSSSSYY**CC*WLLLLPPPPHHQQRRRRIIIMTTTTNNKKSSRRVVVVAAAADDEEGGGG	FFLLSSSSYY??CC?WLLLLPPPPHHQQRRRRIIIMTTTTNNKKSSRKVVVVAAAADDEEGGGG	1	AGG	R	K	421	459081	No	tRNA(CCU) appears to be arginine-type due to A20				0.68
GCA_001461915.1-AGG	343	B	GCA_001461915.1	Xanthomonas translucens	FALSE	FFLLSSSSYY**CC*WLLLLPPPPHHQQRRRRIIIMTTTTNNKKSSRRVVVVAAAADDEEGGGG	FFLLSSSSYY??CC?WLLLLPPPPHHQQRRRRIIIMTTTTNNKKSSRKVVVVAAAADDEEGGGG	1	AGG	R	K	406	445614	No	tRNA(CCU) appears to be arginine-type due to A20				0.68
GCA_001461925.1-AGG	343	B	GCA_001461925.1	Xanthomonas translucens	FALSE	FFLLSSSSYY**CC*WLLLLPPPPHHQQRRRRIIIMTTTTNNKKSSRRVVVVAAAADDEEGGGG	FFLLSSSSYY??CC?WLLLLPPPPHHQQRRRRIIIMTTTTNNKKSSRKVVVVAAAADDEEGGGG	1	AGG	R	K	427	459141	No	tRNA(CCU) appears to be arginine-type due to A20				0.68
GCA_001461965.1-AGG	343	B	GCA_001461965.1	Xanthomonas translucens	FALSE	FFLLSSSSYY**CC*WLLLLPPPPHHQQRRRRIIIMTTTTNNKKSSRRVVVVAAAADDEEGGGG	FFLLSSSSYY??CC?WLLLLPPPPHHQQRRRRIIIMTTTTNNKKSSRKVVVVAAAADDEEGGGG	1	AGG	R	K	429	497597	No	tRNA(CCU) appears to be arginine-type due to A20				0.68
GCA_001461975.1-AGG	343	B	GCA_001461975.1	Xanthomonas translucens	FALSE	FFLLSSSSYY**CC*WLLLLPPPPHHQQRRRRIIIMTTTTNNKKSSRRVVVVAAAADDEEGGGG	FFLLSSSSYY??CC?WLLLLPPPPHHQQRRRRIIIMTTTTNNKKSSRKVVVVAAAADDEEGGGG	1	AGG	R	K	455	475680	No	tRNA(CCU) appears to be arginine-type due to A20				0.68
GCA_001461995.1-AGG	343	B	GCA_001461995.1	Xanthomonas translucens	FALSE	FFLLSSSSYY**CC*WLLLLPPPPHHQQRRRRIIIMTTTTNNKKSSRRVVVVAAAADDEEGGGG	FFLLSSSSYY??CC?WLLLLPPPPHHQQRRRRIIIMTTTTNNKKSSRKVVVVAAAADDEEGGGG	1	AGG	R	K	412	445323	No	tRNA(CCU) appears to be arginine-type due to A20				0.68
GCA_001462005.1-AGG	343	B	GCA_001462005.1	Xanthomonas translucens	FALSE	FFLLSSSSYY**CC*WLLLLPPPPHHQQRRRRIIIMTTTTNNKKSSRRVVVVAAAADDEEGGGG	FFLLSSSSYY??CC?WLLLLPPPPHHQQRRRRIIIMTTTTNNKKSSRKVVVVAAAADDEEGGGG	1	AGG	R	K	430	478931	No	tRNA(CCU) appears to be arginine-type due to A20				0.68
GCA_001462045.1-AGG	343	B	GCA_001462045.1	Xanthomonas translucens	FALSE	FFLLSSSSYY**CC*WLLLLPPPPHHQQRRRRIIIMTTTTNNKKSSRRVVVVAAAADDEEGGGG	FFLLSSSSYY??CC?WLLLLPPPPHHQQRRRRIIIMTTTTNNKKSSRKVVVVAAAADDEEGGGG	1	AGG	R	K	459	493236	No	tRNA(CCU) appears to be arginine-type due to A20				0.68
GCA_001462065.1-AGG	343	B	GCA_001462065.1	Xanthomonas translucens	FALSE	FFLLSSSSYY**CC*WLLLLPPPPHHQQRRRRIIIMTTTTNNKKSSRRVVVVAAAADDEEGGGG	FFLLSSSSYY??CC?WLLLLPPPPHHQQRRRRIIIMTTTTNNKKSSRKVVVVAAAADDEEGGGG	1	AGG	R	K	405	460914	No	tRNA(CCU) appears to be arginine-type due to A20				0.68
GCA_001462075.1-AGG	343	B	GCA_001462075.1	Xanthomonas translucens	FALSE	FFLLSSSSYY**CC*WLLLLPPPPHHQQRRRRIIIMTTTTNNKKSSRRVVVVAAAADDEEGGGG	FFLLSSSSYY??CC?WLLLLPPPPHHQQRRRRIIIMTTTTNNKKSSRKVVVVAAAADDEEGGGG	1	AGG	R	K	463	494383	No	tRNA(CCU) appears to be arginine-type due to A20				0.68
GCA_001462095.1-AGG	343	B	GCA_001462095.1	Xanthomonas translucens	FALSE	FFLLSSSSYY**CC*WLLLLPPPPHHQQRRRRIIIMTTTTNNKKSSRRVVVVAAAADDEEGGGG	FFLLSSSSYY??CC?WLLLLPPPPHHQQRRRRIIIMTTTTNNKKSSRKVVVVAAAADDEEGGGG	1	AGG	R	K	425	477021	No	tRNA(CCU) appears to be arginine-type due to A20				0.68
GCA_001462125.1-AGG	343	B	GCA_001462125.1	Xanthomonas translucens	FALSE	FFLLSSSSYY**CC*WLLLLPPPPHHQQRRRRIIIMTTTTNNKKSSRRVVVVAAAADDEEGGGG	FFLLSSSSYY??CC?WLLLLPPPPHHQQRRRRIIIMTTTTNNKKSSRKVVVVAAAADDEEGGGG	1	AGG	R	K	447	545882	No	tRNA(CCU) appears to be arginine-type due to A20				0.68
GCA_001462145.1-AGG	343	B	GCA_001462145.1	Xanthomonas translucens	FALSE	FFLLSSSSYY**CC*WLLLLPPPPHHQQRRRRIIIMTTTTNNKKSSRRVVVVAAAADDEEGGGG	FFLLSSSSYY??CC?WLLLLPPPPHHQQRRRRIIIMTTTTNNKKSSRKVVVVAAAADDEEGGGG	1	AGG	R	K	398	450153	No	tRNA(CCU) appears to be arginine-type due to A20				0.68
GCA_001462155.1-AGG	343	B	GCA_001462155.1	Xanthomonas translucens	FALSE	FFLLSSSSYY**CC*WLLLLPPPPHHQQRRRRIIIMTTTTNNKKSSRRVVVVAAAADDEEGGGG	FFLLSSSSYY??CC?WLLLLPPPPHHQQRRRRIIIMTTTTNNKKSSRKVVVVAAAADDEEGGGG	1	AGG	R	K	412	456775	No	tRNA(CCU) appears to be arginine-type due to A20				0.68
GCA_001469515.1-AGG	343	B	GCA_001469515.1	Xanthomonas translucens pv. translucens	FALSE	FFLLSSSSYY**CC*WLLLLPPPPHHQQRRRRIIIMTTTTNNKKSSRRVVVVAAAADDEEGGGG	FFLLSSSSYY??CC?WLLLLPPPPHHQQRRRRIIIMTTTTNNKKSSRKVVVVAAAADDEEGGGG	1	AGG	R	K	419	486467	No	tRNA(CCU) appears to be arginine-type due to A20				0.68
GCA_001542045.1-AGG	343	B	GCA_001542045.1	Xanthomonas translucens	FALSE	FFLLSSSSYY**CC*WLLLLPPPPHHQQRRRRIIIMTTTTNNKKSSRRVVVVAAAADDEEGGGG	FFLLSSSSYY??CC?WLLLLPPPPHHQQRRRRIIIMTTTTNNKKSSRKVVVVAAAADDEEGGGG	1	AGG	R	K	441	507612	No	tRNA(CCU) appears to be arginine-type due to A20				0.68
GCA_001542205.1-AGG	343	B	GCA_001542205.1	Xanthomonas translucens	FALSE	FFLLSSSSYY**CC*WLLLLPPPPHHQQRRRRIIIMTTTTNNKKSSRRVVVVAAAADDEEGGGG	FFLLSSSSYY??CC?WLLLLPPPPHHQQRRRRIIIMTTTTNNKKSSRKVVVVAAAADDEEGGGG	1	AGG	R	K	416	491252	No	tRNA(CCU) appears to be arginine-type due to A20				0.68
GCA_001659895.1-AGG	343	B	GCA_001659895.1	Xanthomonas translucens pv. arrhenatheri	FALSE	FFLLSSSSYY**CC*WLLLLPPPPHHQQRRRRIIIMTTTTNNKKSSRRVVVVAAAADDEEGGGG	FFLLSSSSYY??CC?WLLLLPPPPHHQQRRRRIIIMTTTTNNKKSSRKVVVVAAAADDEEGGGG	1	AGG	R	K	418	470093	No	tRNA(CCU) appears to be arginine-type due to A20				0.68
GCA_001659905.1-AGG	343	B	GCA_001659905.1	Xanthomonas translucens pv. graminis	FALSE	FFLLSSSSYY**CC*WLLLLPPPPHHQQRRRRIIIMTTTTNNKKSSRRVVVVAAAADDEEGGGG	FFLLSSSSYY??CC?WLLLLPPPPHHQQRRRRIIIMTTTTNNKKSSRKVVVVAAAADDEEGGGG	1	AGG	R	K	371	438061	No	tRNA(CCU) appears to be arginine-type due to A20				0.69
GCA_001659915.1-AGG	343	B	GCA_001659915.1	Xanthomonas translucens pv. translucens	FALSE	FFLLSSSSYY**CC*WLLLLPPPPHHQQRRRRIIIMTTTTNNKKSSRRVVVVAAAADDEEGGGG	FFLLSSSSYY??CC?WLLLLPPPPHHQQRRRRIIIMTTTTNNKKSSRKVVVVAAAADDEEGGGG	1	AGG	R	K	414	492141	No	tRNA(CCU) appears to be arginine-type due to A20				0.68
GCA_001659965.1-AGG	343	B	GCA_001659965.1	Xanthomonas translucens pv. poae	FALSE	FFLLSSSSYY**CC*WLLLLPPPPHHQQRRRRIIIMTTTTNNKKSSRRVVVVAAAADDEEGGGG	FFLLSSSSYY??CC?WLLLLPPPPHHQQRRRRIIIMTTTTNNKKSSRKVVVVAAAADDEEGGGG	1	AGG	R	K	405	445655	No	tRNA(CCU) appears to be arginine-type due to A20				0.68
GCA_001707115.1-AGG	343	B	GCA_001707115.1	Xanthomonas translucens pv. cerealis	FALSE	FFLLSSSSYY**CC*WLLLLPPPPHHQQRRRRIIIMTTTTNNKKSSRRVVVVAAAADDEEGGGG	FFLLSSSSYY??CC?WLLLLPPPPHHQQRRRRIIIMTTTTNNKKSSRKVVVVAAAADDEEGGGG	1	AGG	R	K	410	437495	No	tRNA(CCU) appears to be arginine-type due to A20				0.67
GCA_001707125.1-AGG	343	B	GCA_001707125.1	Xanthomonas translucens pv. translucens	FALSE	FFLLSSSSYY**CC*WLLLLPPPPHHQQRRRRIIIMTTTTNNKKSSRRVVVVAAAADDEEGGGG	FFLLSSSSYY??CC?WLLLLPPPPHHQQRRRRIIIMTTTTNNKKSSRKVVVVAAAADDEEGGGG	1	AGG	R	K	446	493981	No	tRNA(CCU) appears to be arginine-type due to A20				0.68
GCA_001707145.1-AGG	343	B	GCA_001707145.1	Xanthomonas translucens pv. translucens	FALSE	FFLLSSSSYY**CC*WLLLLPPPPHHQQRRRRIIIMTTTTNNKKSSRRVVVVAAAADDEEGGGG	FFLLSSSSYY??CC?WLLLLPPPPHHQQRRRRIIIMTTTTNNKKSSRKVVVVAAAADDEEGGGG	1	AGG	R	K	443	488535	No	tRNA(CCU) appears to be arginine-type due to A20				0.68
GCA_001707195.1-AGG	343	B	GCA_001707195.1	Xanthomonas translucens pv. undulosa	FALSE	FFLLSSSSYY**CC*WLLLLPPPPHHQQRRRRIIIMTTTTNNKKSSRRVVVVAAAADDEEGGGG	FFLLSSSSYY??CC?WLLLLPPPPHHQQRRRRIIIMTTTTNNKKSSRKVVVVAAAADDEEGGGG	1	AGG	R	K	413	461456	No	tRNA(CCU) appears to be arginine-type due to A20				0.68
GCA_001707225.1-AGG	343	B	GCA_001707225.1	Xanthomonas translucens pv. undulosa	FALSE	FFLLSSSSYY**CC*WLLLLPPPPHHQQRRRRIIIMTTTTNNKKSSRRVVVVAAAADDEEGGGG	FFLLSSSSYY??CC?WLLLLPPPPHHQQRRRRIIIMTTTTNNKKSSRKVVVVAAAADDEEGGGG	1	AGG	R	K	453	482699	No	tRNA(CCU) appears to be arginine-type due to A20				0.68
GCA_001707275.1-AGG	343	B	GCA_001707275.1	Xanthomonas translucens pv. translucens	FALSE	FFLLSSSSYY**CC*WLLLLPPPPHHQQRRRRIIIMTTTTNNKKSSRRVVVVAAAADDEEGGGG	FFLLSSSSYY??CC?WLLLLPPPPHHQQRRRRIIIMTTTTNNKKSSRKVVVVAAAADDEEGGGG	1	AGG	R	K	432	471508	No	tRNA(CCU) appears to be arginine-type due to A20				0.68
GCA_001707285.1-AGG	343	B	GCA_001707285.1	Xanthomonas translucens pv. poae	FALSE	FFLLSSSSYY**CC*WLLLLPPPPHHQQRRRRIIIMTTTTNNKKSSRRVVVVAAAADDEEGGGG	FFLLSSSSYY??CC?WLLLLPPPPHHQQRRRRIIIMTTTTNNKKSSRKVVVVAAAADDEEGGGG	1	AGG	R	K	439	470034	No	tRNA(CCU) appears to be arginine-type due to A20				0.68
GCA_001707335.1-AGG	343	B	GCA_001707335.1	Xanthomonas translucens pv. poae	FALSE	FFLLSSSSYY**CC*WLLLLPPPPHHQQRRRRIIIMTTTTNNKKSSRRVVVVAAAADDEEGGGG	FFLLSSSSYY??CC?WLLLLPPPPHHQQRRRRIIIMTTTTNNKKSSRKVVVVAAAADDEEGGGG	1	AGG	R	K	426	486570	No	tRNA(CCU) appears to be arginine-type due to A20				0.68
GCA_001707435.1-AGG	343	B	GCA_001707435.1	Xanthomonas translucens pv. poae	FALSE	FFLLSSSSYY**CC*WLLLLPPPPHHQQRRRRIIIMTTTTNNKKSSRRVVVVAAAADDEEGGGG	FFLLSSSSYY??CC?WLLLLPPPPHHQQRRRRIIIMTTTTNNKKSSRKVVVVAAAADDEEGGGG	1	AGG	R	K	455	478429	No	tRNA(CCU) appears to be arginine-type due to A20				0.68
GCA_003050685.1-AGG	343	B	GCA_003050685.1	Xanthomonas translucens pv. undulosa	FALSE	FFLLSSSSYY**CC*WLLLLPPPPHHQQRRRRIIIMTTTTNNKKSSRRVVVVAAAADDEEGGGG	FFLLSSSSYY??CC?WLLLLPPPPHHQQRRRRIIIMTTTTNNKKSSRKVVVVAAAADDEEGGGG	1	AGG	R	K	395	434927	No	tRNA(CCU) appears to be arginine-type due to A20				0.68
GCA_006838285.1-AGG	343	B	GCA_006838285.1	Xanthomonas translucens pv. cerealis	FALSE	FFLLSSSSYY**CC*WLLLLPPPPHHQQRRRRIIIMTTTTNNKKSSRRVVVVAAAADDEEGGGG	FFLLSSSSYY??CC?WLLLLPPPPHHQQRRRRIIIMTTTTNNKKSSRKVVVVAAAADDEEGGGG	1	AGG	R	K	431	424862	No	tRNA(CCU) appears to be arginine-type due to A20				0.67
GCA_007829315.1-AGG	343	B	GCA_007829315.1	Xanthomonas translucens	FALSE	FFLLSSSSYY**CC*WLLLLPPPPHHQQRRRRIIIMTTTTNNKKSSRRVVVVAAAADDEEGGGG	FF?LSSSSYY??CC?WLLLLPPPPHHQQRRRRIIIMTTTTNNKKSSRKVVVVAAAADDEEGGGG	1	AGG	R	K	420	470086	No	tRNA(CCU) appears to be arginine-type due to A20				0.7
GCA_008330965.1-AGG	343	B	GCA_008330965.1	Xanthomonas translucens pv. undulosa	FALSE	FFLLSSSSYY**CC*WLLLLPPPPHHQQRRRRIIIMTTTTNNKKSSRRVVVVAAAADDEEGGGG	FFLLSSSSYY??CC?WLLLLPPPPHHQQRRRRIIIMTTTTNNKKSSRKVVVVAAAADDEEGGGG	1	AGG	R	K	377	427826	No	tRNA(CCU) appears to be arginine-type due to A20				0.68
GCA_008365355.1-AGG	343	B	GCA_008365355.1	Xanthomonas translucens pv. undulosa	FALSE	FFLLSSSSYY**CC*WLLLLPPPPHHQQRRRRIIIMTTTTNNKKSSRRVVVVAAAADDEEGGGG	FFLLSSSSYY??CC?WLLLLPPPPHHQQRRRRIIIMTTTTNNKKSSRKVVVVAAAADDEEGGGG	1	AGG	R	K	409	436838	No	tRNA(CCU) appears to be arginine-type due to A20				0.68
GCA_009600865.1-AGG	343	B	GCA_009600865.1	Xanthomonas translucens pv. translucens	FALSE	FFLLSSSSYY**CC*WLLLLPPPPHHQQRRRRIIIMTTTTNNKKSSRRVVVVAAAADDEEGGGG	FFLLSSSSYY??CC?WLLLLPPPPHHQQRRRRIIIMTTTTNNKKSSRKVVVVAAAADDEEGGGG	1	AGG	R	K	359	432994	No	tRNA(CCU) appears to be arginine-type due to A20				0.68
GCA_900092365.1-AGG	343	B	GCA_900092365.1	Xanthomonas translucens pv. graminis	FALSE	FFLLSSSSYY**CC*WLLLLPPPPHHQQRRRRIIIMTTTTNNKKSSRRVVVVAAAADDEEGGGG	FFLLSSSSYY??CC?WLLLLPPPPHHQQRRRRIIIMTTTTNNKKSSRKVVVVAAAADDEEGGGG	1	AGG	R	K	365	439332	No	tRNA(CCU) appears to be arginine-type due to A20				0.69
GCA_900092415.1-AGG	343	B	GCA_900092415.1	Xanthomonas translucens pv. graminis	FALSE	FFLLSSSSYY**CC*WLLLLPPPPHHQQRRRRIIIMTTTTNNKKSSRRVVVVAAAADDEEGGGG	FFLLSSSSYY??CC?WLLLLPPPPHHQQRRRRIIIMTTTTNNKKSSRKVVVVAAAADDEEGGGG	1	AGG	R	K	365	439887	No	tRNA(CCU) appears to be arginine-type due to A20				0.69
GCA_900092425.1-AGG	343	B	GCA_900092425.1	Xanthomonas translucens pv. graminis ART-Xtg29	FALSE	FFLLSSSSYY**CC*WLLLLPPPPHHQQRRRRIIIMTTTTNNKKSSRRVVVVAAAADDEEGGGG	FFLLSSSSYY??CC?WLLLLPPPPHHQQRRRRIIIMTTTTNNKKSSRKVVVVAAAADDEEGGGG	1	AGG	R	K	368	438124	No	tRNA(CCU) appears to be arginine-type due to A20				0.69
GCA_900092485.1-AGG	343	B	GCA_900092485.1	Xanthomonas translucens pv. graminis	FALSE	FFLLSSSSYY**CC*WLLLLPPPPHHQQRRRRIIIMTTTTNNKKSSRRVVVVAAAADDEEGGGG	FFLLSSSSYY??CC?WLLLLPPPPHHQQRRRRIIIMTTTTNNKKSSRKVVVVAAAADDEEGGGG	1	AGG	R	K	364	440299	No	tRNA(CCU) appears to be arginine-type due to A20				0.69
GCA_900092495.1-AGG	343	B	GCA_900092495.1	Xanthomonas translucens pv. graminis	FALSE	FFLLSSSSYY**CC*WLLLLPPPPHHQQRRRRIIIMTTTTNNKKSSRRVVVVAAAADDEEGGGG	FFLLSSSSYY??CC?WLLLLPPPPHHQQRRRRIIIMTTTTNNKKSSRKVVVVAAAADDEEGGGG	1	AGG	R	K	363	435225	No	tRNA(CCU) appears to be arginine-type due to A20				0.69
GCA_900092565.1-AGG	343	B	GCA_900092565.1	Xanthomonas translucens pv. graminis	FALSE	FFLLSSSSYY**CC*WLLLLPPPPHHQQRRRRIIIMTTTTNNKKSSRRVVVVAAAADDEEGGGG	FFLLSSSSYY??CC?WLLLLPPPPHHQQRRRRIIIMTTTTNNKKSSRKVVVVAAAADDEEGGGG	1	AGG	R	K	371	448861	No	tRNA(CCU) appears to be arginine-type due to A20				0.69
GCA_900094325.1-AGG	343	B	GCA_900094325.1	Xanthomonas translucens pv. translucens DSM 18974	FALSE	FFLLSSSSYY**CC*WLLLLPPPPHHQQRRRRIIIMTTTTNNKKSSRRVVVVAAAADDEEGGGG	FFLLSSSSYY??CC?WLLLLPPPPHHQQRRRRIIIMTTTTNNKKSSRKVVVVAAAADDEEGGGG	1	AGG	R	K	388	437011	No	tRNA(CCU) appears to be arginine-type due to A20				0.68
GCA_000817975.1-AGG	353	B	GCA_000817975.1	Azotobacter chroococcum NCIMB 8003	TRUE	FFLLSSSSYY**CC*WLLLLPPPPHHQQRRRRIIIMTTTTNNKKSSRRVVVVAAAADDEEGGGG	FFLLSSSSYY??CC?WLLLLPPPPHHQQRRRRIIIMTTTTNNKKSSRKVVVVAAAADDEEGGGG	1	AGG	R	K	1263	539131	No	tRNA(CCU) appears to be arginine-type due to A20				0.66
GCA_002220155.1-AGG	353	B	GCA_002220155.1	Azotobacter chroococcum	FALSE	FFLLSSSSYY**CC*WLLLLPPPPHHQQRRRRIIIMTTTTNNKKSSRRVVVVAAAADDEEGGGG	FFLLSSSSYY??CC?WLLLLPPPPHHQQRRRRIIIMTTTTNNKKSSRKVVVVAAAADDEEGGGG	1	AGG	R	K	1219	526639	No	tRNA(CCU) appears to be arginine-type due to A20				0.66
GCA_004327885.1-AGG	353	B	GCA_004327885.1	Azotobacter chroococcum	FALSE	FFLLSSSSYY**CC*WLLLLPPPPHHQQRRRRIIIMTTTTNNKKSSRRVVVVAAAADDEEGGGG	FFLLSSSSYY??CC?WLLLLPPPPHHQQRRRRIIIMTTTTNNKKSSRKVVVVAAAADDEEGGGG	1	AGG	R	K	1153	511868	No	tRNA(CCU) appears to be arginine-type due to A20				0.67
GCA_004327895.1-AGG	353	B	GCA_004327895.1	Azotobacter chroococcum subsp. isscasi	FALSE	FFLLSSSSYY**CC*WLLLLPPPPHHQQRRRRIIIMTTTTNNKKSSRRVVVVAAAADDEEGGGG	FFLLSSSSYY??CC?WLLLLPPPPHHQQRRRRIIIMTTTTNNKKSSRKVVVVAAAADDEEGGGG	1	AGG	R	K	1299	516769	No	tRNA(CCU) appears to be arginine-type due to A20				0.67
GCA_004327905.1-AGG	353	B	GCA_004327905.1	Azotobacter chroococcum	FALSE	FFLLSSSSYY**CC*WLLLLPPPPHHQQRRRRIIIMTTTTNNKKSSRRVVVVAAAADDEEGGGG	FFLLSSSSYY??CC?WLLLLPPPPHHQQRRRRIIIMTTTTNNKKSSRKVVVVAAAADDEEGGGG	1	AGG	R	K	1254	538437	No	tRNA(CCU) appears to be arginine-type due to A20				0.66
GCA_004327955.1-AGG	353	B	GCA_004327955.1	Azotobacter chroococcum	FALSE	FFLLSSSSYY**CC*WLLLLPPPPHHQQRRRRIIIMTTTTNNKKSSRRVVVVAAAADDEEGGGG	FFLLSSSSYY??CC?WLLLLPPPPHHQQRRRRIIIMTTTTNNKKSSRKVVVVAAAADDEEGGGG	1	AGG	R	K	1253	536376	No	tRNA(CCU) appears to be arginine-type due to A20				0.66
GCA_004339665.1-AGG	353	B	GCA_004339665.1	Azotobacter chroococcum	FALSE	FFLLSSSSYY**CC*WLLLLPPPPHHQQRRRRIIIMTTTTNNKKSSRRVVVVAAAADDEEGGGG	FFLLSSSSYY??CC?WLLLLPPPPHHQQRRRRIIIMTTTTNNKKSSRKVVVVAAAADDEEGGGG	1	AGG	R	K	1246	536222	No	tRNA(CCU) appears to be arginine-type due to A20				0.66
GCA_005144545.1-AGG	353	B	GCA_005144545.1	Azotobacter chroococcum	FALSE	FFLLSSSSYY**CC*WLLLLPPPPHHQQRRRRIIIMTTTTNNKKSSRRVVVVAAAADDEEGGGG	FFLLSSSSYY??CC?WLLLLPPPPHHQQRRRRIIIMTTTTNNKKSSRKVVVVAAAADDEEGGGG	1	AGG	R	K	1328	561446	No	tRNA(CCU) appears to be arginine-type due to A20				0.66
GCA_011470035.1-AGG	353	B	GCA_011470035.1	Azotobacter chroococcum	FALSE	FFLLSSSSYY**CC*WLLLLPPPPHHQQRRRRIIIMTTTTNNKKSSRRVVVVAAAADDEEGGGG	FFLLSSSSYY??CC?WLLLLPPPPHHQQRRRRIIIMTTTTNNKKSSRKVVVVAAAADDEEGGGG	1	AGG	R	K	1294	515476	No	tRNA(CCU) appears to be arginine-type due to A20				0.67
GCA_000021045.1-AGG	354	B	GCA_000021045.1	Azotobacter vinelandii DJ	TRUE	FFLLSSSSYY**CC*WLLLLPPPPHHQQRRRRIIIMTTTTNNKKSSRRVVVVAAAADDEEGGGG	FFLLSSSSYY??CC?WLLLLPPPPHHQQRRRRIIIMTTTTNNKKSSRKVVVVAAAADDEEGGGG	1	AGG	R	K	1541	592866	No	tRNA(CCU) appears to be arginine-type due to A20				0.66
GCA_000380335.1-AGG	354	B	GCA_000380335.1	Azotobacter vinelandii CA	FALSE	FFLLSSSSYY**CC*WLLLLPPPPHHQQRRRRIIIMTTTTNNKKSSRRVVVVAAAADDEEGGGG	FFLLSSSSYY??CC?WLLLLPPPPHHQQRRRRIIIMTTTTNNKKSSRKVVVVAAAADDEEGGGG	1	AGG	R	K	1542	592410	No	tRNA(CCU) appears to be arginine-type due to A20				0.66
GCA_000380365.1-AGG	354	B	GCA_000380365.1	Azotobacter vinelandii CA6	FALSE	FFLLSSSSYY**CC*WLLLLPPPPHHQQRRRRIIIMTTTTNNKKSSRRVVVVAAAADDEEGGGG	FFLLSSSSYY??CC?WLLLLPPPPHHQQRRRRIIIMTTTTNNKKSSRKVVVVAAAADDEEGGGG	1	AGG	R	K	1522	589492	No	tRNA(CCU) appears to be arginine-type due to A20				0.66
GCA_001571105.1-AGG	354	B	GCA_001571105.1	Azotobacter vinelandii NBRC 13581	FALSE	FFLLSSSSYY**CC*WLLLLPPPPHHQQRRRRIIIMTTTTNNKKSSRRVVVVAAAADDEEGGGG	FFLLSSSSYY??CC?WLLLLPPPPHHQQRRRRIIIMTTTTNNKKSSRKVVVVAAAADDEEGGGG	1	AGG	R	K	1618	618022	No	tRNA(CCU) appears to be arginine-type due to A20				0.66
GCA_900119555.1-AGG	354	B	GCA_900119555.1	Azotobacter vinelandii	FALSE	FFLLSSSSYY**CC*WLLLLPPPPHHQQRRRRIIIMTTTTNNKKSSRRVVVVAAAADDEEGGGG	FFLLSSSSYY??CC?WLLLLPPPPHHQQRRRRIIIMTTTTNNKKSSRKVVVVAAAADDEEGGGG	1	AGG	R	K	1650	627162	No	tRNA(CCU) appears to be arginine-type due to A20				0.65
GCA_004551805.1-AGG	853	B	GCA_004551805.1	Faecalibacterium prausnitzii	FALSE	FFLLSSSSYY**CC*WLLLLPPPPHHQQRRRRIIIMTTTTNNKKSSRRVVVVAAAADDEEGGGG	FFLLSSSSYY??CC?WLLLLPPPPHHQQRRRRIIIMTTTTNNKKSSRKVVVVAAAADDEEGGGG	1	AGG	R	K	178	229189	No	tRNA(CCU) appears to be arginine-type due to A20				0.61
GCA_004554025.1-AGG	853	B	GCA_004554025.1	Faecalibacterium prausnitzii	FALSE	FFLLSSSSYY**CC*WLLLLPPPPHHQQRRRRIIIMTTTTNNKKSSRRVVVVAAAADDEEGGGG	FFLLSSSSYY??CC?WLLLLPPPPHHQQRRRRIIIMTTTTNNKKSS?KVVVVAAAADDEEGGGG	1	AGG	R	K	164	205057	No	tRNA(CCU) appears to be arginine-type due to A20				0.61
GCA_009782025.1-AGG	895	B	GCA_009782025.1	Desulfobulbus sp.	FALSE	FFLLSSSSYY**CC*WLLLLPPPPHHQQRRRRIIIMTTTTNNKKSSRRVVVVAAAADDEEGGGG	FFLLSSSSYY??CC?WLLLLPPPPHHQQRRRRIIIMTTTTNNKKSSRKVVVVAAAADDEEGGGG	1	AGG	R	K	502	294381	No	No tRNA(CCU), Arg-type tRNA(UCU)				0.64
GCA_900116045.1-AGG	901	B	GCA_900116045.1	Desulfovibrio piger	TRUE	FFLLSSSSYY**CC*WLLLLPPPPHHQQRRRRIIIMTTTTNNKKSSRRVVVVAAAADDEEGGGG	FFLLSSSSYY??CC?WLLLLPPPPHHQQRRRRIIIMTTTTNNKKSSRKVVVVAAAADDEEGGGG	1	AGG	R	K	802	256019	No	tRNA(CCU) appears to be arginine-type due to A20				0.64
GCA_000423825.1-AGG	929	B	GCA_000423825.1	Thermithiobacillus tepidarius DSM 3134	TRUE	FFLLSSSSYY**CC*WLLLLPPPPHHQQRRRRIIIMTTTTNNKKSSRRVVVVAAAADDEEGGGG	FFLLSSSSYY??CC?WLLLLPPPPHHQQRRRRIIIMTTTTNNKKSSRKVVVVAAAADDEEGGGG	1	AGG	R	K	342	329242	No	tRNA(CCU) appears to be arginine-type due to A20				0.67
GCA_009664085.1-AGG	1050	B	GCA_009664085.1	Thermochromatium tepidum ATCC 43061	TRUE	FFLLSSSSYY**CC*WLLLLPPPPHHQQRRRRIIIMTTTTNNKKSSRRVVVVAAAADDEEGGGG	FFLLSSSSYY??CC?WLLLLPPPPHHQQRRRRIIIMTTTTNNKKSSRKVVVVAAAADDEEGGGG	1	AGG	R	K	903	333640	No	tRNA(CCU) appears to be arginine-type due to A20				0.63
GCA_000176875.1-AGG	1270	B	GCA_000176875.1	Micrococcus luteus SK58	FALSE	FFLLSSSSYY**CC*WLLLLPPPPHHQQRRRRIIIMTTTTNNKKSSRRVVVVAAAADDEEGGGG	FFLLSSSSYY??CC?WLLLLPPPPHHQQRRRRIIIMTTTTNNKKSSRKVVVVAAAADDEEGGGG	1	AGG	R	K	166	241225	No	tRNA(CCU) appears to be arginine-type due to A20				0.73
GCA_000309825.2-AGG	1270	B	GCA_000309825.2	Micrococcus luteus str. modasa	FALSE	FFLLSSSSYY**CC*WLLLLPPPPHHQQRRRRIIIMTTTTNNKKSSRRVVVVAAAADDEEGGGG	FF?LSSSSYY??CC?WLLLLPPPPHHQQRRRRII?MTTTTNNKKSSRKVVVVAAAADDEEGGGG	1	AGG	R	K	99	245970	No	tRNA(CCU) appears to be arginine-type due to A20				0.73
GCA_001543375.1-AGG	1270	B	GCA_001543375.1	Micrococcus luteus	FALSE	FFLLSSSSYY**CC*WLLLLPPPPHHQQRRRRIIIMTTTTNNKKSSRRVVVVAAAADDEEGGGG	FF?LSSSSYY??CC?WLLLLPPPPHHQQRRRRII?MTTTTNNKKSSRKVVVVAAAADDEEGGGG	1	AGG	R	K	166	230343	No	tRNA(CCU) appears to be arginine-type due to A20				0.73
GCA_003530855.1-AGG	1270	B	GCA_003530855.1	Micrococcus luteus	FALSE	FFLLSSSSYY**CC*WLLLLPPPPHHQQRRRRIIIMTTTTNNKKSSRRVVVVAAAADDEEGGGG	FF?LSSSSYY??CC?WLLLLPPPPHHQQRRRRII?MTTTTNNKKSS?KVVVVAAAADDEEGGGG	1	AGG	R	K	128	168724	No	tRNA(CCU) appears to be arginine-type due to A20				0.73
GCA_013041635.1-AGG	1270	B	GCA_013041635.1	Micrococcus luteus	FALSE	FFLLSSSSYY**CC*WLLLLPPPPHHQQRRRRIIIMTTTTNNKKSSRRVVVVAAAADDEEGGGG	FF?LSSSSYY??CC?WLLLLPPPPHHQQRRRRII?MTTTTNNKKSS?KVVVVAAAADDEEGGGG	1	AGG	R	K	183	240489	No	tRNA(CCU) appears to be arginine-type due to A20				0.73
GCA_900163885.1-AGG	1270	B	GCA_900163885.1	Micrococcus luteus Mu201	FALSE	FFLLSSSSYY**CC*WLLLLPPPPHHQQRRRRIIIMTTTTNNKKSSRRVVVVAAAADDEEGGGG	FF?LSSSSYY??CC?WLLLLPPPPHHQQRRRRII?MTTTTNNKKSS?KVVVVAAAADDEEGGGG	1	AGG	R	K	161	228519	No	tRNA(CCU) appears to be arginine-type due to A20				0.73
GCA_900453025.1-AGG	1270	B	GCA_900453025.1	Micrococcus luteus	FALSE	FFLLSSSSYY**CC*WLLLLPPPPHHQQRRRRIIIMTTTTNNKKSSRRVVVVAAAADDEEGGGG	FF?LSSSSYY??CC?WLLLLPPPPHHQQRRRRII?MTTTTNNKKSSRKVV?VAAAADDEEGGGG	1	AGG	R	K	132	208862	No	tRNA(CCU) appears to be arginine-type due to A20				0.73
GCA_901542305.1-AGG	1334	B	GCA_901542305.1	Streptococcus dysgalactiae subsp. equisimilis	FALSE	FFLLSSSSYY**CC*WLLLLPPPPHHQQRRRRIIIMTTTTNNKKSSRRVVVVAAAADDEEGGGG	FFLLSSSSYY??CC?WLLLLPPPPHHQQRRRRIIIMTTTTNNKKSSRKVVVVAAAADDEEGGGG	1	AGG	R	K	1261	735679	No	tRNA(CCU) appears to be arginine-type due to A20				0.67
GCA_000711965.1-AGG	1659	B	GCA_000711965.1	Actinomyces israelii DSM 43320	FALSE	FFLLSSSSYY**CC*WLLLLPPPPHHQQRRRRIIIMTTTTNNKKSSRRVVVVAAAADDEEGGGG	FFLLSSSSYY??CC?WLLLLPPPPHHQQRRRRIIIMTTTTNNKKSSRKVVVVAAAADDEEGGGG	1	AGG	R	K	1512	301053	No	tRNA(CCU) appears to be arginine-type due to A20				0.71
GCA_900115395.1-AGG	1861	B	GCA_900115395.1	Geodermatophilus obscurus	FALSE	FFLLSSSSYY**CC*WLLLLPPPPHHQQRRRRIIIMTTTTNNKKSSRRVVVVAAAADDEEGGGG	FF?LSSSSYY??CC?WLLLLPPPPHHQQRRRRII?MTTTTNNKKSS?K?VVVAAAADDEEGGGG	1	AGG	R	K	337	361557	No	tRNA(CCU) appears to be arginine-type due to A20				0.75
GCA_900143215.1-AGG	1861	B	GCA_900143215.1	Geodermatophilus obscurus	FALSE	FFLLSSSSYY**CC*WLLLLPPPPHHQQRRRRIIIMTTTTNNKKSSRRVVVVAAAADDEEGGGG	FF?LSSSSYY??CC?WLLLLPPPPHHQQRRRRII?MTTTTNNKKSS?KVVVVAAAADDEEGGGG	1	AGG	R	K	405	383858	No	tRNA(CCU) appears to be arginine-type due to A20				0.74
GCA_003711105.1-AGG	1867	B	GCA_003711105.1	Actinoplanes teichomyceticus ATCC 31121	TRUE	FFLLSSSSYY**CC*WLLLLPPPPHHQQRRRRIIIMTTTTNNKKSSRRVVVVAAAADDEEGGGG	FFLLSSSSYY??CC?WLLLLPPPPHHQQRRRRIIIMTTTTNNKKSSRKVVVVAAAADDEEGGGG	1	AGG	R	K	603	540000	No	tRNA(CCU) appears to be arginine-type due to A20				0.73
GCA_007829915.1-AGG	1867	B	GCA_007829915.1	Actinoplanes teichomyceticus	FALSE	FFLLSSSSYY**CC*WLLLLPPPPHHQQRRRRIIIMTTTTNNKKSSRRVVVVAAAADDEEGGGG	FFLLSSSSYY??CC?WLLLLPPPPHHQQRRRRIIIMTTTTNNKKSSRKVVVVAAAADDEEGGGG	1	AGG	R	K	598	536735	No	tRNA(CCU) appears to be arginine-type due to A20				0.73
GCA_008271795.1-AGG	1867	B	GCA_008271795.1	Actinoplanes teichomyceticus	FALSE	FFLLSSSSYY**CC*WLLLLPPPPHHQQRRRRIIIMTTTTNNKKSSRRVVVVAAAADDEEGGGG	FFLLSSSSYY??CC?WLLLLPPPPHHQQRRRRIIIMTTTTNNKKSSRKVVVVAAAADDEEGGGG	1	AGG	R	K	595	534279	No	tRNA(CCU) appears to be arginine-type due to A20				0.73
GCA_000761215.1-AGG	1907	B	GCA_000761215.1	Streptomyces glaucescens	TRUE	FFLLSSSSYY**CC*WLLLLPPPPHHQQRRRRIIIMTTTTNNKKSSRRVVVVAAAADDEEGGGG	FF?LSSSSYY??CC?WLLLLPPPPHHQQRRRRIIIMTTTTNNKKSSRKVVVVAAAADDEEGGGG	1	AGG	R	K	1147	530950	No	tRNA(CCU) appears to be arginine-type due to A20				0.73
GCA_002155915.1-AGG	1934	B	GCA_002155915.1	Streptomyces thermovulgaris	TRUE	FFLLSSSSYY**CC*WLLLLPPPPHHQQRRRRIIIMTTTTNNKKSSRRVVVVAAAADDEEGGGG	FFLLSSSSYY??CC?WLLLLPPPPHHQQRRRRIIIMTTTTNNKKSSRKVVVVAAAADDEEGGGG	1	AGG	R	K	1843	519324	No	No tRNA(CCU), Arg-type tRNA(UCU)				0.72
GCA_004340905.1-AGG	28068	B	GCA_004340905.1	Rubrivivax gelatinosus	FALSE	FFLLSSSSYY**CC*WLLLLPPPPHHQQRRRRIIIMTTTTNNKKSSRRVVVVAAAADDEEGGGG	FFLLSSSSYY??CC?WLLLLPPPPHHQQRRRRIIIMTTTTNNKKSSRKVVVVAAAADDEEGGGG	1	AGG	R	K	375	494677	No	tRNA(CCU) appears to be arginine-type due to A20				0.71
GCA_001527485.1-AGG	28095	B	GCA_001527485.1	Burkholderia gladioli	FALSE	FFLLSSSSYY**CC*WLLLLPPPPHHQQRRRRIIIMTTTTNNKKSSRRVVVVAAAADDEEGGGG	FFLLSSSSYY??CC?WLLLLPPPPHHQQRRRRIIIMTTTTNNKKSSRKVVVVAAAADDEEGGGG	1	AGG	R	K	878	741066	No	tRNA(CCU) appears to be arginine-type due to A20				0.68
GCA_002980975.1-AGG	28095	B	GCA_002980975.1	Burkholderia gladioli	FALSE	FFLLSSSSYY**CC*WLLLLPPPPHHQQRRRRIIIMTTTTNNKKSSRRVVVVAAAADDEEGGGG	FFLLSSSSYY??CC?WLLLLPPPPHHQQRRRRIIIMTTTTNNKKSSRKVVVVAAAADDEEGGGG	1	AGG	R	K	871	757730	No	tRNA(CCU) appears to be arginine-type due to A20				0.68
GCA_009911875.1-AGG	28095	B	GCA_009911875.1	Burkholderia gladioli	FALSE	FFLLSSSSYY**CC*WLLLLPPPPHHQQRRRRIIIMTTTTNNKKSSRRVVVVAAAADDEEGGGG	FFLLSSSSYY??CC?WLLLLPPPPHHQQRRRRIIIMTTTTNNKKSSRKVVVVAAAADDEEGGGG	1	AGG	R	K	282	185905	No	No tRNA(CCU), Arg-type tRNA(UCU)				0.59
GCA_011319435.1-AGG	28095	B	GCA_011319435.1	Burkholderia gladioli	FALSE	FFLLSSSSYY**CC*WLLLLPPPPHHQQRRRRIIIMTTTTNNKKSSRRVVVVAAAADDEEGGGG	FFLLSSSSYY??CC?WLLLLPPPPHHQQRRRRIIIMTTTTNNKKSSRKVVVVAAAADDEEGGGG	1	AGG	R	K	867	732285	No	tRNA(CCU) appears to be arginine-type due to A20				0.68
GCA_900608515.1-AGG	28095	B	GCA_900608515.1	Burkholderia gladioli	FALSE	FFLLSSSSYY**CC*WLLLLPPPPHHQQRRRRIIIMTTTTNNKKSSRRVVVVAAAADDEEGGGG	FFLLSSSSYY??CC?WLLLLPPPPHHQQRRRRIIIMTTTTNNKKSSRKVVVVAAAADDEEGGGG	1	AGG	R	K	899	782102	No	tRNA(CCU) appears to be arginine-type due to A20				0.68
GCA_003248585.1-AGG	29317	B	GCA_003248585.1	Actinomyces sp.	FALSE	FFLLSSSSYY**CC*WLLLLPPPPHHQQRRRRIIIMTTTTNNKKSSRRVVVVAAAADDEEGGGG	FF?LSSSSYY??CC?WLLLLPPPPHHQQRRRRIIIMTTTTNNKKSSRKVVVVAAAADDEEGGGG	1	AGG	R	K	1287	298935	No	tRNA(CCU) appears to be arginine-type due to A20				0.71
GCA_000024845.1-AGG	29549	B	GCA_000024845.1	Rhodothermus marinus DSM 4252	TRUE	FFLLSSSSYY**CC*WLLLLPPPPHHQQRRRRIIIMTTTTNNKKSSRRVVVVAAAADDEEGGGG	FFLLSSSSYY??CC?WLLLLPPPPHHQQRRRRIIIMTTTTNNKKSSRKVVVVAAAADDEEGGGG	1	AGG	R	K	218	349407	No	tRNA(CCU) appears to be arginine-type due to A20				0.64
GCA_000224745.1-AGG	29549	B	GCA_000224745.1	Rhodothermus marinus SG0.5JP17-172	FALSE	FFLLSSSSYY**CC*WLLLLPPPPHHQQRRRRIIIMTTTTNNKKSSRRVVVVAAAADDEEGGGG	FFLLSSSSYY??CC?WLLLLPPPPHHQQRRRRIIIMTTTTNNKKSSRKVVVVAAAADDEEGGGG	1	AGG	R	K	251	346514	No	tRNA(CCU) appears to be arginine-type due to A20				0.64
GCA_000565305.1-AGG	29549	B	GCA_000565305.1	Rhodothermus marinus SG0.5JP17-171	FALSE	FFLLSSSSYY**CC*WLLLLPPPPHHQQRRRRIIIMTTTTNNKKSSRRVVVVAAAADDEEGGGG	FFLLSSSSYY??CC?WLLLLPPPPHHQQRRRRIIIMTTTTNNKKSSRKVVVVAAAADDEEGGGG	1	AGG	R	K	252	346847	No	tRNA(CCU) appears to be arginine-type due to A20				0.64
GCA_001312245.1-AGG	29549	B	GCA_001312245.1	Rhodothermus marinus JCM 9785	FALSE	FFLLSSSSYY**CC*WLLLLPPPPHHQQRRRRIIIMTTTTNNKKSSRRVVVVAAAADDEEGGGG	FFLLSSSSYY??CC?WLLLLPPPPHHQQRRRRIIIMTTTTNNKKSSRKVVVVAAAADDEEGGGG	1	AGG	R	K	177	312952	No	tRNA(CCU) appears to be arginine-type due to A20				0.64
GCA_009936255.1-AGG	29549	B	GCA_009936255.1	Rhodothermus marinus	FALSE	FFLLSSSSYY**CC*WLLLLPPPPHHQQRRRRIIIMTTTTNNKKSSRRVVVVAAAADDEEGGGG	FFLLSSSSYY??CC?WLLLLPPPPHHQQRRRRIIIMTTTTNNKKSSRKVVVVAAAADDEEGGGG	1	AGG	R	K	243	353471	No	tRNA(CCU) appears to be arginine-type due to A20				0.64
GCA_009936275.1-AGG	29549	B	GCA_009936275.1	Rhodothermus marinus	FALSE	FFLLSSSSYY**CC*WLLLLPPPPHHQQRRRRIIIMTTTTNNKKSSRRVVVVAAAADDEEGGGG	FFLLSSSSYY??CC?WLLLLPPPPHHQQRRRRIIIMTTTTNNKKSSRKVVVVAAAADDEEGGGG	1	AGG	R	K	258	356714	No	tRNA(CCU) appears to be arginine-type due to A20				0.64
GCA_002338195.1-AGG	32002	B	GCA_002338195.1	Achromobacter denitrificans	FALSE	FFLLSSSSYY**CC*WLLLLPPPPHHQQRRRRIIIMTTTTNNKKSSRRVVVVAAAADDEEGGGG	FFLLSSSSYY??CC?WLLLLPPPPHHQQRRRRIIIMTTTTNNKKSSRKVVVVAAAADDEEGGGG	1	AGG	R	K	436	550942	No	No tRNA(CCU), Arg-type tRNA(UCU)				0.68
GCA_003990665.2-AGG	32053	B	GCA_003990665.2	Thermosynechococcus vulcanus NIES-2134	TRUE	FFLLSSSSYY**CC*WLLLLPPPPHHQQRRRRIIIMTTTTNNKKSSRRVVVVAAAADDEEGGGG	FFLLSSSSYY??CC?WLLLLPPPPHHQQRRRRIIIMTTTTNNKKSSRKVVVVAAAADDEEGGGG	1	AGG	R	K	454	320115	No	tRNA(CCU) appears to be arginine-type due to A20				0.54
GCA_000429625.1-AGG	34010	B	GCA_000429625.1	Azospirillum halopraeferens DSM 3675	TRUE	FFLLSSSSYY**CC*WLLLLPPPPHHQQRRRRIIIMTTTTNNKKSSRRVVVVAAAADDEEGGGG	FF?LSSSSYY??CC?WLLLLPPPPHHQQRRRRIIIMTTTTNNKKSSRKVVVVAAAADDEEGGGG	1	AGG	R	K	618	575986	No	No tRNA(CCU), Arg-type tRNA(UCU)				0.71
GCA_009360615.1-AGG	34028	B	GCA_009360615.1	Comamonas sp.	TRUE	FFLLSSSSYY**CC*WLLLLPPPPHHQQRRRRIIIMTTTTNNKKSSRRVVVVAAAADDEEGGGG	FFLLSSSSYY??CC?WLLLLPPPPHHQQRRRRIIIMTTTTNNKKSSRKVVVVAAAADDEEGGGG	1	AGG	R	K	1592	554818	No	tRNA(CCU) appears to be arginine-type due to A20				0.62
GCA_000019785.1-AGG	34029	B	GCA_000019785.1	Leptothrix cholodnii SP-6	TRUE	FFLLSSSSYY**CC*WLLLLPPPPHHQQRRRRIIIMTTTTNNKKSSRRVVVVAAAADDEEGGGG	FFLLSSSSYY??CC?WLLLLPPPPHHQQRRRRIIIMTTTTNNKKSSRKVVVVAAAADDEEGGGG	1	AGG	R	K	352	480002	No	tRNA(CCU) appears to be arginine-type due to A20				0.69
GCA_001399565.1-AGG	34073	B	GCA_001399565.1	Variovorax paradoxus	FALSE	FFLLSSSSYY**CC*WLLLLPPPPHHQQRRRRIIIMTTTTNNKKSSRRVVVVAAAADDEEGGGG	FFLLSSSSYY??CC?WLLLLPPPPHHQQRRRRIIIMTTTTNNKKSSRKVVVVAAAADDEEGGGG	1	AGG	R	K	1140	939493	No	tRNA(CCU) appears to be arginine-type due to A20				0.69
GCA_001399595.1-AGG	34073	B	GCA_001399595.1	Variovorax paradoxus	FALSE	FFLLSSSSYY**CC*WLLLLPPPPHHQQRRRRIIIMTTTTNNKKSSRRVVVVAAAADDEEGGGG	FFLLSSSSYY??CC?WLLLLPPPPHHQQRRRRIIIMTTTTNNKKSSRKVVVVAAAADDEEGGGG	1	AGG	R	K	1172	969209	No	tRNA(CCU) appears to be arginine-type due to A20				0.69
GCA_001399625.1-AGG	34073	B	GCA_001399625.1	Variovorax paradoxus	FALSE	FFLLSSSSYY**CC*WLLLLPPPPHHQQRRRRIIIMTTTTNNKKSSRRVVVVAAAADDEEGGGG	FFLLSSSSYY??CC?WLLLLPPPPHHQQRRRRIIIMTTTTNNKKSSRKVVVVAAAADDEEGGGG	1	AGG	R	K	1179	956665	No	tRNA(CCU) appears to be arginine-type due to A20				0.69
GCA_003241585.1-AGG	34073	B	GCA_003241585.1	Variovorax paradoxus	FALSE	FFLLSSSSYY**CC*WLLLLPPPPHHQQRRRRIIIMTTTTNNKKSSRRVVVVAAAADDEEGGGG	FFLLSSSSYY??CC?WLLLLPPPPHHQQRRRRIIIMTTTTNNKKSSRKVVVVAAAADDEEGGGG	1	AGG	R	K	974	822417	No	tRNA(CCU) appears to be arginine-type due to A20				0.69
GCA_003241635.1-AGG	34073	B	GCA_003241635.1	Variovorax paradoxus	FALSE	FFLLSSSSYY**CC*WLLLLPPPPHHQQRRRRIIIMTTTTNNKKSSRRVVVVAAAADDEEGGGG	FFLLSSSSYY??CC?WLLLLPPPPHHQQRRRRIIIMTTTTNNKKSSRKVVVVAAAADDEEGGGG	1	AGG	R	K	974	822417	No	tRNA(CCU) appears to be arginine-type due to A20				0.69
GCA_008329925.1-AGG	34103	B	GCA_008329925.1	Sphaerotilus natans subsp. sulfidivorans	TRUE	FFLLSSSSYY**CC*WLLLLPPPPHHQQRRRRIIIMTTTTNNKKSSRRVVVVAAAADDEEGGGG	FF?LSSSSYY??CC?WLLLLPPPPHHQQRRRRIIIMTTTTNNKKSSRKVVVVAAAADDEEGGGG	1	AGG	R	K	353	423969	No	tRNA(CCU) appears to be arginine-type due to A20				0.7
GCA_000284595.1-AGG	40324	B	GCA_000284595.1	Stenotrophomonas maltophilia D457	FALSE	FFLLSSSSYY**CC*WLLLLPPPPHHQQRRRRIIIMTTTTNNKKSSRRVVVVAAAADDEEGGGG	FFLLSSSSYY??CC?WLLLLPPPPHHQQRRRRIIIMTTTTNNKKSSRKVVVVAAAADDEEGGGG	1	AGG	R	K	417	466399	No	tRNA(CCU) appears to be arginine-type due to A20				0.67
GCA_000295735.2-AGG	40324	B	GCA_000295735.2	Stenotrophomonas maltophilia S028	FALSE	FFLLSSSSYY**CC*WLLLLPPPPHHQQRRRRIIIMTTTTNNKKSSRRVVVVAAAADDEEGGGG	FF?LSSSSYY??CC?WLLLLPPPPHHQQRRRRIIIMTTTTNNKKSSRKVVVVAAAADDEEGGGG	1	AGG	R	K	472	429302	No	tRNA(CCU) appears to be arginine-type due to A20				0.67
GCA_000611735.2-AGG	40324	B	GCA_000611735.2	Stenotrophomonas maltophilia M30	FALSE	FFLLSSSSYY**CC*WLLLLPPPPHHQQRRRRIIIMTTTTNNKKSSRRVVVVAAAADDEEGGGG	FFLLSSSSYY??CC?WLLLLPPPPHHQQRRRRIIIMTTTTNNKKSSRKVVVVAAAADDEEGGGG	1	AGG	R	K	443	495047	No	tRNA(CCU) appears to be arginine-type due to A20				0.66
GCA_000978875.1-AGG	40324	B	GCA_000978875.1	Stenotrophomonas maltophilia	FALSE	FFLLSSSSYY**CC*WLLLLPPPPHHQQRRRRIIIMTTTTNNKKSSRRVVVVAAAADDEEGGGG	FFLLSSSSYY??CC?WLLLLPPPPHHQQRRRRIIIMTTTTNNKKSSRKVVVVAAAADDEEGGGG	1	AGG	R	K	463	489125	No	tRNA(CCU) appears to be arginine-type due to A20				0.67
GCA_001020915.1-AGG	40324	B	GCA_001020915.1	Stenotrophomonas maltophilia	FALSE	FFLLSSSSYY**CC*WLLLLPPPPHHQQRRRRIIIMTTTTNNKKSSRRVVVVAAAADDEEGGGG	FFLLSSSSYY??CC?WLLLLPPPPHHQQRRRRIIIMTTTTNNKKSS?KVVVVAAAADDEEGGGG	1	AGG	R	K	347	415231	No	tRNA(CCU) appears to be arginine-type due to A20				0.67
GCA_001068765.1-AGG	40324	B	GCA_001068765.1	Stenotrophomonas maltophilia	FALSE	FFLLSSSSYY**CC*WLLLLPPPPHHQQRRRRIIIMTTTTNNKKSSRRVVVVAAAADDEEGGGG	FFLLSSSSYY??CC?WLLLLPPPPHHQQRRRRIIIMTTTTNNKKSSRKVVVVAAAADDEEGGGG	1	AGG	R	K	454	459514	No	tRNA(CCU) appears to be arginine-type due to A20				0.67
GCA_001069345.1-AGG	40324	B	GCA_001069345.1	Stenotrophomonas maltophilia	FALSE	FFLLSSSSYY**CC*WLLLLPPPPHHQQRRRRIIIMTTTTNNKKSSRRVVVVAAAADDEEGGGG	FFLLSSSSYY??CC?WLLLLPPPPHHQQRRRRIIIMTTTTNNKKSSRKVVVVAAAADDEEGGGG	1	AGG	R	K	489	486494	No	tRNA(CCU) appears to be arginine-type due to A20				0.67
GCA_001069405.1-AGG	40324	B	GCA_001069405.1	Stenotrophomonas maltophilia	FALSE	FFLLSSSSYY**CC*WLLLLPPPPHHQQRRRRIIIMTTTTNNKKSSRRVVVVAAAADDEEGGGG	FFLLSSSSYY??CC?WLLLLPPPPHHQQRRRRIIIMTTTTNNKKSSRKVVVVAAAADDEEGGGG	1	AGG	R	K	486	477980	No	tRNA(CCU) appears to be arginine-type due to A20				0.67
GCA_001069435.1-AGG	40324	B	GCA_001069435.1	Stenotrophomonas maltophilia	FALSE	FFLLSSSSYY**CC*WLLLLPPPPHHQQRRRRIIIMTTTTNNKKSSRRVVVVAAAADDEEGGGG	FFLLSSSSYY??CC?WLLLLPPPPHHQQRRRRIIIMTTTTNNKKSSRKVVVVAAAADDEEGGGG	1	AGG	R	K	440	482961	No	tRNA(CCU) appears to be arginine-type due to A20				0.67
GCA_001069565.1-AGG	40324	B	GCA_001069565.1	Stenotrophomonas maltophilia	FALSE	FFLLSSSSYY**CC*WLLLLPPPPHHQQRRRRIIIMTTTTNNKKSSRRVVVVAAAADDEEGGGG	FFLLSSSSYY??CC?WLLLLPPPPHHQQRRRRIIIMTTTTNNKKSSRKVVVVAAAADDEEGGGG	1	AGG	R	K	447	492540	No	tRNA(CCU) appears to be arginine-type due to A20				0.67
GCA_001069595.1-AGG	40324	B	GCA_001069595.1	Stenotrophomonas maltophilia	FALSE	FFLLSSSSYY**CC*WLLLLPPPPHHQQRRRRIIIMTTTTNNKKSSRRVVVVAAAADDEEGGGG	FFLLSSSSYY??CC?WLLLLPPPPHHQQRRRRIIIMTTTTNNKKSSRKVVVVAAAADDEEGGGG	1	AGG	R	K	460	495749	No	tRNA(CCU) appears to be arginine-type due to A20				0.67
GCA_001069685.1-AGG	40324	B	GCA_001069685.1	Stenotrophomonas maltophilia	FALSE	FFLLSSSSYY**CC*WLLLLPPPPHHQQRRRRIIIMTTTTNNKKSSRRVVVVAAAADDEEGGGG	FFLLSSSSYY??CC?WLLLLPPPPHHQQRRRRIIIMTTTTNNKKSS?KVVVVAAAADDEEGGGG	1	AGG	R	K	467	496848	No	tRNA(CCU) appears to be arginine-type due to A20				0.67
GCA_001070185.1-AGG	40324	B	GCA_001070185.1	Stenotrophomonas maltophilia	FALSE	FFLLSSSSYY**CC*WLLLLPPPPHHQQRRRRIIIMTTTTNNKKSSRRVVVVAAAADDEEGGGG	FFLLSSSSYY??CC?WLLLLPPPPHHQQRRRRIIIMTTTTNNKKSSRKVVVVAAAADDEEGGGG	1	AGG	R	K	480	478257	No	tRNA(CCU) appears to be arginine-type due to A20				0.67
GCA_001071115.1-AGG	40324	B	GCA_001071115.1	Stenotrophomonas maltophilia	FALSE	FFLLSSSSYY**CC*WLLLLPPPPHHQQRRRRIIIMTTTTNNKKSSRRVVVVAAAADDEEGGGG	FFLLSSSSYY??CC?WLLLLPPPPHHQQRRRRIIIMTTTTNNKKSS?KVVVVAAAADDEEGGGG	1	AGG	R	K	402	466845	No	tRNA(CCU) appears to be arginine-type due to A20				0.67
GCA_001074685.1-AGG	40324	B	GCA_001074685.1	Stenotrophomonas maltophilia	FALSE	FFLLSSSSYY**CC*WLLLLPPPPHHQQRRRRIIIMTTTTNNKKSSRRVVVVAAAADDEEGGGG	FF?LSSSSYY??CC?WLLLLPPPPHHQQRRRRIIIMTTTTNNKKSS?KVVVVAAAADDEEGGGG	1	AGG	R	K	383	479535	No	tRNA(CCU) appears to be arginine-type due to A20				0.67
GCA_001075445.1-AGG	40324	B	GCA_001075445.1	Stenotrophomonas maltophilia	FALSE	FFLLSSSSYY**CC*WLLLLPPPPHHQQRRRRIIIMTTTTNNKKSSRRVVVVAAAADDEEGGGG	FFLLSSSSYY??CC?WLLLLPPPPHHQQRRRRIIIMTTTTNNKKSSRKVVVVAAAADDEEGGGG	1	AGG	R	K	441	495295	No	tRNA(CCU) appears to be arginine-type due to A20				0.67
GCA_001075985.1-AGG	40324	B	GCA_001075985.1	Stenotrophomonas maltophilia	FALSE	FFLLSSSSYY**CC*WLLLLPPPPHHQQRRRRIIIMTTTTNNKKSSRRVVVVAAAADDEEGGGG	FFLLSSSSYY??CC?WLLLLPPPPHHQQRRRRIIIMTTTTNNKKSSRKVVVVAAAADDEEGGGG	1	AGG	R	K	443	499780	No	tRNA(CCU) appears to be arginine-type due to A20				0.67
GCA_001274595.1-AGG	40324	B	GCA_001274595.1	Stenotrophomonas maltophilia	FALSE	FFLLSSSSYY**CC*WLLLLPPPPHHQQRRRRIIIMTTTTNNKKSSRRVVVVAAAADDEEGGGG	FF?LSSSSYY??CC?WLLLLPPPPHHQQRRRRIIIMTTTTNNKKSSRKVVVVAAAADDEEGGGG	1	AGG	R	K	336	462689	No	tRNA(CCU) appears to be arginine-type due to A20				0.67
GCA_001275075.1-AGG	40324	B	GCA_001275075.1	Stenotrophomonas maltophilia	FALSE	FFLLSSSSYY**CC*WLLLLPPPPHHQQRRRRIIIMTTTTNNKKSSRRVVVVAAAADDEEGGGG	FFLLSSSSYY??CC?WLLLLPPPPHHQQRRRRIIIMTTTTNNKKSSRKVVVVAAAADDEEGGGG	1	AGG	R	K	418	474926	No	tRNA(CCU) appears to be arginine-type due to A20				0.67
GCA_001276185.1-AGG	40324	B	GCA_001276185.1	Stenotrophomonas maltophilia	FALSE	FFLLSSSSYY**CC*WLLLLPPPPHHQQRRRRIIIMTTTTNNKKSSRRVVVVAAAADDEEGGGG	FFLLSSSSYY??CC?WLLLLPPPPHHQQRRRRIIIMTTTTNNKKSS?KVVVVAAAADDEEGGGG	1	AGG	R	K	468	499986	No	tRNA(CCU) appears to be arginine-type due to A20				0.67
GCA_001276305.1-AGG	40324	B	GCA_001276305.1	Stenotrophomonas maltophilia	FALSE	FFLLSSSSYY**CC*WLLLLPPPPHHQQRRRRIIIMTTTTNNKKSSRRVVVVAAAADDEEGGGG	FFLLSSSSYY??CC?WLLLLPPPPHHQQRRRRIIIMTTTTNNKKSS?KVVVVAAAADDEEGGGG	1	AGG	R	K	388	486815	No	tRNA(CCU) appears to be arginine-type due to A20				0.67
GCA_001276385.1-AGG	40324	B	GCA_001276385.1	Stenotrophomonas maltophilia	FALSE	FFLLSSSSYY**CC*WLLLLPPPPHHQQRRRRIIIMTTTTNNKKSSRRVVVVAAAADDEEGGGG	FF?LSSSSYY??CC?WLLLLPPPPHHQQRRRRIIIMTTTTNNKKSS?KVVVVAAAADDEEGGGG	1	AGG	R	K	374	484480	No	tRNA(CCU) appears to be arginine-type due to A20				0.67
GCA_001431665.1-AGG	40324	B	GCA_001431665.1	Stenotrophomonas maltophilia	FALSE	FFLLSSSSYY**CC*WLLLLPPPPHHQQRRRRIIIMTTTTNNKKSSRRVVVVAAAADDEEGGGG	FF?LSSSSYY??CC?WLLLLPPPPHHQQRRRRIIIMTTTTNNKKSSRKVVVVAAAADDEEGGGG	1	AGG	R	K	440	463463	No	tRNA(CCU) appears to be arginine-type due to A20				0.67
GCA_001499715.1-AGG	40324	B	GCA_001499715.1	Stenotrophomonas maltophilia	FALSE	FFLLSSSSYY**CC*WLLLLPPPPHHQQRRRRIIIMTTTTNNKKSSRRVVVVAAAADDEEGGGG	FFLLSSSSYY??CC?WLLLLPPPPHHQQRRRRIIIMTTTTNNKKSSRKVVVVAAAADDEEGGGG	1	AGG	R	K	406	450160	No	tRNA(CCU) appears to be arginine-type due to A20				0.67
GCA_001516595.1-AGG	40324	B	GCA_001516595.1	Stenotrophomonas maltophilia	FALSE	FFLLSSSSYY**CC*WLLLLPPPPHHQQRRRRIIIMTTTTNNKKSSRRVVVVAAAADDEEGGGG	FF?LSSSSYY??CC?WLLLLPPPPHHQQRRRRIIIMTTTTNNKKSS?KVVVVAAAADDEEGGGG	1	AGG	R	K	443	518234	No	tRNA(CCU) appears to be arginine-type due to A20				0.67
GCA_001676385.1-AGG	40324	B	GCA_001676385.1	Stenotrophomonas maltophilia	FALSE	FFLLSSSSYY**CC*WLLLLPPPPHHQQRRRRIIIMTTTTNNKKSSRRVVVVAAAADDEEGGGG	FFLLSSSSYY??CC?WLLLLPPPPHHQQRRRRIIIMTTTTNNKKSSRKVVVVAAAADDEEGGGG	1	AGG	R	K	675	427386	No	tRNA(CCU) appears to be arginine-type due to A20				0.67
GCA_002189545.2-AGG	40324	B	GCA_002189545.2	Stenotrophomonas maltophilia	FALSE	FFLLSSSSYY**CC*WLLLLPPPPHHQQRRRRIIIMTTTTNNKKSSRRVVVVAAAADDEEGGGG	FFLLSSSSYY??CC?WLLLLPPPPHHQQRRRRIIIMTTTTNNKKSSRKVVVVAAAADDEEGGGG	1	AGG	R	K	423	470046	No	tRNA(CCU) appears to be arginine-type due to A20				0.67
GCA_002205225.1-AGG	40324	B	GCA_002205225.1	Stenotrophomonas maltophilia	FALSE	FFLLSSSSYY**CC*WLLLLPPPPHHQQRRRRIIIMTTTTNNKKSSRRVVVVAAAADDEEGGGG	FFLLSSSSYY??CC?WLLLLPPPPHHQQRRRRIIIMTTTTNNKKSSRKVVVVAAAADDEEGGGG	1	AGG	R	K	466	497218	No	tRNA(CCU) appears to be arginine-type due to A20				0.67
GCA_002205275.1-AGG	40324	B	GCA_002205275.1	Stenotrophomonas maltophilia	FALSE	FFLLSSSSYY**CC*WLLLLPPPPHHQQRRRRIIIMTTTTNNKKSSRRVVVVAAAADDEEGGGG	FF?LSSSSYY??CC?WLLLLPPPPHHQQRRRRIIIMTTTTNNKKSS?KVVVVAAAADDEEGGGG	1	AGG	R	K	432	478370	No	tRNA(CCU) appears to be arginine-type due to A20				0.67
GCA_002316475.1-AGG	40324	B	GCA_002316475.1	Stenotrophomonas maltophilia	FALSE	FFLLSSSSYY**CC*WLLLLPPPPHHQQRRRRIIIMTTTTNNKKSSRRVVVVAAAADDEEGGGG	FF?LSSSSYY??CC?WLLLLPPPPHHQQRRRRIIIMTTTTNNKKSS?KVVVVAAAADDEEGGGG	1	AGG	R	K	254	457997	No	tRNA(CCU) appears to be arginine-type due to A20				0.67
GCA_002322815.1-AGG	40324	B	GCA_002322815.1	Stenotrophomonas maltophilia	FALSE	FFLLSSSSYY**CC*WLLLLPPPPHHQQRRRRIIIMTTTTNNKKSSRRVVVVAAAADDEEGGGG	FF?LSSSSYY??CC?WLLLLPPPPHHQQRRRRIIIMTTTTNNKKSS?KVVVVAAAADDEEGGGG	1	AGG	R	K	362	397719	No	tRNA(CCU) appears to be arginine-type due to A20				0.68
GCA_002335325.1-AGG	40324	B	GCA_002335325.1	Stenotrophomonas maltophilia	FALSE	FFLLSSSSYY**CC*WLLLLPPPPHHQQRRRRIIIMTTTTNNKKSSRRVVVVAAAADDEEGGGG	FFLLSSSSYY??CC?WLLLLPPPPHHQQRRRRIIIMTTTTNNKKSSRKVVVVAAAADDEEGGGG	1	AGG	R	K	395	469786	No	tRNA(CCU) appears to be arginine-type due to A20				0.67
GCA_002365215.1-AGG	40324	B	GCA_002365215.1	Stenotrophomonas maltophilia	FALSE	FFLLSSSSYY**CC*WLLLLPPPPHHQQRRRRIIIMTTTTNNKKSSRRVVVVAAAADDEEGGGG	FF?LSSSSYY??CC?WLLLLPPPPHHQQRRRRIIIMTTTTNNKKSS?KVVVVAAAADDEEGGGG	1	AGG	R	K	282	414947	No	tRNA(CCU) appears to be arginine-type due to A20				0.67
GCA_002365915.1-AGG	40324	B	GCA_002365915.1	Stenotrophomonas maltophilia	FALSE	FFLLSSSSYY**CC*WLLLLPPPPHHQQRRRRIIIMTTTTNNKKSSRRVVVVAAAADDEEGGGG	FFLLSSSSYY??CC?WLLLLPPPPHHQQRRRRIIIMTTTTNNKKSSRKVVVVAAAADDEEGGGG	1	AGG	R	K	325	445577	No	tRNA(CCU) appears to be arginine-type due to A20				0.68
GCA_002378345.1-AGG	40324	B	GCA_002378345.1	Stenotrophomonas maltophilia	FALSE	FFLLSSSSYY**CC*WLLLLPPPPHHQQRRRRIIIMTTTTNNKKSSRRVVVVAAAADDEEGGGG	FF?LSSSSYY??CC?WLLLLPPPPHHQQRRRRIIIMTTTTNNKKSSRKVVVVAAAADDEEGGGG	1	AGG	R	K	357	455424	No	tRNA(CCU) appears to be arginine-type due to A20				0.67
GCA_002387785.1-AGG	40324	B	GCA_002387785.1	Stenotrophomonas maltophilia	FALSE	FFLLSSSSYY**CC*WLLLLPPPPHHQQRRRRIIIMTTTTNNKKSSRRVVVVAAAADDEEGGGG	FFLLSSSSYY??CC?WLLLLPPPPHHQQRRRRIIIMTTTTNNKKSSRKVVVVAAAADDEEGGGG	1	AGG	R	K	370	409345	No	tRNA(CCU) appears to be arginine-type due to A20				0.67
GCA_002389885.1-AGG	40324	B	GCA_002389885.1	Stenotrophomonas maltophilia	FALSE	FFLLSSSSYY**CC*WLLLLPPPPHHQQRRRRIIIMTTTTNNKKSSRRVVVVAAAADDEEGGGG	FF?LSSSSYY??CC?WLLLLPPPPHHQQRRRRIIIMTTTTNNKKSSRKVVVVAAAADDEEGGGG	1	AGG	R	K	299	457140	No	tRNA(CCU) appears to be arginine-type due to A20				0.67
GCA_002392005.1-AGG	40324	B	GCA_002392005.1	Stenotrophomonas maltophilia	FALSE	FFLLSSSSYY**CC*WLLLLPPPPHHQQRRRRIIIMTTTTNNKKSSRRVVVVAAAADDEEGGGG	FF?LSSSSYY??CC?WLLLLPPPPHHQQRRRRIIIMTTTTNNKKSS?KVVVVAAAADDEEGGGG	1	AGG	R	K	363	443864	No	tRNA(CCU) appears to be arginine-type due to A20				0.67
GCA_002420585.1-AGG	40324	B	GCA_002420585.1	Stenotrophomonas maltophilia	FALSE	FFLLSSSSYY**CC*WLLLLPPPPHHQQRRRRIIIMTTTTNNKKSSRRVVVVAAAADDEEGGGG	FF?LSSSSYY??CC?WLLLLPPPPHHQQRRRRIIIMTTTTNNKKSS?KVVVVAAAADDEEGGGG	1	AGG	R	K	340	439280	No	tRNA(CCU) appears to be arginine-type due to A20				0.67
GCA_002439195.1-AGG	40324	B	GCA_002439195.1	Stenotrophomonas maltophilia	FALSE	FFLLSSSSYY**CC*WLLLLPPPPHHQQRRRRIIIMTTTTNNKKSSRRVVVVAAAADDEEGGGG	FF?LSSSSYY??CC?WLLLLPPPPHHQQRRRRIIIMTTTTNNKKSSRKVVVVAAAADDEEGGGG	1	AGG	R	K	414	454177	No	tRNA(CCU) appears to be arginine-type due to A20				0.67
GCA_002440415.1-AGG	40324	B	GCA_002440415.1	Stenotrophomonas maltophilia	FALSE	FFLLSSSSYY**CC*WLLLLPPPPHHQQRRRRIIIMTTTTNNKKSSRRVVVVAAAADDEEGGGG	FF?LSSSSYY??CC?WLLLLPPPPHHQQRRRRIIIMTTTTNNKKSS?KVVVVAAAADDEEGGGG	1	AGG	R	K	321	365323	No	tRNA(CCU) appears to be arginine-type due to A20				0.67
GCA_002440445.1-AGG	40324	B	GCA_002440445.1	Stenotrophomonas maltophilia	FALSE	FFLLSSSSYY**CC*WLLLLPPPPHHQQRRRRIIIMTTTTNNKKSSRRVVVVAAAADDEEGGGG	FF?LSSSSYY??CC?WLLLLPPPPHHQQRRRRIIIMTTTTNNKKSSRKVVVVAAAADDEEGGGG	1	AGG	R	K	417	461445	No	tRNA(CCU) appears to be arginine-type due to A20				0.67
GCA_002739005.1-AGG	40324	B	GCA_002739005.1	Stenotrophomonas maltophilia	FALSE	FFLLSSSSYY**CC*WLLLLPPPPHHQQRRRRIIIMTTTTNNKKSSRRVVVVAAAADDEEGGGG	FF?LSSSSYY??CC?WLLLLPPPPHHQQRRRRIIIMTTTTNNKKSSRKVVVVAAAADDEEGGGG	1	AGG	R	K	448	452585	No	tRNA(CCU) appears to be arginine-type due to A20				0.67
GCA_002739025.1-AGG	40324	B	GCA_002739025.1	Stenotrophomonas maltophilia	FALSE	FFLLSSSSYY**CC*WLLLLPPPPHHQQRRRRIIIMTTTTNNKKSSRRVVVVAAAADDEEGGGG	FF?LSSSSYY??CC?WLLLLPPPPHHQQRRRRIIIMTTTTNNKKSSRKVVVVAAAADDEEGGGG	1	AGG	R	K	440	454443	No	tRNA(CCU) appears to be arginine-type due to A20				0.67
GCA_002739065.1-AGG	40324	B	GCA_002739065.1	Stenotrophomonas maltophilia	FALSE	FFLLSSSSYY**CC*WLLLLPPPPHHQQRRRRIIIMTTTTNNKKSSRRVVVVAAAADDEEGGGG	FF?LSSSSYY??CC?WLLLLPPPPHHQQRRRRIIIMTTTTNNKKSSRKVVVVAAAADDEEGGGG	1	AGG	R	K	441	450112	No	tRNA(CCU) appears to be arginine-type due to A20				0.67
GCA_002739075.1-AGG	40324	B	GCA_002739075.1	Stenotrophomonas maltophilia	FALSE	FFLLSSSSYY**CC*WLLLLPPPPHHQQRRRRIIIMTTTTNNKKSSRRVVVVAAAADDEEGGGG	FF?LSSSSYY??CC?WLLLLPPPPHHQQRRRRIIIMTTTTNNKKSSRKVVVVAAAADDEEGGGG	1	AGG	R	K	455	457203	No	tRNA(CCU) appears to be arginine-type due to A20				0.67
GCA_002739095.1-AGG	40324	B	GCA_002739095.1	Stenotrophomonas maltophilia	FALSE	FFLLSSSSYY**CC*WLLLLPPPPHHQQRRRRIIIMTTTTNNKKSSRRVVVVAAAADDEEGGGG	FF?LSSSSYY??CC?WLLLLPPPPHHQQRRRRIIIMTTTTNNKKSSRKVVVVAAAADDEEGGGG	1	AGG	R	K	444	452968	No	tRNA(CCU) appears to be arginine-type due to A20				0.67
GCA_002739105.1-AGG	40324	B	GCA_002739105.1	Stenotrophomonas maltophilia	FALSE	FFLLSSSSYY**CC*WLLLLPPPPHHQQRRRRIIIMTTTTNNKKSSRRVVVVAAAADDEEGGGG	FF?LSSSSYY??CC?WLLLLPPPPHHQQRRRRIIIMTTTTNNKKSSRKVVVVAAAADDEEGGGG	1	AGG	R	K	451	455493	No	tRNA(CCU) appears to be arginine-type due to A20				0.67
GCA_002739145.1-AGG	40324	B	GCA_002739145.1	Stenotrophomonas maltophilia	FALSE	FFLLSSSSYY**CC*WLLLLPPPPHHQQRRRRIIIMTTTTNNKKSSRRVVVVAAAADDEEGGGG	FF?LSSSSYY??CC?WLLLLPPPPHHQQRRRRIIIMTTTTNNKKSSRKVVVVAAAADDEEGGGG	1	AGG	R	K	453	461034	No	tRNA(CCU) appears to be arginine-type due to A20				0.67
GCA_002739465.1-AGG	40324	B	GCA_002739465.1	Stenotrophomonas maltophilia	FALSE	FFLLSSSSYY**CC*WLLLLPPPPHHQQRRRRIIIMTTTTNNKKSSRRVVVVAAAADDEEGGGG	FFLLSSSSYY??CC?WLLLLPPPPHHQQRRRRIIIMTTTTNNKKSS?KVVVVAAAADDEEGGGG	1	AGG	R	K	431	453831	No	tRNA(CCU) appears to be arginine-type due to A20				0.67
GCA_002739505.1-AGG	40324	B	GCA_002739505.1	Stenotrophomonas maltophilia	FALSE	FFLLSSSSYY**CC*WLLLLPPPPHHQQRRRRIIIMTTTTNNKKSSRRVVVVAAAADDEEGGGG	FFLLSSSSYY??CC?WLLLLPPPPHHQQRRRRIIIMTTTTNNKKSS?KVVVVAAAADDEEGGGG	1	AGG	R	K	435	457406	No	tRNA(CCU) appears to be arginine-type due to A20				0.67
GCA_002739555.1-AGG	40324	B	GCA_002739555.1	Stenotrophomonas maltophilia	FALSE	FFLLSSSSYY**CC*WLLLLPPPPHHQQRRRRIIIMTTTTNNKKSSRRVVVVAAAADDEEGGGG	FFLLSSSSYY??CC?WLLLLPPPPHHQQRRRRIIIMTTTTNNKKSSRKVVVVAAAADDEEGGGG	1	AGG	R	K	442	476714	No	tRNA(CCU) appears to be arginine-type due to A20				0.66
GCA_002739785.1-AGG	40324	B	GCA_002739785.1	Stenotrophomonas maltophilia	FALSE	FFLLSSSSYY**CC*WLLLLPPPPHHQQRRRRIIIMTTTTNNKKSSRRVVVVAAAADDEEGGGG	FF?LSSSSYY??CC?WLLLLPPPPHHQQRRRRIIIMTTTTNNKKSSRKVVVVAAAADDEEGGGG	1	AGG	R	K	451	453440	No	tRNA(CCU) appears to be arginine-type due to A20				0.67
GCA_002739825.1-AGG	40324	B	GCA_002739825.1	Stenotrophomonas maltophilia	FALSE	FFLLSSSSYY**CC*WLLLLPPPPHHQQRRRRIIIMTTTTNNKKSSRRVVVVAAAADDEEGGGG	FF?LSSSSYY??CC?WLLLLPPPPHHQQRRRRIIIMTTTTNNKKSSRKVVVVAAAADDEEGGGG	1	AGG	R	K	445	453138	No	tRNA(CCU) appears to be arginine-type due to A20				0.67
GCA_002739835.1-AGG	40324	B	GCA_002739835.1	Stenotrophomonas maltophilia	FALSE	FFLLSSSSYY**CC*WLLLLPPPPHHQQRRRRIIIMTTTTNNKKSSRRVVVVAAAADDEEGGGG	FF?LSSSSYY??CC?WLLLLPPPPHHQQRRRRIIIMTTTTNNKKSSRKVVVVAAAADDEEGGGG	1	AGG	R	K	454	452488	No	tRNA(CCU) appears to be arginine-type due to A20				0.67
GCA_002739855.1-AGG	40324	B	GCA_002739855.1	Stenotrophomonas maltophilia	FALSE	FFLLSSSSYY**CC*WLLLLPPPPHHQQRRRRIIIMTTTTNNKKSSRRVVVVAAAADDEEGGGG	FF?LSSSSYY??CC?WLLLLPPPPHHQQRRRRIIIMTTTTNNKKSSRKVVVVAAAADDEEGGGG	1	AGG	R	K	448	453424	No	tRNA(CCU) appears to be arginine-type due to A20				0.67
GCA_002739875.1-AGG	40324	B	GCA_002739875.1	Stenotrophomonas maltophilia	FALSE	FFLLSSSSYY**CC*WLLLLPPPPHHQQRRRRIIIMTTTTNNKKSSRRVVVVAAAADDEEGGGG	FF?LSSSSYY??CC?WLLLLPPPPHHQQRRRRIIIMTTTTNNKKSSRKVVVVAAAADDEEGGGG	1	AGG	R	K	459	458678	No	tRNA(CCU) appears to be arginine-type due to A20				0.67
GCA_002739905.1-AGG	40324	B	GCA_002739905.1	Stenotrophomonas maltophilia	FALSE	FFLLSSSSYY**CC*WLLLLPPPPHHQQRRRRIIIMTTTTNNKKSSRRVVVVAAAADDEEGGGG	FF?LSSSSYY??CC?WLLLLPPPPHHQQRRRRIIIMTTTTNNKKSSRKVVVVAAAADDEEGGGG	1	AGG	R	K	448	456865	No	tRNA(CCU) appears to be arginine-type due to A20				0.67
GCA_002739945.1-AGG	40324	B	GCA_002739945.1	Stenotrophomonas maltophilia	FALSE	FFLLSSSSYY**CC*WLLLLPPPPHHQQRRRRIIIMTTTTNNKKSSRRVVVVAAAADDEEGGGG	FF?LSSSSYY??CC?WLLLLPPPPHHQQRRRRIIIMTTTTNNKKSSRKVVVVAAAADDEEGGGG	1	AGG	R	K	448	460633	No	tRNA(CCU) appears to be arginine-type due to A20				0.67
GCA_002740215.1-AGG	40324	B	GCA_002740215.1	Stenotrophomonas maltophilia	FALSE	FFLLSSSSYY**CC*WLLLLPPPPHHQQRRRRIIIMTTTTNNKKSSRRVVVVAAAADDEEGGGG	FFLLSSSSYY??CC?WLLLLPPPPHHQQRRRRIIIMTTTTNNKKSS?KVVVVAAAADDEEGGGG	1	AGG	R	K	438	458056	No	tRNA(CCU) appears to be arginine-type due to A20				0.67
GCA_002740245.1-AGG	40324	B	GCA_002740245.1	Stenotrophomonas maltophilia	FALSE	FFLLSSSSYY**CC*WLLLLPPPPHHQQRRRRIIIMTTTTNNKKSSRRVVVVAAAADDEEGGGG	FFLLSSSSYY??CC?WLLLLPPPPHHQQRRRRIIIMTTTTNNKKSS?KVVVVAAAADDEEGGGG	1	AGG	R	K	435	455935	No	tRNA(CCU) appears to be arginine-type due to A20				0.67
GCA_002740255.1-AGG	40324	B	GCA_002740255.1	Stenotrophomonas maltophilia	FALSE	FFLLSSSSYY**CC*WLLLLPPPPHHQQRRRRIIIMTTTTNNKKSSRRVVVVAAAADDEEGGGG	FFLLSSSSYY??CC?WLLLLPPPPHHQQRRRRIIIMTTTTNNKKSS?KVVVVAAAADDEEGGGG	1	AGG	R	K	431	453648	No	tRNA(CCU) appears to be arginine-type due to A20				0.67
GCA_002799105.1-AGG	40324	B	GCA_002799105.1	Stenotrophomonas maltophilia	FALSE	FFLLSSSSYY**CC*WLLLLPPPPHHQQRRRRIIIMTTTTNNKKSSRRVVVVAAAADDEEGGGG	FF?LSSSSYY??CC?WLLLLPPPPHHQQRRRRIIIMTTTTNNKKSSRKVVVVAAAADDEEGGGG	1	AGG	R	K	377	453354	No	tRNA(CCU) appears to be arginine-type due to A20				0.67
GCA_002799215.1-AGG	40324	B	GCA_002799215.1	Stenotrophomonas maltophilia	FALSE	FFLLSSSSYY**CC*WLLLLPPPPHHQQRRRRIIIMTTTTNNKKSSRRVVVVAAAADDEEGGGG	FFLLSSSSYY??CC?WLLLLPPPPHHQQRRRRIIIMTTTTNNKKSSRKVVVVAAAADDEEGGGG	1	AGG	R	K	430	449660	No	tRNA(CCU) appears to be arginine-type due to A20				0.67
GCA_002799245.1-AGG	40324	B	GCA_002799245.1	Stenotrophomonas maltophilia	FALSE	FFLLSSSSYY**CC*WLLLLPPPPHHQQRRRRIIIMTTTTNNKKSSRRVVVVAAAADDEEGGGG	FF?LSSSSYY??CC?WLLLLPPPPHHQQRRRRIIIMTTTTNNKKSSRKVVVVAAAADDEEGGGG	1	AGG	R	K	409	465654	No	tRNA(CCU) appears to be arginine-type due to A20				0.67
GCA_003244495.1-AGG	40324	B	GCA_003244495.1	Stenotrophomonas maltophilia	FALSE	FFLLSSSSYY**CC*WLLLLPPPPHHQQRRRRIIIMTTTTNNKKSSRRVVVVAAAADDEEGGGG	FFLLSSSSYY??CC?WLLLLPPPPHHQQRRRRIIIMTTTTNNKKSSRKVVVVAAAADDEEGGGG	1	AGG	R	K	427	456008	No	tRNA(CCU) appears to be arginine-type due to A20				0.67
GCA_003244505.1-AGG	40324	B	GCA_003244505.1	Stenotrophomonas maltophilia	FALSE	FFLLSSSSYY**CC*WLLLLPPPPHHQQRRRRIIIMTTTTNNKKSSRRVVVVAAAADDEEGGGG	FF?LSSSSYY??CC?WLLLLPPPPHHQQRRRRIIIMTTTTNNKKSSRKVVVVAAAADDEEGGGG	1	AGG	R	K	427	449943	No	tRNA(CCU) appears to be arginine-type due to A20				0.67
GCA_003244535.1-AGG	40324	B	GCA_003244535.1	Stenotrophomonas maltophilia	FALSE	FFLLSSSSYY**CC*WLLLLPPPPHHQQRRRRIIIMTTTTNNKKSSRRVVVVAAAADDEEGGGG	FF?LSSSSYY??CC?WLLLLPPPPHHQQRRRRIIIMTTTTNNKKSSRKVVVVAAAADDEEGGGG	1	AGG	R	K	381	461734	No	tRNA(CCU) appears to be arginine-type due to A20				0.67
GCA_003244785.1-AGG	40324	B	GCA_003244785.1	Stenotrophomonas maltophilia	FALSE	FFLLSSSSYY**CC*WLLLLPPPPHHQQRRRRIIIMTTTTNNKKSSRRVVVVAAAADDEEGGGG	FFLLSSSSYY??CC?WLLLLPPPPHHQQRRRRIIIMTTTTNNKKSSRKVVVVAAAADDEEGGGG	1	AGG	R	K	421	448454	No	tRNA(CCU) appears to be arginine-type due to A20				0.67
GCA_003244795.1-AGG	40324	B	GCA_003244795.1	Stenotrophomonas maltophilia	FALSE	FFLLSSSSYY**CC*WLLLLPPPPHHQQRRRRIIIMTTTTNNKKSSRRVVVVAAAADDEEGGGG	FFLLSSSSYY??CC?WLLLLPPPPHHQQRRRRIIIMTTTTNNKKSS?KVVVVAAAADDEEGGGG	1	AGG	R	K	393	445273	No	tRNA(CCU) appears to be arginine-type due to A20				0.67
GCA_003487985.1-AGG	40324	B	GCA_003487985.1	Stenotrophomonas maltophilia	FALSE	FFLLSSSSYY**CC*WLLLLPPPPHHQQRRRRIIIMTTTTNNKKSSRRVVVVAAAADDEEGGGG	FF?LSSSSYY??CC?WLLLLPPPPHHQQRRRRIIIMTTTTNNKKSS?KVVVVAAAADDEEGGGG	1	AGG	R	K	311	355769	No	tRNA(CCU) appears to be arginine-type due to A20				0.66
GCA_004522395.1-AGG	40324	B	GCA_004522395.1	Stenotrophomonas maltophilia	FALSE	FFLLSSSSYY**CC*WLLLLPPPPHHQQRRRRIIIMTTTTNNKKSSRRVVVVAAAADDEEGGGG	FFLLSSSSYY??CC?WLLLLPPPPHHQQRRRRIIIMTTTTNNKKSSRKVVVVAAAADDEEGGGG	1	AGG	R	K	449	459228	No	tRNA(CCU) appears to be arginine-type due to A20				0.67
GCA_004522525.1-AGG	40324	B	GCA_004522525.1	Stenotrophomonas maltophilia	FALSE	FFLLSSSSYY**CC*WLLLLPPPPHHQQRRRRIIIMTTTTNNKKSSRRVVVVAAAADDEEGGGG	FFLLSSSSYY??CC?WLLLLPPPPHHQQRRRRIIIMTTTTNNKKSSRKVVVVAAAADDEEGGGG	1	AGG	R	K	440	452376	No	tRNA(CCU) appears to be arginine-type due to A20				0.67
GCA_004794075.1-AGG	40324	B	GCA_004794075.1	Stenotrophomonas maltophilia	FALSE	FFLLSSSSYY**CC*WLLLLPPPPHHQQRRRRIIIMTTTTNNKKSSRRVVVVAAAADDEEGGGG	FFLLSSSSYY??CC?WLLLLPPPPHHQQRRRRIIIMTTTTNNKKSSRKVVVVAAAADDEEGGGG	1	AGG	R	K	444	434456	No	tRNA(CCU) appears to be arginine-type due to A20				0.68
GCA_006120765.1-AGG	40324	B	GCA_006120765.1	Stenotrophomonas maltophilia	FALSE	FFLLSSSSYY**CC*WLLLLPPPPHHQQRRRRIIIMTTTTNNKKSSRRVVVVAAAADDEEGGGG	FFLLSSSSYY??CC?WLLLLPPPPHHQQRRRRIIIMTTTTNNKKSSRKVVVVAAAADDEEGGGG	1	AGG	R	K	373	449232	No	tRNA(CCU) appears to be arginine-type due to A20				0.67
GCA_006716455.1-AGG	40324	B	GCA_006716455.1	Stenotrophomonas maltophilia	FALSE	FFLLSSSSYY**CC*WLLLLPPPPHHQQRRRRIIIMTTTTNNKKSSRRVVVVAAAADDEEGGGG	FF?LSSSSYY??CC?WLLLLPPPPHHQQRRRRIIIMTTTTNNKKSS?KVVVVAAAADDEEGGGG	1	AGG	R	K	376	448128	No	tRNA(CCU) appears to be arginine-type due to A20				0.67
GCA_008326785.1-AGG	40324	B	GCA_008326785.1	Stenotrophomonas maltophilia	FALSE	FFLLSSSSYY**CC*WLLLLPPPPHHQQRRRRIIIMTTTTNNKKSSRRVVVVAAAADDEEGGGG	FF?LSSSSYY??CC?WLLLLPPPPHHQQRRRRIIIMTTTTNNKKSSRKVVVVAAAADDEEGGGG	1	AGG	R	K	372	448532	No	tRNA(CCU) appears to be arginine-type due to A20				0.66
GCA_008710035.1-AGG	40324	B	GCA_008710035.1	Stenotrophomonas maltophilia	FALSE	FFLLSSSSYY**CC*WLLLLPPPPHHQQRRRRIIIMTTTTNNKKSSRRVVVVAAAADDEEGGGG	FFLLSSSSYY??CC?WLLLLPPPPHHQQRRRRIIIMTTTTNNKKSS?KVVVVAAAADDEEGGGG	1	AGG	R	K	279	431514	No	tRNA(CCU) appears to be arginine-type due to A20				0.67
GCA_009676485.1-AGG	40324	B	GCA_009676485.1	Stenotrophomonas maltophilia	FALSE	FFLLSSSSYY**CC*WLLLLPPPPHHQQRRRRIIIMTTTTNNKKSSRRVVVVAAAADDEEGGGG	FFLLSSSSYY??CC?WLLLLPPPPHHQQRRRRIIIMTTTTNNKKSSRKVVVVAAAADDEEGGGG	1	AGG	R	K	405	460302	No	tRNA(CCU) appears to be arginine-type due to A20				0.67
GCA_009676545.1-AGG	40324	B	GCA_009676545.1	Stenotrophomonas maltophilia	FALSE	FFLLSSSSYY**CC*WLLLLPPPPHHQQRRRRIIIMTTTTNNKKSSRRVVVVAAAADDEEGGGG	FF?LSSSSYY??CC?WLLLLPPPPHHQQRRRRIIIMTTTTNNKKSS?KVVVVAAAADDEEGGGG	1	AGG	R	K	379	447387	No	tRNA(CCU) appears to be arginine-type due to A20				0.67
GCA_010604335.1-AGG	40324	B	GCA_010604335.1	Stenotrophomonas maltophilia	FALSE	FFLLSSSSYY**CC*WLLLLPPPPHHQQRRRRIIIMTTTTNNKKSSRRVVVVAAAADDEEGGGG	FFLLSSSSYY??CC?WLLLLPPPPHHQQRRRRIIIMTTTTNNKKSSRKVVVVAAAADDEEGGGG	1	AGG	R	K	433	493117	No	tRNA(CCU) appears to be arginine-type due to A20				0.66
GCA_010607585.1-AGG	40324	B	GCA_010607585.1	Stenotrophomonas maltophilia	FALSE	FFLLSSSSYY**CC*WLLLLPPPPHHQQRRRRIIIMTTTTNNKKSSRRVVVVAAAADDEEGGGG	FFLLSSSSYY??CC?WLLLLPPPPHHQQRRRRIIIMTTTTNNKKSSRKVVVVAAAADDEEGGGG	1	AGG	R	K	423	485262	No	tRNA(CCU) appears to be arginine-type due to A20				0.67
GCA_010607965.1-AGG	40324	B	GCA_010607965.1	Stenotrophomonas maltophilia	FALSE	FFLLSSSSYY**CC*WLLLLPPPPHHQQRRRRIIIMTTTTNNKKSSRRVVVVAAAADDEEGGGG	FFLLSSSSYY??CC?WLLLLPPPPHHQQRRRRIIIMTTTTNNKKSSRKVVVVAAAADDEEGGGG	1	AGG	R	K	443	492262	No	tRNA(CCU) appears to be arginine-type due to A20				0.66
GCA_010608565.1-AGG	40324	B	GCA_010608565.1	Stenotrophomonas maltophilia	FALSE	FFLLSSSSYY**CC*WLLLLPPPPHHQQRRRRIIIMTTTTNNKKSSRRVVVVAAAADDEEGGGG	FFLLSSSSYY??CC?WLLLLPPPPHHQQRRRRIIIMTTTTNNKKSSRKVVVVAAAADDEEGGGG	1	AGG	R	K	441	495676	No	tRNA(CCU) appears to be arginine-type due to A20				0.67
GCA_010608915.1-AGG	40324	B	GCA_010608915.1	Stenotrophomonas maltophilia	FALSE	FFLLSSSSYY**CC*WLLLLPPPPHHQQRRRRIIIMTTTTNNKKSSRRVVVVAAAADDEEGGGG	FFLLSSSSYY??CC?WLLLLPPPPHHQQRRRRIIIMTTTTNNKKSSRKVVVVAAAADDEEGGGG	1	AGG	R	K	386	468826	No	tRNA(CCU) appears to be arginine-type due to A20				0.67
GCA_010994225.1-AGG	40324	B	GCA_010994225.1	Stenotrophomonas maltophilia	FALSE	FFLLSSSSYY**CC*WLLLLPPPPHHQQRRRRIIIMTTTTNNKKSSRRVVVVAAAADDEEGGGG	FFLLSSSSYY??CC?WLLLLPPPPHHQQRRRRIIIMTTTTNNKKSSRKVVVVAAAADDEEGGGG	1	AGG	R	K	426	461675	No	tRNA(CCU) appears to be arginine-type due to A20				0.67
GCA_012956725.1-AGG	40324	B	GCA_012956725.1	Stenotrophomonas maltophilia	FALSE	FFLLSSSSYY**CC*WLLLLPPPPHHQQRRRRIIIMTTTTNNKKSSRRVVVVAAAADDEEGGGG	FF?LSSSSYY??CC?WLLLLPPPPHHQQRRRRIIIMTTTTNNKKSSKKVVVVAAAADDEEGGGG	2	AGG	R	K	379	454635	No	tRNA(CCU) appears to be arginine-type due to A20				0.67
GCA_012956765.1-AGG	40324	B	GCA_012956765.1	Stenotrophomonas maltophilia	FALSE	FFLLSSSSYY**CC*WLLLLPPPPHHQQRRRRIIIMTTTTNNKKSSRRVVVVAAAADDEEGGGG	FF?LSSSSYY??CC?WLLLLPPPPHHQQRRRRIIIMTTTTNNKKSSKKVVVVAAAADDEEGGGG	2	AGG	R	K	373	456776	No	tRNA(CCU) appears to be arginine-type due to A20				0.67
GCA_900113425.1-AGG	40324	B	GCA_900113425.1	Stenotrophomonas maltophilia	FALSE	FFLLSSSSYY**CC*WLLLLPPPPHHQQRRRRIIIMTTTTNNKKSSRRVVVVAAAADDEEGGGG	FF?LSSSSYY??CC?WLLLLPPPPHHQQRRRRIIIMTTTTNNKKSSRKVVVVAAAADDEEGGGG	1	AGG	R	K	540	438219	No	tRNA(CCU) appears to be arginine-type due to A20				0.67
GCA_900475405.1-AGG	40324	B	GCA_900475405.1	Stenotrophomonas maltophilia	FALSE	FFLLSSSSYY**CC*WLLLLPPPPHHQQRRRRIIIMTTTTNNKKSSRRVVVVAAAADDEEGGGG	FF?LSSSSYY??CC?WLLLLPPPPHHQQRRRRIIIMTTTTNNKKSSRKVVVVAAAADDEEGGGG	1	AGG	R	K	379	451470	No	tRNA(CCU) appears to be arginine-type due to A20				0.67
GCA_900636905.1-AGG	40324	B	GCA_900636905.1	Stenotrophomonas maltophilia	FALSE	FFLLSSSSYY**CC*WLLLLPPPPHHQQRRRRIIIMTTTTNNKKSSRRVVVVAAAADDEEGGGG	FF?LSSSSYY??CC?WLLLLPPPPHHQQRRRRIIIMTTTTNNKKSS?KVVVVAAAADDEEGGGG	1	AGG	R	K	366	453331	No	tRNA(CCU) appears to be arginine-type due to A20				0.67
GCA_902387615.1-AGG	40324	B	GCA_902387615.1	Stenotrophomonas maltophilia	FALSE	FFLLSSSSYY**CC*WLLLLPPPPHHQQRRRRIIIMTTTTNNKKSSRRVVVVAAAADDEEGGGG	FFLLSSSSYY??CC?WLLLLPPPPHHQQRRRRIIIMTTTTNNKKSSRKVVVVAAAADDEEGGGG	1	AGG	R	K	466	497218	No	tRNA(CCU) appears to be arginine-type due to A20				0.67
GCA_001411805.1-AGG	41899	B	GCA_001411805.1	Burkholderia plantarii	TRUE	FFLLSSSSYY**CC*WLLLLPPPPHHQQRRRRIIIMTTTTNNKKSSRRVVVVAAAADDEEGGGG	FFLLSSSSYY??CC?WLLLLPPPPHHQQRRRRIIIMTTTTNNKKSSRKVVVVAAAADDEEGGGG	1	AGG	R	K	789	704133	No	tRNA(CCU) appears to be arginine-type due to A20				0.69
GCA_000835205.1-AGG	41899	B	GCA_000835205.1	Burkholderia plantarii	FALSE	FFLLSSSSYY**CC*WLLLLPPPPHHQQRRRRIIIMTTTTNNKKSSRRVVVVAAAADDEEGGGG	FFLLSSSSYY??CC?WLLLLPPPPHHQQRRRRIIIMTTTTNNKKSSRKVVVVAAAADDEEGGGG	1	AGG	R	K	735	687895	No	tRNA(CCU) appears to be arginine-type due to A20				0.69
GCA_001755835.1-AGG	41899	B	GCA_001755835.1	Burkholderia plantarii	FALSE	FFLLSSSSYY**CC*WLLLLPPPPHHQQRRRRIIIMTTTTNNKKSSRRVVVVAAAADDEEGGGG	FFLLSSSSYY??CC?WLLLLPPPPHHQQRRRRIIIMTTTTNNKKSSRKVVVVAAAADDEEGGGG	1	AGG	R	K	713	689803	No	tRNA(CCU) appears to be arginine-type due to A20				0.69
GCA_009914595.1-AGG	41899	B	GCA_009914595.1	Burkholderia plantarii	FALSE	FFLLSSSSYY**CC*WLLLLPPPPHHQQRRRRIIIMTTTTNNKKSSRRVVVVAAAADDEEGGGG	FFLLSSSSYY??CC?WLLLLPPPPHHQQRRRRIIIMTTTTNNKKSSRKVVVVAAAADDEEGGGG	1	AGG	R	K	75	215291	No	tRNA(CCU) appears to be arginine-type due to A20				0.67
GCA_004552085.1-AGG	41978	B	GCA_004552085.1	Ruminococcus sp.	FALSE	FFLLSSSSYY**CC*WLLLLPPPPHHQQRRRRIIIMTTTTNNKKSSRRVVVVAAAADDEEGGGG	FFLLSSSSYY??CC?WLLLLPPPPHHQQRRRRIIIMTTTTNNKKSSRKVVVVAAAADDEEGGGG	1	AGG	R	K	232	209251	No	tRNA(CCU) appears to be arginine-type due to A20				0.6
GCA_003205495.1-AGG	43263	B	GCA_003205495.1	Pseudomonas alcaligenes	FALSE	FFLLSSSSYY**CC*WLLLLPPPPHHQQRRRRIIIMTTTTNNKKSSRRVVVVAAAADDEEGGGG	FFLLSSSSYY??CC?WLLLLPPPPHHQQRRRRIIIMTTTTNNKKSSRKVVVVAAAADDEEGGGG	1	AGG	R	K	526	468149	No	tRNA(CCU) appears to be arginine-type due to A20				0.66
GCA_001552175.1-AGG	46161	B	GCA_001552175.1	Actinomadura kijaniata NBRC 14229	TRUE	FFLLSSSSYY**CC*WLLLLPPPPHHQQRRRRIIIMTTTTNNKKSSRRVVVVAAAADDEEGGGG	FF?LSSSSYY??CC?WLLLLPPPPHHQQRRRRIIIMTTTTNNKKSSRKVVVVAAAADDEEGGGG	1	AGG	R	K	1749	679966	No	tRNA(CCU) appears to be arginine-type due to A20				0.73
GCA_001465445.1-AGG	47660	B	GCA_001465445.1	Pseudomonas sp. ADP	TRUE	FFLLSSSSYY**CC*WLLLLPPPPHHQQRRRRIIIMTTTTNNKKSSRRVVVVAAAADDEEGGGG	FFLLSSSSYY??CC?WLLLLPPPPHHQQRRRRIIIMTTTTNNKKSSRKVVVVAAAADDEEGGGG	1	AGG	R	K	832	729179	No	tRNA(CCU) appears to be arginine-type due to A20				0.67
GCA_900090315.1-AGG	47855	B	GCA_900090315.1	Micromonospora citrea	TRUE	FFLLSSSSYY**CC*WLLLLPPPPHHQQRRRRIIIMTTTTNNKKSSRRVVVVAAAADDEEGGGG	FFLLSSSSYY??CC?WLLLLPPPPHHQQRRRRIIIMTTTTNNKKSSRKVVVVAAAADDEEGGGG	1	AGG	R	K	698	479326	No	tRNA(CCU) appears to be arginine-type due to A20				0.74
GCA_900090245.1-AGG	47864	B	GCA_900090245.1	Micromonospora halophytica	TRUE	FFLLSSSSYY**CC*WLLLLPPPPHHQQRRRRIIIMTTTTNNKKSSRRVVVVAAAADDEEGGGG	FF?LSSSSYY??CC?WLLLLPPPPHHQQRRRRIIIMTTTTNNKKSSRKVVVVAAAADDEEGGGG	1	AGG	R	K	550	457173	No	tRNA(CCU) appears to be arginine-type due to A20				0.73
GCA_004211235.1-AGG	50259	B	GCA_004211235.1	Rubrivivax sp.	FALSE	FFLLSSSSYY**CC*WLLLLPPPPHHQQRRRRIIIMTTTTNNKKSSRRVVVVAAAADDEEGGGG	FFLLSSSSYY??CC?WLLLLPPPPHHQQRRRRIIIMTTTTNNKKSSRKVVVVAAAADDEEGGGG	1	AGG	R	K	847	552918	No	tRNA(CCU) appears to be arginine-type due to A20				0.69
GCA_001654435.1-AGG	53408	B	GCA_001654435.1	Pseudomonas citronellolis	TRUE	FFLLSSSSYY**CC*WLLLLPPPPHHQQRRRRIIIMTTTTNNKKSSRRVVVVAAAADDEEGGGG	FFLLSSSSYY??CC?WLLLLPPPPHHQQRRRRIIIMTTTTNNKKSSRKVVVVAAAADDEEGGGG	1	AGG	R	K	897	759759	No	tRNA(CCU) appears to be arginine-type due to A20				0.67
GCA_001446495.1-AGG	53408	B	GCA_001446495.1	Pseudomonas citronellolis	FALSE	FFLLSSSSYY**CC*WLLLLPPPPHHQQRRRRIIIMTTTTNNKKSSRRVVVVAAAADDEEGGGG	FFLLSSSSYY??CC?WLLLLPPPPHHQQRRRRIIIMTTTTNNKKSSRKVVVVAAAADDEEGGGG	1	AGG	R	K	728	708187	No	tRNA(CCU) appears to be arginine-type due to A20				0.67
GCA_001446995.1-AGG	53408	B	GCA_001446995.1	Pseudomonas citronellolis	FALSE	FFLLSSSSYY**CC*WLLLLPPPPHHQQRRRRIIIMTTTTNNKKSSRRVVVVAAAADDEEGGGG	FFLLSSSSYY??CC?WLLLLPPPPHHQQRRRRIIIMTTTTNNKKSSRKVVVVAAAADDEEGGGG	1	AGG	R	K	726	703663	No	tRNA(CCU) appears to be arginine-type due to A20				0.67
GCA_001586155.1-AGG	53408	B	GCA_001586155.1	Pseudomonas citronellolis	FALSE	FFLLSSSSYY**CC*WLLLLPPPPHHQQRRRRIIIMTTTTNNKKSSRRVVVVAAAADDEEGGGG	FFLLSSSSYY??CC?WLLLLPPPPHHQQRRRRIIIMTTTTNNKKSSRKVVVVAAAADDEEGGGG	1	AGG	R	K	751	731687	No	tRNA(CCU) appears to be arginine-type due to A20				0.67
GCA_002091555.1-AGG	53408	B	GCA_002091555.1	Pseudomonas citronellolis NBRC 103043	FALSE	FFLLSSSSYY**CC*WLLLLPPPPHHQQRRRRIIIMTTTTNNKKSSRRVVVVAAAADDEEGGGG	FFLLSSSSYY??CC?WLLLLPPPPHHQQRRRRIIIMTTTTNNKKSSRKVVVVAAAADDEEGGGG	1	AGG	R	K	729	748506	No	tRNA(CCU) appears to be arginine-type due to A20				0.68
GCA_003402515.1-AGG	53408	B	GCA_003402515.1	Pseudomonas citronellolis	FALSE	FFLLSSSSYY**CC*WLLLLPPPPHHQQRRRRIIIMTTTTNNKKSSRRVVVVAAAADDEEGGGG	FFLLSSSSYY??CC?WLLLLPPPPHHQQRRRRIIIMTTTTNNKKSSRKVVVVAAAADDEEGGGG	1	AGG	R	K	736	737143	No	tRNA(CCU) appears to be arginine-type due to A20				0.67
GCA_004745455.1-AGG	53408	B	GCA_004745455.1	Pseudomonas citronellolis	FALSE	FFLLSSSSYY**CC*WLLLLPPPPHHQQRRRRIIIMTTTTNNKKSSRRVVVVAAAADDEEGGGG	FFLLSSSSYY??CC?WLLLLPPPPHHQQRRRRIIIMTTTTNNKKSSRKVVVVAAAADDEEGGGG	1	AGG	R	K	726	750054	No	tRNA(CCU) appears to be arginine-type due to A20				0.68
GCA_900112375.1-AGG	53408	B	GCA_900112375.1	Pseudomonas citronellolis	FALSE	FFLLSSSSYY**CC*WLLLLPPPPHHQQRRRRIIIMTTTTNNKKSSRRVVVVAAAADDEEGGGG	FFLLSSSSYY??CC?WLLLLPPPPHHQQRRRRIIIMTTTTNNKKSSRKVVVVAAAADDEEGGGG	1	AGG	R	K	724	741541	No	tRNA(CCU) appears to be arginine-type due to A20				0.68
GCA_003217575.1-AGG	54067	B	GCA_003217575.1	Xylophilus ampelinus	TRUE	FFLLSSSSYY**CC*WLLLLPPPPHHQQRRRRIIIMTTTTNNKKSSRRVVVVAAAADDEEGGGG	FFLLSSSSYY??CC?WLLLLPPPPHHQQRRRRIIIMTTTTNNKKSSRKVVVVAAAADDEEGGGG	1	AGG	R	K	505	366126	No	tRNA(CCU) appears to be arginine-type due to A20				0.68
GCA_000972745.1-AGG	56448	B	GCA_000972745.1	Xanthomonas arboricola	TRUE	FFLLSSSSYY**CC*WLLLLPPPPHHQQRRRRIIIMTTTTNNKKSSRRVVVVAAAADDEEGGGG	FFLLSSSSYY??CC?WLLLLPPPPHHQQRRRRIIIMTTTTNNKKSSRKVVVVAAAADDEEGGGG	1	AGG	R	K	454	493673	No	tRNA(CCU) appears to be arginine-type due to A20				0.65
GCA_001306965.1-AGG	56448	B	GCA_001306965.1	Xanthomonas arboricola	FALSE	FFLLSSSSYY**CC*WLLLLPPPPHHQQRRRRIIIMTTTTNNKKSSRRVVVVAAAADDEEGGGG	FFLLSSSSYY??CC?WLLLLPPPPHHQQRRRRIIIMTTTTNNKKSS?KVVVVAAAADDEEGGGG	1	AGG	R	K	367	480370	No	tRNA(CCU) appears to be arginine-type due to A20				0.66
GCA_001675005.1-AGG	56448	B	GCA_001675005.1	Xanthomonas arboricola	FALSE	FFLLSSSSYY**CC*WLLLLPPPPHHQQRRRRIIIMTTTTNNKKSSRRVVVVAAAADDEEGGGG	FFLLSSSSYY??CC?WLLLLPPPPHHQQRRRRIIIMTTTTNNKKSSRKVVVVAAAADDEEGGGG	1	AGG	R	K	410	495911	No	tRNA(CCU) appears to be arginine-type due to A20				0.66
GCA_002939945.1-AGG	56448	B	GCA_002939945.1	Xanthomonas arboricola pv. populi	FALSE	FFLLSSSSYY**CC*WLLLLPPPPHHQQRRRRIIIMTTTTNNKKSSRRVVVVAAAADDEEGGGG	FFLLSSSSYY??CC?WLLLLPPPPHHQQRRRRIIIMTTTTNNKKSSRKVVVVAAAADDEEGGGG	1	AGG	R	K	469	466734	No	tRNA(CCU) appears to be arginine-type due to A20				0.65
GCA_002940125.1-AGG	56448	B	GCA_002940125.1	Xanthomonas arboricola pv. corylina	FALSE	FFLLSSSSYY**CC*WLLLLPPPPHHQQRRRRIIIMTTTTNNKKSSRRVVVVAAAADDEEGGGG	FFLLSSSSYY??CC?WLLLLPPPPHHQQRRRRIIIMTTTTNNKKSSRKVVVVAAAADDEEGGGG	1	AGG	R	K	420	482652	No	tRNA(CCU) appears to be arginine-type due to A20				0.66
GCA_002940145.1-AGG	56448	B	GCA_002940145.1	Xanthomonas arboricola pv. guizotiae	FALSE	FFLLSSSSYY**CC*WLLLLPPPPHHQQRRRRIIIMTTTTNNKKSSRRVVVVAAAADDEEGGGG	FFLLSSSSYY??CC?WLLLLPPPPHHQQRRRRIIIMTTTTNNKKSSRKVVVVAAAADDEEGGGG	1	AGG	R	K	550	474435	No	tRNA(CCU) appears to be arginine-type due to A20				0.66
GCA_002940205.1-AGG	56448	B	GCA_002940205.1	Xanthomonas arboricola pv. guizotiae	FALSE	FFLLSSSSYY**CC*WLLLLPPPPHHQQRRRRIIIMTTTTNNKKSSRRVVVVAAAADDEEGGGG	FFLLSSSSYY??CC?WLLLLPPPPHHQQRRRRIIIMTTTTNNKKSSRKVVVVAAAADDEEGGGG	1	AGG	R	K	559	477658	No	tRNA(CCU) appears to be arginine-type due to A20				0.66
GCA_002940345.1-AGG	56448	B	GCA_002940345.1	Xanthomonas arboricola	FALSE	FFLLSSSSYY**CC*WLLLLPPPPHHQQRRRRIIIMTTTTNNKKSSRRVVVVAAAADDEEGGGG	FFLLSSSSYY??CC?WLLLLPPPPHHQQRRRRIIIMTTTTNNKKSSRKVVVVAAAADDEEGGGG	1	AGG	R	K	385	484869	No	tRNA(CCU) appears to be arginine-type due to A20				0.66
GCA_002940385.1-AGG	56448	B	GCA_002940385.1	Xanthomonas arboricola	FALSE	FFLLSSSSYY**CC*WLLLLPPPPHHQQRRRRIIIMTTTTNNKKSSRRVVVVAAAADDEEGGGG	FFLLSSSSYY??CC?WLLLLPPPPHHQQRRRRIIIMTTTTNNKKSSRKVVVVAAAADDEEGGGG	1	AGG	R	K	451	470909	No	tRNA(CCU) appears to be arginine-type due to A20				0.66
GCA_002940545.1-AGG	56448	B	GCA_002940545.1	Xanthomonas arboricola	FALSE	FFLLSSSSYY**CC*WLLLLPPPPHHQQRRRRIIIMTTTTNNKKSSRRVVVVAAAADDEEGGGG	FFLLSSSSYY??CC?WLLLLPPPPHHQQRRRRIIIMTTTTNNKKSSRKVVVVAAAADDEEGGGG	1	AGG	R	K	389	496716	No	tRNA(CCU) appears to be arginine-type due to A20				0.66
GCA_002940585.1-AGG	56448	B	GCA_002940585.1	Xanthomonas arboricola pv. populi	FALSE	FFLLSSSSYY**CC*WLLLLPPPPHHQQRRRRIIIMTTTTNNKKSSRRVVVVAAAADDEEGGGG	FFLLSSSSYY??CC?WLLLLPPPPHHQQRRRRIIIMTTTTNNKKSSRKVVVVAAAADDEEGGGG	1	AGG	R	K	481	475552	No	tRNA(CCU) appears to be arginine-type due to A20				0.65
GCA_003353015.1-AGG	56448	B	GCA_003353015.1	Xanthomonas arboricola	FALSE	FFLLSSSSYY**CC*WLLLLPPPPHHQQRRRRIIIMTTTTNNKKSSRRVVVVAAAADDEEGGGG	FFLLSSSSYY??CC?WLLLLPPPPHHQQRRRRIIIMTTTTNNKKSS?KVVVVAAAADDEEGGGG	1	AGG	R	K	568	465473	No	tRNA(CCU) appears to be arginine-type due to A20				0.66
GCA_011761585.1-AGG	56448	B	GCA_011761585.1	Xanthomonas arboricola	FALSE	FFLLSSSSYY**CC*WLLLLPPPPHHQQRRRRIIIMTTTTNNKKSSRRVVVVAAAADDEEGGGG	FFLLSSSSYY??CC?WLLLLPPPPHHQQRRRRIIIMTTTTNNKKSS?KVVVVAAAADDEEGGGG	1	AGG	R	K	375	474641	No	tRNA(CCU) appears to be arginine-type due to A20				0.66
GCA_011761715.1-AGG	56448	B	GCA_011761715.1	Xanthomonas arboricola	FALSE	FFLLSSSSYY**CC*WLLLLPPPPHHQQRRRRIIIMTTTTNNKKSSRRVVVVAAAADDEEGGGG	FFLLSSSSYY??CC?WLLLLPPPPHHQQRRRRIIIMTTTTNNKKSSRKVVVVAAAADDEEGGGG	1	AGG	R	K	468	480966	No	tRNA(CCU) appears to be arginine-type due to A20				0.66
GCA_011927585.1-AGG	56448	B	GCA_011927585.1	Xanthomonas arboricola	FALSE	FFLLSSSSYY**CC*WLLLLPPPPHHQQRRRRIIIMTTTTNNKKSSRRVVVVAAAADDEEGGGG	FFLLSSSSYY??CC?WLLLLPPPPHHQQRRRRIIIMTTTTNNKKSSRKVVVVAAAADDEEGGGG	1	AGG	R	K	397	480314	No	tRNA(CCU) appears to be arginine-type due to A20				0.66
GCA_900476395.1-AGG	56448	B	GCA_900476395.1	Xanthomonas arboricola	FALSE	FFLLSSSSYY**CC*WLLLLPPPPHHQQRRRRIIIMTTTTNNKKSSRRVVVVAAAADDEEGGGG	FFLLSSSSYY??CC?WLLLLPPPPHHQQRRRRIIIMTTTTNNKKSSRKVVVVAAAADDEEGGGG	1	AGG	R	K	492	486074	No	tRNA(CCU) appears to be arginine-type due to A20				0.66
GCA_900537265.1-AGG	56448	B	GCA_900537265.1	Xanthomonas arboricola pv. juglandis	FALSE	FFLLSSSSYY**CC*WLLLLPPPPHHQQRRRRIIIMTTTTNNKKSSRRVVVVAAAADDEEGGGG	FFLLSSSSYY??CC?WLLLLPPPPHHQQRRRRIIIMTTTTNNKKSS?KVVVVAAAADDEEGGGG	1	AGG	R	K	518	484919	No	tRNA(CCU) appears to be arginine-type due to A20				0.66
GCA_009769165.1-AGG	56455	B	GCA_009769165.1	Xanthomonas hyacinthi	TRUE	FFLLSSSSYY**CC*WLLLLPPPPHHQQRRRRIIIMTTTTNNKKSSRRVVVVAAAADDEEGGGG	FFLLSSSSYY??CC?WLLLLPPPPHHQQRRRRIIIMTTTTNNKKSSRKVVVVAAAADDEEGGGG	1	AGG	R	K	566	450717	No	tRNA(CCU) appears to be arginine-type due to A20				0.68
GCA_002939895.1-AGG	56455	B	GCA_002939895.1	Xanthomonas hyacinthi	FALSE	FFLLSSSSYY**CC*WLLLLPPPPHHQQRRRRIIIMTTTTNNKKSSRRVVVVAAAADDEEGGGG	FFLLSSSSYY??CC?WLLLLPPPPHHQQRRRRIIIMTTTTNNKKSSRKVVVVAAAADDEEGGGG	1	AGG	R	K	585	460806	No	tRNA(CCU) appears to be arginine-type due to A20				0.68
GCA_002940605.1-AGG	56464	B	GCA_002940605.1	Xanthomonas theicola	TRUE	FFLLSSSSYY**CC*WLLLLPPPPHHQQRRRRIIIMTTTTNNKKSSRRVVVVAAAADDEEGGGG	FFLLSSSSYY??CC?WLLLLPPPPHHQQRRRRIIIMTTTTNNKKSS?KVVVVAAAADDEEGGGG	1	AGG	R	K	553	428161	No	tRNA(CCU) appears to be arginine-type due to A20				0.68
GCA_000620105.1-AGG	57480	B	GCA_000620105.1	Microvirgula aerodenitrificans DSM 15089	TRUE	FFLLSSSSYY**CC*WLLLLPPPPHHQQRRRRIIIMTTTTNNKKSSRRVVVVAAAADDEEGGGG	FFLLSSSSYY??CC?WLLLLPPPPHHQQRRRRIIIMTTTTNNKKSSRKVVVVAAAADDEEGGGG	1	AGG	R	K	643	447591	No	tRNA(CCU) appears to be arginine-type due to A20				0.64
GCA_003051865.1-AGG	57480	B	GCA_003051865.1	Microvirgula aerodenitrificans	FALSE	FFLLSSSSYY**CC*WLLLLPPPPHHQQRRRRIIIMTTTTNNKKSSRRVVVVAAAADDEEGGGG	FFLLSSSSYY??CC?WLLLLPPPPHHQQRRRRIIIMTTTTNNKKSSRKVVVVAAAADDEEGGGG	1	AGG	R	K	659	455285	No	tRNA(CCU) appears to be arginine-type due to A20				0.64
GCA_001485435.1-AGG	57498	B	GCA_001485435.1	Deinococcus grandis	TRUE	FFLLSSSSYY**CC*WLLLLPPPPHHQQRRRRIIIMTTTTNNKKSSRRVVVVAAAADDEEGGGG	FFLLSSSSYY??CC?WLLLLPPPPHHQQRRRRIIIMTTTTNNKKSSRKVVVVAAAADDEEGGGG	1	AGG	R	K	307	326442	No	tRNA(CCU) appears to be arginine-type due to A20				0.7
GCA_009177165.1-AGG	57498	B	GCA_009177165.1	Deinococcus grandis	FALSE	FFLLSSSSYY**CC*WLLLLPPPPHHQQRRRRIIIMTTTTNNKKSSRRVVVVAAAADDEEGGGG	FFLLSSSSYY??CC?WLLLLPPPPHHQQRRRRIIIMTTTTNNKKSSRKVVVVAAAADDEEGGGG	1	AGG	R	K	315	327322	No	tRNA(CCU) appears to be arginine-type due to A20				0.7
GCA_001598255.1-AGG	65048	B	GCA_001598255.1	Mitsuaria chitosanitabida ATCC BAA-476 = NBRC 102408	TRUE	FFLLSSSSYY**CC*WLLLLPPPPHHQQRRRRIIIMTTTTNNKKSSRRVVVVAAAADDEEGGGG	FF?LSSSSYY??CC?WLLLLPPPPHHQQRRRRIIIMTTTTNNKKSSRKVVVVAAAADDEEGGGG	1	AGG	R	K	354	507338	No	tRNA(CCU) appears to be arginine-type due to A20				0.7
GCA_011761945.1-AGG	68569	B	GCA_011761945.1	Sphingomonas leidyi	TRUE	FFLLSSSSYY**CC*WLLLLPPPPHHQQRRRRIIIMTTTTNNKKSSRRVVVVAAAADDEEGGGG	FFLLSSSSYY??CC?WLLLLPPPPHHQQRRRRIIIMTTTTNNKKSSRKVVVVAAAADDEEGGGG	1	AGG	R	K	990	439676	No	tRNA(CCU) appears to be arginine-type due to A20				0.68
GCA_000876015.1-AGG	68895	B	GCA_000876015.1	Cupriavidus basilensis	FALSE	FFLLSSSSYY**CC*WLLLLPPPPHHQQRRRRIIIMTTTTNNKKSSRRVVVVAAAADDEEGGGG	FFLLSSSSYY??CC?WLLLLPPPPHHQQRRRRIIIMTTTTNNKKSSRKVVVVAAAADDEEGGGG	1	AGG	R	K	1257	726931	No	tRNA(CCU) appears to be arginine-type due to A20				0.69
GCA_003504055.1-AGG	69392	B	GCA_003504055.1	Stenotrophomonas sp.	FALSE	FFLLSSSSYY**CC*WLLLLPPPPHHQQRRRRIIIMTTTTNNKKSSRRVVVVAAAADDEEGGGG	FF?LSSSSYY??CC?WLLLLPPPPHHQQRRRRIIIMTTTTNNKKSS?KVVVVAAAADDEEGGGG	1	AGG	R	K	586	331611	No	tRNA(CCU) appears to be arginine-type due to A20				0.69
GCA_003510855.1-AGG	69392	B	GCA_003510855.1	Stenotrophomonas sp.	FALSE	FFLLSSSSYY**CC*WLLLLPPPPHHQQRRRRIIIMTTTTNNKKSSRRVVVVAAAADDEEGGGG	FFLLSSSSYY??CC?WLLLLPPPPHHQQRRRRIIIMTTTTNNKKSS?KVVVVAAAADDEEGGGG	1	AGG	R	K	365	370133	Unclear	tRNA(CCU) does not have A20, has A73 discriminator				0.68
GCA_003541655.1-AGG	69392	B	GCA_003541655.1	Stenotrophomonas sp.	FALSE	FFLLSSSSYY**CC*WLLLLPPPPHHQQRRRRIIIMTTTTNNKKSSRRVVVVAAAADDEEGGGG	FF?LSSSSYY??CC?WLLLLPPPPHHQQRRRRIIIMTTTTNNKKSS?KVVVVAAAADDEEGGGG	1	AGG	R	K	234	312866	No	No tRNA(CCU), Arg-type tRNA(UCU)				0.68
GCA_009360425.1-AGG	69392	B	GCA_009360425.1	Stenotrophomonas sp.	FALSE	FFLLSSSSYY**CC*WLLLLPPPPHHQQRRRRIIIMTTTTNNKKSSRRVVVVAAAADDEEGGGG	FF?LSSSSYY??CC?WLLLLPPPPHHQQRRRRIIIMTTTTNNKKSS?KVVVVAAAADDEEGGGG	1	AGG	R	K	559	381254	No	tRNA(CCU) appears to be arginine-type due to A20				0.69
GCA_009711865.1-AGG	69392	B	GCA_009711865.1	Stenotrophomonas sp.	FALSE	FFLLSSSSYY**CC*WLLLLPPPPHHQQRRRRIIIMTTTTNNKKSSRRVVVVAAAADDEEGGGG	FFLLSSSSYY??CC?WLLLLPPPPHHQQRRRRIIIMTTTTNNKKSSRKVVVVAAAADDEEGGGG	1	AGG	R	K	564	396003	No	tRNA(CCU) appears to be arginine-type due to A20				0.69
GCA_009363155.1-AGG	69964	B	GCA_009363155.1	Azotobacter salinestris	TRUE	FFLLSSSSYY**CC*WLLLLPPPPHHQQRRRRIIIMTTTTNNKKSSRRVVVVAAAADDEEGGGG	FFLLSSSSYY??CC?WLLLLPPPPHHQQRRRRIIIMTTTTNNKKSS?KVVVVAAAADDEEGGGG	1	AGG	R	K	1381	542066	No	tRNA(CCU) appears to be arginine-type due to A20				0.66
GCA_004322525.1-AGG	72226	B	GCA_004322525.1	Lysobacter sp.	TRUE	FFLLSSSSYY**CC*WLLLLPPPPHHQQRRRRIIIMTTTTNNKKSSRRVVVVAAAADDEEGGGG	FFLLSSSSYY??CC?WLLLLPPPPHHQQRRRRIIIMTTTTNNKKSSKKVVVVAAAADDEEGGGG	2	AGG	R	K	505	303730	No	tRNA(CCU) appears to be arginine-type due to A20				0.67
GCA_011526085.1-AGG	72226	B	GCA_011526085.1	Lysobacter sp.	FALSE	FFLLSSSSYY**CC*WLLLLPPPPHHQQRRRRIIIMTTTTNNKKSSRRVVVVAAAADDEEGGGG	FF?LSSSSYY??CC?WLLLLPPPPHHQQRRRRIIIMTTTTNNKKSSRKVVVVAAAADDEEGGGG	1	AGG	R	K	410	368535	No	tRNA(CCU) appears to be arginine-type due to A20				0.68
GCA_002082135.1-AGG	72557	B	GCA_002082135.1	Achromobacter ruhlandii	TRUE	FFLLSSSSYY**CC*WLLLLPPPPHHQQRRRRIIIMTTTTNNKKSSRRVVVVAAAADDEEGGGG	FFLLSSSSYY??CC?WLLLLPPPPHHQQRRRRIIIMTTTTNNKKSSRKVVVVAAAADDEEGGGG	1	AGG	R	K	449	605213	No	tRNA(CCU) appears to be arginine-type due to A20				0.68
GCA_004799035.1-AGG	75310	B	GCA_004799035.1	Rhodanobacter lindaniclasticus	TRUE	FFLLSSSSYY**CC*WLLLLPPPPHHQQRRRRIIIMTTTTNNKKSSRRVVVVAAAADDEEGGGG	FFLLSSSSYY??CC?WLLLLPPPPHHQQRRRRIIIMTTTTNNKKSSRKVVVVAAAADDEEGGGG	1	AGG	R	K	428	404398	No	tRNA(CCU) appears to be arginine-type due to A20				0.68
GCA_008801975.1-AGG	75697	B	GCA_008801975.1	Castellaniella defragrans	FALSE	FFLLSSSSYY**CC*WLLLLPPPPHHQQRRRRIIIMTTTTNNKKSSRRVVVVAAAADDEEGGGG	FFLLSSSSYY??CC?WLLLLPPPPHHQQRRRRIIIMTTTTNNKKSSRKVVVVAAAADDEEGGGG	1	AGG	R	K	518	481595	No	tRNA(CCU) appears to be arginine-type due to A20				0.69
GCA_900547945.1-AGG	77133	B	GCA_900547945.1	uncultured bacterium	FALSE	FFLLSSSSYY**CC*WLLLLPPPPHHQQRRRRIIIMTTTTNNKKSSRRVVVVAAAADDEEGGGG	FFLLSSSSYY??CC?WLLLLPPPPHHQQRRRRIIIMTTTTNNKKSSRKVVVVAAAADDEEGGGG	1	AGG	R	K	487	222868	No	tRNA(CCU) appears to be arginine-type due to A20				0.67
GCA_900549045.1-AGG	77133	B	GCA_900549045.1	uncultured bacterium	FALSE	FFLLSSSSYY**CC*WLLLLPPPPHHQQRRRRIIIMTTTTNNKKSSRRVVVVAAAADDEEGGGG	FFLLSSSSYY??CC?WLLLLPPPPHHQQRRRRIIIMTTTTNNKKSSRKVVVVAAAADDEEGGGG	1	AGG	R	K	274	241213	No	No tRNA(CCU), Arg-type tRNA(UCU)				0.57
GCA_900550215.1-AGG	77133	B	GCA_900550215.1	uncultured bacterium	FALSE	FFLLSSSSYY**CC*WLLLLPPPPHHQQRRRRIIIMTTTTNNKKSSRRVVVVAAAADDEEGGGG	FFLLSSSSYY??CC?WLLLLPPPPHHQQRRRRIIIMTTTTNNKKSS?KVVVVAAAADDEEGGGG	1	AGG	R	K	696	319946	No	tRNA(CCU) appears to be arginine-type due to A20				0.6
GCA_900550405.1-AGG	77133	B	GCA_900550405.1	uncultured bacterium	FALSE	FFLLSSSSYY**CC*WLLLLPPPPHHQQRRRRIIIMTTTTNNKKSSRRVVVVAAAADDEEGGGG	FFLLSSSSYY??CC?WLLLLPPPPHHQQRRRRIIIMTTTTNNKKSSRKVVVVAAAADDEEGGGG	1	AGG	R	K	900	324115	No	tRNA(CCU) appears to be arginine-type due to A20				0.61
GCA_902761575.1-AGG	77133	B	GCA_902761575.1	uncultured bacterium	FALSE	FFLLSSSSYY**CC*WLLLLPPPPHHQQRRRRIIIMTTTTNNKKSSRRVVVVAAAADDEEGGGG	FF?LSSSSYY??CC?WLLLLPPPPHHQQRRRRIIIMTTTTNNKKSS?KVVVVAAAADDEEGGGG	1	AGG	R	K	479	214810	No	tRNA(CCU) appears to be arginine-type due to A20				0.7
GCA_902764755.1-AGG	77133	B	GCA_902764755.1	uncultured bacterium	FALSE	FFLLSSSSYY**CC*WLLLLPPPPHHQQRRRRIIIMTTTTNNKKSSRRVVVVAAAADDEEGGGG	FF?LSSSSYY??CC?WLLLLPPPPHHQQRRRRIIIMTTTTNNKKSSRKVVVVAAAADDEEGGGG	1	AGG	R	K	476	204277	No	tRNA(CCU) appears to be arginine-type due to A20				0.7
GCA_902778745.1-AGG	77133	B	GCA_902778745.1	uncultured bacterium	FALSE	FFLLSSSSYY**CC*WLLLLPPPPHHQQRRRRIIIMTTTTNNKKSSRRVVVVAAAADDEEGGGG	FFLLSSSSYY??CC?WLLLLPPPPHHQQRRRRIIIMTTTTNNKKSSRKVVVVAAAADDEEGGGG	1	AGG	R	K	524	223979	No	tRNA(CCU) appears to be arginine-type due to A20				0.7
GCA_902793555.1-AGG	77133	B	GCA_902793555.1	uncultured bacterium	FALSE	FFLLSSSSYY**CC*WLLLLPPPPHHQQRRRRIIIMTTTTNNKKSSRRVVVVAAAADDEEGGGG	FF?LSSSSYY??CC?WLLLLPPPPHHQQRRRRIIIMTTTTNNKKSSRKVVVVAAAADDEEGGGG	1	AGG	R	K	220	208527	No	tRNA(CCU) appears to be arginine-type due to A20				0.7
GCA_012396115.1-AGG	78355	B	GCA_012396115.1	Streptomyces somaliensis DSM 40738	FALSE	FFLLSSSSYY**CC*WLLLLPPPPHHQQRRRRIIIMTTTTNNKKSSRRVVVVAAAADDEEGGGG	FF?LSSSSYY??CC?WLLLLPPPPHHQQRRRRIIIMTTTTNNKKSSRKVVVVAAAADDEEGGGG	1	AGG	R	K	1863	424905	No	tRNA(CCU) appears to be arginine-type due to A20				0.74
GCA_002346955.1-AGG	80866	B	GCA_002346955.1	Delftia acidovorans	FALSE	FFLLSSSSYY**CC*WLLLLPPPPHHQQRRRRIIIMTTTTNNKKSSRRVVVVAAAADDEEGGGG	FFLLSSSSYY??CC?WLLLLPPPPHHQQRRRRIIIMTTTTNNKKSSRKVVVVAAAADDEEGGGG	1	AGG	R	K	1089	600031	No	tRNA(CCU) appears to be arginine-type due to A20				0.66
GCA_000176855.2-AGG	80867	B	GCA_000176855.2	Acidovorax avenae subsp. avenae ATCC 19860	TRUE	FFLLSSSSYY**CC*WLLLLPPPPHHQQRRRRIIIMTTTTNNKKSSRRVVVVAAAADDEEGGGG	FFLLSSSSYY??CC?WLLLLPPPPHHQQRRRRIIIMTTTTNNKKSSRKVVVVAAAADDEEGGGG	1	AGG	R	K	631	513844	No	tRNA(CCU) appears to be arginine-type due to A20				0.69
GCA_001282395.1-AGG	80867	B	GCA_001282395.1	Acidovorax avenae	FALSE	FFLLSSSSYY**CC*WLLLLPPPPHHQQRRRRIIIMTTTTNNKKSSRRVVVVAAAADDEEGGGG	FFLLSSSSYY??CC?WLLLLPPPPHHQQRRRRIIIMTTTTNNKKSSRKVVVVAAAADDEEGGGG	1	AGG	R	K	683	542657	No	tRNA(CCU) appears to be arginine-type due to A20				0.69
GCA_003029685.1-AGG	80867	B	GCA_003029685.1	Acidovorax avenae subsp. avenae	FALSE	FFLLSSSSYY**CC*WLLLLPPPPHHQQRRRRIIIMTTTTNNKKSSRRVVVVAAAADDEEGGGG	FFLLSSSSYY??CC?WLLLLPPPPHHQQRRRRIIIMTTTTNNKKSSRKVVVVAAAADDEEGGGG	1	AGG	R	K	627	516498	No	tRNA(CCU) appears to be arginine-type due to A20				0.69
GCA_003029705.1-AGG	80867	B	GCA_003029705.1	Acidovorax avenae subsp. avenae	FALSE	FFLLSSSSYY**CC*WLLLLPPPPHHQQRRRRIIIMTTTTNNKKSSRRVVVVAAAADDEEGGGG	FFLLSSSSYY??CC?WLLLLPPPPHHQQRRRRIIIMTTTTNNKKSSRKVVVVAAAADDEEGGGG	1	AGG	R	K	422	336865	No	tRNA(CCU) appears to be arginine-type due to A20				0.69
GCA_003029725.1-AGG	80867	B	GCA_003029725.1	Acidovorax avenae subsp. avenae	FALSE	FFLLSSSSYY**CC*WLLLLPPPPHHQQRRRRIIIMTTTTNNKKSSRRVVVVAAAADDEEGGGG	FFLLSSSSYY??CC?WLLLLPPPPHHQQRRRRIIIMTTTTNNKKSSRKVVVVAAAADDEEGGGG	1	AGG	R	K	629	498782	No	tRNA(CCU) appears to be arginine-type due to A20				0.68
GCA_003029765.1-AGG	80867	B	GCA_003029765.1	Acidovorax avenae subsp. avenae	FALSE	FFLLSSSSYY**CC*WLLLLPPPPHHQQRRRRIIIMTTTTNNKKSSRRVVVVAAAADDEEGGGG	FFLLSSSSYY??CC?WLLLLPPPPHHQQRRRRIIIMTTTTNNKKSSRKVVVVAAAADDEEGGGG	1	AGG	R	K	461	398557	No	tRNA(CCU) appears to be arginine-type due to A20				0.69
GCA_003029785.1-AGG	80867	B	GCA_003029785.1	Acidovorax avenae subsp. avenae	FALSE	FFLLSSSSYY**CC*WLLLLPPPPHHQQRRRRIIIMTTTTNNKKSSRRVVVVAAAADDEEGGGG	FFLLSSSSYY??CC?WLLLLPPPPHHQQRRRRIIIMTTTTNNKKSSRKVVVVAAAADDEEGGGG	1	AGG	R	K	517	455288	No	tRNA(CCU) appears to be arginine-type due to A20				0.69
GCA_003029805.1-AGG	80867	B	GCA_003029805.1	Acidovorax avenae subsp. avenae	FALSE	FFLLSSSSYY**CC*WLLLLPPPPHHQQRRRRIIIMTTTTNNKKSSRRVVVVAAAADDEEGGGG	FFLLSSSSYY??CC?WLLLLPPPPHHQQRRRRIIIMTTTTNNKKSSRKVVVVAAAADDEEGGGG	1	AGG	R	K	565	444339	No	No tRNA(CCU), Arg-type tRNA(UCU)				0.69
GCA_003029825.1-AGG	80867	B	GCA_003029825.1	Acidovorax avenae subsp. avenae	FALSE	FFLLSSSSYY**CC*WLLLLPPPPHHQQRRRRIIIMTTTTNNKKSSRRVVVVAAAADDEEGGGG	FFLLSSSSYY??CC?WLLLLPPPPHHQQRRRRIIIMTTTTNNKKSSRKVVVVAAAADDEEGGGG	1	AGG	R	K	501	424341	No	tRNA(CCU) appears to be arginine-type due to A20				0.69
GCA_003029865.1-AGG	80867	B	GCA_003029865.1	Acidovorax avenae subsp. avenae	FALSE	FFLLSSSSYY**CC*WLLLLPPPPHHQQRRRRIIIMTTTTNNKKSSRRVVVVAAAADDEEGGGG	FFLLSSSSYY??CC?WLLLLPPPPHHQQRRRRIIIMTTTTNNKKSSRKVVVVAAAADDEEGGGG	1	AGG	R	K	499	413148	No	No tRNA(CCU), Arg-type tRNA(UCU)				0.69
GCA_003029885.1-AGG	80867	B	GCA_003029885.1	Acidovorax avenae subsp. avenae	FALSE	FFLLSSSSYY**CC*WLLLLPPPPHHQQRRRRIIIMTTTTNNKKSSRRVVVVAAAADDEEGGGG	FFLLSSSSYY??CC?WLLLLPPPPHHQQRRRRIIIMTTTTNNKKSSRKVVVVAAAADDEEGGGG	1	AGG	R	K	451	379970	No	tRNA(CCU) appears to be arginine-type due to A20				0.69
GCA_003029905.1-AGG	80867	B	GCA_003029905.1	Acidovorax avenae subsp. avenae	FALSE	FFLLSSSSYY**CC*WLLLLPPPPHHQQRRRRIIIMTTTTNNKKSSRRVVVVAAAADDEEGGGG	FFLLSSSSYY??CC?WLLLLPPPPHHQQRRRRIIIMTTTTNNKKSSRKVVVVAAAADDEEGGGG	1	AGG	R	K	541	420942	No	No tRNA(CCU), Arg-type tRNA(UCU)				0.69
GCA_003029925.1-AGG	80867	B	GCA_003029925.1	Acidovorax avenae subsp. avenae	FALSE	FFLLSSSSYY**CC*WLLLLPPPPHHQQRRRRIIIMTTTTNNKKSSRRVVVVAAAADDEEGGGG	FFLLSSSSYY??CC?WLLLLPPPPHHQQRRRRIIIMTTTTNNKKSSRKVVVVAAAADDEEGGGG	1	AGG	R	K	368	296472	No	tRNA(CCU) appears to be arginine-type due to A20				0.69
GCA_003029945.1-AGG	80867	B	GCA_003029945.1	Acidovorax avenae subsp. avenae	FALSE	FFLLSSSSYY**CC*WLLLLPPPPHHQQRRRRIIIMTTTTNNKKSSRRVVVVAAAADDEEGGGG	FFLLSSSSYY??CC?WLLLLPPPPHHQQRRRRIIIMTTTTNNKKSSRKVVVVAAAADDEEGGGG	1	AGG	R	K	491	403949	No	tRNA(CCU) appears to be arginine-type due to A20				0.69
GCA_003029965.1-AGG	80867	B	GCA_003029965.1	Acidovorax avenae subsp. avenae	FALSE	FFLLSSSSYY**CC*WLLLLPPPPHHQQRRRRIIIMTTTTNNKKSSRRVVVVAAAADDEEGGGG	FFLLSSSSYY??CC?WLLLLPPPPHHQQRRRRIIIMTTTTNNKKSSRKVVVVAAAADDEEGGGG	1	AGG	R	K	486	396898	No	No tRNA(CCU), Arg-type tRNA(UCU)				0.69
GCA_003029985.1-AGG	80867	B	GCA_003029985.1	Acidovorax avenae subsp. avenae	FALSE	FFLLSSSSYY**CC*WLLLLPPPPHHQQRRRRIIIMTTTTNNKKSSRRVVVVAAAADDEEGGGG	FFLLSSSSYY??CC?WLLLLPPPPHHQQRRRRIIIMTTTTNNKKSSRKVVVVAAAADDEEGGGG	1	AGG	R	K	471	365842	No	No tRNA(CCU), Arg-type tRNA(UCU)				0.69
GCA_003030005.1-AGG	80867	B	GCA_003030005.1	Acidovorax avenae subsp. avenae	FALSE	FFLLSSSSYY**CC*WLLLLPPPPHHQQRRRRIIIMTTTTNNKKSSRRVVVVAAAADDEEGGGG	FFLLSSSSYY??CC?WLLLLPPPPHHQQRRRRIIIMTTTTNNKKSSRKVVVVAAAADDEEGGGG	1	AGG	R	K	503	423826	No	tRNA(CCU) appears to be arginine-type due to A20				0.69
GCA_900104515.1-AGG	80868	B	GCA_900104515.1	Acidovorax cattleyae	TRUE	FFLLSSSSYY**CC*WLLLLPPPPHHQQRRRRIIIMTTTTNNKKSSRRVVVVAAAADDEEGGGG	FFLLSSSSYY??CC?WLLLLPPPPHHQQRRRRIIIMTTTTNNKKSSRKVVVVAAAADDEEGGGG	1	AGG	R	K	876	522216	No	tRNA(CCU) appears to be arginine-type due to A20				0.69
GCA_003029845.1-AGG	80868	B	GCA_003029845.1	Acidovorax cattleyae	FALSE	FFLLSSSSYY**CC*WLLLLPPPPHHQQRRRRIIIMTTTTNNKKSSRRVVVVAAAADDEEGGGG	FFLLSSSSYY??CC?WLLLLPPPPHHQQRRRRIIIMTTTTNNKKSSRKVVVVAAAADDEEGGGG	1	AGG	R	K	719	448002	No	tRNA(CCU) appears to be arginine-type due to A20				0.69
GCA_000015325.1-AGG	80869	B	GCA_000015325.1	Acidovorax citrulli AAC00-1	TRUE	FFLLSSSSYY**CC*WLLLLPPPPHHQQRRRRIIIMTTTTNNKKSSRRVVVVAAAADDEEGGGG	FFLLSSSSYY??CC?WLLLLPPPPHHQQRRRRIIIMTTTTNNKKSSRKVVVVAAAADDEEGGGG	1	AGG	R	K	744	473441	No	tRNA(CCU) appears to be arginine-type due to A20				0.69
GCA_000948135.1-AGG	80869	B	GCA_000948135.1	Acidovorax citrulli	FALSE	FFLLSSSSYY**CC*WLLLLPPPPHHQQRRRRIIIMTTTTNNKKSSRRVVVVAAAADDEEGGGG	FFLLSSSSYY??CC?WLLLLPPPPHHQQRRRRIIIMTTTTNNKKSSRKVVVVAAAADDEEGGGG	1	AGG	R	K	721	465851	No	tRNA(CCU) appears to be arginine-type due to A20				0.69
GCA_000968215.1-AGG	80869	B	GCA_000968215.1	Acidovorax citrulli	FALSE	FFLLSSSSYY**CC*WLLLLPPPPHHQQRRRRIIIMTTTTNNKKSSRRVVVVAAAADDEEGGGG	FFLLSSSSYY??CC?WLLLLPPPPHHQQRRRRIIIMTTTTNNKKSSRKVVVVAAAADDEEGGGG	1	AGG	R	K	729	462606	No	tRNA(CCU) appears to be arginine-type due to A20				0.69
GCA_001593665.2-AGG	80869	B	GCA_001593665.2	Acidovorax citrulli	FALSE	FFLLSSSSYY**CC*WLLLLPPPPHHQQRRRRIIIMTTTTNNKKSSRRVVVVAAAADDEEGGGG	FFLLSSSSYY??CC?WLLLLPPPPHHQQRRRRIIIMTTTTNNKKSSRKVVVVAAAADDEEGGGG	1	AGG	R	K	723	464220	No	tRNA(CCU) appears to be arginine-type due to A20				0.69
GCA_002441975.1-AGG	80869	B	GCA_002441975.1	Acidovorax citrulli	FALSE	FFLLSSSSYY**CC*WLLLLPPPPHHQQRRRRIIIMTTTTNNKKSSRRVVVVAAAADDEEGGGG	FFLLSSSSYY??CC?WLLLLPPPPHHQQRRRRIIIMTTTTNNKKSSRKVVVVAAAADDEEGGGG	1	AGG	R	K	743	472781	No	tRNA(CCU) appears to be arginine-type due to A20				0.69
GCA_003096435.1-AGG	80869	B	GCA_003096435.1	Acidovorax citrulli	FALSE	FFLLSSSSYY**CC*WLLLLPPPPHHQQRRRRIIIMTTTTNNKKSSRRVVVVAAAADDEEGGGG	FFLLSSSSYY??CC?WLLLLPPPPHHQQRRRRIIIMTTTTNNKKSSRKVVVVAAAADDEEGGGG	1	AGG	R	K	742	471287	No	tRNA(CCU) appears to be arginine-type due to A20				0.69
GCA_003387255.1-AGG	80869	B	GCA_003387255.1	Acidovorax citrulli	FALSE	FFLLSSSSYY**CC*WLLLLPPPPHHQQRRRRIIIMTTTTNNKKSSRRVVVVAAAADDEEGGGG	FFLLSSSSYY??CC?WLLLLPPPPHHQQRRRRIIIMTTTTNNKKSSRKVVVVAAAADDEEGGGG	1	AGG	R	K	736	470881	No	tRNA(CCU) appears to be arginine-type due to A20				0.69
GCA_003664145.1-AGG	80869	B	GCA_003664145.1	Acidovorax citrulli	FALSE	FFLLSSSSYY**CC*WLLLLPPPPHHQQRRRRIIIMTTTTNNKKSSRRVVVVAAAADDEEGGGG	FFLLSSSSYY??CC?WLLLLPPPPHHQQRRRRIIIMTTTTNNKKSSRKVVVVAAAADDEEGGGG	1	AGG	R	K	737	469562	No	tRNA(CCU) appears to be arginine-type due to A20				0.69
GCA_009758115.1-AGG	80869	B	GCA_009758115.1	Acidovorax citrulli	FALSE	FFLLSSSSYY**CC*WLLLLPPPPHHQQRRRRIIIMTTTTNNKKSSRRVVVVAAAADDEEGGGG	FFLLSSSSYY??CC?WLLLLPPPPHHQQRRRRIIIMTTTTNNKKSSRKVVVVAAAADDEEGGGG	1	AGG	R	K	672	433597	No	tRNA(CCU) appears to be arginine-type due to A20				0.68
GCA_009758155.1-AGG	80869	B	GCA_009758155.1	Acidovorax citrulli	FALSE	FFLLSSSSYY**CC*WLLLLPPPPHHQQRRRRIIIMTTTTNNKKSSRRVVVVAAAADDEEGGGG	FFLLSSSSYY??CC?WLLLLPPPPHHQQRRRRIIIMTTTTNNKKSSRKVVVVAAAADDEEGGGG	1	AGG	R	K	674	446726	No	tRNA(CCU) appears to be arginine-type due to A20				0.68
GCA_900100305.1-AGG	80869	B	GCA_900100305.1	Acidovorax citrulli	FALSE	FFLLSSSSYY**CC*WLLLLPPPPHHQQRRRRIIIMTTTTNNKKSSRRVVVVAAAADDEEGGGG	FFLLSSSSYY??CC?WLLLLPPPPHHQQRRRRIIIMTTTTNNKKSSRKVVVVAAAADDEEGGGG	1	AGG	R	K	711	476603	No	tRNA(CCU) appears to be arginine-type due to A20				0.69
GCA_003722135.1-AGG	82367	B	GCA_003722135.1	Paracoccus pantotrophus	FALSE	FFLLSSSSYY**CC*WLLLLPPPPHHQQRRRRIIIMTTTTNNKKSSRRVVVVAAAADDEEGGGG	FFLLSSSSYY??CC?WLLLLPPPPHHQQRRRRIIIMTTTTNNKKSSRKVVVVAAAADDEEGGGG	1	AGG	R	K	840	443729	No	tRNA(CCU) appears to be arginine-type due to A20				0.68
GCA_008354965.1-AGG	82541	B	GCA_008354965.1	Cupriavidus gilardii	FALSE	FFLLSSSSYY**CC*WLLLLPPPPHHQQRRRRIIIMTTTTNNKKSSRRVVVVAAAADDEEGGGG	FFLLSSSSYY??CC?WLLLLPPPPHHQQRRRRIIIMTTTTNNKKSSRKVVVVAAAADDEEGGGG	1	AGG	R	K	576	545330	No	tRNA(CCU) appears to be arginine-type due to A20				0.68
GCA_000422305.1-AGG	83615	B	GCA_000422305.1	Luteimonas mephitis DSM 12574	TRUE	FFLLSSSSYY**CC*WLLLLPPPPHHQQRRRRIIIMTTTTNNKKSSRRVVVVAAAADDEEGGGG	FF?LSSSSYY??CC?WLLLLPPPPHHQQRRRRII?MTTTTNNKKSSRKVVVVAAAADDEEGGGG	1	AGG	R	K	641	335532	No	tRNA(CCU) appears to be arginine-type due to A20				0.68
GCA_001431425.1-AGG	83617	B	GCA_001431425.1	Stenotrophomonas nitritireducens	FALSE	FFLLSSSSYY**CC*WLLLLPPPPHHQQRRRRIIIMTTTTNNKKSSRRVVVVAAAADDEEGGGG	FFLLSSSSYY??CC?WLLLLPPPPHHQQRRRRIIIMTTTTNNKKSSRKVVVVAAAADDEEGGGG	1	AGG	R	K	619	401926	No	tRNA(CCU) appears to be arginine-type due to A20				0.68
GCA_010093165.1-AGG	83619	B	GCA_010093165.1	Pseudoxanthomonas broegbernensis	TRUE	FFLLSSSSYY**CC*WLLLLPPPPHHQQRRRRIIIMTTTTNNKKSSRRVVVVAAAADDEEGGGG	FF?LSSSSYY??CC?WLLLLPPPPHHQQRRRRIIIMTTTTNNKKSSRKVVVVAAAADDEEGGGG	1	AGG	R	K	553	346258	No	tRNA(CCU) appears to be arginine-type due to A20				0.71
GCA_001051055.1-AGG	85698	B	GCA_001051055.1	Achromobacter xylosoxidans	FALSE	FFLLSSSSYY**CC*WLLLLPPPPHHQQRRRRIIIMTTTTNNKKSSRRVVVVAAAADDEEGGGG	FFLLSSSSYY??CC?WLLLLPPPPHHQQRRRRIIIMTTTTNNKKSSRKVVVVAAAADDEEGGGG	1	AGG	R	K	415	577938	No	tRNA(CCU) appears to be arginine-type due to A20				0.68
GCA_001298915.1-AGG	85698	B	GCA_001298915.1	Achromobacter xylosoxidans	FALSE	FFLLSSSSYY**CC*WLLLLPPPPHHQQRRRRIIIMTTTTNNKKSSRRVVVVAAAADDEEGGGG	FFLLSSSSYY??CC?WLLLLPPPPHHQQRRRRIIIMTTTTNNKKSSRKVVVVAAAADDEEGGGG	1	AGG	R	K	541	647021	No	tRNA(CCU) appears to be arginine-type due to A20				0.68
GCA_001299015.1-AGG	85698	B	GCA_001299015.1	Achromobacter xylosoxidans	FALSE	FFLLSSSSYY**CC*WLLLLPPPPHHQQRRRRIIIMTTTTNNKKSSRRVVVVAAAADDEEGGGG	FFLLSSSSYY??CC?WLLLLPPPPHHQQRRRRIIIMTTTTNNKKSSRKVVVVAAAADDEEGGGG	1	AGG	R	K	575	646710	No	tRNA(CCU) appears to be arginine-type due to A20				0.68
GCA_001299155.1-AGG	85698	B	GCA_001299155.1	Achromobacter xylosoxidans	FALSE	FFLLSSSSYY**CC*WLLLLPPPPHHQQRRRRIIIMTTTTNNKKSSRRVVVVAAAADDEEGGGG	FFLLSSSSYY??CC?WLLLLPPPPHHQQRRRRIIIMTTTTNNKKSSRKVVVVAAAADDEEGGGG	1	AGG	R	K	560	654659	No	tRNA(CCU) appears to be arginine-type due to A20				0.68
GCA_001299215.1-AGG	85698	B	GCA_001299215.1	Achromobacter xylosoxidans	FALSE	FFLLSSSSYY**CC*WLLLLPPPPHHQQRRRRIIIMTTTTNNKKSSRRVVVVAAAADDEEGGGG	FFLLSSSSYY??CC?WLLLLPPPPHHQQRRRRIIIMTTTTNNKKSSRKVVVVAAAADDEEGGGG	1	AGG	R	K	570	651441	No	tRNA(CCU) appears to be arginine-type due to A20				0.68
GCA_008432465.1-AGG	85698	B	GCA_008432465.1	Achromobacter xylosoxidans	FALSE	FFLLSSSSYY**CC*WLLLLPPPPHHQQRRRRIIIMTTTTNNKKSSRRVVVVAAAADDEEGGGG	FFLLSSSSYY??CC?WLLLLPPPPHHQQRRRRIIIMTTTTNNKKSSRKVVVVAAAADDEEGGGG	1	AGG	R	K	577	677855	No	tRNA(CCU) appears to be arginine-type due to A20				0.68
GCA_902825845.1-AGG	86027	B	GCA_902825845.1	uncultured beta proteobacterium	TRUE	FFLLSSSSYY**CC*WLLLLPPPPHHQQRRRRIIIMTTTTNNKKSSRRVVVVAAAADDEEGGGG	FFLLSSSSYY??CC?WLLLLPPPPHHQQRRRRIIIMTTTTNNKKSSRKVVVVAAAADDEEGGGG	1	AGG	R	K	1196	674607	No	tRNA(CCU) appears to be arginine-type due to A20				0.62
GCA_001431585.1-AGG	86184	B	GCA_001431585.1	Stenotrophomonas pictorum JCM 9942	TRUE	FFLLSSSSYY**CC*WLLLLPPPPHHQQRRRRIIIMTTTTNNKKSSRRVVVVAAAADDEEGGGG	FFLLSSSSYY??CC?WLLLLPPPPHHQQRRRRIIIMTTTTNNKKSSRKVVVVAAAADDEEGGGG	1	AGG	R	K	407	388887	No	tRNA(CCU) appears to be arginine-type due to A20				0.66
GCA_001310775.1-AGG	86184	B	GCA_001310775.1	Stenotrophomonas pictorum JCM 9942	FALSE	FFLLSSSSYY**CC*WLLLLPPPPHHQQRRRRIIIMTTTTNNKKSSRRVVVVAAAADDEEGGGG	FFLLSSSSYY??CC?WLLLLPPPPHHQQRRRRIIIMTTTTNNKKSSRKVVVVAAAADDEEGGGG	1	AGG	R	K	429	398676	No	tRNA(CCU) appears to be arginine-type due to A20				0.66
GCA_003812965.1-AGG	87883	B	GCA_003812965.1	Burkholderia multivorans	FALSE	FFLLSSSSYY**CC*WLLLLPPPPHHQQRRRRIIIMTTTTNNKKSSRRVVVVAAAADDEEGGGG	FFLLSSSSYY??CC?WLLLLPPPPHHQQRRRRIIIMTTTTNNKKSSRKVVVVAAAADDEEGGGG	1	AGG	R	K	681	723418	No	tRNA(CCU) appears to be arginine-type due to A20				0.67
GCA_000300975.2-AGG	92645	B	GCA_000300975.2	Herbaspirillum frisingense GSF30	TRUE	FFLLSSSSYY**CC*WLLLLPPPPHHQQRRRRIIIMTTTTNNKKSSRRVVVVAAAADDEEGGGG	FFLLSSSSYY??CC?WLLLLPPPPHHQQRRRRIIIMTTTTNNKKSSRKVVVVAAAADDEEGGGG	1	AGG	R	K	619	613278	No	tRNA(CCU) appears to be arginine-type due to A20				0.63
GCA_000767615.3-AGG	93220	B	GCA_000767615.3	Pandoraea pnomenusa	TRUE	FFLLSSSSYY**CC*WLLLLPPPPHHQQRRRRIIIMTTTTNNKKSSRRVVVVAAAADDEEGGGG	FFLLSSSSYY??CC?WLLLLPPPPHHQQRRRRIIIMTTTTNNKKSSRKVVVVAAAADDEEGGGG	1	AGG	R	K	619	564030	No	tRNA(CCU) appears to be arginine-type due to A20				0.65
GCA_000504585.2-AGG	93220	B	GCA_000504585.2	Pandoraea pnomenusa	FALSE	FFLLSSSSYY**CC*WLLLLPPPPHHQQRRRRIIIMTTTTNNKKSSRRVVVVAAAADDEEGGGG	FFLLSSSSYY??CC?WLLLLPPPPHHQQRRRRIIIMTTTTNNKKSSRKVVVVAAAADDEEGGGG	1	AGG	R	K	657	571248	No	tRNA(CCU) appears to be arginine-type due to A20				0.65
GCA_000523065.1-AGG	93220	B	GCA_000523065.1	Pandoraea pnomenusa	FALSE	FFLLSSSSYY**CC*WLLLLPPPPHHQQRRRRIIIMTTTTNNKKSSRRVVVVAAAADDEEGGGG	FFLLSSSSYY??CC?WLLLLPPPPHHQQRRRRIIIMTTTTNNKKSSRKVVVVAAAADDEEGGGG	1	AGG	R	K	682	583330	No	tRNA(CCU) appears to be arginine-type due to A20				0.65
GCA_000604065.3-AGG	93220	B	GCA_000604065.3	Pandoraea pnomenusa	FALSE	FFLLSSSSYY**CC*WLLLLPPPPHHQQRRRRIIIMTTTTNNKKSSRRVVVVAAAADDEEGGGG	FFLLSSSSYY??CC?WLLLLPPPPHHQQRRRRIIIMTTTTNNKKSSRKVVVVAAAADDEEGGGG	1	AGG	R	K	634	567451	No	tRNA(CCU) appears to be arginine-type due to A20				0.65
GCA_006547005.1-AGG	93220	B	GCA_006547005.1	Pandoraea pnomenusa	FALSE	FFLLSSSSYY**CC*WLLLLPPPPHHQQRRRRIIIMTTTTNNKKSSRRVVVVAAAADDEEGGGG	FFLLSSSSYY??CC?WLLLLPPPPHHQQRRRRIIIMTTTTNNKKSSRKVVVVAAAADDEEGGGG	1	AGG	R	K	626	561329	No	tRNA(CCU) appears to be arginine-type due to A20				0.65
GCA_007833125.1-AGG	93220	B	GCA_007833125.1	Pandoraea pnomenusa	FALSE	FFLLSSSSYY**CC*WLLLLPPPPHHQQRRRRIIIMTTTTNNKKSSRRVVVVAAAADDEEGGGG	FFLLSSSSYY??CC?WLLLLPPPPHHQQRRRRIIIMTTTTNNKKSSRKVVVVAAAADDEEGGGG	1	AGG	R	K	594	564195	No	tRNA(CCU) appears to be arginine-type due to A20				0.65
GCA_900454355.1-AGG	93220	B	GCA_900454355.1	Pandoraea pnomenusa	FALSE	FFLLSSSSYY**CC*WLLLLPPPPHHQQRRRRIIIMTTTTNNKKSSRRVVVVAAAADDEEGGGG	FFLLSSSSYY??CC?WLLLLPPPPHHQQRRRRIIIMTTTTNNKKSSRKVVVVAAAADDEEGGGG	1	AGG	R	K	623	567854	No	tRNA(CCU) appears to be arginine-type due to A20				0.65
GCA_902459755.1-AGG	93220	B	GCA_902459755.1	Pandoraea pnomenusa	FALSE	FFLLSSSSYY**CC*WLLLLPPPPHHQQRRRRIIIMTTTTNNKKSSRRVVVVAAAADDEEGGGG	FFLLSSSSYY??CC?WLLLLPPPPHHQQRRRRIIIMTTTTNNKKSSRKVVVVAAAADDEEGGGG	1	AGG	R	K	633	570735	No	tRNA(CCU) appears to be arginine-type due to A20				0.65
GCA_000215705.1-AGG	94132	B	GCA_000215705.1	Ramlibacter tataouinensis TTB310	TRUE	FFLLSSSSYY**CC*WLLLLPPPPHHQQRRRRIIIMTTTTNNKKSSRRVVVVAAAADDEEGGGG	FFLLSSSSYY??CC?WLLLLPPPPHHQQRRRRIIIMTTTTNNKKSSRKVVVVAAAADDEEGGGG	1	AGG	R	K	874	409672	No	tRNA(CCU) appears to be arginine-type due to A20				0.7
GCA_000317185.3-AGG	95619	B	GCA_000317185.3	Pseudomonas sp. M1	TRUE	FFLLSSSSYY**CC*WLLLLPPPPHHQQRRRRIIIMTTTTNNKKSSRRVVVVAAAADDEEGGGG	FFLLSSSSYY??CC?WLLLLPPPPHHQQRRRRIIIMTTTTNNKKSSRKVVVVAAAADDEEGGGG	1	AGG	R	K	753	720094	No	tRNA(CCU) appears to be arginine-type due to A20				0.67
GCA_008807855.1-AGG	96344	B	GCA_008807855.1	Cupriavidus oxalaticus	TRUE	FFLLSSSSYY**CC*WLLLLPPPPHHQQRRRRIIIMTTTTNNKKSSRRVVVVAAAADDEEGGGG	FFLLSSSSYY??CC?WLLLLPPPPHHQQRRRRIIIMTTTTNNKKSSRKVVVVAAAADDEEGGGG	1	AGG	R	K	1477	720922	No	tRNA(CCU) appears to be arginine-type due to A20				0.66
GCA_001592245.1-AGG	96344	B	GCA_001592245.1	Cupriavidus oxalaticus NBRC 13593	FALSE	FFLLSSSSYY**CC*WLLLLPPPPHHQQRRRRIIIMTTTTNNKKSSRRVVVVAAAADDEEGGGG	FFLLSSSSYY??CC?WLLLLPPPPHHQQRRRRIIIMTTTTNNKKSSRKVVVVAAAADDEEGGGG	1	AGG	R	K	1371	693943	No	tRNA(CCU) appears to be arginine-type due to A20				0.67
GCA_900249725.1-AGG	96344	B	GCA_900249725.1	Cupriavidus oxalaticus	FALSE	FFLLSSSSYY**CC*WLLLLPPPPHHQQRRRRIIIMTTTTNNKKSSRRVVVVAAAADDEEGGGG	FFLLSSSSYY??CC?WLLLLPPPPHHQQRRRRIIIMTTTTNNKKSSRKVVVVAAAADDEEGGGG	1	AGG	R	K	1887	882907	No	tRNA(CCU) appears to be arginine-type due to A20				0.67
GCA_001523385.1-AGG	101571	B	GCA_001523385.1	Burkholderia ubonensis	FALSE	FFLLSSSSYY**CC*WLLLLPPPPHHQQRRRRIIIMTTTTNNKKSSRRVVVVAAAADDEEGGGG	FFLLSSSSYY??CC?WLLLLPPPPHHQQRRRRIIIMTTTTNNKKSSRKVVVVAAAADDEEGGGG	1	AGG	R	K	612	683075	No	tRNA(CCU) appears to be arginine-type due to A20				0.67
GCA_001523425.1-AGG	101571	B	GCA_001523425.1	Burkholderia ubonensis	FALSE	FFLLSSSSYY**CC*WLLLLPPPPHHQQRRRRIIIMTTTTNNKKSSRRVVVVAAAADDEEGGGG	FFLLSSSSYY??CC?WLLLLPPPPHHQQRRRRIIIMTTTTNNKKSSRKVVVVAAAADDEEGGGG	1	AGG	R	K	604	668930	No	tRNA(CCU) appears to be arginine-type due to A20				0.67
GCA_001523485.1-AGG	101571	B	GCA_001523485.1	Burkholderia ubonensis	FALSE	FFLLSSSSYY**CC*WLLLLPPPPHHQQRRRRIIIMTTTTNNKKSSRRVVVVAAAADDEEGGGG	FFLLSSSSYY??CC?WLLLLPPPPHHQQRRRRIIIMTTTTNNKKSSRKVVVVAAAADDEEGGGG	1	AGG	R	K	649	692034	No	tRNA(CCU) appears to be arginine-type due to A20				0.67
GCA_001526625.1-AGG	101571	B	GCA_001526625.1	Burkholderia ubonensis	FALSE	FFLLSSSSYY**CC*WLLLLPPPPHHQQRRRRIIIMTTTTNNKKSSRRVVVVAAAADDEEGGGG	FFLLSSSSYY??CC?WLLLLPPPPHHQQRRRRIIIMTTTTNNKKSSRKVVVVAAAADDEEGGGG	1	AGG	R	K	630	666348	No	tRNA(CCU) appears to be arginine-type due to A20				0.68
GCA_001527165.1-AGG	101571	B	GCA_001527165.1	Burkholderia ubonensis	FALSE	FFLLSSSSYY**CC*WLLLLPPPPHHQQRRRRIIIMTTTTNNKKSSRRVVVVAAAADDEEGGGG	FFLLSSSSYY??CC?WLLLLPPPPHHQQRRRRIIIMTTTTNNKKSSRKVVVVAAAADDEEGGGG	1	AGG	R	K	620	668589	No	tRNA(CCU) appears to be arginine-type due to A20				0.67
GCA_001527185.1-AGG	101571	B	GCA_001527185.1	Burkholderia ubonensis	FALSE	FFLLSSSSYY**CC*WLLLLPPPPHHQQRRRRIIIMTTTTNNKKSSRRVVVVAAAADDEEGGGG	FFLLSSSSYY??CC?WLLLLPPPPHHQQRRRRIIIMTTTTNNKKSSRKVVVVAAAADDEEGGGG	1	AGG	R	K	621	670647	No	tRNA(CCU) appears to be arginine-type due to A20				0.68
GCA_001527465.1-AGG	101571	B	GCA_001527465.1	Burkholderia ubonensis	FALSE	FFLLSSSSYY**CC*WLLLLPPPPHHQQRRRRIIIMTTTTNNKKSSRRVVVVAAAADDEEGGGG	FFLLSSSSYY??CC?WLLLLPPPPHHQQRRRRIIIMTTTTNNKKSSRKVVVVAAAADDEEGGGG	1	AGG	R	K	675	700979	No	tRNA(CCU) appears to be arginine-type due to A20				0.67
GCA_001528065.1-AGG	101571	B	GCA_001528065.1	Burkholderia ubonensis	FALSE	FFLLSSSSYY**CC*WLLLLPPPPHHQQRRRRIIIMTTTTNNKKSSRRVVVVAAAADDEEGGGG	FFLLSSSSYY??CC?WLLLLPPPPHHQQRRRRIIIMTTTTNNKKSSRKVVVVAAAADDEEGGGG	1	AGG	R	K	602	660602	No	tRNA(CCU) appears to be arginine-type due to A20				0.67
GCA_001528095.1-AGG	101571	B	GCA_001528095.1	Burkholderia ubonensis	FALSE	FFLLSSSSYY**CC*WLLLLPPPPHHQQRRRRIIIMTTTTNNKKSSRRVVVVAAAADDEEGGGG	FFLLSSSSYY??CC?WLLLLPPPPHHQQRRRRIIIMTTTTNNKKSSRKVVVVAAAADDEEGGGG	1	AGG	R	K	640	695450	No	tRNA(CCU) appears to be arginine-type due to A20				0.67
GCA_001528205.1-AGG	101571	B	GCA_001528205.1	Burkholderia ubonensis	FALSE	FFLLSSSSYY**CC*WLLLLPPPPHHQQRRRRIIIMTTTTNNKKSSRRVVVVAAAADDEEGGGG	FFLLSSSSYY??CC?WLLLLPPPPHHQQRRRRIIIMTTTTNNKKSSRKVVVVAAAADDEEGGGG	1	AGG	R	K	674	679512	No	tRNA(CCU) appears to be arginine-type due to A20				0.67
GCA_001528245.1-AGG	101571	B	GCA_001528245.1	Burkholderia ubonensis	FALSE	FFLLSSSSYY**CC*WLLLLPPPPHHQQRRRRIIIMTTTTNNKKSSRRVVVVAAAADDEEGGGG	FFLLSSSSYY??CC?WLLLLPPPPHHQQRRRRIIIMTTTTNNKKSSRKVVVVAAAADDEEGGGG	1	AGG	R	K	603	665768	No	tRNA(CCU) appears to be arginine-type due to A20				0.68
GCA_001528445.1-AGG	101571	B	GCA_001528445.1	Burkholderia ubonensis	FALSE	FFLLSSSSYY**CC*WLLLLPPPPHHQQRRRRIIIMTTTTNNKKSSRRVVVVAAAADDEEGGGG	FFLLSSSSYY??CC?WLLLLPPPPHHQQRRRRIIIMTTTTNNKKSSRKVVVVAAAADDEEGGGG	1	AGG	R	K	622	678548	No	tRNA(CCU) appears to be arginine-type due to A20				0.67
GCA_001528645.1-AGG	101571	B	GCA_001528645.1	Burkholderia ubonensis	FALSE	FFLLSSSSYY**CC*WLLLLPPPPHHQQRRRRIIIMTTTTNNKKSSRRVVVVAAAADDEEGGGG	FFLLSSSSYY??CC?WLLLLPPPPHHQQRRRRIIIMTTTTNNKKSSRKVVVVAAAADDEEGGGG	1	AGG	R	K	714	693633	No	tRNA(CCU) appears to be arginine-type due to A20				0.67
GCA_001528655.1-AGG	101571	B	GCA_001528655.1	Burkholderia ubonensis	FALSE	FFLLSSSSYY**CC*WLLLLPPPPHHQQRRRRIIIMTTTTNNKKSSRRVVVVAAAADDEEGGGG	FFLLSSSSYY??CC?WLLLLPPPPHHQQRRRRIIIMTTTTNNKKSSRKVVVVAAAADDEEGGGG	1	AGG	R	K	720	702029	No	tRNA(CCU) appears to be arginine-type due to A20				0.67
GCA_001528765.1-AGG	101571	B	GCA_001528765.1	Burkholderia ubonensis	FALSE	FFLLSSSSYY**CC*WLLLLPPPPHHQQRRRRIIIMTTTTNNKKSSRRVVVVAAAADDEEGGGG	FFLLSSSSYY??CC?WLLLLPPPPHHQQRRRRIIIMTTTTNNKKSSRKVVVVAAAADDEEGGGG	1	AGG	R	K	715	694848	No	tRNA(CCU) appears to be arginine-type due to A20				0.67
GCA_001528785.1-AGG	101571	B	GCA_001528785.1	Burkholderia ubonensis	FALSE	FFLLSSSSYY**CC*WLLLLPPPPHHQQRRRRIIIMTTTTNNKKSSRRVVVVAAAADDEEGGGG	FFLLSSSSYY??CC?WLLLLPPPPHHQQRRRRIIIMTTTTNNKKSSRKVVVVAAAADDEEGGGG	1	AGG	R	K	719	697939	No	tRNA(CCU) appears to be arginine-type due to A20				0.67
GCA_001528805.1-AGG	101571	B	GCA_001528805.1	Burkholderia ubonensis	FALSE	FFLLSSSSYY**CC*WLLLLPPPPHHQQRRRRIIIMTTTTNNKKSSRRVVVVAAAADDEEGGGG	FFLLSSSSYY??CC?WLLLLPPPPHHQQRRRRIIIMTTTTNNKKSSRKVVVVAAAADDEEGGGG	1	AGG	R	K	725	711070	No	tRNA(CCU) appears to be arginine-type due to A20				0.67
GCA_001528865.1-AGG	101571	B	GCA_001528865.1	Burkholderia ubonensis	FALSE	FFLLSSSSYY**CC*WLLLLPPPPHHQQRRRRIIIMTTTTNNKKSSRRVVVVAAAADDEEGGGG	FFLLSSSSYY??CC?WLLLLPPPPHHQQRRRRIIIMTTTTNNKKSSRKVVVVAAAADDEEGGGG	1	AGG	R	K	616	674146	No	tRNA(CCU) appears to be arginine-type due to A20				0.67
GCA_001528945.1-AGG	101571	B	GCA_001528945.1	Burkholderia ubonensis	FALSE	FFLLSSSSYY**CC*WLLLLPPPPHHQQRRRRIIIMTTTTNNKKSSRRVVVVAAAADDEEGGGG	FFLLSSSSYY??CC?WLLLLPPPPHHQQRRRRIIIMTTTTNNKKSSRKVVVVAAAADDEEGGGG	1	AGG	R	K	697	709939	No	tRNA(CCU) appears to be arginine-type due to A20				0.67
GCA_001529205.1-AGG	101571	B	GCA_001529205.1	Burkholderia ubonensis	FALSE	FFLLSSSSYY**CC*WLLLLPPPPHHQQRRRRIIIMTTTTNNKKSSRRVVVVAAAADDEEGGGG	FFLLSSSSYY??CC?WLLLLPPPPHHQQRRRRIIIMTTTTNNKKSSRKVVVVAAAADDEEGGGG	1	AGG	R	K	629	679002	No	tRNA(CCU) appears to be arginine-type due to A20				0.67
GCA_001529655.1-AGG	101571	B	GCA_001529655.1	Burkholderia ubonensis	FALSE	FFLLSSSSYY**CC*WLLLLPPPPHHQQRRRRIIIMTTTTNNKKSSRRVVVVAAAADDEEGGGG	FFLLSSSSYY??CC?WLLLLPPPPHHQQRRRRIIIMTTTTNNKKSSRKVVVVAAAADDEEGGGG	1	AGG	R	K	604	667414	No	tRNA(CCU) appears to be arginine-type due to A20				0.67
GCA_001529725.1-AGG	101571	B	GCA_001529725.1	Burkholderia ubonensis	FALSE	FFLLSSSSYY**CC*WLLLLPPPPHHQQRRRRIIIMTTTTNNKKSSRRVVVVAAAADDEEGGGG	FFLLSSSSYY??CC?WLLLLPPPPHHQQRRRRIIIMTTTTNNKKSSRKVVVVAAAADDEEGGGG	1	AGG	R	K	715	707420	No	tRNA(CCU) appears to be arginine-type due to A20				0.67
GCA_001530245.1-AGG	101571	B	GCA_001530245.1	Burkholderia ubonensis	FALSE	FFLLSSSSYY**CC*WLLLLPPPPHHQQRRRRIIIMTTTTNNKKSSRRVVVVAAAADDEEGGGG	FFLLSSSSYY??CC?WLLLLPPPPHHQQRRRRIIIMTTTTNNKKSSRKVVVVAAAADDEEGGGG	1	AGG	R	K	669	687818	No	tRNA(CCU) appears to be arginine-type due to A20				0.67
GCA_001530565.1-AGG	101571	B	GCA_001530565.1	Burkholderia ubonensis	FALSE	FFLLSSSSYY**CC*WLLLLPPPPHHQQRRRRIIIMTTTTNNKKSSRRVVVVAAAADDEEGGGG	FFLLSSSSYY??CC?WLLLLPPPPHHQQRRRRIIIMTTTTNNKKSSRKVVVVAAAADDEEGGGG	1	AGG	R	K	621	668440	No	tRNA(CCU) appears to be arginine-type due to A20				0.67
GCA_001531515.1-AGG	101571	B	GCA_001531515.1	Burkholderia ubonensis	FALSE	FFLLSSSSYY**CC*WLLLLPPPPHHQQRRRRIIIMTTTTNNKKSSRRVVVVAAAADDEEGGGG	FFLLSSSSYY??CC?WLLLLPPPPHHQQRRRRIIIMTTTTNNKKSSRKVVVVAAAADDEEGGGG	1	AGG	R	K	661	687618	No	tRNA(CCU) appears to be arginine-type due to A20				0.67
GCA_001531825.1-AGG	101571	B	GCA_001531825.1	Burkholderia ubonensis	FALSE	FFLLSSSSYY**CC*WLLLLPPPPHHQQRRRRIIIMTTTTNNKKSSRRVVVVAAAADDEEGGGG	FFLLSSSSYY??CC?WLLLLPPPPHHQQRRRRIIIMTTTTNNKKSSRKVVVVAAAADDEEGGGG	1	AGG	R	K	658	682792	No	tRNA(CCU) appears to be arginine-type due to A20				0.67
GCA_001532455.1-AGG	101571	B	GCA_001532455.1	Burkholderia ubonensis	FALSE	FFLLSSSSYY**CC*WLLLLPPPPHHQQRRRRIIIMTTTTNNKKSSRRVVVVAAAADDEEGGGG	FFLLSSSSYY??CC?WLLLLPPPPHHQQRRRRIIIMTTTTNNKKSSRKVVVVAAAADDEEGGGG	1	AGG	R	K	619	678892	No	tRNA(CCU) appears to be arginine-type due to A20				0.68
GCA_001532465.1-AGG	101571	B	GCA_001532465.1	Burkholderia ubonensis	FALSE	FFLLSSSSYY**CC*WLLLLPPPPHHQQRRRRIIIMTTTTNNKKSSRRVVVVAAAADDEEGGGG	FFLLSSSSYY??CC?WLLLLPPPPHHQQRRRRIIIMTTTTNNKKSSRKVVVVAAAADDEEGGGG	1	AGG	R	K	627	676849	No	tRNA(CCU) appears to be arginine-type due to A20				0.67
GCA_001533285.1-AGG	101571	B	GCA_001533285.1	Burkholderia ubonensis	FALSE	FFLLSSSSYY**CC*WLLLLPPPPHHQQRRRRIIIMTTTTNNKKSSRRVVVVAAAADDEEGGGG	FFLLSSSSYY??CC?WLLLLPPPPHHQQRRRRIIIMTTTTNNKKSSRKVVVVAAAADDEEGGGG	1	AGG	R	K	615	674324	No	tRNA(CCU) appears to be arginine-type due to A20				0.67
GCA_001533535.1-AGG	101571	B	GCA_001533535.1	Burkholderia ubonensis	FALSE	FFLLSSSSYY**CC*WLLLLPPPPHHQQRRRRIIIMTTTTNNKKSSRRVVVVAAAADDEEGGGG	FFLLSSSSYY??CC?WLLLLPPPPHHQQRRRRIIIMTTTTNNKKSSRKVVVVAAAADDEEGGGG	1	AGG	R	K	604	669129	No	tRNA(CCU) appears to be arginine-type due to A20				0.67
GCA_001533565.1-AGG	101571	B	GCA_001533565.1	Burkholderia ubonensis	FALSE	FFLLSSSSYY**CC*WLLLLPPPPHHQQRRRRIIIMTTTTNNKKSSRRVVVVAAAADDEEGGGG	FFLLSSSSYY??CC?WLLLLPPPPHHQQRRRRIIIMTTTTNNKKSSRKVVVVAAAADDEEGGGG	1	AGG	R	K	607	672681	No	tRNA(CCU) appears to be arginine-type due to A20				0.67
GCA_001533625.1-AGG	101571	B	GCA_001533625.1	Burkholderia ubonensis	FALSE	FFLLSSSSYY**CC*WLLLLPPPPHHQQRRRRIIIMTTTTNNKKSSRRVVVVAAAADDEEGGGG	FFLLSSSSYY??CC?WLLLLPPPPHHQQRRRRIIIMTTTTNNKKSSRKVVVVAAAADDEEGGGG	1	AGG	R	K	601	666739	No	tRNA(CCU) appears to be arginine-type due to A20				0.67
GCA_001533655.1-AGG	101571	B	GCA_001533655.1	Burkholderia ubonensis	FALSE	FFLLSSSSYY**CC*WLLLLPPPPHHQQRRRRIIIMTTTTNNKKSSRRVVVVAAAADDEEGGGG	FFLLSSSSYY??CC?WLLLLPPPPHHQQRRRRIIIMTTTTNNKKSSRKVVVVAAAADDEEGGGG	1	AGG	R	K	609	670852	No	tRNA(CCU) appears to be arginine-type due to A20				0.67
GCA_001533765.1-AGG	101571	B	GCA_001533765.1	Burkholderia ubonensis	FALSE	FFLLSSSSYY**CC*WLLLLPPPPHHQQRRRRIIIMTTTTNNKKSSRRVVVVAAAADDEEGGGG	FFLLSSSSYY??CC?WLLLLPPPPHHQQRRRRIIIMTTTTNNKKSSRKVVVVAAAADDEEGGGG	1	AGG	R	K	605	675360	No	tRNA(CCU) appears to be arginine-type due to A20				0.68
GCA_001533785.1-AGG	101571	B	GCA_001533785.1	Burkholderia ubonensis	FALSE	FFLLSSSSYY**CC*WLLLLPPPPHHQQRRRRIIIMTTTTNNKKSSRRVVVVAAAADDEEGGGG	FFLLSSSSYY??CC?WLLLLPPPPHHQQRRRRIIIMTTTTNNKKSSRKVVVVAAAADDEEGGGG	1	AGG	R	K	600	673097	No	tRNA(CCU) appears to be arginine-type due to A20				0.68
GCA_001533865.1-AGG	101571	B	GCA_001533865.1	Burkholderia ubonensis	FALSE	FFLLSSSSYY**CC*WLLLLPPPPHHQQRRRRIIIMTTTTNNKKSSRRVVVVAAAADDEEGGGG	FFLLSSSSYY??CC?WLLLLPPPPHHQQRRRRIIIMTTTTNNKKSSRKVVVVAAAADDEEGGGG	1	AGG	R	K	603	671429	No	tRNA(CCU) appears to be arginine-type due to A20				0.68
GCA_001534065.1-AGG	101571	B	GCA_001534065.1	Burkholderia ubonensis	FALSE	FFLLSSSSYY**CC*WLLLLPPPPHHQQRRRRIIIMTTTTNNKKSSRRVVVVAAAADDEEGGGG	FFLLSSSSYY??CC?WLLLLPPPPHHQQRRRRIIIMTTTTNNKKSSRKVVVVAAAADDEEGGGG	1	AGG	R	K	709	704302	No	tRNA(CCU) appears to be arginine-type due to A20				0.67
GCA_001534195.1-AGG	101571	B	GCA_001534195.1	Burkholderia ubonensis	FALSE	FFLLSSSSYY**CC*WLLLLPPPPHHQQRRRRIIIMTTTTNNKKSSRRVVVVAAAADDEEGGGG	FFLLSSSSYY??CC?WLLLLPPPPHHQQRRRRIIIMTTTTNNKKSSRKVVVVAAAADDEEGGGG	1	AGG	R	K	603	670896	No	tRNA(CCU) appears to be arginine-type due to A20				0.67
GCA_001534445.1-AGG	101571	B	GCA_001534445.1	Burkholderia ubonensis	FALSE	FFLLSSSSYY**CC*WLLLLPPPPHHQQRRRRIIIMTTTTNNKKSSRRVVVVAAAADDEEGGGG	FFLLSSSSYY??CC?WLLLLPPPPHHQQRRRRIIIMTTTTNNKKSSRKVVVVAAAADDEEGGGG	1	AGG	R	K	641	695514	No	tRNA(CCU) appears to be arginine-type due to A20				0.67
GCA_001534475.1-AGG	101571	B	GCA_001534475.1	Burkholderia ubonensis	FALSE	FFLLSSSSYY**CC*WLLLLPPPPHHQQRRRRIIIMTTTTNNKKSSRRVVVVAAAADDEEGGGG	FFLLSSSSYY??CC?WLLLLPPPPHHQQRRRRIIIMTTTTNNKKSSRKVVVVAAAADDEEGGGG	1	AGG	R	K	619	673874	No	tRNA(CCU) appears to be arginine-type due to A20				0.68
GCA_001718975.1-AGG	101571	B	GCA_001718975.1	Burkholderia ubonensis	FALSE	FFLLSSSSYY**CC*WLLLLPPPPHHQQRRRRIIIMTTTTNNKKSSRRVVVVAAAADDEEGGGG	FFLLSSSSYY??CC?WLLLLPPPPHHQQRRRRIIIMTTTTNNKKSSRKVVVVAAAADDEEGGGG	1	AGG	R	K	710	701139	No	tRNA(CCU) appears to be arginine-type due to A20				0.67
GCA_001722225.1-AGG	101571	B	GCA_001722225.1	Burkholderia ubonensis	FALSE	FFLLSSSSYY**CC*WLLLLPPPPHHQQRRRRIIIMTTTTNNKKSSRRVVVVAAAADDEEGGGG	FFLLSSSSYY??CC?WLLLLPPPPHHQQRRRRIIIMTTTTNNKKSSRKVVVVAAAADDEEGGGG	1	AGG	R	K	607	665889	No	tRNA(CCU) appears to be arginine-type due to A20				0.68
GCA_001722235.1-AGG	101571	B	GCA_001722235.1	Burkholderia ubonensis	FALSE	FFLLSSSSYY**CC*WLLLLPPPPHHQQRRRRIIIMTTTTNNKKSSRRVVVVAAAADDEEGGGG	FFLLSSSSYY??CC?WLLLLPPPPHHQQRRRRIIIMTTTTNNKKSSRKVVVVAAAADDEEGGGG	1	AGG	R	K	715	703687	No	tRNA(CCU) appears to be arginine-type due to A20				0.67
GCA_001882635.1-AGG	101571	B	GCA_001882635.1	Burkholderia ubonensis	FALSE	FFLLSSSSYY**CC*WLLLLPPPPHHQQRRRRIIIMTTTTNNKKSSRRVVVVAAAADDEEGGGG	FFLLSSSSYY??CC?WLLLLPPPPHHQQRRRRIIIMTTTTNNKKSSRKVVVVAAAADDEEGGGG	1	AGG	R	K	615	665550	No	tRNA(CCU) appears to be arginine-type due to A20				0.67
GCA_001882755.1-AGG	101571	B	GCA_001882755.1	Burkholderia ubonensis	FALSE	FFLLSSSSYY**CC*WLLLLPPPPHHQQRRRRIIIMTTTTNNKKSSRRVVVVAAAADDEEGGGG	FFLLSSSSYY??CC?WLLLLPPPPHHQQRRRRIIIMTTTTNNKKSSRKVVVVAAAADDEEGGGG	1	AGG	R	K	679	732899	No	tRNA(CCU) appears to be arginine-type due to A20				0.67
GCA_001882845.1-AGG	101571	B	GCA_001882845.1	Burkholderia ubonensis	FALSE	FFLLSSSSYY**CC*WLLLLPPPPHHQQRRRRIIIMTTTTNNKKSSRRVVVVAAAADDEEGGGG	FFLLSSSSYY??CC?WLLLLPPPPHHQQRRRRIIIMTTTTNNKKSSRKVVVVAAAADDEEGGGG	1	AGG	R	K	611	670059	No	tRNA(CCU) appears to be arginine-type due to A20				0.67
GCA_002276075.1-AGG	101571	B	GCA_002276075.1	Burkholderia ubonensis	FALSE	FFLLSSSSYY**CC*WLLLLPPPPHHQQRRRRIIIMTTTTNNKKSSRRVVVVAAAADDEEGGGG	FFLLSSSSYY??CC?WLLLLPPPPHHQQRRRRIIIMTTTTNNKKSSRKVVVVAAAADDEEGGGG	1	AGG	R	K	658	699258	No	tRNA(CCU) appears to be arginine-type due to A20				0.67
GCA_002276095.1-AGG	101571	B	GCA_002276095.1	Burkholderia ubonensis	FALSE	FFLLSSSSYY**CC*WLLLLPPPPHHQQRRRRIIIMTTTTNNKKSSRRVVVVAAAADDEEGGGG	FFLLSSSSYY??CC?WLLLLPPPPHHQQRRRRIIIMTTTTNNKKSSRKVVVVAAAADDEEGGGG	1	AGG	R	K	670	701633	No	tRNA(CCU) appears to be arginine-type due to A20				0.67
GCA_003853005.1-AGG	101571	B	GCA_003853005.1	Burkholderia ubonensis	FALSE	FFLLSSSSYY**CC*WLLLLPPPPHHQQRRRRIIIMTTTTNNKKSSRRVVVVAAAADDEEGGGG	FFLLSSSSYY??CC?WLLLLPPPPHHQQRRRRIIIMTTTTNNKKSSRKVVVVAAAADDEEGGGG	1	AGG	R	K	659	704489	No	tRNA(CCU) appears to be arginine-type due to A20				0.67
GCA_003853095.1-AGG	101571	B	GCA_003853095.1	Burkholderia ubonensis	FALSE	FFLLSSSSYY**CC*WLLLLPPPPHHQQRRRRIIIMTTTTNNKKSSRRVVVVAAAADDEEGGGG	FFLLSSSSYY??CC?WLLLLPPPPHHQQRRRRIIIMTTTTNNKKSSRKVVVVAAAADDEEGGGG	1	AGG	R	K	665	703386	No	tRNA(CCU) appears to be arginine-type due to A20				0.67
GCA_000954135.2-AGG	105219	B	GCA_000954135.2	Ralstonia mannitolilytica	TRUE	FFLLSSSSYY**CC*WLLLLPPPPHHQQRRRRIIIMTTTTNNKKSSRRVVVVAAAADDEEGGGG	FFLLSSSSYY??CC?WLLLLPPPPHHQQRRRRIIIMTTTTNNKKSSRKVVVVAAAADDEEGGGG	1	AGG	R	K	505	549590	No	tRNA(CCU) appears to be arginine-type due to A20				0.65
GCA_000953875.1-AGG	105219	B	GCA_000953875.1	Ralstonia mannitolilytica	FALSE	FFLLSSSSYY**CC*WLLLLPPPPHHQQRRRRIIIMTTTTNNKKSSRRVVVVAAAADDEEGGGG	FFLLSSSSYY??CC?WLLLLPPPPHHQQRRRRIIIMTTTTNNKKSSRKVVVVAAAADDEEGGGG	1	AGG	R	K	483	524935	No	tRNA(CCU) appears to be arginine-type due to A20				0.66
GCA_002863525.1-AGG	105219	B	GCA_002863525.1	Ralstonia mannitolilytica	FALSE	FFLLSSSSYY**CC*WLLLLPPPPHHQQRRRRIIIMTTTTNNKKSSRRVVVVAAAADDEEGGGG	FFLLSSSSYY??CC?WLLLLPPPPHHQQRRRRIIIMTTTTNNKKSSRKVVVVAAAADDEEGGGG	1	AGG	R	K	491	535105	No	tRNA(CCU) appears to be arginine-type due to A20				0.66
GCA_002939115.1-AGG	105219	B	GCA_002939115.1	Ralstonia mannitolilytica	FALSE	FFLLSSSSYY**CC*WLLLLPPPPHHQQRRRRIIIMTTTTNNKKSSRRVVVVAAAADDEEGGGG	FFLLSSSSYY??CC?WLLLLPPPPHHQQRRRRIIIMTTTTNNKKSSRKVVVVAAAADDEEGGGG	1	AGG	R	K	461	530552	No	tRNA(CCU) appears to be arginine-type due to A20				0.66
GCA_002939145.1-AGG	105219	B	GCA_002939145.1	Ralstonia mannitolilytica	FALSE	FFLLSSSSYY**CC*WLLLLPPPPHHQQRRRRIIIMTTTTNNKKSSRRVVVVAAAADDEEGGGG	FFLLSSSSYY??CC?WLLLLPPPPHHQQRRRRIIIMTTTTNNKKSSRKVVVVAAAADDEEGGGG	1	AGG	R	K	395	535169	No	tRNA(CCU) appears to be arginine-type due to A20				0.66
GCA_011044515.1-AGG	105219	B	GCA_011044515.1	Ralstonia mannitolilytica	FALSE	FFLLSSSSYY**CC*WLLLLPPPPHHQQRRRRIIIMTTTTNNKKSSRRVVVVAAAADDEEGGGG	FFLLSSSSYY??CC?WLLLLPPPPHHQQRRRRIIIMTTTTNNKKSSRKVVVVAAAADDEEGGGG	1	AGG	R	K	460	522494	No	tRNA(CCU) appears to be arginine-type due to A20				0.66
GCA_900455575.1-AGG	105219	B	GCA_900455575.1	Ralstonia mannitolilytica	FALSE	FFLLSSSSYY**CC*WLLLLPPPPHHQQRRRRIIIMTTTTNNKKSSRRVVVVAAAADDEEGGGG	FFLLSSSSYY??CC?WLLLLPPPPHHQQRRRRIIIMTTTTNNKKSSRKVVVVAAAADDEEGGGG	1	AGG	R	K	482	537566	No	tRNA(CCU) appears to be arginine-type due to A20				0.66
GCA_900455685.1-AGG	105219	B	GCA_900455685.1	Ralstonia mannitolilytica	FALSE	FFLLSSSSYY**CC*WLLLLPPPPHHQQRRRRIIIMTTTTNNKKSSRRVVVVAAAADDEEGGGG	FFLLSSSSYY??CC?WLLLLPPPPHHQQRRRRIIIMTTTTNNKKSSRKVVVVAAAADDEEGGGG	1	AGG	R	K	485	539683	No	tRNA(CCU) appears to be arginine-type due to A20				0.66
GCA_900461715.1-AGG	105219	B	GCA_900461715.1	Ralstonia mannitolilytica	FALSE	FFLLSSSSYY**CC*WLLLLPPPPHHQQRRRRIIIMTTTTNNKKSSRRVVVVAAAADDEEGGGG	FFLLSSSSYY??CC?WLLLLPPPPHHQQRRRRIIIMTTTTNNKKSSRKVVVVAAAADDEEGGGG	1	AGG	R	K	468	533983	No	tRNA(CCU) appears to be arginine-type due to A20				0.66
GCA_000009285.2-AGG	106590	B	GCA_000009285.2	Cupriavidus necator H16	FALSE	FFLLSSSSYY**CC*WLLLLPPPPHHQQRRRRIIIMTTTTNNKKSSRRVVVVAAAADDEEGGGG	FFLLSSSSYY??CC?WLLLLPPPPHHQQRRRRIIIMTTTTNNKKSSRKVVVVAAAADDEEGGGG	1	AGG	R	K	1440	756154	No	tRNA(CCU) appears to be arginine-type due to A20				0.66
GCA_001598755.1-AGG	106590	B	GCA_001598755.1	Cupriavidus necator NBRC 102504	FALSE	FFLLSSSSYY**CC*WLLLLPPPPHHQQRRRRIIIMTTTTNNKKSSRRVVVVAAAADDEEGGGG	FFLLSSSSYY??CC?WLLLLPPPPHHQQRRRRIIIMTTTTNNKKSSRKVVVVAAAADDEEGGGG	1	AGG	R	K	1398	747907	No	tRNA(CCU) appears to be arginine-type due to A20				0.67
GCA_002011925.2-AGG	106590	B	GCA_002011925.2	Cupriavidus necator	FALSE	FFLLSSSSYY**CC*WLLLLPPPPHHQQRRRRIIIMTTTTNNKKSSRRVVVVAAAADDEEGGGG	FFLLSSSSYY??CC?WLLLLPPPPHHQQRRRRIIIMTTTTNNKKSSRKVVVVAAAADDEEGGGG	1	AGG	R	K	1872	817299	No	tRNA(CCU) appears to be arginine-type due to A20				0.65
GCA_004798725.1-AGG	106590	B	GCA_004798725.1	Cupriavidus necator H16	FALSE	FFLLSSSSYY**CC*WLLLLPPPPHHQQRRRRIIIMTTTTNNKKSSRRVVVVAAAADDEEGGGG	FFLLSSSSYY??CC?WLLLLPPPPHHQQRRRRIIIMTTTTNNKKSSRKVVVVAAAADDEEGGGG	1	AGG	R	K	1440	755992	No	tRNA(CCU) appears to be arginine-type due to A20				0.66
GCA_009663685.1-AGG	106590	B	GCA_009663685.1	Cupriavidus necator	FALSE	FFLLSSSSYY**CC*WLLLLPPPPHHQQRRRRIIIMTTTTNNKKSSRRVVVVAAAADDEEGGGG	FFLLSSSSYY??CC?WLLLLPPPPHHQQRRRRIIIMTTTTNNKKSSRKVVVVAAAADDEEGGGG	1	AGG	R	K	901	671347	No	tRNA(CCU) appears to be arginine-type due to A20				0.65
GCA_000013985.1-AGG	117207	B	GCA_000013985.1	Sphingopyxis alaskensis RB2256	TRUE	FFLLSSSSYY**CC*WLLLLPPPPHHQQRRRRIIIMTTTTNNKKSSRRVVVVAAAADDEEGGGG	FFLLSSSSYY??CC?WLLLLPPPPHHQQRRRRIIIMTTTTNNKKSSRKVVVVAAAADDEEGGGG	1	AGG	R	K	751	355142	No	tRNA(CCU) appears to be arginine-type due to A20				0.65
GCA_900696425.1-AGG	120965	B	GCA_900696425.1	uncultured planctomycete	FALSE	FFLLSSSSYY**CC*WLLLLPPPPHHQQRRRRIIIMTTTTNNKKSSRRVVVVAAAADDEEGGGG	FFLLSSSSYY??CC?WLLLLPPPPHHQQRRRRIIIMTTTTNNKKSSRKVVVVAAAADDEEGGGG	1	AGG	R	K	635	238230	No	tRNA(CCU) appears to be arginine-type due to A20				0.67
GCA_900696525.1-AGG	120965	B	GCA_900696525.1	uncultured planctomycete	FALSE	FFLLSSSSYY**CC*WLLLLPPPPHHQQRRRRIIIMTTTTNNKKSSRRVVVVAAAADDEEGGGG	FFLLSSSSYY??CC?WLLLLPPPPHHQQRRRRIIIMTTTTNNKKSSRKVVVVAAAADDEEGGGG	1	AGG	R	K	421	236433	No	tRNA(CCU) appears to be arginine-type due to A20				0.7
GCA_004342175.1-AGG	127458	B	GCA_004342175.1	Thiobaca trueperi	TRUE	FFLLSSSSYY**CC*WLLLLPPPPHHQQRRRRIIIMTTTTNNKKSSRRVVVVAAAADDEEGGGG	FFLLSSSSYY??CC?WLLLLPPPPHHQQRRRRIIIMTTTTNNKKSSRKVVVVAAAADDEEGGGG	1	AGG	R	K	767	439628	No	tRNA(CCU) appears to be arginine-type due to A20				0.62
GCA_001314305.1-AGG	128780	B	GCA_001314305.1	Stenotrophomonas acidaminiphila	TRUE	FFLLSSSSYY**CC*WLLLLPPPPHHQQRRRRIIIMTTTTNNKKSSRRVVVVAAAADDEEGGGG	FFLLSSSSYY??CC?WLLLLPPPPHHQQRRRRIIIMTTTTNNKKSSRKVVVVAAAADDEEGGGG	1	AGG	R	K	663	410122	No	tRNA(CCU) appears to be arginine-type due to A20				0.68
GCA_001431595.1-AGG	128780	B	GCA_001431595.1	Stenotrophomonas acidaminiphila	FALSE	FFLLSSSSYY**CC*WLLLLPPPPHHQQRRRRIIIMTTTTNNKKSSRRVVVVAAAADDEEGGGG	FFLLSSSSYY??CC?WLLLLPPPPHHQQRRRRIIIMTTTTNNKKSSRKVVVVAAAADDEEGGGG	1	AGG	R	K	658	408806	No	tRNA(CCU) appears to be arginine-type due to A20				0.69
GCA_002296645.1-AGG	128780	B	GCA_002296645.1	Stenotrophomonas acidaminiphila	FALSE	FFLLSSSSYY**CC*WLLLLPPPPHHQQRRRRIIIMTTTTNNKKSSRRVVVVAAAADDEEGGGG	FF?LSSSSYY??CC?WLLLLPPPPHHQQRRRRIIIMTTTTNNKKSSRKVVVVAAAADDEEGGGG	1	AGG	R	K	583	356312	No	tRNA(CCU) appears to be arginine-type due to A20				0.69
GCA_002438185.1-AGG	128780	B	GCA_002438185.1	Stenotrophomonas acidaminiphila	FALSE	FFLLSSSSYY**CC*WLLLLPPPPHHQQRRRRIIIMTTTTNNKKSSRRVVVVAAAADDEEGGGG	FFLLSSSSYY??CC?WLLLLPPPPHHQQRRRRIIIMTTTTNNKKSSRKVVVVAAAADDEEGGGG	1	AGG	R	K	607	373334	No	tRNA(CCU) appears to be arginine-type due to A20				0.69
GCA_002472785.1-AGG	128780	B	GCA_002472785.1	Stenotrophomonas acidaminiphila	FALSE	FFLLSSSSYY**CC*WLLLLPPPPHHQQRRRRIIIMTTTTNNKKSSRRVVVVAAAADDEEGGGG	FFLLSSSSYY??CC?WLLLLPPPPHHQQRRRRIIIMTTTTNNKKSSRKVVVVAAAADDEEGGGG	1	AGG	R	K	638	383509	No	tRNA(CCU) appears to be arginine-type due to A20				0.69
GCA_002951995.1-AGG	128780	B	GCA_002951995.1	Stenotrophomonas acidaminiphila	FALSE	FFLLSSSSYY**CC*WLLLLPPPPHHQQRRRRIIIMTTTTNNKKSSRRVVVVAAAADDEEGGGG	FFLLSSSSYY??CC?WLLLLPPPPHHQQRRRRIIIMTTTTNNKKSS?KVVVVAAAADDEEGGGG	1	AGG	R	K	526	375130	No	tRNA(CCU) appears to be arginine-type due to A20				0.7
GCA_009996725.1-AGG	128780	B	GCA_009996725.1	Stenotrophomonas acidaminiphila	FALSE	FFLLSSSSYY**CC*WLLLLPPPPHHQQRRRRIIIMTTTTNNKKSSRRVVVVAAAADDEEGGGG	FFLLSSSSYY??CC?WLLLLPPPPHHQQRRRRIIIMTTTTNNKKSSRKVVVVAAAADDEEGGGG	1	AGG	R	K	604	416875	No	tRNA(CCU) appears to be arginine-type due to A20				0.69
GCA_000281175.1-AGG	133453	B	GCA_000281175.1	Caldilinea aerophila DSM 14535 = NBRC 104270	TRUE	FFLLSSSSYY**CC*WLLLLPPPPHHQQRRRRIIIMTTTTNNKKSSRRVVVVAAAADDEEGGGG	FFLLSSSSYY??CC?WLLLLPPPPHHQQRRRRIIIMTTTTNNKKSSRKVVVVAAAADDEEGGGG	1	AGG	R	K	778	475972	No	tRNA(CCU) appears to be arginine-type due to A20				0.59
GCA_011047835.1-AGG	133453	B	GCA_011047835.1	Caldilinea aerophila	FALSE	FFLLSSSSYY**CC*WLLLLPPPPHHQQRRRRIIIMTTTTNNKKSSRRVVVVAAAADDEEGGGG	FFLLSSSSYY??CC?WLLLLPPPPHHQQRRRRIIIMTTTTNNKKSSRKVVVVAAAADDEEGGGG	1	AGG	R	K	794	489585	No	tRNA(CCU) appears to be arginine-type due to A20				0.59
GCA_011054885.1-AGG	133453	B	GCA_011054885.1	Caldilinea aerophila	FALSE	FFLLSSSSYY**CC*WLLLLPPPPHHQQRRRRIIIMTTTTNNKKSSRRVVVVAAAADDEEGGGG	FFLLSSSSYY??CC?WLLLLPPPPHHQQRRRRIIIMTTTTNNKKSSRKVVVVAAAADDEEGGGG	1	AGG	R	K	844	502174	No	tRNA(CCU) appears to be arginine-type due to A20				0.59
GCA_000237145.1-AGG	134676	B	GCA_000237145.1	Actinoplanes sp. SE50/110	TRUE	FFLLSSSSYY**CC*WLLLLPPPPHHQQRRRRIIIMTTTTNNKKSSRRVVVVAAAADDEEGGGG	FFLLSSSSYY??CC?WLLLLPPPPHHQQRRRRIIIMTTTTNNKKSS?KVVVVAAAADDEEGGGG	1	AGG	R	K	652	566674	No	tRNA(CCU) appears to be arginine-type due to A20				0.71
GCA_900119315.1-AGG	134676	B	GCA_900119315.1	Actinoplanes sp. SE50/110	FALSE	FFLLSSSSYY**CC*WLLLLPPPPHHQQRRRRIIIMTTTTNNKKSSRRVVVVAAAADDEEGGGG	FFLLSSSSYY??CC?WLLLLPPPPHHQQRRRRIIIMTTTTNNKKSS?KVVVVAAAADDEEGGGG	1	AGG	R	K	650	566774	No	tRNA(CCU) appears to be arginine-type due to A20				0.71
GCA_000215105.1-AGG	139208	B	GCA_000215105.1	Isoptericola variabilis 225	TRUE	FFLLSSSSYY**CC*WLLLLPPPPHHQQRRRRIIIMTTTTNNKKSSRRVVVVAAAADDEEGGGG	FF?LSSSSYY??CC?WLLLLPPPPHHQQRRRRII?MTTTTNNKKSS?KVVVVAAAADDEEGGGG	1	AGG	R	K	206	280896	No	tRNA(CCU) appears to be arginine-type due to A20				0.74
GCA_001750215.1-AGG	139208	B	GCA_001750215.1	Isoptericola variabilis	FALSE	FFLLSSSSYY**CC*WLLLLPPPPHHQQRRRRIIIMTTTTNNKKSSRRVVVVAAAADDEEGGGG	FF?LSSSSYY??CC?WLLLLPPPPHHQQRRRRII?MTTTTNNKKSS?KVV?VAAAADDEEGGGG	1	AGG	R	K	261	341591	No	tRNA(CCU) appears to be arginine-type due to A20				0.75
GCA_007829755.1-AGG	139208	B	GCA_007829755.1	Isoptericola variabilis J7	FALSE	FFLLSSSSYY**CC*WLLLLPPPPHHQQRRRRIIIMTTTTNNKKSSRRVVVVAAAADDEEGGGG	FF?LSSSSYY??CC?WLLLLPPPPHHQQRRRRII?MTTTTNNKKSS?KVVVVAAAADDEEGGGG	1	AGG	R	K	203	280831	No	tRNA(CCU) appears to be arginine-type due to A20				0.74
GCA_004346265.1-AGG	141949	B	GCA_004346265.1	Thermomonas haemolytica	TRUE	FFLLSSSSYY**CC*WLLLLPPPPHHQQRRRRIIIMTTTTNNKKSSRRVVVVAAAADDEEGGGG	FFLLSSSSYY??CC?WLLLLPPPPHHQQRRRRII?MTTTTNNKKSS?KVVVVAAAADDEEGGGG	1	AGG	R	K	180	282105	No	tRNA(CCU) appears to be arginine-type due to A20				0.7
GCA_003350065.1-AGG	141949	B	GCA_003350065.1	Thermomonas haemolytica	FALSE	FFLLSSSSYY**CC*WLLLLPPPPHHQQRRRRIIIMTTTTNNKKSSRRVVVVAAAADDEEGGGG	FFLLSSSSYY??CC?WLLLLPPPPHHQQRRRRII?MTTTTNNKKSS?KVVVVAAAADDEEGGGG	1	AGG	R	K	181	283033	No	tRNA(CCU) appears to be arginine-type due to A20				0.7
GCA_000011345.1-AGG	146786	B	GCA_000011345.1	Thermosynechococcus elongatus BP-1	TRUE	FFLLSSSSYY**CC*WLLLLPPPPHHQQRRRRIIIMTTTTNNKKSSRRVVVVAAAADDEEGGGG	FFLLSSSSYY??CC?WLLLLPPPPHHQQRRRRIIIMTTTTNNKKSSRKVVVVAAAADDEEGGGG	1	AGG	R	K	449	318508	No	tRNA(CCU) appears to be arginine-type due to A20				0.54
GCA_000633145.1-AGG	148446	B	GCA_000633145.1	Burkholderia sp. A1	TRUE	FFLLSSSSYY**CC*WLLLLPPPPHHQQRRRRIIIMTTTTNNKKSSRRVVVVAAAADDEEGGGG	FFLLSSSSYY??CC?WLLLLPPPPHHQQRRRRIIIMTTTTNNKKSSRKVVVVAAAADDEEGGGG	1	AGG	R	K	825	769270	No	tRNA(CCU) appears to be arginine-type due to A20				0.69
GCA_000745855.1-AGG	151755	B	GCA_000745855.1	Xenophilus azovorans DSM 13620	TRUE	FFLLSSSSYY**CC*WLLLLPPPPHHQQRRRRIIIMTTTTNNKKSSRRVVVVAAAADDEEGGGG	FFLLSSSSYY??CC?WLLLLPPPPHHQQRRRRIIIMTTTTNNKKSSRKVVVVAAAADDEEGGGG	1	AGG	R	K	1094	625802	No	tRNA(CCU) appears to be arginine-type due to A20				0.7
GCA_900549295.1-AGG	151985	B	GCA_900549295.1	uncultured Rhodocyclaceae bacterium	FALSE	FFLLSSSSYY**CC*WLLLLPPPPHHQQRRRRIIIMTTTTNNKKSSRRVVVVAAAADDEEGGGG	FFLLSSSSYY??CC?WLLLLPPPPHHQQRRRRIIIMTTTTNNKKSSRKVVVVAAAADDEEGGGG	1	AGG	R	K	414	380870	No	No tRNA(CCU), Arg-type tRNA(UCU)				0.63
GCA_003148905.1-AGG	155197	B	GCA_003148905.1	Fulvimonas soli	TRUE	FFLLSSSSYY**CC*WLLLLPPPPHHQQRRRRIIIMTTTTNNKKSSRRVVVVAAAADDEEGGGG	FF?LSSSSYY??CC?WLLLLPPPPHHQQRRRRIIIMTTTTNNKKSS?KVVVVAAAADDEEGGGG	1	AGG	R	K	779	340381	No	tRNA(CCU) appears to be arginine-type due to A20				0.72
GCA_006352285.1-AGG	155197	B	GCA_006352285.1	Fulvimonas soli	FALSE	FFLLSSSSYY**CC*WLLLLPPPPHHQQRRRRIIIMTTTTNNKKSSRRVVVVAAAADDEEGGGG	FFLLSSSSYY??CC?WLLLLPPPPHHQQRRRRIIIMTTTTNNKKSS?KVVVVAAAADDEEGGGG	1	AGG	R	K	852	370658	No	tRNA(CCU) appears to be arginine-type due to A20				0.72
GCA_001586935.1-AGG	157592	B	GCA_001586935.1	Sterolibacterium denitrificans	TRUE	FFLLSSSSYY**CC*WLLLLPPPPHHQQRRRRIIIMTTTTNNKKSSRRVVVVAAAADDEEGGGG	FFLLSSSSYY??CC?WLLLLPPPPHHQQRRRRIIIMTTTTNNKKSS?KVVVVAAAADDEEGGGG	1	AGG	R	K	219	108783	No	No tRNA(CCU), Arg-type tRNA(UCU)				0.64
GCA_900174485.1-AGG	157592	B	GCA_900174485.1	Sterolibacterium denitrificans	FALSE	FFLLSSSSYY**CC*WLLLLPPPPHHQQRRRRIIIMTTTTNNKKSSRRVVVVAAAADDEEGGGG	FFLLSSSSYY??CC?WLLLLPPPPHHQQRRRRIIIMTTTTNNKKSSRKVVVVAAAADDEEGGGG	1	AGG	R	K	714	342078	No	tRNA(CCU) appears to be arginine-type due to A20				0.63
GCA_000364625.1-AGG	157784	B	GCA_000364625.1	Pseudomonas thermotolerans DSM 14292	TRUE	FFLLSSSSYY**CC*WLLLLPPPPHHQQRRRRIIIMTTTTNNKKSSRRVVVVAAAADDEEGGGG	FFLLSSSSYY??CC?WLLLLPPPPHHQQRRRRIIIMTTTTNNKKSSRKVVVVAAAADDEEGGGG	1	AGG	R	K	730	460872	No	tRNA(CCU) appears to be arginine-type due to A20				0.67
GCA_000513835.1-AGG	157784	B	GCA_000513835.1	Pseudomonas thermotolerans J53	FALSE	FFLLSSSSYY**CC*WLLLLPPPPHHQQRRRRIIIMTTTTNNKKSSRRVVVVAAAADDEEGGGG	FFLLSSSSYY??CC?WLLLLPPPPHHQQRRRRIIIMTTTTNNKKSSRKVVVVAAAADDEEGGGG	1	AGG	R	K	725	471934	No	tRNA(CCU) appears to be arginine-type due to A20				0.67
GCA_000022145.1-AGG	161493	B	GCA_000022145.1	Anaeromyxobacter dehalogenans 2CP-1	TRUE	FFLLSSSSYY**CC*WLLLLPPPPHHQQRRRRIIIMTTTTNNKKSSRRVVVVAAAADDEEGGGG	FF?LSSSSYY??CC?WLLLLPPPPHHQQRRRRIIIMTTTTNNKK?S?KVVVVAAAADDEEGGGG	1	AGG	R	K	372	376053	No	tRNA(CCU) appears to be arginine-type due to A20				0.75
GCA_000310185.1-AGG	164330	B	GCA_000310185.1	Thauera aminoaromatica S2	TRUE	FFLLSSSSYY**CC*WLLLLPPPPHHQQRRRRIIIMTTTTNNKKSSRRVVVVAAAADDEEGGGG	FFLLSSSSYY??CC?WLLLLPPPPHHQQRRRRIIIMTTTTNNKKSSRKVVVVAAAADDEEGGGG	1	AGG	R	K	637	484922	No	tRNA(CCU) appears to be arginine-type due to A20				0.69
GCA_900249715.1-AGG	164546	B	GCA_900249715.1	Cupriavidus taiwanensis	FALSE	FFLLSSSSYY**CC*WLLLLPPPPHHQQRRRRIIIMTTTTNNKKSSRRVVVVAAAADDEEGGGG	FFLLSSSSYY??CC?WLLLLPPPPHHQQRRRRIIIMTTTTNNKKSSRKVVVVAAAADDEEGGGG	1	AGG	R	K	1086	659816	No	tRNA(CCU) appears to be arginine-type due to A20				0.67
GCA_900249755.1-AGG	164546	B	GCA_900249755.1	Cupriavidus taiwanensis	FALSE	FFLLSSSSYY**CC*WLLLLPPPPHHQQRRRRIIIMTTTTNNKKSSRRVVVVAAAADDEEGGGG	FFLLSSSSYY??CC?WLLLLPPPPHHQQRRRRIIIMTTTTNNKKSSRKVVVVAAAADDEEGGGG	1	AGG	R	K	900	620796	No	tRNA(CCU) appears to be arginine-type due to A20				0.68
GCA_900249765.1-AGG	164546	B	GCA_900249765.1	Cupriavidus taiwanensis	FALSE	FFLLSSSSYY**CC*WLLLLPPPPHHQQRRRRIIIMTTTTNNKKSSRRVVVVAAAADDEEGGGG	FFLLSSSSYY??CC?WLLLLPPPPHHQQRRRRIIIMTTTTNNKKSSRKVVVVAAAADDEEGGGG	1	AGG	R	K	1095	659670	No	tRNA(CCU) appears to be arginine-type due to A20				0.67
GCA_900249785.1-AGG	164546	B	GCA_900249785.1	Cupriavidus taiwanensis	FALSE	FFLLSSSSYY**CC*WLLLLPPPPHHQQRRRRIIIMTTTTNNKKSSRRVVVVAAAADDEEGGGG	FFLLSSSSYY??CC?WLLLLPPPPHHQQRRRRIIIMTTTTNNKKSSRKVVVVAAAADDEEGGGG	1	AGG	R	K	1113	663055	No	tRNA(CCU) appears to be arginine-type due to A20				0.67
GCA_900249865.1-AGG	164546	B	GCA_900249865.1	Cupriavidus taiwanensis	FALSE	FFLLSSSSYY**CC*WLLLLPPPPHHQQRRRRIIIMTTTTNNKKSSRRVVVVAAAADDEEGGGG	FFLLSSSSYY??CC?WLLLLPPPPHHQQRRRRIIIMTTTTNNKKSSRKVVVVAAAADDEEGGGG	1	AGG	R	K	1139	666478	No	tRNA(CCU) appears to be arginine-type due to A20				0.67
GCA_900249875.1-AGG	164546	B	GCA_900249875.1	Cupriavidus taiwanensis	FALSE	FFLLSSSSYY**CC*WLLLLPPPPHHQQRRRRIIIMTTTTNNKKSSRRVVVVAAAADDEEGGGG	FFLLSSSSYY??CC?WLLLLPPPPHHQQRRRRIIIMTTTTNNKKSSRKVVVVAAAADDEEGGGG	1	AGG	R	K	1165	667850	No	tRNA(CCU) appears to be arginine-type due to A20				0.67
GCA_900249885.1-AGG	164546	B	GCA_900249885.1	Cupriavidus taiwanensis	FALSE	FFLLSSSSYY**CC*WLLLLPPPPHHQQRRRRIIIMTTTTNNKKSSRRVVVVAAAADDEEGGGG	FFLLSSSSYY??CC?WLLLLPPPPHHQQRRRRIIIMTTTTNNKKSSRKVVVVAAAADDEEGGGG	1	AGG	R	K	1106	661908	No	tRNA(CCU) appears to be arginine-type due to A20				0.67
GCA_900249935.1-AGG	164546	B	GCA_900249935.1	Cupriavidus taiwanensis	FALSE	FFLLSSSSYY**CC*WLLLLPPPPHHQQRRRRIIIMTTTTNNKKSSRRVVVVAAAADDEEGGGG	FFLLSSSSYY??CC?WLLLLPPPPHHQQRRRRIIIMTTTTNNKKSSRKVVVVAAAADDEEGGGG	1	AGG	R	K	1094	656163	No	tRNA(CCU) appears to be arginine-type due to A20				0.67
GCA_900249945.1-AGG	164546	B	GCA_900249945.1	Cupriavidus taiwanensis	FALSE	FFLLSSSSYY**CC*WLLLLPPPPHHQQRRRRIIIMTTTTNNKKSSRRVVVVAAAADDEEGGGG	FFLLSSSSYY??CC?WLLLLPPPPHHQQRRRRIIIMTTTTNNKKSSRKVVVVAAAADDEEGGGG	1	AGG	R	K	1096	657982	No	tRNA(CCU) appears to be arginine-type due to A20				0.67
GCA_900249955.1-AGG	164546	B	GCA_900249955.1	Cupriavidus taiwanensis	FALSE	FFLLSSSSYY**CC*WLLLLPPPPHHQQRRRRIIIMTTTTNNKKSSRRVVVVAAAADDEEGGGG	FFLLSSSSYY??CC?WLLLLPPPPHHQQRRRRIIIMTTTTNNKKSSRKVVVVAAAADDEEGGGG	1	AGG	R	K	1106	659447	No	tRNA(CCU) appears to be arginine-type due to A20				0.67
GCA_900249985.1-AGG	164546	B	GCA_900249985.1	Cupriavidus taiwanensis	FALSE	FFLLSSSSYY**CC*WLLLLPPPPHHQQRRRRIIIMTTTTNNKKSSRRVVVVAAAADDEEGGGG	FFLLSSSSYY??CC?WLLLLPPPPHHQQRRRRIIIMTTTTNNKKSSRKVVVVAAAADDEEGGGG	1	AGG	R	K	1111	667950	No	tRNA(CCU) appears to be arginine-type due to A20				0.67
GCA_900249995.1-AGG	164546	B	GCA_900249995.1	Cupriavidus taiwanensis	FALSE	FFLLSSSSYY**CC*WLLLLPPPPHHQQRRRRIIIMTTTTNNKKSSRRVVVVAAAADDEEGGGG	FFLLSSSSYY??CC?WLLLLPPPPHHQQRRRRIIIMTTTTNNKKSSRKVVVVAAAADDEEGGGG	1	AGG	R	K	1092	659217	No	tRNA(CCU) appears to be arginine-type due to A20				0.67
GCA_900250045.1-AGG	164546	B	GCA_900250045.1	Cupriavidus taiwanensis	FALSE	FFLLSSSSYY**CC*WLLLLPPPPHHQQRRRRIIIMTTTTNNKKSSRRVVVVAAAADDEEGGGG	FFLLSSSSYY??CC?WLLLLPPPPHHQQRRRRIIIMTTTTNNKKSSRKVVVVAAAADDEEGGGG	1	AGG	R	K	1154	665174	No	tRNA(CCU) appears to be arginine-type due to A20				0.67
GCA_900250055.1-AGG	164546	B	GCA_900250055.1	Cupriavidus taiwanensis	FALSE	FFLLSSSSYY**CC*WLLLLPPPPHHQQRRRRIIIMTTTTNNKKSSRRVVVVAAAADDEEGGGG	FFLLSSSSYY??CC?WLLLLPPPPHHQQRRRRIIIMTTTTNNKKSSRKVVVVAAAADDEEGGGG	1	AGG	R	K	1196	733473	No	tRNA(CCU) appears to be arginine-type due to A20				0.67
GCA_900250065.1-AGG	164546	B	GCA_900250065.1	Cupriavidus taiwanensis	FALSE	FFLLSSSSYY**CC*WLLLLPPPPHHQQRRRRIIIMTTTTNNKKSSRRVVVVAAAADDEEGGGG	FFLLSSSSYY??CC?WLLLLPPPPHHQQRRRRIIIMTTTTNNKKSSRKVVVVAAAADDEEGGGG	1	AGG	R	K	1349	738138	No	tRNA(CCU) appears to be arginine-type due to A20				0.67
GCA_900250115.1-AGG	164546	B	GCA_900250115.1	Cupriavidus taiwanensis	FALSE	FFLLSSSSYY**CC*WLLLLPPPPHHQQRRRRIIIMTTTTNNKKSSRRVVVVAAAADDEEGGGG	FFLLSSSSYY??CC?WLLLLPPPPHHQQRRRRIIIMTTTTNNKKSSRKVVVVAAAADDEEGGGG	1	AGG	R	K	1119	669133	No	tRNA(CCU) appears to be arginine-type due to A20				0.67
GCA_900250125.1-AGG	164546	B	GCA_900250125.1	Cupriavidus taiwanensis	FALSE	FFLLSSSSYY**CC*WLLLLPPPPHHQQRRRRIIIMTTTTNNKKSSRRVVVVAAAADDEEGGGG	FFLLSSSSYY??CC?WLLLLPPPPHHQQRRRRIIIMTTTTNNKKSSRKVVVVAAAADDEEGGGG	1	AGG	R	K	1171	678783	No	tRNA(CCU) appears to be arginine-type due to A20				0.67
GCA_900543335.1-AGG	165186	B	GCA_900543335.1	uncultured Ruminococcus sp.	FALSE	FFLLSSSSYY**CC*WLLLLPPPPHHQQRRRRIIIMTTTTNNKKSSRRVVVVAAAADDEEGGGG	FFLLSSSSYY??CC?WLLLLPPPPHHQQRRRRIIIMTTTTNNKKSSRKVVVVAAAADDEEGGGG	1	AGG	R	K	243	239645	No	tRNA(CCU) appears to be arginine-type due to A20				0.53
GCA_902783465.1-AGG	165186	B	GCA_902783465.1	uncultured Ruminococcus sp.	FALSE	FFLLSSSSYY**CC*WLLLLPPPPHHQQRRRRIIIMTTTTNNKKSSRRVVVVAAAADDEEGGGG	FF?LSSSSYY??CC?WLLLLPPPPHHQQRRRRIIIMTTTTNNKKSSRKVVVVAAAADDEEGGGG	1	AGG	R	K	192	192331	No	tRNA(CCU) appears to be arginine-type due to A20				0.64
GCA_900078405.1-AGG	165438	B	GCA_900078405.1	uncultured Stenotrophomonas sp.	TRUE	FFLLSSSSYY**CC*WLLLLPPPPHHQQRRRRIIIMTTTTNNKKSSRRVVVVAAAADDEEGGGG	FFLLSSSSYY??CC?WLLLLPPPPHHQQRRRRIIIMTTTTNNKKSSRKVVVVAAAADDEEGGGG	1	AGG	R	K	444	361711	No	tRNA(CCU) appears to be arginine-type due to A20				0.68
GCA_902406005.1-AGG	167968	B	GCA_902406005.1	uncultured Desulfovibrio sp.	FALSE	FFLLSSSSYY**CC*WLLLLPPPPHHQQRRRRIIIMTTTTNNKKSSRRVVVVAAAADDEEGGGG	FF?LSSSSYY??CC?WLLLLPPPPHHQQRRRRIIIMTTTTNNKKSSRKVVVVAAAADDEEGGGG	1	AGG	R	K	762	250280	No	tRNA(CCU) appears to be arginine-type due to A20				0.65
GCA_003251205.1-AGG	170623	B	GCA_003251205.1	Azotobacter beijerinckii	FALSE	FFLLSSSSYY**CC*WLLLLPPPPHHQQRRRRIIIMTTTTNNKKSSRRVVVVAAAADDEEGGGG	FFLLSSSSYY??CC?WLLLLPPPPHHQQRRRRIIIMTTTTNNKKSSRKVVVVAAAADDEEGGGG	1	AGG	R	K	338	165648	No	tRNA(CCU) appears to be arginine-type due to A20				0.63
GCA_900112015.1-AGG	170623	B	GCA_900112015.1	Azotobacter beijerinckii	FALSE	FFLLSSSSYY**CC*WLLLLPPPPHHQQRRRRIIIMTTTTNNKKSSRRVVVVAAAADDEEGGGG	FFLLSSSSYY??CC?WLLLLPPPPHHQQRRRRIIIMTTTTNNKKSSRKVVVVAAAADDEEGGGG	1	AGG	R	K	892	542762	No	tRNA(CCU) appears to be arginine-type due to A20				0.66
GCA_900114395.1-AGG	170623	B	GCA_900114395.1	Azotobacter beijerinckii	FALSE	FFLLSSSSYY**CC*WLLLLPPPPHHQQRRRRIIIMTTTTNNKKSSRRVVVVAAAADDEEGGGG	FFLLSSSSYY??CC?WLLLLPPPPHHQQRRRRIIIMTTTTNNKKSSRKVVVVAAAADDEEGGGG	1	AGG	R	K	921	545348	No	tRNA(CCU) appears to be arginine-type due to A20				0.66
GCA_009938015.1-AGG	171865	B	GCA_009938015.1	Sulfuriferula plumbiphila	TRUE	FFLLSSSSYY**CC*WLLLLPPPPHHQQRRRRIIIMTTTTNNKKSSRRVVVVAAAADDEEGGGG	FFLLSSSSYY??CC?WLLLLPPPPHHQQRRRRIIIMTTTTNNKKSSRKVVVVAAAADDEEGGGG	1	AGG	R	K	1045	407516	No	tRNA(CCU) appears to be arginine-type due to A20				0.59
GCA_007992375.1-AGG	171865	B	GCA_007992375.1	Sulfuriferula plumbiphila	FALSE	FFLLSSSSYY**CC*WLLLLPPPPHHQQRRRRIIIMTTTTNNKKSSRRVVVVAAAADDEEGGGG	FFLLSSSSYY??CC?WLLLLPPPPHHQQRRRRIIIMTTTTNNKKSSRKVVVVAAAADDEEGGGG	1	AGG	R	K	1026	400105	No	tRNA(CCU) appears to be arginine-type due to A20				0.59
GCA_900317525.1-AGG	172733	B	GCA_900317525.1	uncultured Clostridiales bacterium	FALSE	FFLLSSSSYY**CC*WLLLLPPPPHHQQRRRRIIIMTTTTNNKKSSRRVVVVAAAADDEEGGGG	FFLLSSSSYY??CC?WLLLLPPPPHHQQRRRRIIIMTTTTNNKKSSRKVVVVAAAADDEEGGGG	1	AGG	R	K	373	201306	No	tRNA(CCU) appears to be arginine-type due to A20				0.62
GCA_900317855.1-AGG	172733	B	GCA_900317855.1	uncultured Clostridiales bacterium	FALSE	FFLLSSSSYY**CC*WLLLLPPPPHHQQRRRRIIIMTTTTNNKKSSRRVVVVAAAADDEEGGGG	FFLLSSSSYY??CC?WLLLLPPPPHHQQRRRRIIIMTTTTNNKKSSRKVVVVAAAADDEEGGGG	1	AGG	R	K	127	208488	No	tRNA(CCU) appears to be arginine-type due to A20				0.62
GCA_900318965.1-AGG	172733	B	GCA_900318965.1	uncultured Clostridiales bacterium	FALSE	FFLLSSSSYY**CC*WLLLLPPPPHHQQRRRRIIIMTTTTNNKKSSRRVVVVAAAADDEEGGGG	FFLLSSSSYY??CC?WLLLLPPPPHHQQRRRRIIIMTTTTNNKKSSRKVVVVAAAADDEEGGGG	1	AGG	R	K	330	197460	No	No tRNA(CCU), Arg-type tRNA(UCU)				0.62
GCA_900319015.1-AGG	172733	B	GCA_900319015.1	uncultured Clostridiales bacterium	FALSE	FFLLSSSSYY**CC*WLLLLPPPPHHQQRRRRIIIMTTTTNNKKSSRRVVVVAAAADDEEGGGG	FFLLSSSSYY??CC?WLLLLPPPPHHQQRRRRIIIMTTTTNNKKSSRKVVVVAAAADDEEGGGG	1	AGG	R	K	335	192936	No	No tRNA(CCU), Arg-type tRNA(UCU)				0.62
GCA_900541615.1-AGG	172733	B	GCA_900541615.1	uncultured Clostridiales bacterium	FALSE	FFLLSSSSYY**CC*WLLLLPPPPHHQQRRRRIIIMTTTTNNKKSSRRVVVVAAAADDEEGGGG	FFLLSSSSYY??CC?WLLLLPPPPHHQQRRRRIIIMTTTTNNKKSSRKVVVVAAAADDEEGGGG	1	AGG	R	K	400	205651	No	tRNA(CCU) appears to be arginine-type due to A20				0.61
GCA_900543135.1-AGG	172733	B	GCA_900543135.1	uncultured Clostridiales bacterium	FALSE	FFLLSSSSYY**CC*WLLLLPPPPHHQQRRRRIIIMTTTTNNKKSSRRVVVVAAAADDEEGGGG	FFLLSSSSYY??CC?WLLLLPPPPHHQQRRRRIIIMTTTTNNKKSSRKVVVVAAAADDEEGGGG	1	AGG	R	K	135	206538	No	tRNA(CCU) appears to be arginine-type due to A20				0.62
GCA_900546415.1-AGG	172733	B	GCA_900546415.1	uncultured Clostridiales bacterium	FALSE	FFLLSSSSYY**CC*WLLLLPPPPHHQQRRRRIIIMTTTTNNKKSSRRVVVVAAAADDEEGGGG	FFLLSSSSYY??CC?WLLLLPPPPHHQQRRRRIIIMTTTTNNKKSSRKVVVVAAAADDEEGGGG	1	AGG	R	K	307	189887	No	tRNA(CCU) appears to be arginine-type due to A20				0.6
GCA_900547745.1-AGG	172733	B	GCA_900547745.1	uncultured Clostridiales bacterium	FALSE	FFLLSSSSYY**CC*WLLLLPPPPHHQQRRRRIIIMTTTTNNKKSSRRVVVVAAAADDEEGGGG	FFLLSSSSYY??CC?WLLLLPPPPHHQQRRRRIIIMTTTTNNKKSSRKVVVVAAAADDEEGGGG	1	AGG	R	K	371	196129	No	tRNA(CCU) appears to be arginine-type due to A20				0.62
GCA_900548615.1-AGG	172733	B	GCA_900548615.1	uncultured Clostridiales bacterium	FALSE	FFLLSSSSYY**CC*WLLLLPPPPHHQQRRRRIIIMTTTTNNKKSSRRVVVVAAAADDEEGGGG	FFLLSSSSYY??CC?WLLLLPPPPHHQQRRRRIIIMTTTTNNKKSSRKVVVVAAAADDEEGGGG	1	AGG	R	K	211	216974	Missing	No tRNA(CCU) or tRNA(UCU)				0.6
GCA_900548795.1-AGG	172733	B	GCA_900548795.1	uncultured Clostridiales bacterium	FALSE	FFLLSSSSYY**CC*WLLLLPPPPHHQQRRRRIIIMTTTTNNKKSSRRVVVVAAAADDEEGGGG	FFLLSSSSYY??CC?WLLLLPPPPHHQQRRRRIIIMTTTTNNKKSSRKVVVVAAAADDEEGGGG	1	AGG	R	K	243	186061	No	tRNA(CCU) appears to be arginine-type due to A20				0.61
GCA_900552375.1-AGG	172733	B	GCA_900552375.1	uncultured Clostridiales bacterium	FALSE	FFLLSSSSYY**CC*WLLLLPPPPHHQQRRRRIIIMTTTTNNKKSSRRVVVVAAAADDEEGGGG	FFLLSSSSYY??CC?WLLLLPPPPHHQQRRRRIIIMTTTTNNKKSSRKVVVVAAAADDEEGGGG	1	AGG	R	K	399	195487	No	tRNA(CCU) appears to be arginine-type due to A20				0.6
GCA_900552475.1-AGG	172733	B	GCA_900552475.1	uncultured Clostridiales bacterium	FALSE	FFLLSSSSYY**CC*WLLLLPPPPHHQQRRRRIIIMTTTTNNKKSSRRVVVVAAAADDEEGGGG	FFLLSSSSYY??CC?WLLLLPPPPHHQQRRRRIIIMTTTTNNKKSSRKVVVVAAAADDEEGGGG	1	AGG	R	K	196	224958	No	No tRNA(CCU), Arg-type tRNA(UCU)				0.62
GCA_900552725.1-AGG	172733	B	GCA_900552725.1	uncultured Clostridiales bacterium	FALSE	FFLLSSSSYY**CC*WLLLLPPPPHHQQRRRRIIIMTTTTNNKKSSRRVVVVAAAADDEEGGGG	FFLLSSSSYY??CC?WLLLLPPPPHHQQRRRRIIIMTTTTNNKKSSRKVVVVAAAADDEEGGGG	1	AGG	R	K	251	221340	Missing	No tRNA(CCU) or tRNA(UCU)				0.61
GCA_900553265.1-AGG	172733	B	GCA_900553265.1	uncultured Clostridiales bacterium	FALSE	FFLLSSSSYY**CC*WLLLLPPPPHHQQRRRRIIIMTTTTNNKKSSRRVVVVAAAADDEEGGGG	FFLLSSSSYY??CC?WLLLLPPPPHHQQRRRRIIIMTTTTNNKKSSRKVVVVAAAADDEEGGGG	1	AGG	R	K	745	269965	No	tRNA(CCU) appears to be arginine-type due to A20				0.63
GCA_900554855.1-AGG	172733	B	GCA_900554855.1	uncultured Clostridiales bacterium	FALSE	FFLLSSSSYY**CC*WLLLLPPPPHHQQRRRRIIIMTTTTNNKKSSRRVVVVAAAADDEEGGGG	FFLLSSSSYY??CC?WLLLLPPPPHHQQRRRRIIIMTTTTNNKKSSRKVVVVAAAADDEEGGGG	1	AGG	R	K	237	193607	No	tRNA(CCU) appears to be arginine-type due to A20				0.59
GCA_900557095.1-AGG	172733	B	GCA_900557095.1	uncultured Clostridiales bacterium	FALSE	FFLLSSSSYY**CC*WLLLLPPPPHHQQRRRRIIIMTTTTNNKKSSRRVVVVAAAADDEEGGGG	FFLLSSSSYY??CC?WLLLLPPPPHHQQRRRRIIIMTTTTNNKKSSRKVVVVAAAADDEEGGGG	1	AGG	R	K	123	164332	Missing	No tRNA(CCU) or tRNA(UCU)				0.62
GCA_003096415.1-AGG	172901	B	GCA_003096415.1	Victivallis vadensis	TRUE	FFLLSSSSYY**CC*WLLLLPPPPHHQQRRRRIIIMTTTTNNKKSSRRVVVVAAAADDEEGGGG	FFLLSSSSYY??CC?WLLLLPPPPHHQQRRRRIIIMTTTTNNKKSS?KVVVVAAAADDEEGGGG	1	AGG	R	K	679	311793	No	tRNA(CCU) appears to be arginine-type due to A20				0.6
GCA_012843305.1-AGG	172901	B	GCA_012843305.1	Victivallis vadensis	FALSE	FFLLSSSSYY**CC*WLLLLPPPPHHQQRRRRIIIMTTTTNNKKSSRRVVVVAAAADDEEGGGG	FFLLSSSSYY??CC?WLLLLPPPPHHQQRRRRIIIMTTTTNNKKSSRKVVVVAAAADDEEGGGG	1	AGG	R	K	736	327239	No	tRNA(CCU) appears to be arginine-type due to A20				0.59
GCA_902387455.1-AGG	172901	B	GCA_902387455.1	Victivallis vadensis	FALSE	FFLLSSSSYY**CC*WLLLLPPPPHHQQRRRRIIIMTTTTNNKKSSRRVVVVAAAADDEEGGGG	FFLLSSSSYY??CC?WLLLLPPPPHHQQRRRRIIIMTTTTNNKKSSRKVVVVAAAADDEEGGGG	1	AGG	R	K	624	274022	No	tRNA(CCU) appears to be arginine-type due to A20				0.59
GCA_010093135.1-AGG	176598	B	GCA_010093135.1	Pseudoxanthomonas taiwanensis	TRUE	FFLLSSSSYY**CC*WLLLLPPPPHHQQRRRRIIIMTTTTNNKKSSRRVVVVAAAADDEEGGGG	FF?LSSSSYY??CC?WLLLLPPPPHHQQRRRRIIIMTTTTNNKKSSKKVVVVAAAADDEEGGGG	2	AGG	R	K	645	348509	No	tRNA(CCU) appears to be arginine-type due to A20				0.72
GCA_007994095.1-AGG	176598	B	GCA_007994095.1	Pseudoxanthomonas taiwanensis J19	FALSE	FFLLSSSSYY**CC*WLLLLPPPPHHQQRRRRIIIMTTTTNNKKSSRRVVVVAAAADDEEGGGG	FF?LSSSSYY??CC?WLLLLPPPPHHQQRRRRIIIMTTTTNNKKSS?KVVVVAAAADDEEGGGG	1	AGG	R	K	485	371851	No	tRNA(CCU) appears to be arginine-type due to A20				0.71
GCA_000204645.1-AGG	179636	B	GCA_000204645.1	Alicycliphilus denitrificans K601	TRUE	FFLLSSSSYY**CC*WLLLLPPPPHHQQRRRRIIIMTTTTNNKKSSRRVVVVAAAADDEEGGGG	FFLLSSSSYY??CC?WLLLLPPPPHHQQRRRRIIIMTTTTNNKKSSRKVVVVAAAADDEEGGGG	1	AGG	R	K	1127	517509	No	tRNA(CCU) appears to be arginine-type due to A20				0.68
GCA_000179015.2-AGG	179636	B	GCA_000179015.2	Alicycliphilus denitrificans BC	FALSE	FFLLSSSSYY**CC*WLLLLPPPPHHQQRRRRIIIMTTTTNNKKSSRRVVVVAAAADDEEGGGG	FFLLSSSSYY??CC?WLLLLPPPPHHQQRRRRIIIMTTTTNNKKSS?KVVVVAAAADDEEGGGG	1	AGG	R	K	1086	497288	No	tRNA(CCU) appears to be arginine-type due to A20				0.68
GCA_002250385.2-AGG	179636	B	GCA_002250385.2	Alicycliphilus denitrificans	FALSE	FFLLSSSSYY**CC*WLLLLPPPPHHQQRRRRIIIMTTTTNNKKSSRRVVVVAAAADDEEGGGG	FFLLSSSSYY??CC?WLLLLPPPPHHQQRRRRIIIMTTTTNNKKSSRKVVVVAAAADDEEGGGG	1	AGG	R	K	1224	500449	No	tRNA(CCU) appears to be arginine-type due to A20				0.69
GCA_002894355.1-AGG	179636	B	GCA_002894355.1	Alicycliphilus denitrificans	FALSE	FFLLSSSSYY**CC*WLLLLPPPPHHQQRRRRIIIMTTTTNNKKSSRRVVVVAAAADDEEGGGG	FFLLSSSSYY??CC?WLLLLPPPPHHQQRRRRIIIMTTTTNNKKSSRKVVVVAAAADDEEGGGG	1	AGG	R	K	1160	509893	No	tRNA(CCU) appears to be arginine-type due to A20				0.68
GCA_012530715.1-AGG	179636	B	GCA_012530715.1	Alicycliphilus denitrificans	FALSE	FFLLSSSSYY**CC*WLLLLPPPPHHQQRRRRIIIMTTTTNNKKSSRRVVVVAAAADDEEGGGG	FFLLSSSSYY??CC?WLLLLPPPPHHQQRRRRIIIMTTTTNNKKSSRKVVVVAAAADDEEGGGG	1	AGG	R	K	1132	503796	No	tRNA(CCU) appears to be arginine-type due to A20				0.68
GCA_000226955.2-AGG	179878	B	GCA_000226955.2	Sphingomonas elodea ATCC 31461	TRUE	FFLLSSSSYY**CC*WLLLLPPPPHHQQRRRRIIIMTTTTNNKKSSRRVVVVAAAADDEEGGGG	FFLLSSSSYY??CC?WLLLLPPPPHHQQRRRRIIIMTTTTNNKKSSRKVVVVAAAADDEEGGGG	1	AGG	R	K	404	412943	No	tRNA(CCU) appears to be arginine-type due to A20				0.67
GCA_001021565.1-AGG	180282	B	GCA_001021565.1	Delftia tsuruhatensis	FALSE	FFLLSSSSYY**CC*WLLLLPPPPHHQQRRRRIIIMTTTTNNKKSSRRVVVVAAAADDEEGGGG	FFLLSSSSYY??CC?WLLLLPPPPHHQQRRRRIIIMTTTTNNKKSSRKVVVVAAAADDEEGGGG	1	AGG	R	K	972	575519	No	tRNA(CCU) appears to be arginine-type due to A20				0.67
GCA_000025265.1-AGG	191495	B	GCA_000025265.1	Conexibacter woesei DSM 14684	TRUE	FFLLSSSSYY**CC*WLLLLPPPPHHQQRRRRIIIMTTTTNNKKSSRRVVVVAAAADDEEGGGG	FF?LSSSSYY??CC?WLL?LPPPPHHQQRRRRIIIMTTTTNNKKSSKKVVVVAAAADDEEGGGG	2	AGG	R	K	379	455512	Unclear	tRNA(CCU) does not have A20, has A73 discriminator. tRNA(UCU) is arginine-type, has A20				0.73
GCA_000424625.1-AGG	191495	B	GCA_000424625.1	Conexibacter woesei Iso977N	FALSE	FFLLSSSSYY**CC*WLLLLPPPPHHQQRRRRIIIMTTTTNNKKSSRRVVVVAAAADDEEGGGG	FF?LSSSSYY??CC?WLLLLPPPPHHQQRRRRII?MTTTTNNKKSSRKVVVVAAAADDEEGGGG	1	AGG	R	K	1418	391277	No	tRNA(CCU) appears to be arginine-type due to A20				0.72
GCA_000173075.1-AGG	191863	B	GCA_000173075.1	Chthoniobacter flavus Ellin428	TRUE	FFLLSSSSYY**CC*WLLLLPPPPHHQQRRRRIIIMTTTTNNKKSSRRVVVVAAAADDEEGGGG	FFLLSSSSYY??CC?WLLLLPPPPHHQQRRRRIIIMTTTTNNKKSSRKVVVVAAAADDEEGGGG	1	AGG	R	K	392	486309	No	tRNA(CCU) appears to be arginine-type due to A20				0.61
GCA_004341915.1-AGG	191863	B	GCA_004341915.1	Chthoniobacter flavus	FALSE	FFLLSSSSYY**CC*WLLLLPPPPHHQQRRRRIIIMTTTTNNKKSSRRVVVVAAAADDEEGGGG	FFLLSSSSYY??CC?WLLLLPPPPHHQQRRRRIIIMTTTTNNKKSS?KVVVVAAAADDEEGGGG	1	AGG	R	K	385	491519	No	tRNA(CCU) appears to be arginine-type due to A20				0.61
GCA_900103845.1-AGG	198616	B	GCA_900103845.1	Pseudomonas jinjuensis	TRUE	FFLLSSSSYY**CC*WLLLLPPPPHHQQRRRRIIIMTTTTNNKKSSRRVVVVAAAADDEEGGGG	FFLLSSSSYY??CC?WLLLLPPPPHHQQRRRRIIIMTTTTNNKKSSRKVVVVAAAADDEEGGGG	1	AGG	R	K	1304	665559	No	tRNA(CCU) appears to be arginine-type due to A20				0.66
GCA_002091655.1-AGG	198616	B	GCA_002091655.1	Pseudomonas jinjuensis NBRC 103047	FALSE	FFLLSSSSYY**CC*WLLLLPPPPHHQQRRRRIIIMTTTTNNKKSSRRVVVVAAAADDEEGGGG	FFLLSSSSYY??CC?WLLLLPPPPHHQQRRRRIIIMTTTTNNKKSSRKVVVVAAAADDEEGGGG	1	AGG	R	K	1296	664261	No	tRNA(CCU) appears to be arginine-type due to A20				0.66
GCA_000482785.1-AGG	203699	B	GCA_000482785.1	Derxia gummosa DSM 723	TRUE	FFLLSSSSYY**CC*WLLLLPPPPHHQQRRRRIIIMTTTTNNKKSSRRVVVVAAAADDEEGGGG	FFLLSSSSYY??CC?WLLLLPPPPHHQQRRRRIIIMTTTTNNKKSSRKVVVVAAAADDEEGGGG	1	AGG	R	K	466	435302	No	tRNA(CCU) appears to be arginine-type due to A20				0.7
GCA_008693785.1-AGG	207340	B	GCA_008693785.1	Roseomonas mucosa	TRUE	FFLLSSSSYY**CC*WLLLLPPPPHHQQRRRRIIIMTTTTNNKKSSRRVVVVAAAADDEEGGGG	FFLLSSSSYY??CC?WLLLLPPPPHHQQRRRRIIIMTTTTNNKKSSRKVVVVAAAADDEEGGGG	1	AGG	R	K	872	444254	No	tRNA(CCU) appears to be arginine-type due to A20				0.7
GCA_000622225.1-AGG	207340	B	GCA_000622225.1	Roseomonas mucosa ATCC BAA-692	FALSE	FFLLSSSSYY**CC*WLLLLPPPPHHQQRRRRIIIMTTTTNNKKSSRRVVVVAAAADDEEGGGG	FFLLSSSSYY??CC?WLLLLPPPPHHQQRRRRIIIMTTTTNNKKSSRKVVVVAAAADDEEGGGG	1	AGG	R	K	862	446773	No	tRNA(CCU) appears to be arginine-type due to A20				0.7
GCA_001466485.2-AGG	207340	B	GCA_001466485.2	Roseomonas mucosa	FALSE	FFLLSSSSYY**CC*WLLLLPPPPHHQQRRRRIIIMTTTTNNKKSSRRVVVVAAAADDEEGGGG	FFLLSSSSYY??CC?WLLLLPPPPHHQQRRRRIIIMTTTTNNKKSSRKVVVVAAAADDEEGGGG	1	AGG	R	K	893	464235	No	tRNA(CCU) appears to be arginine-type due to A20				0.7
GCA_900455935.1-AGG	207340	B	GCA_900455935.1	Roseomonas mucosa	FALSE	FFLLSSSSYY**CC*WLLLLPPPPHHQQRRRRIIIMTTTTNNKKSSRRVVVVAAAADDEEGGGG	FFLLSSSSYY??CC?WLLLLPPPPHHQQRRRRIIIMTTTTNNKKSSRKVVVVAAAADDEEGGGG	1	AGG	R	K	863	446552	No	tRNA(CCU) appears to be arginine-type due to A20				0.7
GCA_902825995.1-AGG	208544	B	GCA_902825995.1	uncultured Burkholderiales bacterium	TRUE	FFLLSSSSYY**CC*WLLLLPPPPHHQQRRRRIIIMTTTTNNKKSSRRVVVVAAAADDEEGGGG	FFLLSSSSYY??CC?WLLLLPPPPHHQQRRRRIIIMTTTTNNKKSSRKVVVVAAAADDEEGGGG	1	AGG	R	K	483	337204	No	tRNA(CCU) appears to be arginine-type due to A20				0.67
GCA_004551755.1-AGG	214851	B	GCA_004551755.1	Subdoligranulum variabile	FALSE	FFLLSSSSYY**CC*WLLLLPPPPHHQQRRRRIIIMTTTTNNKKSSRRVVVVAAAADDEEGGGG	FFLLSSSSYY??CC?WLLLLPPPPHHQQRRRRIIIMTTTTNNKKSSRKVVVVAAAADDEEGGGG	1	AGG	R	K	336	214120	No	No tRNA(CCU), Arg-type tRNA(UCU)				0.61
GCA_004342465.1-AGG	215580	B	GCA_004342465.1	Schlegelella thermodepolymerans	TRUE	FFLLSSSSYY**CC*WLLLLPPPPHHQQRRRRIIIMTTTTNNKKSSRRVVVVAAAADDEEGGGG	FF?LSSSSYY??CC?WLLLLPPPPHHQQRRRRIIIMTTTTNNKKSS?KVVVVAAAADDEEGGGG	1	AGG	R	K	354	412121	No	tRNA(CCU) appears to be arginine-type due to A20				0.7
GCA_002933415.1-AGG	215580	B	GCA_002933415.1	Schlegelella thermodepolymerans	FALSE	FFLLSSSSYY**CC*WLLLLPPPPHHQQRRRRIIIMTTTTNNKKSSRRVVVVAAAADDEEGGGG	FF?LSSSSYY??CC?WLLLLPPPPHHQQRRRRIIIMTTTTNNKKSSRKVVVVAAAADDEEGGGG	1	AGG	R	K	329	404402	No	tRNA(CCU) appears to be arginine-type due to A20				0.7
GCA_003349825.1-AGG	215580	B	GCA_003349825.1	Schlegelella thermodepolymerans	FALSE	FFLLSSSSYY**CC*WLLLLPPPPHHQQRRRRIIIMTTTTNNKKSSRRVVVVAAAADDEEGGGG	FF?LSSSSYY??CC?WLLLLPPPPHHQQRRRRIIIMTTTTNNKKSSRKVVVVAAAADDEEGGGG	1	AGG	R	K	324	401388	No	tRNA(CCU) appears to be arginine-type due to A20				0.7
GCA_000423885.1-AGG	215690	B	GCA_000423885.1	Thermomonas fusca DSM 15424	TRUE	FFLLSSSSYY**CC*WLLLLPPPPHHQQRRRRIIIMTTTTNNKKSSRRVVVVAAAADDEEGGGG	FFLLSSSSYY??CC?WLLLLPPPPHHQQRRRRIIIMTTTTNNKKSSRKVVVVAAAADDEEGGGG	1	AGG	R	K	424	339983	No	tRNA(CCU) appears to be arginine-type due to A20				0.68
GCA_005862345.1-AGG	215690	B	GCA_005862345.1	Thermomonas fusca	FALSE	FFLLSSSSYY**CC*WLLLLPPPPHHQQRRRRIIIMTTTTNNKKSSRRVVVVAAAADDEEGGGG	FFLLSSSSYY??CC?WLLLLPPPPHHQQRRRRIIIMTTTTNNKKSSRKVVVVAAAADDEEGGGG	1	AGG	R	K	373	318520	No	tRNA(CCU) appears to be arginine-type due to A20				0.68
GCA_007667275.1-AGG	216778	B	GCA_007667275.1	Stenotrophomonas rhizophila	FALSE	FFLLSSSSYY**CC*WLLLLPPPPHHQQRRRRIIIMTTTTNNKKSSRRVVVVAAAADDEEGGGG	FFLLSSSSYY??CC?WLLLLPPPPHHQQRRRRIIIMTTTTNNKKSSRKVVVVAAAADDEEGGGG	1	AGG	R	K	404	417342	No	tRNA(CCU) appears to be arginine-type due to A20				0.67
GCA_011604605.1-AGG	216778	B	GCA_011604605.1	Stenotrophomonas rhizophila	FALSE	FFLLSSSSYY**CC*WLLLLPPPPHHQQRRRRIIIMTTTTNNKKSSRRVVVVAAAADDEEGGGG	FF?LSSSSYY??CC?WLLLLPPPPHHQQRRRRIIIMTTTTNNKKSS?KVVVVAAAADDEEGGGG	1	AGG	R	K	442	434382	No	tRNA(CCU) appears to be arginine-type due to A20				0.68
GCA_006739055.1-AGG	217070	B	GCA_006739055.1	Stella vacuolata	TRUE	FFLLSSSSYY**CC*WLLLLPPPPHHQQRRRRIIIMTTTTNNKKSSRRVVVVAAAADDEEGGGG	FF?LSSSSYY??CC?WLLLLPPPPHHQQRRRRIIIMTTTTNNKKSSRKVVVVAAAADDEEGGGG	1	AGG	R	K	476	528772	No	tRNA(CCU) appears to be arginine-type due to A20				0.71
GCA_000341345.1-AGG	225326	B	GCA_000341345.1	Corynebacterium halotolerans YIM 70093 = DSM 44683	TRUE	FFLLSSSSYY**CC*WLLLLPPPPHHQQRRRRIIIMTTTTNNKKSSRRVVVVAAAADDEEGGGG	FFLLSSSSYY??CC?WLLLLPPPPHHQQRRRRIIIMTTTTNNKKSSRKVVVVAAAADDEEGGGG	1	AGG	R	K	411	272028	No	tRNA(CCU) appears to be arginine-type due to A20				0.68
GCA_000688435.1-AGG	225326	B	GCA_000688435.1	Corynebacterium halotolerans YIM 70093 = DSM 44683	FALSE	FFLLSSSSYY**CC*WLLLLPPPPHHQQRRRRIIIMTTTTNNKKSSRRVVVVAAAADDEEGGGG	FFLLSSSSYY??CC?WLLLLPPPPHHQQRRRRIIIMTTTTNNKKSSRKVVVVAAAADDEEGGGG	1	AGG	R	K	429	280138	No	tRNA(CCU) appears to be arginine-type due to A20				0.68
GCA_000620485.1-AGG	231455	B	GCA_000620485.1	Dyella japonica UNC79MFTsu3.2	FALSE	FFLLSSSSYY**CC*WLLLLPPPPHHQQRRRRIIIMTTTTNNKKSSRRVVVVAAAADDEEGGGG	FFLLSSSSYY??CC?WLLLLPPPPHHQQRRRRIIIMTTTTNNKKSSRKVVVVAAAADDEEGGGG	1	AGG	R	K	513	451982	No	tRNA(CCU) appears to be arginine-type due to A20				0.67
GCA_000378965.1-AGG	243063	B	GCA_000378965.1	Thioalkalivibrio thiocyanodenitrificans ARhD 1	TRUE	FFLLSSSSYY**CC*WLLLLPPPPHHQQRRRRIIIMTTTTNNKKSSRRVVVVAAAADDEEGGGG	FFLLSSSSYY??CC?WLLLLPPPPHHQQRRRRIIIMTTTTNNKKSSRKVVVVAAAADDEEGGGG	1	AGG	R	K	1419	376857	No	tRNA(CCU) appears to be arginine-type due to A20				0.65
GCA_000701425.1-AGG	249403	B	GCA_000701425.1	Deinococcus frigens DSM 12807	TRUE	FFLLSSSSYY**CC*WLLLLPPPPHHQQRRRRIIIMTTTTNNKKSSRRVVVVAAAADDEEGGGG	FFLLSSSSYY??CC?WLLLLPPPPHHQQRRRRIIIMTTTTNNKKSSRKVVVVAAAADDEEGGGG	1	AGG	R	K	840	357250	No	tRNA(CCU) appears to be arginine-type due to A20				0.65
GCA_000382285.1-AGG	254408	B	GCA_000382285.1	Solimonas variicoloris DSM 15731	TRUE	FFLLSSSSYY**CC*WLLLLPPPPHHQQRRRRIIIMTTTTNNKKSSRRVVVVAAAADDEEGGGG	FFLLSSSSYY??CC?WLLLLPPPPHHQQRRRRIIIMTTTTNNKKSSRKVVVVAAAADDEEGGGG	1	AGG	R	K	269	404559	No	tRNA(CCU) appears to be arginine-type due to A20				0.69
GCA_000518625.1-AGG	257708	B	GCA_000518625.1	Roseomonas gilardii subsp. rosea ATCC BAA-691	FALSE	FFLLSSSSYY**CC*WLLLLPPPPHHQQRRRRIIIMTTTTNNKKSSRRVVVVAAAADDEEGGGG	FF?LSSSSYY??CC?WLLLLPPPPHHQQRRRRIIIMTTTTNNKKSSRKVVVVAAAADDEEGGGG	1	AGG	R	K	825	432532	No	tRNA(CCU) appears to be arginine-type due to A20				0.71
GCA_900455865.1-AGG	257708	B	GCA_900455865.1	Roseomonas gilardii subsp. rosea	FALSE	FFLLSSSSYY**CC*WLLLLPPPPHHQQRRRRIIIMTTTTNNKKSSRRVVVVAAAADDEEGGGG	FF?LSSSSYY??CC?WLLLLPPPPHHQQRRRRIIIMTTTTNNKKSS?KVVVVAAAADDEEGGGG	1	AGG	R	K	667	368845	No	tRNA(CCU) appears to be arginine-type due to A20				0.71
GCA_000768345.1-AGG	262325	B	GCA_000768345.1	Lysobacter concretionis Ko07 = DSM 16239	TRUE	FFLLSSSSYY**CC*WLLLLPPPPHHQQRRRRIIIMTTTTNNKKSSRRVVVVAAAADDEEGGGG	FFLLSSSSYY??CC?WLLLLPPPPHHQQRRRRIIIMTTTTNNKKSS?KVVVVAAAADDEEGGGG	1	AGG	R	K	410	324655	No	tRNA(CCU) appears to be arginine-type due to A20				0.67
GCA_900091555.1-AGG	262898	B	GCA_900091555.1	Micromonospora mirobrigensis	TRUE	FFLLSSSSYY**CC*WLLLLPPPPHHQQRRRRIIIMTTTTNNKKSSRRVVVVAAAADDEEGGGG	FFLLSSSSYY??CC?WLLLLPPPPHHQQRRRRIIIMTTTTNNKKSSRKVVVVAAAADDEEGGGG	1	AGG	R	K	474	424539	No	tRNA(CCU) appears to be arginine-type due to A20				0.73
GCA_000429065.1-AGG	265429	B	GCA_000429065.1	Silanimonas lenta DSM 16282	TRUE	FFLLSSSSYY**CC*WLLLLPPPPHHQQRRRRIIIMTTTTNNKKSSRRVVVVAAAADDEEGGGG	FF?LSSSSYY??CC?WLLLLPPPPHHQQRRRRII?MTTTTNNKKSSKKVVVVAAAADDEEGGGG	2	AGG	R	K	488	288627	No	tRNA(CCU) appears to be arginine-type due to A20				0.71
GCA_010093225.1-AGG	266061	B	GCA_010093225.1	Pseudoxanthomonas koreensis	TRUE	FFLLSSSSYY**CC*WLLLLPPPPHHQQRRRRIIIMTTTTNNKKSSRRVVVVAAAADDEEGGGG	FF?LSSSSYY??CC?WLLLLPPPPHHQQRRRRIIIMTTTTNNKKSSRKVVVVAAAADDEEGGGG	1	AGG	R	K	521	324471	No	tRNA(CCU) appears to be arginine-type due to A20				0.7
GCA_001956775.1-AGG	267128	B	GCA_001956775.1	Sphingopyxis granuli	FALSE	FFLLSSSSYY**CC*WLLLLPPPPHHQQRRRRIIIMTTTTNNKKSSRRVVVVAAAADDEEGGGG	FFLLSSSSYY??CC?WLLLLPPPPHHQQRRRRIIIMTTTTNNKKSSRKVVVVAAAADDEEGGGG	1	AGG	R	K	362	337885	No	tRNA(CCU) appears to be arginine-type due to A20				0.68
GCA_000429225.1-AGG	272548	B	GCA_000429225.1	Actinomyces dentalis DSM 19115	TRUE	FFLLSSSSYY**CC*WLLLLPPPPHHQQRRRRIIIMTTTTNNKKSSRRVVVVAAAADDEEGGGG	FF?LSSSSYY??CC?WLLLLPPPPHHQQRRRRIIIMTTTTNNKKSSRKVVVVAAAADDEEGGGG	1	AGG	R	K	930	228922	No	tRNA(CCU) appears to be arginine-type due to A20				0.73
GCA_000243495.3-AGG	278956	B	GCA_000243495.3	Opitutaceae bacterium TAV1	TRUE	FFLLSSSSYY**CC*WLLLLPPPPHHQQRRRRIIIMTTTTNNKKSSRRVVVVAAAADDEEGGGG	FFLLSSSSYY??CC?WLLLLPPPPHHQQRRRRIIIMTTTTNNKKSSRKVVVVAAAADDEEGGGG	1	AGG	R	K	589	381490	No	tRNA(CCU) appears to be arginine-type due to A20				0.63
GCA_010211765.1-AGG	283923	B	GCA_010211765.1	Pseudoxanthomonas kaohsiungensis	TRUE	FFLLSSSSYY**CC*WLLLLPPPPHHQQRRRRIIIMTTTTNNKKSSRRVVVVAAAADDEEGGGG	FFLLSSSSYY??CC?WLLLLPPPPHHQQRRRRIIIMTTTTNNKKSS?KVVVVAAAADDEEGGGG	1	AGG	R	K	517	366954	No	tRNA(CCU) appears to be arginine-type due to A20				0.7
GCA_000425625.1-AGG	291995	B	GCA_000425625.1	Pseudomonas azotifigens DSM 17556	TRUE	FFLLSSSSYY**CC*WLLLLPPPPHHQQRRRRIIIMTTTTNNKKSSRRVVVVAAAADDEEGGGG	FFLLSSSSYY??CC?WLLLLPPPPHHQQRRRRIIIMTTTTNNKKSSRKVVVVAAAADDEEGGGG	1	AGG	R	K	1048	569655	No	tRNA(CCU) appears to be arginine-type due to A20				0.67
GCA_902826325.1-AGG	293405	B	GCA_902826325.1	uncultured Sphingomonadales bacterium	TRUE	FFLLSSSSYY**CC*WLLLLPPPPHHQQRRRRIIIMTTTTNNKKSSRRVVVVAAAADDEEGGGG	FFLLSSSSYY??CC?WLLLLPPPPHHQQRRRRIIIMTTTTNNKKSS?KVVVVAAAADDEEGGGG	1	AGG	R	K	320	287625	No	tRNA(CCU) appears to be arginine-type due to A20				0.67
GCA_902825815.1-AGG	293405	B	GCA_902825815.1	uncultured Sphingomonadales bacterium	FALSE	FFLLSSSSYY**CC*WLLLLPPPPHHQQRRRRIIIMTTTTNNKKSSRRVVVVAAAADDEEGGGG	FFLLSSSSYY??CC?WLLLLPPPPHHQQRRRRIIIMTTTTNNKKSS?KVVVVAAAADDEEGGGG	1	AGG	R	K	303	272611	No	tRNA(CCU) appears to be arginine-type due to A20				0.67
GCA_000185965.1-AGG	314722	B	GCA_000185965.1	Pseudoxanthomonas suwonensis 11-1	TRUE	FFLLSSSSYY**CC*WLLLLPPPPHHQQRRRRIIIMTTTTNNKKSSRRVVVVAAAADDEEGGGG	FF?LSSSSYY??CC?WLLLLPPPPHHQQRRRRIIIMTTTTNNKKSSRKVVVVAAAADDEEGGGG	1	AGG	R	K	555	362085	No	tRNA(CCU) appears to be arginine-type due to A20				0.7
GCA_000513955.1-AGG	314722	B	GCA_000513955.1	Pseudoxanthomonas suwonensis J47	FALSE	FFLLSSSSYY**CC*WLLLLPPPPHHQQRRRRIIIMTTTTNNKKSSRRVVVVAAAADDEEGGGG	FFLLSSSSYY??CC?WLLLLPPPPHHQQRRRRIIIMTTTTNNKKSS?KVVVVAAAADDEEGGGG	1	AGG	R	K	481	347246	No	tRNA(CCU) appears to be arginine-type due to A20				0.71
GCA_000519025.1-AGG	314722	B	GCA_000519025.1	Pseudoxanthomonas suwonensis J43	FALSE	FFLLSSSSYY**CC*WLLLLPPPPHHQQRRRRIIIMTTTTNNKKSSRRVVVVAAAADDEEGGGG	FFLLSSSSYY??CC?WLLLLPPPPHHQQRRRRIIIMTTTTNNKKSS?KVVVVAAAADDEEGGGG	1	AGG	R	K	463	346136	No	tRNA(CCU) appears to be arginine-type due to A20				0.71
GCA_000526975.1-AGG	314722	B	GCA_000526975.1	Pseudoxanthomonas suwonensis J42	FALSE	FFLLSSSSYY**CC*WLLLLPPPPHHQQRRRRIIIMTTTTNNKKSSRRVVVVAAAADDEEGGGG	FF?LSSSSYY??CC?WLLLLPPPPHHQQRRRRIIIMTTTTNNKKSS?KVVVVAAAADDEEGGGG	1	AGG	R	K	504	362323	No	tRNA(CCU) appears to be arginine-type due to A20				0.71
GCA_000972865.1-AGG	314722	B	GCA_000972865.1	Pseudoxanthomonas suwonensis	FALSE	FFLLSSSSYY**CC*WLLLLPPPPHHQQRRRRIIIMTTTTNNKKSSRRVVVVAAAADDEEGGGG	FF?LSSSSYY??CC?WLLLLPPPPHHQQRRRRIIIMTTTTNNKKSSRKVVVVAAAADDEEGGGG	1	AGG	R	K	551	365083	No	tRNA(CCU) appears to be arginine-type due to A20				0.7
GCA_010093235.1-AGG	314722	B	GCA_010093235.1	Pseudoxanthomonas suwonensis	FALSE	FFLLSSSSYY**CC*WLLLLPPPPHHQQRRRRIIIMTTTTNNKKSSRRVVVVAAAADDEEGGGG	FF?LSSSSYY??CC?WLLLLPPPPHHQQRRRRIIIMTTTTNNKKSSRKVVVVAAAADDEEGGGG	1	AGG	R	K	709	359225	No	tRNA(CCU) appears to be arginine-type due to A20				0.7
GCA_009727155.1-AGG	321982	B	GCA_009727155.1	Massilia dura	TRUE	FFLLSSSSYY**CC*WLLLLPPPPHHQQRRRRIIIMTTTTNNKKSSRRVVVVAAAADDEEGGGG	FFLLSSSSYY??CC?WLLLLPPPPHHQQRRRRIIIMTTTTNNKKSSRKVVVVAAAADDEEGGGG	1	AGG	R	K	1271	665656	No	tRNA(CCU) appears to be arginine-type due to A20				0.66
GCA_002345025.1-AGG	327160	B	GCA_002345025.1	Candidatus Accumulibacter phosphatis	FALSE	FFLLSSSSYY**CC*WLLLLPPPPHHQQRRRRIIIMTTTTNNKKSSRRVVVVAAAADDEEGGGG	FFLLSSSSYY??CC?WLLLLPPPPHHQQRRRRIIIMTTTTNNKKSSRKVVVVAAAADDEEGGGG	1	AGG	R	K	1470	446592	No	tRNA(CCU) appears to be arginine-type due to A20				0.66
GCA_002345285.1-AGG	327160	B	GCA_002345285.1	Candidatus Accumulibacter phosphatis	FALSE	FFLLSSSSYY**CC*WLLLLPPPPHHQQRRRRIIIMTTTTNNKKSSRRVVVVAAAADDEEGGGG	FFLLSSSSYY??CC?WLLLLPPPPHHQQRRRRIIIMTTTTNNKKSSRKVVVVAAAADDEEGGGG	1	AGG	R	K	1327	444310	No	tRNA(CCU) appears to be arginine-type due to A20				0.66
GCA_012940005.1-AGG	327160	B	GCA_012940005.1	Candidatus Accumulibacter phosphatis	FALSE	FFLLSSSSYY**CC*WLLLLPPPPHHQQRRRRIIIMTTTTNNKKSSRRVVVVAAAADDEEGGGG	FFLLSSSSYY??CC?WLLLLPPPPHHQQRRRRIIIMTTTTNNKKSSRKVVVVAAAADDEEGGGG	1	AGG	R	K	1577	493190	No	tRNA(CCU) appears to be arginine-type due to A20				0.62
GCA_004342425.1-AGG	328517	B	GCA_004342425.1	Dokdonella fugitiva	TRUE	FFLLSSSSYY**CC*WLLLLPPPPHHQQRRRRIIIMTTTTNNKKSSRRVVVVAAAADDEEGGGG	FFLLSSSSYY??CC?WLLLLPPPPHHQQRRRRIIIMTTTTNNKKSS?KVVVVAAAADDEEGGGG	1	AGG	R	K	420	342518	No	tRNA(CCU) appears to be arginine-type due to A20				0.69
GCA_001431405.1-AGG	344882	B	GCA_001431405.1	Pseudoxanthomonas dokdonensis	TRUE	FFLLSSSSYY**CC*WLLLLPPPPHHQQRRRRIIIMTTTTNNKKSSRRVVVVAAAADDEEGGGG	FFLLSSSSYY??CC?WLLLLPPPPHHQQRRRRIIIMTTTTNNKKSSRKVVVVAAAADDEEGGGG	1	AGG	R	K	558	382432	No	tRNA(CCU) appears to be arginine-type due to A20				0.64
GCA_000264295.1-AGG	347483	B	GCA_000264295.1	Rhodanobacter spathiphylli B39	TRUE	FFLLSSSSYY**CC*WLLLLPPPPHHQQRRRRIIIMTTTTNNKKSSRRVVVVAAAADDEEGGGG	FFLLSSSSYY??CC?WLLLLPPPPHHQQRRRRIIIMTTTTNNKKSS?KVVVVAAAADDEEGGGG	1	AGG	R	K	654	391225	No	tRNA(CCU) appears to be arginine-type due to A20				0.67
GCA_000016665.1-AGG	357808	B	GCA_000016665.1	Roseiflexus sp. RS-1	TRUE	FFLLSSSSYY**CC*WLLLLPPPPHHQQRRRRIIIMTTTTNNKKSSRRVVVVAAAADDEEGGGG	FFLLSSSSYY??CC?WLLLLPPPPHHQQRRRRIIIMTTTTNNKKSSRKVVVVAAAADDEEGGGG	1	AGG	R	K	575	474646	No	tRNA(CCU) appears to be arginine-type due to A20				0.6
GCA_000334915.1-AGG	363848	B	GCA_000334915.1	Dyella ginsengisoli LA-4	TRUE	FFLLSSSSYY**CC*WLLLLPPPPHHQQRRRRIIIMTTTTNNKKSSRRVVVVAAAADDEEGGGG	FFLLSSSSYY??CC?WLLLLPPPPHHQQRRRRIIIMTTTTNNKKSSRKVVVVAAAADDEEGGGG	1	AGG	R	K	599	433242	No	tRNA(CCU) appears to be arginine-type due to A20				0.68
GCA_900141795.1-AGG	364032	B	GCA_900141795.1	Sulfurivirga caldicuralii	TRUE	FFLLSSSSYY**CC*WLLLLPPPPHHQQRRRRIIIMTTTTNNKKSSRRVVVVAAAADDEEGGGG	FFLLSSSSYY??CC?WLLLLPPPPHHQQRRRRIIIMTTTTNNKKSSRKVVVVAAAADDEEGGGG	1	AGG	R	K	321	225146	No	tRNA(CCU) appears to be arginine-type due to A20				0.59
GCA_900099945.1-AGG	366289	B	GCA_900099945.1	Pseudomonas delhiensis	TRUE	FFLLSSSSYY**CC*WLLLLPPPPHHQQRRRRIIIMTTTTNNKKSSRRVVVVAAAADDEEGGGG	FFLLSSSSYY??CC?WLLLLPPPPHHQQRRRRIIIMTTTTNNKKSSRKVVVVAAAADDEEGGGG	1	AGG	R	K	1139	713487	No	tRNA(CCU) appears to be arginine-type due to A20				0.68
GCA_900187975.1-AGG	366289	B	GCA_900187975.1	Pseudomonas delhiensis	FALSE	FFLLSSSSYY**CC*WLLLLPPPPHHQQRRRRIIIMTTTTNNKKSSRRVVVVAAAADDEEGGGG	FFLLSSSSYY??CC?WLLLLPPPPHHQQRRRRIIIMTTTTNNKKSSRKVVVVAAAADDEEGGGG	1	AGG	R	K	1114	710965	No	tRNA(CCU) appears to be arginine-type due to A20				0.68
GCA_001854325.1-AGG	367825	B	GCA_001854325.1	Cupriavidus malaysiensis	TRUE	FFLLSSSSYY**CC*WLLLLPPPPHHQQRRRRIIIMTTTTNNKKSSRRVVVVAAAADDEEGGGG	FFLLSSSSYY??CC?WLLLLPPPPHHQQRRRRIIIMTTTTNNKKSSRKVVVVAAAADDEEGGGG	1	AGG	R	K	980	729490	No	tRNA(CCU) appears to be arginine-type due to A20				0.68
GCA_000426365.1-AGG	370776	B	GCA_000426365.1	Arenimonas composti TR7-09 = DSM 18010	TRUE	FFLLSSSSYY**CC*WLLLLPPPPHHQQRRRRIIIMTTTTNNKKSSRRVVVVAAAADDEEGGGG	FF?LSSSSYY??CC?WLLLLPPPPHHQQRRRRIIIMTTTTNNKKSSRKVVVVAAAADDEEGGGG	1	AGG	R	K	238	306366	No	tRNA(CCU) appears to be arginine-type due to A20				0.71
GCA_000747175.1-AGG	370776	B	GCA_000747175.1	Arenimonas composti TR7-09 = DSM 18010	FALSE	FFLLSSSSYY**CC*WLLLLPPPPHHQQRRRRIIIMTTTTNNKKSSRRVVVVAAAADDEEGGGG	FF?LSSSSYY??CC?WLLLLPPPPHHQQRRRRIIIMTTTTNNKKSSRKVVVVAAAADDEEGGGG	1	AGG	R	K	236	312569	No	tRNA(CCU) appears to be arginine-type due to A20				0.71
GCA_001311905.1-AGG	373054	B	GCA_001311905.1	Calditerricola satsumensis JCM 14719	TRUE	FFLLSSSSYY**CC*WLLLLPPPPHHQQRRRRIIIMTTTTNNKKSSRRVVVVAAAADDEEGGGG	FFLLSSSSYY??CC?WLLLLPPPPHHQQRRRRIIIMTTTTNNKKSSRKVVVVAAAADDEEGGGG	1	AGG	R	K	303	298067	No	tRNA(CCU) appears to be arginine-type due to A20				0.64
GCA_902826655.1-AGG	381093	B	GCA_902826655.1	uncultured Methylibium sp.	TRUE	FFLLSSSSYY**CC*WLLLLPPPPHHQQRRRRIIIMTTTTNNKKSSRRVVVVAAAADDEEGGGG	FF?LSSSSYY??CC?WLLLLPPPPHHQQRRRRIIIMTTTTNNKKSSRKVVVVAAAADDEEGGGG	1	AGG	R	K	519	430394	No	tRNA(CCU) appears to be arginine-type due to A20				0.7
GCA_004366735.1-AGG	381308	B	GCA_004366735.1	Thiohalophilus thiocyanatoxydans	TRUE	FFLLSSSSYY**CC*WLLLLPPPPHHQQRRRRIIIMTTTTNNKKSSRRVVVVAAAADDEEGGGG	FFLLSSSSYY??CC?WLLLLPPPPHHQQRRRRIIIMTTTTNNKKSSRKVVVVAAAADDEEGGGG	1	AGG	R	K	480	339580	No	tRNA(CCU) appears to be arginine-type due to A20				0.57
GCA_006715055.1-AGG	402171	B	GCA_006715055.1	Lapillicoccus jejuensis	TRUE	FFLLSSSSYY**CC*WLLLLPPPPHHQQRRRRIIIMTTTTNNKKSSRRVVVVAAAADDEEGGGG	FF?LSSSSYY??CC?WLLLLPPPPHHQQRRRRII?MTTTTNNKKSSRKVVVVAAAADDEEGGGG	1	AGG	R	K	270	331100	No	tRNA(CCU) appears to be arginine-type due to A20				0.74
GCA_000474945.1-AGG	413479	B	GCA_000474945.1	Solimonas soli DSM 21787	TRUE	FFLLSSSSYY**CC*WLLLLPPPPHHQQRRRRIIIMTTTTNNKKSSRRVVVVAAAADDEEGGGG	FFLLSSSSYY??CC?WLLLLPPPPHHQQRRRRIIIMTTTTNNKKSSRKVVVVAAAADDEEGGGG	1	AGG	R	K	604	408217	No	tRNA(CCU) appears to be arginine-type due to A20				0.69
GCA_000233915.4-AGG	415229	B	GCA_000233915.4	Pseudoxanthomonas spadix BD-a59	TRUE	FFLLSSSSYY**CC*WLLLLPPPPHHQQRRRRIIIMTTTTNNKKSSRRVVVVAAAADDEEGGGG	FFLLSSSSYY??CC?WLLLLPPPPHHQQRRRRIIIMTTTTNNKKSSRKVVVVAAAADDEEGGGG	1	AGG	R	K	1266	381825	No	tRNA(CCU) appears to be arginine-type due to A20				0.68
GCA_003703395.1-AGG	415229	B	GCA_003703395.1	Pseudoxanthomonas spadix	FALSE	FFLLSSSSYY**CC*WLLLLPPPPHHQQRRRRIIIMTTTTNNKKSSRRVVVVAAAADDEEGGGG	FFLLSSSSYY??CC?WLLLLPPPPHHQQRRRRIIIMTTTTNNKKSSRKVVVVAAAADDEEGGGG	1	AGG	R	K	1199	366453	No	tRNA(CCU) appears to be arginine-type due to A20				0.68
GCA_011620105.1-AGG	415229	B	GCA_011620105.1	Pseudoxanthomonas spadix	FALSE	FFLLSSSSYY**CC*WLLLLPPPPHHQQRRRRIIIMTTTTNNKKSSRRVVVVAAAADDEEGGGG	FFLLSSSSYY??CC?WLLLLPPPPHHQQRRRRIIIMTTTTNNKKSSRKVVVVAAAADDEEGGGG	1	AGG	R	K	783	239250	Missing	No tRNA(CCU) or tRNA(UCU)				0.69
GCA_000426685.1-AGG	415849	B	GCA_000426685.1	Solimonas flava DSM 18980	TRUE	FFLLSSSSYY**CC*WLLLLPPPPHHQQRRRRIIIMTTTTNNKKSSRRVVVVAAAADDEEGGGG	FFLLSSSSYY??CC?WLLLLPPPPHHQQRRRRIIIMTTTTNNKKSSRKVVVVAAAADDEEGGGG	1	AGG	R	K	255	425132	No	tRNA(CCU) appears to be arginine-type due to A20				0.69
GCA_000264375.1-AGG	416169	B	GCA_000264375.1	Rhodanobacter thiooxydans LCS2	TRUE	FFLLSSSSYY**CC*WLLLLPPPPHHQQRRRRIIIMTTTTNNKKSSRRVVVVAAAADDEEGGGG	FFLLSSSSYY??CC?WLLLLPPPPHHQQRRRRIIIMTTTTNNKKSS?KVVVVAAAADDEEGGGG	1	AGG	R	K	500	407833	No	tRNA(CCU) appears to be arginine-type due to A20				0.67
GCA_001617355.1-AGG	416169	B	GCA_001617355.1	Rhodanobacter thiooxydans	FALSE	FFLLSSSSYY**CC*WLLLLPPPPHHQQRRRRIIIMTTTTNNKKSSRRVVVVAAAADDEEGGGG	FFLLSSSSYY??CC?WLLLLPPPPHHQQRRRRIIIMTTTTNNKKSSRKVVVVAAAADDEEGGGG	1	AGG	R	K	521	411860	No	tRNA(CCU) appears to be arginine-type due to A20				0.67
GCA_003069545.1-AGG	416169	B	GCA_003069545.1	Rhodanobacter thiooxydans	FALSE	FFLLSSSSYY**CC*WLLLLPPPPHHQQRRRRIIIMTTTTNNKKSSRRVVVVAAAADDEEGGGG	FFLLSSSSYY??CC?WLLLLPPPPHHQQRRRRIIIMTTTTNNKKSSRKVVVVAAAADDEEGGGG	1	AGG	R	K	465	374139	No	tRNA(CCU) appears to be arginine-type due to A20				0.67
GCA_900096975.1-AGG	416944	B	GCA_900096975.1	Burkholderia sp. TNe-862	TRUE	FFLLSSSSYY**CC*WLLLLPPPPHHQQRRRRIIIMTTTTNNKKSSRRVVVVAAAADDEEGGGG	FFLLSSSSYY??CC?WLLLLPPPPHHQQRRRRIIIMTTTTNNKKSSRKVVVVAAAADDEEGGGG	1	AGG	R	K	1072	691458	No	tRNA(CCU) appears to be arginine-type due to A20				0.65
GCA_001436675.1-AGG	431273	B	GCA_001436675.1	Lactobacillus senmaizukei DSM 21775 = NBRC 103853	FALSE	FFLLSSSSYY**CC*WLLLLPPPPHHQQRRRRIIIMTTTTNNKKSSRRVVVVAAAADDEEGGGG	FFLLSSSSYY??CC?WLLLLPPPPHHQQRRRRIIIMTTTTNNKKSSRKVVVVAAAADDEEGGGG	1	AGG	R	K	112	241704	No	tRNA(CCU) appears to be arginine-type due to A20				0.49
GCA_001476815.1-AGG	433924	B	GCA_001476815.1	Pseudacidovorax intermedius	FALSE	FFLLSSSSYY**CC*WLLLLPPPPHHQQRRRRIIIMTTTTNNKKSSRRVVVVAAAADDEEGGGG	FFLLSSSSYY??CC?WLLLLPPPPHHQQRRRRIIIMTTTTNNKKSSRKVVVVAAAADDEEGGGG	1	AGG	R	K	473	577614	No	tRNA(CCU) appears to be arginine-type due to A20				0.7
GCA_001591345.1-AGG	436515	B	GCA_001591345.1	Variovorax boronicumulans NBRC 103145	FALSE	FFLLSSSSYY**CC*WLLLLPPPPHHQQRRRRIIIMTTTTNNKKSSRRVVVVAAAADDEEGGGG	FFLLSSSSYY??CC?WLLLLPPPPHHQQRRRRIIIMTTTTNNKKSSRKVVVVAAAADDEEGGGG	1	AGG	R	K	332	709116	No	tRNA(CCU) appears to be arginine-type due to A20				0.68
GCA_007677875.1-AGG	436515	B	GCA_007677875.1	Variovorax boronicumulans	FALSE	FFLLSSSSYY**CC*WLLLLPPPPHHQQRRRRIIIMTTTTNNKKSSRRVVVVAAAADDEEGGGG	FFLLSSSSYY??CC?WLLLLPPPPHHQQRRRRIIIMTTTTNNKKSSRKVVVVAAAADDEEGGGG	1	AGG	R	K	605	613381	No	tRNA(CCU) appears to be arginine-type due to A20				0.69
GCA_009811375.1-AGG	436515	B	GCA_009811375.1	Variovorax boronicumulans	FALSE	FFLLSSSSYY**CC*WLLLLPPPPHHQQRRRRIIIMTTTTNNKKSSRRVVVVAAAADDEEGGGG	FFLLSSSSYY??CC?WLLLLPPPPHHQQRRRRIIIMTTTTNNKKSSRKVVVVAAAADDEEGGGG	1	AGG	R	K	341	655170	No	tRNA(CCU) appears to be arginine-type due to A20				0.68
GCA_001641285.1-AGG	445710	B	GCA_001641285.1	Dyella thiooxydans	TRUE	FFLLSSSSYY**CC*WLLLLPPPPHHQQRRRRIIIMTTTTNNKKSSRRVVVVAAAADDEEGGGG	FFLLSSSSYY??CC?WLLLLPPPPHHQQRRRRIIIMTTTTNNKKSSRKVVVVAAAADDEEGGGG	1	AGG	R	K	583	424773	No	tRNA(CCU) appears to be arginine-type due to A20				0.68
GCA_000020805.1-AGG	447217	B	GCA_000020805.1	Anaeromyxobacter sp. K	TRUE	FFLLSSSSYY**CC*WLLLLPPPPHHQQRRRRIIIMTTTTNNKKSSRRVVVVAAAADDEEGGGG	FF?LSSSSYY??CC?WLLLLPPPPHHQQRRRRIIIMTTTTNNKKSS?KVVVVAAAADDEEGGGG	1	AGG	R	K	377	379797	No	tRNA(CCU) appears to be arginine-type due to A20				0.75
GCA_004357985.1-AGG	453837	B	GCA_004357985.1	Luteimonas aestuarii	TRUE	FFLLSSSSYY**CC*WLLLLPPPPHHQQRRRRIIIMTTTTNNKKSSRRVVVVAAAADDEEGGGG	FFLLSSSSYY??CC?WLLLLPPPPHHQQRRRRIIIMTTTTNNKKSSRKVVVVAAAADDEEGGGG	1	AGG	R	K	609	358599	No	tRNA(CCU) appears to be arginine-type due to A20				0.68
GCA_000378465.1-AGG	457934	B	GCA_000378465.1	Elioraea tepidiphila DSM 17972	TRUE	FFLLSSSSYY**CC*WLLLLPPPPHHQQRRRRIIIMTTTTNNKKSSRRVVVVAAAADDEEGGGG	FF?LSSSSYY??CC?WLLLLPPPPHHQQRRRRIIIMTTTTNNKKSSKKVVVVAAAADDEEGGGG	2	AGG	R	K	588	414909	No	tRNA(CCU) appears to be arginine-type due to A20				0.71
GCA_000226295.1-AGG	458033	B	GCA_000226295.1	Chloracidobacterium thermophilum B	TRUE	FFLLSSSSYY**CC*WLLLLPPPPHHQQRRRRIIIMTTTTNNKKSSRRVVVVAAAADDEEGGGG	FFLLSSSSYY??CC?WLLLLPPPPHHQQRRRRIIIMTTTTNNKKSSRKVVVVAAAADDEEGGGG	1	AGG	R	K	506	330912	No	tRNA(CCU) appears to be arginine-type due to A20				0.61
GCA_001482755.1-AGG	458033	B	GCA_001482755.1	Chloracidobacterium thermophilum	FALSE	FFLLSSSSYY**CC*WLLLLPPPPHHQQRRRRIIIMTTTTNNKKSSRRVVVVAAAADDEEGGGG	FFLLSSSSYY??CC?WLLLLPPPPHHQQRRRRIIIMTTTTNNKKSSRKVVVVAAAADDEEGGGG	1	AGG	R	K	420	322407	No	tRNA(CCU) appears to be arginine-type due to A20				0.62
GCA_007679965.1-AGG	463040	B	GCA_007679965.1	Bordetella genomosp. 13	FALSE	FFLLSSSSYY**CC*WLLLLPPPPHHQQRRRRIIIMTTTTNNKKSSRRVVVVAAAADDEEGGGG	FFLLSSSSYY??CC?WLLLLPPPPHHQQRRRRIIIMTTTTNNKKSSRKVVVVAAAADDEEGGGG	1	AGG	R	K	727	573984	No	tRNA(CCU) appears to be arginine-type due to A20				0.69
GCA_001660385.1-AGG	483545	B	GCA_001660385.1	Thermobifida halotolerans	TRUE	FFLLSSSSYY**CC*WLLLLPPPPHHQQRRRRIIIMTTTTNNKKSSRRVVVVAAAADDEEGGGG	FFLLSSSSYY??CC?WLLLLPPPPHHQQRRRRIIIMTTTTNNKKSSRKVVVVAAAADDEEGGGG	1	AGG	R	K	1502	372738	No	tRNA(CCU) appears to be arginine-type due to A20				0.71
GCA_900101175.1-AGG	487698	B	GCA_900101175.1	Stenotrophomonas pavanii	TRUE	FFLLSSSSYY**CC*WLLLLPPPPHHQQRRRRIIIMTTTTNNKKSSRRVVVVAAAADDEEGGGG	FF?LSSSSYY??CC?WLLLLPPPPHHQQRRRRIIIMTTTTNNKKSS?KVVVVAAAADDEEGGGG	1	AGG	R	K	385	442523	No	tRNA(CCU) appears to be arginine-type due to A20				0.67
GCA_001431565.1-AGG	487698	B	GCA_001431565.1	Stenotrophomonas pavanii	FALSE	FFLLSSSSYY**CC*WLLLLPPPPHHQQRRRRIIIMTTTTNNKKSSRRVVVVAAAADDEEGGGG	FF?LSSSSYY??CC?WLLLLPPPPHHQQRRRRIIIMTTTTNNKKSS?KVVVVAAAADDEEGGGG	1	AGG	R	K	371	448238	No	tRNA(CCU) appears to be arginine-type due to A20				0.67
GCA_002901405.1-AGG	487698	B	GCA_002901405.1	Stenotrophomonas pavanii	FALSE	FFLLSSSSYY**CC*WLLLLPPPPHHQQRRRRIIIMTTTTNNKKSSRRVVVVAAAADDEEGGGG	FF?LSSSSYY??CC?WLLLLPPPPHHQQRRRRIIIMTTTTNNKKSS?KVVVVAAAADDEEGGGG	1	AGG	R	K	369	444151	No	tRNA(CCU) appears to be arginine-type due to A20				0.67
GCA_011043715.1-AGG	487698	B	GCA_011043715.1	Stenotrophomonas pavanii	FALSE	FFLLSSSSYY**CC*WLLLLPPPPHHQQRRRRIIIMTTTTNNKKSSRRVVVVAAAADDEEGGGG	FF?LSSSSYY??CC?WLLLLPPPPHHQQRRRRIIIMTTTTNNKKSS?KVVVVAAAADDEEGGGG	1	AGG	R	K	383	446242	No	tRNA(CCU) appears to be arginine-type due to A20				0.67
GCA_007859325.1-AGG	488485	B	GCA_007859325.1	Luteimonas marina	TRUE	FFLLSSSSYY**CC*WLLLLPPPPHHQQRRRRIIIMTTTTNNKKSSRRVVVVAAAADDEEGGGG	FFLLSSSSYY??CC?WLLLLPPPPHHQQRRRRIIIMTTTTNNKKSSRKVVVVAAAADDEEGGGG	1	AGG	R	K	762	381318	No	tRNA(CCU) appears to be arginine-type due to A20				0.69
GCA_900111015.1-AGG	489703	B	GCA_900111015.1	Solimonas aquatica	TRUE	FFLLSSSSYY**CC*WLLLLPPPPHHQQRRRRIIIMTTTTNNKKSSRRVVVVAAAADDEEGGGG	FFLLSSSSYY??CC?WLLLLPPPPHHQQRRRRIIIMTTTTNNKKSSRKVVVVAAAADDEEGGGG	1	AGG	R	K	455	438752	No	tRNA(CCU) appears to be arginine-type due to A20				0.66
GCA_000374625.1-AGG	491919	B	GCA_000374625.1	Brachymonas chironomi DSM 19884	TRUE	FFLLSSSSYY**CC*WLLLLPPPPHHQQRRRRIIIMTTTTNNKKSSRRVVVVAAAADDEEGGGG	FFLLSSSSYY??CC?WLLLLPPPPHHQQRRRRIIIMTTTTNNKKSSRKVVVVAAAADDEEGGGG	1	AGG	R	K	264	302068	No	tRNA(CCU) appears to be arginine-type due to A20				0.64
GCA_900112865.1-AGG	500610	B	GCA_900112865.1	Dyella marensis	TRUE	FFLLSSSSYY**CC*WLLLLPPPPHHQQRRRRIIIMTTTTNNKKSSRRVVVVAAAADDEEGGGG	FFLLSSSSYY??CC?WLLLLPPPPHHQQRRRRIIIMTTTTNNKKSSRKVVVVAAAADDEEGGGG	1	AGG	R	K	516	449906	No	tRNA(CCU) appears to be arginine-type due to A20				0.67
GCA_900115705.1-AGG	529704	B	GCA_900115705.1	Frateuria terrea	TRUE	FFLLSSSSYY**CC*WLLLLPPPPHHQQRRRRIIIMTTTTNNKKSSRRVVVVAAAADDEEGGGG	FFLLSSSSYY??CC?WLLLLPPPPHHQQRRRRIIIMTTTTNNKKSS?KVVVVAAAADDEEGGGG	1	AGG	R	K	664	375056	No	tRNA(CCU) appears to be arginine-type due to A20				0.68
GCA_900109025.1-AGG	529704	B	GCA_900109025.1	Frateuria terrea	FALSE	FFLLSSSSYY**CC*WLLLLPPPPHHQQRRRRIIIMTTTTNNKKSSRRVVVVAAAADDEEGGGG	FFLLSSSSYY??CC?WLLLLPPPPHHQQRRRRIIIMTTTTNNKKSS?KVVVVAAAADDEEGGGG	1	AGG	R	K	661	375331	No	tRNA(CCU) appears to be arginine-type due to A20				0.68
GCA_900538695.1-AGG	538949	B	GCA_900538695.1	uncultured Alistipes sp.	FALSE	FFLLSSSSYY**CC*WLLLLPPPPHHQQRRRRIIIMTTTTNNKKSSRRVVVVAAAADDEEGGGG	FFLLSSSSYY??CC?WLLLLPPPPHHQQRRRRIIIMTTTTNNKKSSRKVVVVAAAADDEEGGGG	1	AGG	R	K	506	271798	No	tRNA(CCU) appears to be arginine-type due to A20				0.62
GCA_900552955.1-AGG	538949	B	GCA_900552955.1	uncultured Alistipes sp.	FALSE	FFLLSSSSYY**CC*WLLLLPPPPHHQQRRRRIIIMTTTTNNKKSSRRVVVVAAAADDEEGGGG	FFLLSSSSYY??CC?WLLLLPPPPHHQQRRRRIIIMTTTTNNKKSSRKVVVVAAAADDEEGGGG	1	AGG	R	K	306	191017	No	tRNA(CCU) appears to be arginine-type due to A20				0.63
GCA_900540595.1-AGG	541003	B	GCA_900540595.1	uncultured Ruminococcaceae bacterium	FALSE	FFLLSSSSYY**CC*WLLLLPPPPHHQQRRRRIIIMTTTTNNKKSSRRVVVVAAAADDEEGGGG	FFLLSSSSYY??CC?WLLLLPPPPHHQQRRRRIIIMTTTTNNKKSSRKVVVVAAAADDEEGGGG	1	AGG	R	K	286	272146	No	No tRNA(CCU), Arg-type tRNA(UCU)				0.59
GCA_000382345.1-AGG	544911	B	GCA_000382345.1	Massilia niastensis DSM 21313	TRUE	FFLLSSSSYY**CC*WLLLLPPPPHHQQRRRRIIIMTTTTNNKKSSRRVVVVAAAADDEEGGGG	FFLLSSSSYY??CC?WLLLLPPPPHHQQRRRRIIIMTTTTNNKKSSRKVVVVAAAADDEEGGGG	1	AGG	R	K	1654	658802	No	tRNA(CCU) appears to be arginine-type due to A20				0.66
GCA_003337735.1-AGG	547122	B	GCA_003337735.1	Thioalbus denitrificans	TRUE	FFLLSSSSYY**CC*WLLLLPPPPHHQQRRRRIIIMTTTTNNKKSSRRVVVVAAAADDEEGGGG	FFLLSSSSYY??CC?WLLLLPPPPHHQQRRRRIIIMTTTTNNKKSSRKVVVVAAAADDEEGGGG	1	AGG	R	K	714	425768	No	tRNA(CCU) appears to be arginine-type due to A20				0.68
GCA_009720825.1-AGG	551988	B	GCA_009720825.1	Duganella radicis	TRUE	FFLLSSSSYY**CC*WLLLLPPPPHHQQRRRRIIIMTTTTNNKKSSRRVVVVAAAADDEEGGGG	FFLLSSSSYY??CC?WLLLLPPPPHHQQRRRRIIIMTTTTNNKKSSRKVVVVAAAADDEEGGGG	1	AGG	R	K	717	688563	No	tRNA(CCU) appears to be arginine-type due to A20				0.64
GCA_000334215.1-AGG	553386	B	GCA_000334215.1	Halomonas jeotgali Hwa	TRUE	FFLLSSSSYY**CC*WLLLLPPPPHHQQRRRRIIIMTTTTNNKKSSRRVVVVAAAADDEEGGGG	FFLLSSSSYY??CC?WLLLLPPPPHHQQRRRRIIIMTTTTNNKKSSRKVVVVAAAADDEEGGGG	1	AGG	R	K	528	335449	No	tRNA(CCU) appears to be arginine-type due to A20				0.63
GCA_003798325.1-AGG	556499	B	GCA_003798325.1	Propionibacterium acidifaciens	TRUE	FFLLSSSSYY**CC*WLLLLPPPPHHQQRRRRIIIMTTTTNNKKSSRRVVVVAAAADDEEGGGG	FFLLSSSSYY??CC?WLLLLPPPPHHQQRRRRIIIMTTTTNNKKSSRKVVVVAAAADDEEGGGG	1	AGG	R	K	1233	230067	No	tRNA(CCU) appears to be arginine-type due to A20				0.71
GCA_000426605.1-AGG	556499	B	GCA_000426605.1	Propionibacterium acidifaciens DSM 21887	FALSE	FFLLSSSSYY**CC*WLLLLPPPPHHQQRRRRIIIMTTTTNNKKSSRRVVVVAAAADDEEGGGG	FFLLSSSSYY??CC?WLLLLPPPPHHQQRRRRIIIMTTTTNNKKSSRKVVVVAAAADDEEGGGG	1	AGG	R	K	1370	251781	No	tRNA(CCU) appears to be arginine-type due to A20				0.71
GCA_000478805.1-AGG	556499	B	GCA_000478805.1	Propionibacterium acidifaciens F0233	FALSE	FFLLSSSSYY**CC*WLLLLPPPPHHQQRRRRIIIMTTTTNNKKSSRRVVVVAAAADDEEGGGG	FFLLSSSSYY??CC?WLLLLPPPPHHQQRRRRIIIMTTTTNNKKSSRKVVVVAAAADDEEGGGG	1	AGG	R	K	1482	273519	No	tRNA(CCU) appears to be arginine-type due to A20				0.7
GCA_002345605.1-AGG	558537	B	GCA_002345605.1	Delftia lacustris	FALSE	FFLLSSSSYY**CC*WLLLLPPPPHHQQRRRRIIIMTTTTNNKKSSRRVVVVAAAADDEEGGGG	FFLLSSSSYY??CC?WLLLLPPPPHHQQRRRRIIIMTTTTNNKKSSRKVVVVAAAADDEEGGGG	1	AGG	R	K	1041	622526	No	tRNA(CCU) appears to be arginine-type due to A20				0.67
GCA_003116135.1-AGG	568898	B	GCA_003116135.1	Roseomonas aestuarii	TRUE	FFLLSSSSYY**CC*WLLLLPPPPHHQQRRRRIIIMTTTTNNKKSSRRVVVVAAAADDEEGGGG	FFLLSSSSYY??CC?WLLLLPPPPHHQQRRRRIIIMTTTTNNKKSSRKVVVVAAAADDEEGGGG	1	AGG	R	K	489	452526	No	tRNA(CCU) appears to be arginine-type due to A20				0.71
GCA_008000795.1-AGG	582702	B	GCA_008000795.1	Rhodanobacter glycinis	TRUE	FFLLSSSSYY**CC*WLLLLPPPPHHQQRRRRIIIMTTTTNNKKSSRRVVVVAAAADDEEGGGG	FFLLSSSSYY??CC?WLLLLPPPPHHQQRRRRIIIMTTTTNNKKSSRKVVVVAAAADDEEGGGG	1	AGG	R	K	271	423416	No	tRNA(CCU) appears to be arginine-type due to A20				0.65
GCA_900114325.1-AGG	582702	B	GCA_900114325.1	Rhodanobacter glycinis	FALSE	FFLLSSSSYY**CC*WLLLLPPPPHHQQRRRRIIIMTTTTNNKKSSRRVVVVAAAADDEEGGGG	FFLLSSSSYY??CC?WLLLLPPPPHHQQRRRRIIIMTTTTNNKKSSRKVVVVAAAADDEEGGGG	1	AGG	R	K	251	393696	No	tRNA(CCU) appears to be arginine-type due to A20				0.65
GCA_002356355.1-AGG	585455	B	GCA_002356355.1	Thiohalobacter thiocyanaticus	TRUE	FFLLSSSSYY**CC*WLLLLPPPPHHQQRRRRIIIMTTTTNNKKSSRRVVVVAAAADDEEGGGG	FFLLSSSSYY??CC?WLLLLPPPPHHQQRRRRIIIMTTTTNNKKSSRKVVVVAAAADDEEGGGG	1	AGG	R	K	753	365216	No	tRNA(CCU) appears to be arginine-type due to A20				0.64
GCA_003932505.1-AGG	585455	B	GCA_003932505.1	Thiohalobacter thiocyanaticus	FALSE	FFLLSSSSYY**CC*WLLLLPPPPHHQQRRRRIIIMTTTTNNKKSSRRVVVVAAAADDEEGGGG	FFLLSSSSYY??CC?WLLLLPPPPHHQQRRRRIIIMTTTTNNKKSSRKVVVVAAAADDEEGGGG	1	AGG	R	K	851	336270	No	tRNA(CCU) appears to be arginine-type due to A20				0.64
GCA_900142415.1-AGG	633813	B	GCA_900142415.1	Rhodothermus profundi	TRUE	FFLLSSSSYY**CC*WLLLLPPPPHHQQRRRRIIIMTTTTNNKKSSRRVVVVAAAADDEEGGGG	FFLLSSSSYY??CC?WLLLLPPPPHHQQRRRRIIIMTTTTNNKKSSKKVVVVAAAADDEEGGGG	2	AGG	R	K	242	324115	No	tRNA(CCU) appears to be arginine-type due to A20				0.59
GCA_001029105.3-AGG	656179	B	GCA_001029105.3	Pandoraea faecigallinarum	TRUE	FFLLSSSSYY**CC*WLLLLPPPPHHQQRRRRIIIMTTTTNNKKSSRRVVVVAAAADDEEGGGG	FFLLSSSSYY??CC?WLLLLPPPPHHQQRRRRIIIMTTTTNNKKSSRKVVVVAAAADDEEGGGG	1	AGG	R	K	646	562675	No	tRNA(CCU) appears to be arginine-type due to A20				0.63
GCA_001431505.1-AGG	659018	B	GCA_001431505.1	Stenotrophomonas daejeonensis	TRUE	FFLLSSSSYY**CC*WLLLLPPPPHHQQRRRRIIIMTTTTNNKKSSRRVVVVAAAADDEEGGGG	FFLLSSSSYY??CC?WLLLLPPPPHHQQRRRRIIIMTTTTNNKKSSRKVVVVAAAADDEEGGGG	1	AGG	R	K	487	367305	No	tRNA(CCU) appears to be arginine-type due to A20				0.69
GCA_000230695.3-AGG	666685	B	GCA_000230695.3	Rhodanobacter denitrificans	TRUE	FFLLSSSSYY**CC*WLLLLPPPPHHQQRRRRIIIMTTTTNNKKSSRRVVVVAAAADDEEGGGG	FFLLSSSSYY??CC?WLLLLPPPPHHQQRRRRIIIMTTTTNNKKSS?KVVVVAAAADDEEGGGG	1	AGG	R	K	505	400241	No	tRNA(CCU) appears to be arginine-type due to A20				0.67
GCA_000264355.1-AGG	666685	B	GCA_000264355.1	Rhodanobacter denitrificans	FALSE	FFLLSSSSYY**CC*WLLLLPPPPHHQQRRRRIIIMTTTTNNKKSSRRVVVVAAAADDEEGGGG	FFLLSSSSYY??CC?WLLLLPPPPHHQQRRRRIIIMTTTTNNKKSSRKVVVVAAAADDEEGGGG	1	AGG	R	K	487	391647	No	tRNA(CCU) appears to be arginine-type due to A20				0.67
GCA_001617385.1-AGG	666685	B	GCA_001617385.1	Rhodanobacter denitrificans	FALSE	FFLLSSSSYY**CC*WLLLLPPPPHHQQRRRRIIIMTTTTNNKKSSRRVVVVAAAADDEEGGGG	FFLLSSSSYY??CC?WLLLLPPPPHHQQRRRRIIIMTTTTNNKKSS?KVVVVAAAADDEEGGGG	1	AGG	R	K	655	540279	No	tRNA(CCU) appears to be arginine-type due to A20				0.68
GCA_003335105.1-AGG	666685	B	GCA_003335105.1	Rhodanobacter denitrificans	FALSE	FFLLSSSSYY**CC*WLLLLPPPPHHQQRRRRIIIMTTTTNNKKSSRRVVVVAAAADDEEGGGG	FFLLSSSSYY??CC?WLLLLPPPPHHQQRRRRIIIMTTTTNNKKSS?KVVVVAAAADDEEGGGG	1	AGG	R	K	559	368329	No	tRNA(CCU) appears to be arginine-type due to A20				0.67
GCA_012972865.1-AGG	666685	B	GCA_012972865.1	Rhodanobacter denitrificans	FALSE	FFLLSSSSYY**CC*WLLLLPPPPHHQQRRRRIIIMTTTTNNKKSSRRVVVVAAAADDEEGGGG	FFLLSSSSYY??CC?WLLLLPPPPHHQQRRRRIIIMTTTTNNKKSSRKVVVVAAAADDEEGGGG	1	AGG	R	K	422	302764	No	No tRNA(CCU), Arg-type tRNA(UCU)				0.65
GCA_001544075.1-AGG	673548	B	GCA_001544075.1	Comamonas terrae	TRUE	FFLLSSSSYY**CC*WLLLLPPPPHHQQRRRRIIIMTTTTNNKKSSRRVVVVAAAADDEEGGGG	FFLLSSSSYY??CC?WLLLLPPPPHHQQRRRRIIIMTTTTNNKKSSRKVVVVAAAADDEEGGGG	1	AGG	R	K	1257	503157	No	tRNA(CCU) appears to be arginine-type due to A20				0.66
GCA_000876225.1-AGG	686309	B	GCA_000876225.1	Micromonospora haikouensis	FALSE	FFLLSSSSYY**CC*WLLLLPPPPHHQQRRRRIIIMTTTTNNKKSSRRVVVVAAAADDEEGGGG	FF?LSSSSYY??CC?WLLLLPPPPHHQQRRRRIIIMTTTTNNKKSSRKVVVVAAAADDEEGGGG	1	AGG	R	K	475	511102	No	tRNA(CCU) appears to be arginine-type due to A20				0.74
GCA_003116015.1-AGG	716789	B	GCA_003116015.1	Azospirillum sp. TSO22-1	TRUE	FFLLSSSSYY**CC*WLLLLPPPPHHQQRRRRIIIMTTTTNNKKSSRRVVVVAAAADDEEGGGG	FFLLSSSSYY??CC?WLLLLPPPPHHQQRRRRIIIMTTTTNNKKSS?KVVVVAAAADDEEGGGG	1	AGG	R	K	812	678659	No	tRNA(CCU) appears to be arginine-type due to A20				0.7
GCA_003201595.1-AGG	744406	B	GCA_003201595.1	Sphaerotilus hippei	TRUE	FFLLSSSSYY**CC*WLLLLPPPPHHQQRRRRIIIMTTTTNNKKSSRRVVVVAAAADDEEGGGG	FFLLSSSSYY??CC?WLLLLPPPPHHQQRRRRIIIMTTTTNNKKSSRKVVVVAAAADDEEGGGG	1	AGG	R	K	440	439725	No	tRNA(CCU) appears to be arginine-type due to A20				0.7
GCA_902363055.1-AGG	745368	B	GCA_902363055.1	Gemmiger formicilis	FALSE	FFLLSSSSYY**CC*WLLLLPPPPHHQQRRRRIIIMTTTTNNKKSSRRVVVVAAAADDEEGGGG	FFLLSSSSYY??CC?WLLLLPPPPHHQQRRRRIIIMTTTTNNKKSSRKVVVVAAAADDEEGGGG	1	AGG	R	K	434	279920	No	tRNA(CCU) appears to be arginine-type due to A20				0.58
GCA_002105195.1-AGG	764842	B	GCA_002105195.1	Derxia lacustris	TRUE	FFLLSSSSYY**CC*WLLLLPPPPHHQQRRRRIIIMTTTTNNKKSSRRVVVVAAAADDEEGGGG	FFLLSSSSYY??CC?WLLLLPPPPHHQQRRRRIIIMTTTTNNKKSSRKVVVVAAAADDEEGGGG	1	AGG	R	K	401	490728	No	tRNA(CCU) appears to be arginine-type due to A20				0.69
GCA_000242935.3-AGG	794903	B	GCA_000242935.3	Opitutaceae bacterium TAV5	TRUE	FFLLSSSSYY**CC*WLLLLPPPPHHQQRRRRIIIMTTTTNNKKSSRRVVVVAAAADDEEGGGG	FFLLSSSSYY??CC?WLLLLPPPPHHQQRRRRIIIMTTTTNNKKSSRKVVVVAAAADDEEGGGG	1	AGG	R	K	633	414097	No	tRNA(CCU) appears to be arginine-type due to A20				0.63
GCA_900109185.1-AGG	856736	B	GCA_900109185.1	Deinococcus reticulitermitis	TRUE	FFLLSSSSYY**CC*WLLLLPPPPHHQQRRRRIIIMTTTTNNKKSSRRVVVVAAAADDEEGGGG	FFLLSSSSYY??CC?WLLLLPPPPHHQQRRRRIIIMTTTTNNKKSSRKVVVVAAAADDEEGGGG	1	AGG	R	K	578	320220	No	tRNA(CCU) appears to be arginine-type due to A20				0.69
GCA_000687165.1-AGG	862720	B	GCA_000687165.1	Acidovorax oryzae ATCC 19882	TRUE	FFLLSSSSYY**CC*WLLLLPPPPHHQQRRRRIIIMTTTTNNKKSSRRVVVVAAAADDEEGGGG	FFLLSSSSYY??CC?WLLLLPPPPHHQQRRRRIIIMTTTTNNKKSSRKVVVVAAAADDEEGGGG	1	AGG	R	K	695	539067	No	tRNA(CCU) appears to be arginine-type due to A20				0.69
GCA_000218805.2-AGG	862720	B	GCA_000218805.2	Acidovorax oryzae	FALSE	FFLLSSSSYY**CC*WLLLLPPPPHHQQRRRRIIIMTTTTNNKKSSRRVVVVAAAADDEEGGGG	FFLLSSSSYY??CC?WLLLLPPPPHHQQRRRRIIIMTTTTNNKKSSRKVVVVAAAADDEEGGGG	1	AGG	R	K	694	551507	No	tRNA(CCU) appears to be arginine-type due to A20				0.69
GCA_001476895.1-AGG	869719	B	GCA_001476895.1	Sphingomonas endophytica	TRUE	FFLLSSSSYY**CC*WLLLLPPPPHHQQRRRRIIIMTTTTNNKKSSRRVVVVAAAADDEEGGGG	FFLLSSSSYY??CC?WLLLLPPPPHHQQRRRRIIIMTTTTNNKKSSRKVVVVAAAADDEEGGGG	1	AGG	R	K	314	366524	No	tRNA(CCU) appears to be arginine-type due to A20				0.68
GCA_900556925.1-AGG	876091	B	GCA_900556925.1	uncultured Oscillibacter sp.	FALSE	FFLLSSSSYY**CC*WLLLLPPPPHHQQRRRRIIIMTTTTNNKKSSRRVVVVAAAADDEEGGGG	FFLLSSSSYY??CC?WLLLLPPPPHHQQRRRRIIIMTTTTNNKKSSRKVVVVAAAADDEEGGGG	1	AGG	R	K	384	196864	Missing	No tRNA(CCU) or tRNA(UCU)				0.64
GCA_007829385.1-AGG	935283	B	GCA_007829385.1	Luteimonas sp. J16	TRUE	FFLLSSSSYY**CC*WLLLLPPPPHHQQRRRRIIIMTTTTNNKKSSRRVVVVAAAADDEEGGGG	FF?LSSSSYY??CC?WLLLLPPPPHHQQRRRRIIIMTTTTNNKKSS?KVVVVAAAADDEEGGGG	1	AGG	R	K	690	352844	No	tRNA(CCU) appears to be arginine-type due to A20				0.72
GCA_000518925.1-AGG	935848	B	GCA_000518925.1	Paracoccus sp. J39	TRUE	FFLLSSSSYY**CC*WLLLLPPPPHHQQRRRRIIIMTTTTNNKKSSRRVVVVAAAADDEEGGGG	FFLLSSSSYY??CC?WLLLLPPPPHHQQRRRRIIIMTTTTNNKKSSRKVVVVAAAADDEEGGGG	1	AGG	R	K	822	472034	No	tRNA(CCU) appears to be arginine-type due to A20				0.68
GCA_000510725.1-AGG	935851	B	GCA_000510725.1	Pseudoxanthomonas sp. J31	TRUE	FFLLSSSSYY**CC*WLLLLPPPPHHQQRRRRIIIMTTTTNNKKSSRRVVVVAAAADDEEGGGG	FF?LSSSSYY??CC?WLLLLPPPPHHQQRRRRIIIMTTTTNNKKSSRKVVVVAAAADDEEGGGG	1	AGG	R	K	431	343928	No	tRNA(CCU) appears to be arginine-type due to A20				0.71
GCA_000513995.1-AGG	935852	B	GCA_000513995.1	Pseudoxanthomonas sp. J35	TRUE	FFLLSSSSYY**CC*WLLLLPPPPHHQQRRRRIIIMTTTTNNKKSSRRVVVVAAAADDEEGGGG	FFLLSSSSYY??CC?WLLLLPPPPHHQQRRRRIIIMTTTTNNKKSS?KVVVVAAAADDEEGGGG	1	AGG	R	K	481	335811	No	tRNA(CCU) appears to be arginine-type due to A20				0.71
GCA_000472505.1-AGG	935863	B	GCA_000472505.1	Luteimonas sp. J29	TRUE	FFLLSSSSYY**CC*WLLLLPPPPHHQQRRRRIIIMTTTTNNKKSSRRVVVVAAAADDEEGGGG	FF?LSSSSYY??CC?WLLLLPPPPHHQQRRRRIIIMTTTTNNKKSS?KVVVVAAAADDEEGGGG	1	AGG	R	K	656	338214	No	tRNA(CCU) appears to be arginine-type due to A20				0.72
GCA_003664285.1-AGG	942865	B	GCA_003664285.1	Cupriavidus plantarum	FALSE	FFLLSSSSYY**CC*WLLLLPPPPHHQQRRRRIIIMTTTTNNKKSSRRVVVVAAAADDEEGGGG	FFLLSSSSYY??CC?WLLLLPPPPHHQQRRRRIIIMTTTTNNKKSSRKVVVVAAAADDEEGGGG	1	AGG	R	K	770	680120	No	tRNA(CCU) appears to be arginine-type due to A20				0.66
GCA_900094595.1-AGG	942866	B	GCA_900094595.1	Cupriavidus alkaliphilus	TRUE	FFLLSSSSYY**CC*WLLLLPPPPHHQQRRRRIIIMTTTTNNKKSSRRVVVVAAAADDEEGGGG	FFLLSSSSYY??CC?WLLLLPPPPHHQQRRRRIIIMTTTTNNKKSSRKVVVVAAAADDEEGGGG	1	AGG	R	K	856	619174	No	tRNA(CCU) appears to be arginine-type due to A20				0.68
GCA_003096375.1-AGG	942866	B	GCA_003096375.1	Cupriavidus alkaliphilus	FALSE	FFLLSSSSYY**CC*WLLLLPPPPHHQQRRRRIIIMTTTTNNKKSSRRVVVVAAAADDEEGGGG	FFLLSSSSYY??CC?WLLLLPPPPHHQQRRRRIIIMTTTTNNKKSSRKVVVVAAAADDEEGGGG	1	AGG	R	K	844	616433	No	tRNA(CCU) appears to be arginine-type due to A20				0.68
GCA_003268995.1-AGG	942866	B	GCA_003268995.1	Cupriavidus alkaliphilus	FALSE	FFLLSSSSYY**CC*WLLLLPPPPHHQQRRRRIIIMTTTTNNKKSSRRVVVVAAAADDEEGGGG	FFLLSSSSYY??CC?WLLLLPPPPHHQQRRRRIIIMTTTTNNKKSSRKVVVVAAAADDEEGGGG	1	AGG	R	K	807	606024	No	tRNA(CCU) appears to be arginine-type due to A20				0.68
GCA_900089585.1-AGG	946078	B	GCA_900089585.1	Micromonospora sediminicola	TRUE	FFLLSSSSYY**CC*WLLLLPPPPHHQQRRRRIIIMTTTTNNKKSSRRVVVVAAAADDEEGGGG	FFLLSSSSYY??CC?WLLLLPPPPHHQQRRRRIIIMTTTTNNKKSSRKVVVVAAAADDEEGGGG	1	AGG	R	K	331	466871	No	tRNA(CCU) appears to be arginine-type due to A20				0.74
GCA_007830035.1-AGG	985012	B	GCA_007830035.1	Luteimonas cucumeris	TRUE	FFLLSSSSYY**CC*WLLLLPPPPHHQQRRRRIIIMTTTTNNKKSSRRVVVVAAAADDEEGGGG	FFLLSSSSYY??CC?WLLLLPPPPHHQQRRRRIIIMTTTTNNKKSSRKVVVVAAAADDEEGGGG	1	AGG	R	K	626	364075	No	tRNA(CCU) appears to be arginine-type due to A20				0.66
GCA_003201205.1-AGG	985250	B	GCA_003201205.1	Sinimarinibacterium flocculans	TRUE	FFLLSSSSYY**CC*WLLLLPPPPHHQQRRRRIIIMTTTTNNKKSSRRVVVVAAAADDEEGGGG	FFLLSSSSYY??CC?WLLLLPPPPHHQQRRRRIIIMTTTTNNKKSSRKVVVVAAAADDEEGGGG	1	AGG	R	K	579	425104	No	tRNA(CCU) appears to be arginine-type due to A20				0.68
GCA_002077135.1-AGG	993689	B	GCA_002077135.1	Metallibacterium scheffleri	TRUE	FFLLSSSSYY**CC*WLLLLPPPPHHQQRRRRIIIMTTTTNNKKSSRRVVVVAAAADDEEGGGG	FFLLSSSSYY??CC?WLLLLPPPPHHQQRRRRIIIMTTTTNNKKSSRKVVVVAAAADDEEGGGG	1	AGG	R	K	390	342843	No	tRNA(CCU) appears to be arginine-type due to A20				0.66
GCA_004798955.1-AGG	993689	B	GCA_004798955.1	Metallibacterium scheffleri	FALSE	FFLLSSSSYY**CC*WLLLLPPPPHHQQRRRRIIIMTTTTNNKKSSRRVVVVAAAADDEEGGGG	FFLLSSSSYY??CC?WLLLLPPPPHHQQRRRRIIIMTTTTNNKKSS?KVVVVAAAADDEEGGGG	1	AGG	R	K	385	339798	No	tRNA(CCU) appears to be arginine-type due to A20				0.66
GCA_004217045.1-AGG	1001822	B	GCA_004217045.1	Cupriavidus sp. ASC-9842	TRUE	FFLLSSSSYY**CC*WLLLLPPPPHHQQRRRRIIIMTTTTNNKKSSRRVVVVAAAADDEEGGGG	FFLLSSSSYY??CC?WLLLLPPPPHHQQRRRRIIIMTTTTNNKKSSRKVVVVAAAADDEEGGGG	1	AGG	R	K	690	589049	No	tRNA(CCU) appears to be arginine-type due to A20				0.67
GCA_007830455.1-AGG	1036180	B	GCA_007830455.1	Massilia lurida	TRUE	FFLLSSSSYY**CC*WLLLLPPPPHHQQRRRRIIIMTTTTNNKKSSRRVVVVAAAADDEEGGGG	FFLLSSSSYY??CC?WLLLLPPPPHHQQRRRRIIIMTTTTNNKKSSRKVVVVAAAADDEEGGGG	1	AGG	R	K	584	554349	No	tRNA(CCU) appears to be arginine-type due to A20				0.66
GCA_000372525.1-AGG	1040979	B	GCA_000372525.1	Cupriavidus neocaledonicus	TRUE	FFLLSSSSYY**CC*WLLLLPPPPHHQQRRRRIIIMTTTTNNKKSSRRVVVVAAAADDEEGGGG	FFLLSSSSYY??CC?WLLLLPPPPHHQQRRRRIIIMTTTTNNKKSSRKVVVVAAAADDEEGGGG	1	AGG	R	K	1157	664896	No	tRNA(CCU) appears to be arginine-type due to A20				0.67
GCA_000473345.1-AGG	1076523	B	GCA_000473345.1	Rhodanobacter sp. OR87	TRUE	FFLLSSSSYY**CC*WLLLLPPPPHHQQRRRRIIIMTTTTNNKKSSRRVVVVAAAADDEEGGGG	FFLLSSSSYY??CC?WLLLLPPPPHHQQRRRRIIIMTTTTNNKKSS?KVVVVAAAADDEEGGGG	1	AGG	R	K	498	392698	No	tRNA(CCU) appears to be arginine-type due to A20				0.67
GCA_000427545.1-AGG	1076524	B	GCA_000427545.1	Rhodanobacter sp. OR92	TRUE	FFLLSSSSYY**CC*WLLLLPPPPHHQQRRRRIIIMTTTTNNKKSSRRVVVVAAAADDEEGGGG	FFLLSSSSYY??CC?WLLLLPPPPHHQQRRRRIIIMTTTTNNKKSS?KVVVVAAAADDEEGGGG	1	AGG	R	K	480	386795	No	tRNA(CCU) appears to be arginine-type due to A20				0.68
GCA_000427505.1-AGG	1076525	B	GCA_000427505.1	Rhodanobacter sp. OR444	TRUE	FFLLSSSSYY**CC*WLLLLPPPPHHQQRRRRIIIMTTTTNNKKSSRRVVVVAAAADDEEGGGG	FFLLSSSSYY??CC?WLLLLPPPPHHQQRRRRIIIMTTTTNNKKSS?KVVVVAAAADDEEGGGG	1	AGG	R	K	524	404966	No	tRNA(CCU) appears to be arginine-type due to A20				0.67
GCA_900113085.1-AGG	1076937	B	GCA_900113085.1	Fontimonas thermophila	TRUE	FFLLSSSSYY**CC*WLLLLPPPPHHQQRRRRIIIMTTTTNNKKSSRRVVVVAAAADDEEGGGG	FFLLSSSSYY??CC?WLLLLPPPPHHQQRRRRIIIMTTTTNNKKSSKKVVVVAAAADDEEGGGG	2	AGG	R	K	368	327738	No	tRNA(CCU) appears to be arginine-type due to A20				0.65
GCA_000193225.2-AGG	1110389	B	GCA_000193225.2	Verminephrobacter aporrectodeae subsp. tuberculatae At4	TRUE	FFLLSSSSYY**CC*WLLLLPPPPHHQQRRRRIIIMTTTTNNKKSSRRVVVVAAAADDEEGGGG	FFLLSSSSYY??CC?WLLLLPPPPHHQQRRRRIIIMTTTTNNKKSSRKVVVVAAAADDEEGGGG	1	AGG	R	K	1486	526704	No	tRNA(CCU) appears to be arginine-type due to A20				0.66
GCA_000526415.1-AGG	1128421	B	GCA_000526415.1	bacterium JKG1	TRUE	FFLLSSSSYY**CC*WLLLLPPPPHHQQRRRRIIIMTTTTNNKKSSRRVVVVAAAADDEEGGGG	FFLLSSSSYY??CC?WLLLLPPPPHHQQRRRRIIIMTTTTNNKKSSRKVVVVAAAADDEEGGGG	1	AGG	R	K	252	402330	No	tRNA(CCU) appears to be arginine-type due to A20				0.66
GCA_008244685.1-AGG	1132694	B	GCA_008244685.1	Luteimonas sp. XBU10	TRUE	FFLLSSSSYY**CC*WLLLLPPPPHHQQRRRRIIIMTTTTNNKKSSRRVVVVAAAADDEEGGGG	FF?LSSSSYY??CC?WLLLLPPPPHHQQRRRRIIIMTTTTNNKKSS?KVVVVAAAADDEEGGGG	1	AGG	R	K	852	396923	No	tRNA(CCU) appears to be arginine-type due to A20				0.7
GCA_004341245.1-AGG	1133106	B	GCA_004341245.1	Plasticicumulans lactativorans	TRUE	FFLLSSSSYY**CC*WLLLLPPPPHHQQRRRRIIIMTTTTNNKKSSRRVVVVAAAADDEEGGGG	FFLLSSSSYY??CC?WLLLLPPPPHHQQRRRRIIIMTTTTNNKKSSRKVVVVAAAADDEEGGGG	1	AGG	R	K	502	447712	No	tRNA(CCU) appears to be arginine-type due to A20				0.71
GCA_003182485.1-AGG	1137989	B	GCA_003182485.1	Geodermatophilus normandii	TRUE	FFLLSSSSYY**CC*WLLLLPPPPHHQQRRRRIIIMTTTTNNKKSSRRVVVVAAAADDEEGGGG	FF?LSSSSYY??CC?WLLLLPPPPHHQQRRRRII?MTTTTNNKKSS?KVVVVAAAADDEEGGGG	1	AGG	R	K	334	336584	No	tRNA(CCU) appears to be arginine-type due to A20				0.75
GCA_900188205.1-AGG	1137994	B	GCA_900188205.1	Geodermatophilus saharensis	TRUE	FFLLSSSSYY**CC*WLLLLPPPPHHQQRRRRIIIMTTTTNNKKSSRRVVVVAAAADDEEGGGG	FF?LSSSSYY??CC?WLLLLPPPPHHQQRRRRII?MTTTTNNKKSS?KVVVVAAAADDEEGGGG	1	AGG	R	K	274	358588	No	tRNA(CCU) appears to be arginine-type due to A20				0.76
GCA_003208255.1-AGG	1158175	B	GCA_003208255.1	Thioalkalivibrio sp. ALE21	TRUE	FFLLSSSSYY**CC*WLLLLPPPPHHQQRRRRIIIMTTTTNNKKSSRRVVVVAAAADDEEGGGG	FFLLSSSSYY??CC?WLLLLPPPPHHQQRRRRIIIMTTTTNNKKSSRKVVVVAAAADDEEGGGG	1	AGG	R	K	208	306036	No	tRNA(CCU) appears to be arginine-type due to A20				0.68
GCA_000381565.1-AGG	1158293	B	GCA_000381565.1	Oxalobacteraceae bacterium AB_14	TRUE	FFLLSSSSYY**CC*WLLLLPPPPHHQQRRRRIIIMTTTTNNKKSSRRVVVVAAAADDEEGGGG	FFLLSSSSYY??CC?WLLLLPPPPHHQQRRRRIIIMTTTTNNKKSSRKVVVVAAAADDEEGGGG	1	AGG	R	K	837	666260	No	tRNA(CCU) appears to be arginine-type due to A20				0.64
GCA_000264335.1-AGG	1162282	B	GCA_000264335.1	Rhodanobacter sp. 115	TRUE	FFLLSSSSYY**CC*WLLLLPPPPHHQQRRRRIIIMTTTTNNKKSSRRVVVVAAAADDEEGGGG	FFLLSSSSYY??CC?WLLLLPPPPHHQQRRRRIIIMTTTTNNKKSSRKVVVVAAAADDEEGGGG	1	AGG	R	K	355	456210	No	tRNA(CCU) appears to be arginine-type due to A20				0.65
GCA_007923255.1-AGG	1169913	B	GCA_007923255.1	Vulcaniibacterium thermophilum	TRUE	FFLLSSSSYY**CC*WLLLLPPPPHHQQRRRRIIIMTTTTNNKKSSRRVVVVAAAADDEEGGGG	FFLLSSSSYY??CC?WLLLLPPPPHHQQRRRRII?MTTTTNNKKSS?KVVVVAAAADDEEGGGG	1	AGG	R	K	340	313366	No	tRNA(CCU) appears to be arginine-type due to A20				0.71
GCA_007795095.1-AGG	1176533	B	GCA_007795095.1	Luteimonas sp. Gr-4	TRUE	FFLLSSSSYY**CC*WLLLLPPPPHHQQRRRRIIIMTTTTNNKKSSRRVVVVAAAADDEEGGGG	FF?LSSSSYY??CC?WLLLLPPPPHHQQRRRRIIIMTTTTNNKKSSRKVVVVAAAADDEEGGGG	1	AGG	R	K	752	292517	No	tRNA(CCU) appears to be arginine-type due to A20				0.71
GCA_009912175.1-AGG	1177982	B	GCA_009912175.1	Acidovorax wautersii	FALSE	FFLLSSSSYY**CC*WLLLLPPPPHHQQRRRRIIIMTTTTNNKKSSRRVVVVAAAADDEEGGGG	FFLLSSSSYY??CC?WLLLLPPPPHHQQRRRRIIIMTTTTNNKKSSRKVVVVAAAADDEEGGGG	1	AGG	R	K	186	451371	No	tRNA(CCU) appears to be arginine-type due to A20				0.68
GCA_900541385.1-AGG	1193532	B	GCA_900541385.1	uncultured Butyricicoccus sp.	FALSE	FFLLSSSSYY**CC*WLLLLPPPPHHQQRRRRIIIMTTTTNNKKSSRRVVVVAAAADDEEGGGG	FFLLSSSSYY??CC?WLLLLPPPPHHQQRRRRIIIMTTTTNNKKSSRKVVVVAAAADDEEGGGG	1	AGG	R	K	423	219454	No	No tRNA(CCU), Arg-type tRNA(UCU)				0.59
GCA_900555465.1-AGG	1193532	B	GCA_900555465.1	uncultured Butyricicoccus sp.	FALSE	FFLLSSSSYY**CC*WLLLLPPPPHHQQRRRRIIIMTTTTNNKKSSRRVVVVAAAADDEEGGGG	FFLLSSSSYY??CC?WLLLLPPPPHHQQRRRRIIIMTTTTNNKKSSRKVVVVAAAADDEEGGGG	1	AGG	R	K	285	219948	No	tRNA(CCU) appears to be arginine-type due to A20				0.6
GCA_900104265.1-AGG	1198456	B	GCA_900104265.1	Pseudomonas guguanensis	TRUE	FFLLSSSSYY**CC*WLLLLPPPPHHQQRRRRIIIMTTTTNNKKSSRRVVVVAAAADDEEGGGG	FFLLSSSSYY??CC?WLLLLPPPPHHQQRRRRIIIMTTTTNNKKSSRKVVVVAAAADDEEGGGG	1	AGG	R	K	736	592337	No	tRNA(CCU) appears to be arginine-type due to A20				0.64
GCA_000283075.1-AGG	1211114	B	GCA_000283075.1	Pseudoxanthomonas sp. GW2	TRUE	FFLLSSSSYY**CC*WLLLLPPPPHHQQRRRRIIIMTTTTNNKKSSRRVVVVAAAADDEEGGGG	FF?LSSSSYY??CC?WLLLLPPPPHHQQRRRRIIIMTTTTNNKKSS?KVVVVAAAADDEEGGGG	1	AGG	R	K	490	382267	No	tRNA(CCU) appears to be arginine-type due to A20				0.71
GCA_000292225.1-AGG	1217720	B	GCA_000292225.1	Roseomonas sp. B5	TRUE	FFLLSSSSYY**CC*WLLLLPPPPHHQQRRRRIIIMTTTTNNKKSSRRVVVVAAAADDEEGGGG	FFLLSSSSYY??CC?WLLLLPPPPHHQQRRRRIIIMTTTTNNKKSSRKVVVVAAAADDEEGGGG	1	AGG	R	K	869	458655	No	tRNA(CCU) appears to be arginine-type due to A20				0.71
GCA_000389805.1-AGG	1229514	B	GCA_000389805.1	Cupriavidus sp. GA3-3	TRUE	FFLLSSSSYY**CC*WLLLLPPPPHHQQRRRRIIIMTTTTNNKKSSRRVVVVAAAADDEEGGGG	FFLLSSSSYY??CC?WLLLLPPPPHHQQRRRRIIIMTTTTNNKKSSRKVVVVAAAADDEEGGGG	1	AGG	R	K	1304	713010	No	tRNA(CCU) appears to be arginine-type due to A20				0.67
GCA_000437175.1-AGG	1262954	B	GCA_000437175.1	Ruminococcus sp. CAG:330	TRUE	FFLLSSSSYY**CC*WLLLLPPPPHHQQRRRRIIIMTTTTNNKKSSRRVVVVAAAADDEEGGGG	FFLLSSSSYY??CC?WLLLLPPPPHHQQRRRRIIIMTTTTNNKKSSRKVVVVAAAADDEEGGGG	1	AGG	R	K	237	254535	No	tRNA(CCU) appears to be arginine-type due to A20				0.52
GCA_000432375.1-AGG	1262999	B	GCA_000432375.1	Firmicutes bacterium CAG:103	TRUE	FFLLSSSSYY**CC*WLLLLPPPPHHQQRRRRIIIMTTTTNNKKSSRRVVVVAAAADDEEGGGG	FFLLSSSSYY??CC?WLLLLPPPPHHQQRRRRIIIMTTTTNNKKSSRKVVVVAAAADDEEGGGG	1	AGG	R	K	126	204106	No	No tRNA(CCU), Arg-type tRNA(UCU)				0.62
GCA_000433195.1-AGG	1263003	B	GCA_000433195.1	Firmicutes bacterium CAG:129	TRUE	FFLLSSSSYY**CC*WLLLLPPPPHHQQRRRRIIIMTTTTNNKKSSRRVVVVAAAADDEEGGGG	FFLLSSSSYY??CC?WLLLLPPPPHHQQRRRRIIIMTTTTNNKKSSRKVVVVAAAADDEEGGGG	1	AGG	R	K	367	203375	No	tRNA(CCU) appears to be arginine-type due to A20				0.61
GCA_003814555.1-AGG	1273429	B	GCA_003814555.1	Vulcaniibacterium tengchongense	TRUE	FFLLSSSSYY**CC*WLLLLPPPPHHQQRRRRIIIMTTTTNNKKSSRRVVVVAAAADDEEGGGG	FF?L?SSSYY??CC?WLLLLPPPPHHQQRRRRIIIMTTTTNNKKSS?KVVVVAAAADDEEGGGG	1	AGG	R	K	387	332893	No	tRNA(CCU) appears to be arginine-type due to A20				0.72
GCA_008033455.1-AGG	1273429	B	GCA_008033455.1	Vulcaniibacterium tengchongense	FALSE	FFLLSSSSYY**CC*WLLLLPPPPHHQQRRRRIIIMTTTTNNKKSSRRVVVVAAAADDEEGGGG	FF?L?SSSYY??CC?WLLLLPPPPHHQQRRRRIIIMTTTTNNKKSS?KVVVVAAAADDEEGGGG	1	AGG	R	K	408	357876	No	tRNA(CCU) appears to be arginine-type due to A20				0.72
GCA_902859745.1-AGG	1287738	B	GCA_902859745.1	Achromobacter dolens	FALSE	FFLLSSSSYY**CC*WLLLLPPPPHHQQRRRRIIIMTTTTNNKKSSRRVVVVAAAADDEEGGGG	FFLLSSSSYY??CC?WLLLLPPPPHHQQRRRRIIIMTTTTNNKKSSRKVVVVAAAADDEEGGGG	1	AGG	R	K	535	656214	No	tRNA(CCU) appears to be arginine-type due to A20				0.68
GCA_902859975.1-AGG	1287738	B	GCA_902859975.1	Achromobacter dolens	FALSE	FFLLSSSSYY**CC*WLLLLPPPPHHQQRRRRIIIMTTTTNNKKSSRRVVVVAAAADDEEGGGG	FFLLSSSSYY??CC?WLLLLPPPPHHQQRRRRIIIMTTTTNNKKSSRKVVVVAAAADDEEGGGG	1	AGG	R	K	491	638889	No	tRNA(CCU) appears to be arginine-type due to A20				0.68
GCA_902860115.1-AGG	1287738	B	GCA_902860115.1	Achromobacter dolens	FALSE	FFLLSSSSYY**CC*WLLLLPPPPHHQQRRRRIIIMTTTTNNKKSSRRVVVVAAAADDEEGGGG	FFLLSSSSYY??CC?WLLLLPPPPHHQQRRRRIIIMTTTTNNKKSSRKVVVVAAAADDEEGGGG	1	AGG	R	K	505	635296	No	tRNA(CCU) appears to be arginine-type due to A20				0.68
GCA_000349845.1-AGG	1294143	B	GCA_000349845.1	Pseudomonas sp. ATCC 13867	TRUE	FFLLSSSSYY**CC*WLLLLPPPPHHQQRRRRIIIMTTTTNNKKSSRRVVVVAAAADDEEGGGG	FFLLSSSSYY??CC?WLLLLPPPPHHQQRRRRIIIMTTTTNNKKSSRKVVVVAAAADDEEGGGG	1	AGG	R	K	655	624074	No	tRNA(CCU) appears to be arginine-type due to A20				0.65
GCA_003788585.1-AGG	1304270	B	GCA_003788585.1	Salinisphaera japonica YTM-1	TRUE	FFLLSSSSYY**CC*WLLLLPPPPHHQQRRRRIIIMTTTTNNKKSSRRVVVVAAAADDEEGGGG	FFLLSSSSYY??CC?WLLLLPPPPHHQQRRRRIIIMTTTTNNKKSSRKVVVVAAAADDEEGGGG	1	AGG	R	K	164	362090	No	tRNA(CCU) appears to be arginine-type due to A20				0.63
GCA_001007995.1-AGG	1309411	B	GCA_001007995.1	Deinococcus soli Cha et al. 2016	TRUE	FFLLSSSSYY**CC*WLLLLPPPPHHQQRRRRIIIMTTTTNNKKSSRRVVVVAAAADDEEGGGG	FFLLSSSSYY??CC?WLLLLPPPPHHQQRRRRIIIMTTTTNNKKSS?KVVVVAAAADDEEGGGG	1	AGG	R	K	254	281880	No	tRNA(CCU) appears to be arginine-type due to A20				0.7
GCA_003256445.1-AGG	1310165	B	GCA_003256445.1	Ralstonia pseudosolanacearum	TRUE	FFLLSSSSYY**CC*WLLLLPPPPHHQQRRRRIIIMTTTTNNKKSSRRVVVVAAAADDEEGGGG	FFLLSSSSYY??CC?WLLLLPPPPHHQQRRRRIIIMTTTTNNKKSSRKVVVVAAAADDEEGGGG	1	AGG	R	K	741	545038	No	tRNA(CCU) appears to be arginine-type due to A20				0.67
GCA_003256405.1-AGG	1310165	B	GCA_003256405.1	Ralstonia pseudosolanacearum	FALSE	FFLLSSSSYY**CC*WLLLLPPPPHHQQRRRRIIIMTTTTNNKKSSRRVVVVAAAADDEEGGGG	FFLLSSSSYY??CC?WLLLLPPPPHHQQRRRRIIIMTTTTNNKKSSRKVVVVAAAADDEEGGGG	1	AGG	R	K	778	564410	No	tRNA(CCU) appears to be arginine-type due to A20				0.67
GCA_003595305.1-AGG	1310165	B	GCA_003595305.1	Ralstonia pseudosolanacearum	FALSE	FFLLSSSSYY**CC*WLLLLPPPPHHQQRRRRIIIMTTTTNNKKSSRRVVVVAAAADDEEGGGG	FFLLSSSSYY??CC?WLLLLPPPPHHQQRRRRIIIMTTTTNNKKSSRKVVVVAAAADDEEGGGG	1	AGG	R	K	744	550846	No	tRNA(CCU) appears to be arginine-type due to A20				0.67
GCA_008000395.1-AGG	1310165	B	GCA_008000395.1	Ralstonia pseudosolanacearum	FALSE	FFLLSSSSYY**CC*WLLLLPPPPHHQQRRRRIIIMTTTTNNKKSSRRVVVVAAAADDEEGGGG	FFLLSSSSYY??CC?WLLLLPPPPHHQQRRRRIIIMTTTTNNKKSSRKVVVVAAAADDEEGGGG	1	AGG	R	K	801	561672	No	tRNA(CCU) appears to be arginine-type due to A20				0.66
GCA_000395345.1-AGG	1312922	B	GCA_000395345.1	Cupriavidus sp. WS	TRUE	FFLLSSSSYY**CC*WLLLLPPPPHHQQRRRRIIIMTTTTNNKKSSRRVVVVAAAADDEEGGGG	FFLLSSSSYY??CC?WLLLLPPPPHHQQRRRRIIIMTTTTNNKKSSRKVVVVAAAADDEEGGGG	1	AGG	R	K	1545	857858	No	tRNA(CCU) appears to be arginine-type due to A20				0.69
GCA_011044775.1-AGG	1324935	B	GCA_011044775.1	Limisphaera ngatamarikiensis	TRUE	FFLLSSSSYY**CC*WLLLLPPPPHHQQRRRRIIIMTTTTNNKKSSRRVVVVAAAADDEEGGGG	FFLLSSSSYY??CC?WLLLLPPPPHHQQRRRRIIIMTTTTNNKKSSRKVVVVAAAADDEEGGGG	1	AGG	R	K	666	298799	No	tRNA(CCU) appears to be arginine-type due to A20				0.65
GCA_002631185.1-AGG	1335062	B	GCA_002631185.1	Roseomonas rhizosphaerae	TRUE	FFLLSSSSYY**CC*WLLLLPPPPHHQQRRRRIIIMTTTTNNKKSSRRVVVVAAAADDEEGGGG	FF?LSSSSYY??CC?WLLLLPPPPHHQQRRRRIIIMTTTTNNKKSS?KVVVVAAAADDEEGGGG	1	AGG	R	K	725	425648	No	tRNA(CCU) appears to be arginine-type due to A20				0.72
GCA_004792695.1-AGG	1344951	B	GCA_004792695.1	Sphingomonas naasensis	TRUE	FFLLSSSSYY**CC*WLLLLPPPPHHQQRRRRIIIMTTTTNNKKSSRRVVVVAAAADDEEGGGG	FFLLSSSSYY??CC?WLLLLPPPPHHQQRRRRIIIMTTTTNNKKSSRKVVVVAAAADDEEGGGG	1	AGG	R	K	521	387027	No	tRNA(CCU) appears to be arginine-type due to A20				0.68
GCA_011762145.1-AGG	1344951	B	GCA_011762145.1	Sphingomonas naasensis	FALSE	FFLLSSSSYY**CC*WLLLLPPPPHHQQRRRRIIIMTTTTNNKKSSRRVVVVAAAADDEEGGGG	FFLLSSSSYY??CC?WLLLLPPPPHHQQRRRRIIIMTTTTNNKKSSRKVVVVAAAADDEEGGGG	1	AGG	R	K	525	393510	No	tRNA(CCU) appears to be arginine-type due to A20				0.68
GCA_000688095.1-AGG	1380390	B	GCA_000688095.1	Solirubrobacterales bacterium URHD0059	TRUE	FFLLSSSSYY**CC*WLLLLPPPPHHQQRRRRIIIMTTTTNNKKSSRRVVVVAAAADDEEGGGG	FFLLSSSSYY??CC?WLLLLPPPPHHQQRRRRIIIMTTTTNNKKSSRKVVVVAAAADDEEGGGG	1	AGG	R	K	483	474423	No	tRNA(CCU) appears to be arginine-type due to A20				0.72
GCA_003663955.1-AGG	1381557	B	GCA_003663955.1	Sulfurisoma sediminicola	FALSE	FFLLSSSSYY**CC*WLLLLPPPPHHQQRRRRIIIMTTTTNNKKSSRRVVVVAAAADDEEGGGG	FFLLSSSSYY??CC?WLLLLPPPPHHQQRRRRIIIMTTTTNNKKSSRKVVVVAAAADDEEGGGG	1	AGG	R	K	757	334359	No	tRNA(CCU) appears to be arginine-type due to A20				0.66
GCA_000768335.1-AGG	1385522	B	GCA_000768335.1	Lysobacter arseniciresistens ZS79	TRUE	FFLLSSSSYY**CC*WLLLLPPPPHHQQRRRRIIIMTTTTNNKKSSRRVVVVAAAADDEEGGGG	FFLLSSSSYY??CC?WLLLLPPPPHHQQRRRRIIIMTTTTNNKKSSRKVVVVAAAADDEEGGGG	1	AGG	R	K	383	319958	No	tRNA(CCU) appears to be arginine-type due to A20				0.7
GCA_902859765.1-AGG	1389932	B	GCA_902859765.1	Achromobacter pulmonis	FALSE	FFLLSSSSYY**CC*WLLLLPPPPHHQQRRRRIIIMTTTTNNKKSSRRVVVVAAAADDEEGGGG	FFLLSSSSYY??CC?WLLLLPPPPHHQQRRRRIIIMTTTTNNKKSSRKVVVVAAAADDEEGGGG	1	AGG	R	K	454	601455	No	tRNA(CCU) appears to be arginine-type due to A20				0.67
GCA_900104805.1-AGG	1392877	B	GCA_900104805.1	Pseudomonas oryzae	TRUE	FFLLSSSSYY**CC*WLLLLPPPPHHQQRRRRIIIMTTTTNNKKSSRRVVVVAAAADDEEGGGG	FFLLSSSSYY??CC?WLLLLPPPPHHQQRRRRIIIMTTTTNNKKSSRKVVVVAAAADDEEGGGG	1	AGG	R	K	581	523471	No	tRNA(CCU) appears to be arginine-type due to A20				0.67
GCA_000505665.1-AGG	1394889	B	GCA_000505665.1	Thermosynechococcus sp. NK55a	TRUE	FFLLSSSSYY**CC*WLLLLPPPPHHQQRRRRIIIMTTTTNNKKSSRRVVVVAAAADDEEGGGG	FFLLSSSSYY??CC?WLLLLPPPPHHQQRRRRIIIMTTTTNNKKSS?KVVVVAAAADDEEGGGG	1	AGG	R	K	471	317308	No	tRNA(CCU) appears to be arginine-type due to A20				0.54
GCA_011067135.1-AGG	1396819	B	GCA_011067135.1	Solimonas terrae	TRUE	FFLLSSSSYY**CC*WLLLLPPPPHHQQRRRRIIIMTTTTNNKKSSRRVVVVAAAADDEEGGGG	FFLLSSSSYY??CC?WLLLLPPPPHHQQRRRRIIIMTTTTNNKKSSRKVVVVAAAADDEEGGGG	1	AGG	R	K	676	443830	No	tRNA(CCU) appears to be arginine-type due to A20				0.66
GCA_000584995.1-AGG	1454000	B	GCA_000584995.1	Candidatus Accumulibacter sp. SK-11	TRUE	FFLLSSSSYY**CC*WLLLLPPPPHHQQRRRRIIIMTTTTNNKKSSRRVVVVAAAADDEEGGGG	FFLLSSSSYY??CC?WLLLLPPPPHHQQRRRRIIIMTTTTNNKKSSRKVVVVAAAADDEEGGGG	1	AGG	R	K	1374	398948	No	No tRNA(CCU), Arg-type tRNA(UCU)				0.66
GCA_000585015.1-AGG	1454001	B	GCA_000585015.1	Candidatus Accumulibacter sp. SK-12	TRUE	FFLLSSSSYY**CC*WLLLLPPPPHHQQRRRRIIIMTTTTNNKKSSRRVVVVAAAADDEEGGGG	FFLLSSSSYY??CC?WLLLLPPPPHHQQRRRRIIIMTTTTNNKKSSRKVVVVAAAADDEEGGGG	1	AGG	R	K	1255	418846	No	No tRNA(CCU), Arg-type tRNA(UCU)				0.66
GCA_000585035.2-AGG	1454002	B	GCA_000585035.2	Candidatus Accumulibacter sp. BA-91	TRUE	FFLLSSSSYY**CC*WLLLLPPPPHHQQRRRRIIIMTTTTNNKKSSRRVVVVAAAADDEEGGGG	FFLLSSSSYY??CC?WLLLLPPPPHHQQRRRRIIIMTTTTNNKKSSRKVVVVAAAADDEEGGGG	1	AGG	R	K	1438	440101	No	tRNA(CCU) appears to be arginine-type due to A20				0.62
GCA_000585095.1-AGG	1454005	B	GCA_000585095.1	Candidatus Accumulibacter sp. BA-94	TRUE	FFLLSSSSYY**CC*WLLLLPPPPHHQQRRRRIIIMTTTTNNKKSSRRVVVVAAAADDEEGGGG	FFLLSSSSYY??CC?WLLLLPPPPHHQQRRRRIIIMTTTTNNKKSSRKVVVVAAAADDEEGGGG	1	AGG	R	K	1069	346281	Missing	No tRNA(CCU) or tRNA(UCU)				0.65
GCA_000584955.2-AGG	1457154	B	GCA_000584955.2	Candidatus Accumulibacter sp. SK-01	TRUE	FFLLSSSSYY**CC*WLLLLPPPPHHQQRRRRIIIMTTTTNNKKSSRRVVVVAAAADDEEGGGG	FFLLSSSSYY??CC?WLLLLPPPPHHQQRRRRIIIMTTTTNNKKSSRKVVVVAAAADDEEGGGG	1	AGG	R	K	1321	426994	No	tRNA(CCU) appears to be arginine-type due to A20				0.62
GCA_000632045.1-AGG	1470590	B	GCA_000632045.1	Stenotrophomonas sp. RIT309	TRUE	FFLLSSSSYY**CC*WLLLLPPPPHHQQRRRRIIIMTTTTNNKKSSRRVVVVAAAADDEEGGGG	FFLLSSSSYY??CC?WLLLLPPPPHHQQRRRRIIIMTTTTNNKKSSRKVVVVAAAADDEEGGGG	1	AGG	R	K	311	461788	No	tRNA(CCU) appears to be arginine-type due to A20				0.66
GCA_000953855.3-AGG	1475481	B	GCA_000953855.3	Mizugakiibacter sediminis	TRUE	FFLLSSSSYY**CC*WLLLLPPPPHHQQRRRRIIIMTTTTNNKKSSRRVVVVAAAADDEEGGGG	FF?LSSSSYY??CC?WLLLLPPPPHHQQRRRRIIIMTTTTNNKKSSRKVVVVAAAADDEEGGGG	1	AGG	R	K	386	318124	No	tRNA(CCU) appears to be arginine-type due to A20				0.71
GCA_000599865.1-AGG	1476583	B	GCA_000599865.1	Deinococcus phoenicis	TRUE	FFLLSSSSYY**CC*WLLLLPPPPHHQQRRRRIIIMTTTTNNKKSSRRVVVVAAAADDEEGGGG	FFLLSSSSYY??CC?WLLLLPPPPHHQQRRRRIIIMTTTTNNKKSSRKVVVVAAAADDEEGGGG	1	AGG	R	K	546	323114	No	tRNA(CCU) appears to be arginine-type due to A20				0.69
GCA_004761865.1-AGG	1485588	B	GCA_004761865.1	Crenalkalicoccus roseus	TRUE	FFLLSSSSYY**CC*WLLLLPPPPHHQQRRRRIIIMTTTTNNKKSSRRVVVVAAAADDEEGGGG	FF?LSSSSYY??CC?WLLLLPPPPHHQQRRRRIIIMTTTTNNKKSS?KVVVVAAAADDEEGGGG	1	AGG	R	K	1088	400834	No	tRNA(CCU) appears to be arginine-type due to A20				0.74
GCA_002720475.1-AGG	1486281	B	GCA_002720475.1	Roseovarius sp.	FALSE	FFLLSSSSYY**CC*WLLLLPPPPHHQQRRRRIIIMTTTTNNKKSSRRVVVVAAAADDEEGGGG	FFLLSSSSYY??CC?WLLLLPPPPHHQQRRRRIIIMTTTTNNKKSSRKVVVVAAAADDEEGGGG	1	AGG	R	K	637	272016	No	No tRNA(CCU), Arg-type tRNA(UCU)				0.67
GCA_900187885.1-AGG	1495650	B	GCA_900187885.1	Thermoflexus hugenholtzii JAD2	TRUE	FFLLSSSSYY**CC*WLLLLPPPPHHQQRRRRIIIMTTTTNNKKSSRRVVVVAAAADDEEGGGG	FFLLSSSSYY??CC?WLLLLPPPPHHQQRRRRIIIMTTTTNNKKSSRKVVVVAAAADDEEGGGG	1	AGG	R	K	254	300232	No	tRNA(CCU) appears to be arginine-type due to A20				0.67
GCA_900541595.1-AGG	1500547	B	GCA_900541595.1	uncultured Succiniclasticum sp.	FALSE	FFLLSSSSYY**CC*WLLLLPPPPHHQQRRRRIIIMTTTTNNKKSSRRVVVVAAAADDEEGGGG	FFLLSSSSYY??CC?WLLLLPPPPHHQQRRRRIIIMTTTTNNKKSSRKVVVVAAAADDEEGGGG	1	AGG	R	K	504	247403	No	tRNA(CCU) appears to be arginine-type due to A20				0.59
GCA_000725445.1-AGG	1502784	B	GCA_000725445.1	Pseudomonas sp. AAC	TRUE	FFLLSSSSYY**CC*WLLLLPPPPHHQQRRRRIIIMTTTTNNKKSSRRVVVVAAAADDEEGGGG	FFLLSSSSYY??CC?WLLLLPPPPHHQQRRRRIIIMTTTTNNKKSSRKVVVVAAAADDEEGGGG	1	AGG	R	K	809	737733	No	tRNA(CCU) appears to be arginine-type due to A20				0.67
GCA_001523845.1-AGG	1503054	B	GCA_001523845.1	Burkholderia stagnalis	FALSE	FFLLSSSSYY**CC*WLLLLPPPPHHQQRRRRIIIMTTTTNNKKSSRRVVVVAAAADDEEGGGG	FFLLSSSSYY??CC?WLLLLPPPPHHQQRRRRIIIMTTTTNNKKSSRKVVVVAAAADDEEGGGG	1	AGG	R	K	573	710466	No	tRNA(CCU) appears to be arginine-type due to A20				0.67
GCA_010211755.1-AGG	1503750	B	GCA_010211755.1	Pseudoxanthomonas sangjuensis	TRUE	FFLLSSSSYY**CC*WLLLLPPPPHHQQRRRRIIIMTTTTNNKKSSRRVVVVAAAADDEEGGGG	FFLLSSSSYY??CC?WLLLLPPPPHHQQRRRRIIIMTTTTNNKKSSRKVVVVAAAADDEEGGGG	1	AGG	R	K	743	342375	No	tRNA(CCU) appears to be arginine-type due to A20				0.69
GCA_009834985.1-AGG	1507289	B	GCA_009834985.1	Deinococcus xianganensis	TRUE	FFLLSSSSYY**CC*WLLLLPPPPHHQQRRRRIIIMTTTTNNKKSSRRVVVVAAAADDEEGGGG	FFLLSSSSYY??CC?WLLLLPPPPHHQQRRRRIIIMTTTTNNKKSSRKVVVVAAAADDEEGGGG	1	AGG	R	K	348	342379	No	tRNA(CCU) appears to be arginine-type due to A20				0.7
GCA_900115505.1-AGG	1523247	B	GCA_900115505.1	Geodermatophilus dictyosporus	TRUE	FFLLSSSSYY**CC*WLLLLPPPPHHQQRRRRIIIMTTTTNNKKSSRRVVVVAAAADDEEGGGG	FF?L?SSSYY??CC?WLLLLPPPPHHQQRRRRII?MTTTTNNKKSS?KVVVVAAAADDEEGGGG	1	AGG	R	K	328	339846	No	tRNA(CCU) appears to be arginine-type due to A20				0.76
GCA_001295775.1-AGG	1523428	B	GCA_001295775.1	beta proteobacterium AAP99	TRUE	FFLLSSSSYY**CC*WLLLLPPPPHHQQRRRRIIIMTTTTNNKKSSRRVVVVAAAADDEEGGGG	FFLLSSSSYY??CC?WLLLLPPPPHHQQRRRRIIIMTTTTNNKKSSRKVVVVAAAADDEEGGGG	1	AGG	R	K	284	372021	No	tRNA(CCU) appears to be arginine-type due to A20				0.65
GCA_001669755.1-AGG	1524461	B	GCA_001669755.1	Pseudomonas sp. EGD-AKN5	TRUE	FFLLSSSSYY**CC*WLLLLPPPPHHQQRRRRIIIMTTTTNNKKSSRRVVVVAAAADDEEGGGG	FFLLSSSSYY??CC?WLLLLPPPPHHQQRRRRIIIMTTTTNNKKSSRKVVVVAAAADDEEGGGG	1	AGG	R	K	832	737391	No	tRNA(CCU) appears to be arginine-type due to A20				0.67
GCA_001617435.1-AGG	1524462	B	GCA_001617435.1	Rhodanobacter sp. FW510-R10	TRUE	FFLLSSSSYY**CC*WLLLLPPPPHHQQRRRRIIIMTTTTNNKKSSRRVVVVAAAADDEEGGGG	FFLLSSSSYY??CC?WLLLLPPPPHHQQRRRRIIIMTTTTNNKKSS?KVVVVAAAADDEEGGGG	1	AGG	R	K	521	388960	No	tRNA(CCU) appears to be arginine-type due to A20				0.68
GCA_001617375.1-AGG	1524463	B	GCA_001617375.1	Rhodanobacter sp. FW510-T8	TRUE	FFLLSSSSYY**CC*WLLLLPPPPHHQQRRRRIIIMTTTTNNKKSSRRVVVVAAAADDEEGGGG	FFLLSSSSYY??CC?WLLLLPPPPHHQQRRRRIIIMTTTTNNKKSS?KVVVVAAAADDEEGGGG	1	AGG	R	K	500	378596	No	tRNA(CCU) appears to be arginine-type due to A20				0.68
GCA_001617365.1-AGG	1524464	B	GCA_001617365.1	Rhodanobacter sp. FW104-R8	TRUE	FFLLSSSSYY**CC*WLLLLPPPPHHQQRRRRIIIMTTTTNNKKSSRRVVVVAAAADDEEGGGG	FFLLSSSSYY??CC?WLLLLPPPPHHQQRRRRIIIMTTTTNNKKSS?KVVVVAAAADDEEGGGG	1	AGG	R	K	504	379327	No	tRNA(CCU) appears to be arginine-type due to A20				0.68
GCA_001617445.1-AGG	1524468	B	GCA_001617445.1	Rhodanobacter sp. FW104-R5	TRUE	FFLLSSSSYY**CC*WLLLLPPPPHHQQRRRRIIIMTTTTNNKKSSRRVVVVAAAADDEEGGGG	FFLLSSSSYY??CC?WLLLLPPPPHHQQRRRRIIIMTTTTNNKKSSRKVVVVAAAADDEEGGGG	1	AGG	R	K	1115	852444	No	No tRNA(CCU), Arg-type tRNA(UCU)				0.68
GCA_008124535.1-AGG	1528104	B	GCA_008124535.1	Geodermatophilus sp. DSM 44513	TRUE	FFLLSSSSYY**CC*WLLLLPPPPHHQQRRRRIIIMTTTTNNKKSSRRVVVVAAAADDEEGGGG	FF?LSSSSYY??CC?WLLLLPPPPHHQQRRRRIIIMTTTTNNKKSS?KVVVVAAAADDEEGGGG	1	AGG	R	K	250	348093	No	tRNA(CCU) appears to be arginine-type due to A20				0.75
GCA_000745175.1-AGG	1540221	B	GCA_000745175.1	Deinococcus sp. YIM 77859	TRUE	FFLLSSSSYY**CC*WLLLLPPPPHHQQRRRRIIIMTTTTNNKKSSRRVVVVAAAADDEEGGGG	FFLLSSSSYY??CC?WLLLLPPPPHHQQRRRRIIIMTTTTNNKKSSRKVVVVAAAADDEEGGGG	1	AGG	R	K	588	317684	No	tRNA(CCU) appears to be arginine-type due to A20				0.67
GCA_011051715.1-AGG	1543721	B	GCA_011051715.1	Sedimenticola thiotaurini	FALSE	FFLLSSSSYY**CC*WLLLLPPPPHHQQRRRRIIIMTTTTNNKKSSRRVVVVAAAADDEEGGGG	FFLLSSSSYY??CC?WLLLLPPPPHHQQRRRRIIIMTTTTNNKKSSRKVVVVAAAADDEEGGGG	1	AGG	R	K	1257	397591	No	tRNA(CCU) appears to be arginine-type due to A20				0.67
GCA_003243195.1-AGG	1549858	B	GCA_003243195.1	Sphingomonas taxi	FALSE	FFLLSSSSYY**CC*WLLLLPPPPHHQQRRRRIIIMTTTTNNKKSSRRVVVVAAAADDEEGGGG	FFLLSSSSYY??CC?WLLLLPPPPHHQQRRRRIIIMTTTTNNKKSS?KVVVVAAAADDEEGGGG	1	AGG	R	K	352	327537	No	tRNA(CCU) appears to be arginine-type due to A20				0.7
GCA_004217315.1-AGG	1550736	B	GCA_004217315.1	Corticibacter populi	TRUE	FFLLSSSSYY**CC*WLLLLPPPPHHQQRRRRIIIMTTTTNNKKSSRRVVVVAAAADDEEGGGG	FFLLSSSSYY??CC?WLLLLPPPPHHQQRRRRIIIMTTTTNNKKSSRKVVVVAAAADDEEGGGG	1	AGG	R	K	561	423382	No	tRNA(CCU) appears to be arginine-type due to A20				0.65
GCA_003703815.1-AGG	1550736	B	GCA_003703815.1	Corticibacter populi	FALSE	FFLLSSSSYY**CC*WLLLLPPPPHHQQRRRRIIIMTTTTNNKKSSRRVVVVAAAADDEEGGGG	FFLLSSSSYY??CC?WLLLLPPPPHHQQRRRRIIIMTTTTNNKKSSRKVVVVAAAADDEEGGGG	1	AGG	R	K	543	418234	No	tRNA(CCU) appears to be arginine-type due to A20				0.65
GCA_900215145.1-AGG	1564158	B	GCA_900215145.1	Geodermatophilus sabuli	TRUE	FFLLSSSSYY**CC*WLLLLPPPPHHQQRRRRIIIMTTTTNNKKSSRRVVVVAAAADDEEGGGG	FF?LSSSSYY??CC?WLLLLPPPPHHQQRRRRIIIMTTTTNNKKSS?KVVVVAAAADDEEGGGG	1	AGG	R	K	445	409987	No	tRNA(CCU) appears to be arginine-type due to A20				0.74
GCA_900188375.1-AGG	1564159	B	GCA_900188375.1	Geodermatophilus pulveris	TRUE	FFLLSSSSYY**CC*WLLLLPPPPHHQQRRRRIIIMTTTTNNKKSSRRVVVVAAAADDEEGGGG	FF?LSSSSYY??CC?WLLLLPPPPHHQQRRRRII?MTTTTNNKKSS?KVVVVAAAADDEEGGGG	1	AGG	R	K	281	318914	No	tRNA(CCU) appears to be arginine-type due to A20				0.76
GCA_000974645.1-AGG	1603291	B	GCA_000974645.1	Alicycliphilus sp. B1	TRUE	FFLLSSSSYY**CC*WLLLLPPPPHHQQRRRRIIIMTTTTNNKKSSRRVVVVAAAADDEEGGGG	FFLLSSSSYY??CC?WLLLLPPPPHHQQRRRRIIIMTTTTNNKKSSRKVVVVAAAADDEEGGGG	1	AGG	R	K	1698	743628	No	tRNA(CCU) appears to be arginine-type due to A20				0.67
GCA_001838695.1-AGG	1608908	B	GCA_001838695.1	Pseudomonas sp. HMSC75E02	TRUE	FFLLSSSSYY**CC*WLLLLPPPPHHQQRRRRIIIMTTTTNNKKSSRRVVVVAAAADDEEGGGG	FFLLSSSSYY??CC?WLLLLPPPPHHQQRRRRIIIMTTTTNNKKSSRKVVVVAAAADDEEGGGG	1	AGG	R	K	820	757291	No	tRNA(CCU) appears to be arginine-type due to A20				0.67
GCA_003240755.1-AGG	1609977	B	GCA_003240755.1	Sphingomonas hengshuiensis	FALSE	FFLLSSSSYY**CC*WLLLLPPPPHHQQRRRRIIIMTTTTNNKKSSRRVVVVAAAADDEEGGGG	FFLLSSSSYY??CC?WLLLLPPPPHHQQRRRRIIIMTTTTNNKKSSRKVVVVAAAADDEEGGGG	1	AGG	R	K	685	337929	No	tRNA(CCU) appears to be arginine-type due to A20				0.68
GCA_002355735.1-AGG	1620215	B	GCA_002355735.1	Sulfuricaulis limicola	TRUE	FFLLSSSSYY**CC*WLLLLPPPPHHQQRRRRIIIMTTTTNNKKSSRRVVVVAAAADDEEGGGG	FFLLSSSSYY??CC?WLLLLPPPPHHQQRRRRIIIMTTTTNNKKSSRKVVVVAAAADDEEGGGG	1	AGG	R	K	560	320189	No	tRNA(CCU) appears to be arginine-type due to A20				0.61
GCA_001636105.1-AGG	1636425	B	GCA_001636105.1	Burkholderia sp. MSMB1589WGS	TRUE	FFLLSSSSYY**CC*WLLLLPPPPHHQQRRRRIIIMTTTTNNKKSSRRVVVVAAAADDEEGGGG	FFLLSSSSYY??CC?WLLLLPPPPHHQQRRRRIIIMTTTTNNKKSSRKVVVVAAAADDEEGGGG	1	AGG	R	K	828	609416	No	tRNA(CCU) appears to be arginine-type due to A20				0.67
GCA_001725765.1-AGG	1660135	B	GCA_001725765.1	Rhodanobacter sp. SCN 66-43	TRUE	FFLLSSSSYY**CC*WLLLLPPPPHHQQRRRRIIIMTTTTNNKKSSRRVVVVAAAADDEEGGGG	FFLLSSSSYY??CC?WLLLLPPPPHHQQRRRRIIIMTTTTNNKKSSRKVVVVAAAADDEEGGGG	1	AGG	R	K	770	348693	No	tRNA(CCU) appears to be arginine-type due to A20				0.66
GCA_001725465.1-AGG	1660136	B	GCA_001725465.1	Rhodanobacter sp. SCN 69-32	TRUE	FFLLSSSSYY**CC*WLLLLPPPPHHQQRRRRIIIMTTTTNNKKSSRRVVVVAAAADDEEGGGG	FF?LSSSSYY??CC?WLLLLPPPPHHQQRRRRIIIMTTTTNNKKSS?KVVVVAAAADDEEGGGG	1	AGG	R	K	530	349653	No	tRNA(CCU) appears to be arginine-type due to A20				0.69
GCA_001724995.1-AGG	1660138	B	GCA_001724995.1	Rubrivivax sp. SCN 71-131	TRUE	FFLLSSSSYY**CC*WLLLLPPPPHHQQRRRRIIIMTTTTNNKKSSRRVVVVAAAADDEEGGGG	FF?LSSSSYY??CC?WLLLLPPPPHHQQRRRRIIIMTTTTNNKKSSRKVVVVAAAADDEEGGGG	1	AGG	R	K	577	378640	No	tRNA(CCU) appears to be arginine-type due to A20				0.71
GCA_001725505.1-AGG	1660139	B	GCA_001725505.1	Rubrivivax sp. SCN 70-15	TRUE	FFLLSSSSYY**CC*WLLLLPPPPHHQQRRRRIIIMTTTTNNKKSSRRVVVVAAAADDEEGGGG	FFLLSSSSYY??CC?WLLLLPPPPHHQQRRRRIIIMTTTTNNKKSSRKVVVVAAAADDEEGGGG	1	AGG	R	K	760	470934	No	tRNA(CCU) appears to be arginine-type due to A20				0.7
GCA_001725535.1-AGG	1660143	B	GCA_001725535.1	Thiobacillus sp. SCN 64-317	TRUE	FFLLSSSSYY**CC*WLLLLPPPPHHQQRRRRIIIMTTTTNNKKSSRRVVVVAAAADDEEGGGG	FFLLSSSSYY??CC?WLLLLPPPPHHQQRRRRIIIMTTTTNNKKSSRKVVVVAAAADDEEGGGG	1	AGG	R	K	789	330459	No	tRNA(CCU) appears to be arginine-type due to A20				0.64
GCA_001725525.1-AGG	1660144	B	GCA_001725525.1	Thiobacillus sp. SCN 65-179	TRUE	FFLLSSSSYY**CC*WLLLLPPPPHHQQRRRRIIIMTTTTNNKKSSRRVVVVAAAADDEEGGGG	FFLLSSSSYY??CC?WLLLLPPPPHHQQRRRRIIIMTTTTNNKKSSRKVVVVAAAADDEEGGGG	1	AGG	R	K	536	359143	No	tRNA(CCU) appears to be arginine-type due to A20				0.65
GCA_001724275.1-AGG	1660163	B	GCA_001724275.1	Gemmatimonadetes bacterium SCN 70-22	TRUE	FFLLSSSSYY**CC*WLLLLPPPPHHQQRRRRIIIMTTTTNNKKSSRRVVVVAAAADDEEGGGG	FFLLSSSSYY??CC?WLLLLPPPPHHQQRRRRIIIMTTTTNNKKSS?KVVVVAAAADDEEGGGG	1	AGG	R	K	741	377167	No	tRNA(CCU) appears to be arginine-type due to A20				0.7
GCA_001725155.1-AGG	1660169	B	GCA_001725155.1	Xanthomonadaceae bacterium SCN 69-320	TRUE	FFLLSSSSYY**CC*WLLLLPPPPHHQQRRRRIIIMTTTTNNKKSSRRVVVVAAAADDEEGGGG	FFLLSSSSYY??CC?WLLLLPPPPHHQQRRRRIIIMTTTTNNKKSSRKVVVVAAAADDEEGGGG	1	AGG	R	K	365	425997	No	tRNA(CCU) appears to be arginine-type due to A20				0.69
GCA_001725645.1-AGG	1660170	B	GCA_001725645.1	Xanthomonadaceae bacterium SCN 69-123	TRUE	FFLLSSSSYY**CC*WLLLLPPPPHHQQRRRRIIIMTTTTNNKKSSRRVVVVAAAADDEEGGGG	FFLLSSSSYY??CC?WLLLLPPPPHHQQRRRRIIIMTTTTNNKKSSRKVVVVAAAADDEEGGGG	1	AGG	R	K	988	774613	No	tRNA(CCU) appears to be arginine-type due to A20				0.69
GCA_001725175.1-AGG	1660171	B	GCA_001725175.1	Xanthomonadaceae bacterium SCN 69-48	TRUE	FFLLSSSSYY**CC*WLLLLPPPPHHQQRRRRIIIMTTTTNNKKSSRRVVVVAAAADDEEGGGG	FFLLSSSSYY??CC?WLLLLPPPPHHQQRRRRIIIMTTTTNNKKSSRKVVVVAAAADDEEGGGG	1	AGG	R	K	645	410740	No	tRNA(CCU) appears to be arginine-type due to A20				0.69
GCA_001725595.1-AGG	1660172	B	GCA_001725595.1	Xanthomonadaceae bacterium SCN 69-25	TRUE	FFLLSSSSYY**CC*WLLLLPPPPHHQQRRRRIIIMTTTTNNKKSSRRVVVVAAAADDEEGGGG	FFLLSSSSYY??CC?WLLLLPPPPHHQQRRRRIIIMTTTTNNKKSSRKVVVVAAAADDEEGGGG	1	AGG	R	K	363	433767	No	tRNA(CCU) appears to be arginine-type due to A20				0.69
GCA_001603055.1-AGG	1674903	B	GCA_001603055.1	Victivallales bacterium Lenti_02	TRUE	FFLLSSSSYY**CC*WLLLLPPPPHHQQRRRRIIIMTTTTNNKKSSRRVVVVAAAADDEEGGGG	FFLLSSSSYY??CC?WLLLLPPPPHHQQRRRRIIIMTTTTNNKKSSRKVVVVAAAADDEEGGGG	1	AGG	R	K	396	357575	No	tRNA(CCU) appears to be arginine-type due to A20				0.67
GCA_003574465.1-AGG	1697972	B	GCA_003574465.1	Methylobacterium crusticola	TRUE	FFLLSSSSYY**CC*WLLLLPPPPHHQQRRRRIIIMTTTTNNKKSSRRVVVVAAAADDEEGGGG	FFLLSSSSYY??CC?WLLLLPPPPHHQQRRRRIIIMTTTTNNKKSSRKVVVVAAAADDEEGGGG	1	AGG	R	K	1268	670559	No	No tRNA(CCU), Arg-type tRNA(UCU)				0.73
GCA_001304215.1-AGG	1703384	B	GCA_001304215.1	Acidithiobacillales bacterium SM1_46	TRUE	FFLLSSSSYY**CC*WLLLLPPPPHHQQRRRRIIIMTTTTNNKKSSRRVVVVAAAADDEEGGGG	FFLLSSSSYY??CC?WLLLLPPPPHHQQRRRRIIIMTTTTNNKKSSRKVVVVAAAADDEEGGGG	1	AGG	R	K	566	308737	No	No tRNA(CCU), Arg-type tRNA(UCU)				0.62
GCA_001413985.2-AGG	1704277	B	GCA_001413985.2	Deinococcus sp. UR1	TRUE	FFLLSSSSYY**CC*WLLLLPPPPHHQQRRRRIIIMTTTTNNKKSSRRVVVVAAAADDEEGGGG	FFLLSSSSYY??CC?WLLLLPPPPHHQQRRRRIIIMTTTTNNKKSSRKVVVVAAAADDEEGGGG	1	AGG	R	K	288	331906	No	tRNA(CCU) appears to be arginine-type due to A20				0.69
GCA_900018785.1-AGG	1720302	B	GCA_900018785.1	Xanthomonas massiliensis	TRUE	FFLLSSSSYY**CC*WLLLLPPPPHHQQRRRRIIIMTTTTNNKKSSRRVVVVAAAADDEEGGGG	FFLLSSSSYY??CC?WLLLLPPPPHHQQRRRRIIIMTTTTNNKKSSRKVVVVAAAADDEEGGGG	1	AGG	R	K	375	353964	No	tRNA(CCU) appears to be arginine-type due to A20				0.71
GCA_902375895.1-AGG	1720302	B	GCA_902375895.1	Xanthomonas massiliensis	FALSE	FFLLSSSSYY**CC*WLLLLPPPPHHQQRRRRIIIMTTTTNNKKSSRRVVVVAAAADDEEGGGG	FFLLSSSSYY??CC?WLLLLPPPPHHQQRRRRIIIMTTTTNNKKSSRKVVVVAAAADDEEGGGG	1	AGG	R	K	375	353964	No	tRNA(CCU) appears to be arginine-type due to A20				0.71
GCA_001421155.1-AGG	1735671	B	GCA_001421155.1	Sphingomonas sp. Leaf5	TRUE	FFLLSSSSYY**CC*WLLLLPPPPHHQQRRRRIIIMTTTTNNKKSSRRVVVVAAAADDEEGGGG	FFLLSSSSYY??CC?WLLLLPPPPHHQQRRRRIIIMTTTTNNKKSSRKVVVVAAAADDEEGGGG	1	AGG	R	K	273	378320	No	tRNA(CCU) appears to be arginine-type due to A20				0.66
GCA_001421705.1-AGG	1735686	B	GCA_001421705.1	Xylophilus sp. Leaf220	TRUE	FFLLSSSSYY**CC*WLLLLPPPPHHQQRRRRIIIMTTTTNNKKSSRRVVVVAAAADDEEGGGG	FFLLSSSSYY??CC?WLLLLPPPPHHQQRRRRIIIMTTTTNNKKSSRKVVVVAAAADDEEGGGG	1	AGG	R	K	378	447407	No	tRNA(CCU) appears to be arginine-type due to A20				0.69
GCA_001421605.1-AGG	1735690	B	GCA_001421605.1	Sphingomonas sp. Leaf24	TRUE	FFLLSSSSYY**CC*WLLLLPPPPHHQQRRRRIIIMTTTTNNKKSSRRVVVVAAAADDEEGGGG	FFLLSSSSYY??CC?WLLLLPPPPHHQQRRRRIIIMTTTTNNKKSSRKVVVVAAAADDEEGGGG	1	AGG	R	K	274	379350	No	tRNA(CCU) appears to be arginine-type due to A20				0.66
GCA_001422025.1-AGG	1736233	B	GCA_001422025.1	Stenotrophomonas sp. Leaf70	TRUE	FFLLSSSSYY**CC*WLLLLPPPPHHQQRRRRIIIMTTTTNNKKSSRRVVVVAAAADDEEGGGG	FFLLSSSSYY??CC?WLLLLPPPPHHQQRRRRIIIMTTTTNNKKSSRKVVVVAAAADDEEGGGG	1	AGG	R	K	611	402317	No	tRNA(CCU) appears to be arginine-type due to A20				0.69
GCA_001423125.1-AGG	1736266	B	GCA_001423125.1	Duganella sp. Leaf126	TRUE	FFLLSSSSYY**CC*WLLLLPPPPHHQQRRRRIIIMTTTTNNKKSSRRVVVVAAAADDEEGGGG	FFLLSSSSYY??CC?WLLLLPPPPHHQQRRRRIIIMTTTTNNKKSSRKVVVVAAAADDEEGGGG	1	AGG	R	K	675	533145	No	tRNA(CCU) appears to be arginine-type due to A20				0.65
GCA_001422365.1-AGG	1736315	B	GCA_001422365.1	Pseudorhodoferax sp. Leaf265	TRUE	FFLLSSSSYY**CC*WLLLLPPPPHHQQRRRRIIIMTTTTNNKKSSRRVVVVAAAADDEEGGGG	FFLLSSSSYY??CC?WLLLLPPPPHHQQRRRRIIIMTTTTNNKKSSRKVVVVAAAADDEEGGGG	1	AGG	R	K	790	725520	No	tRNA(CCU) appears to be arginine-type due to A20				0.69
GCA_001422405.1-AGG	1736316	B	GCA_001422405.1	Pseudorhodoferax sp. Leaf267	TRUE	FFLLSSSSYY**CC*WLLLLPPPPHHQQRRRRIIIMTTTTNNKKSSRRVVVVAAAADDEEGGGG	FFLLSSSSYY??CC?WLLLLPPPPHHQQRRRRIIIMTTTTNNKKSSRKVVVVAAAADDEEGGGG	1	AGG	R	K	717	611241	No	tRNA(CCU) appears to be arginine-type due to A20				0.69
GCA_001422445.1-AGG	1736318	B	GCA_001422445.1	Pseudorhodoferax sp. Leaf274	TRUE	FFLLSSSSYY**CC*WLLLLPPPPHHQQRRRRIIIMTTTTNNKKSSRRVVVVAAAADDEEGGGG	FFLLSSSSYY??CC?WLLLLPPPPHHQQRRRRIIIMTTTTNNKKSSRKVVVVAAAADDEEGGGG	1	AGG	R	K	723	635798	No	tRNA(CCU) appears to be arginine-type due to A20				0.7
GCA_001424545.1-AGG	1736365	B	GCA_001424545.1	Ramlibacter sp. Leaf400	TRUE	FFLLSSSSYY**CC*WLLLLPPPPHHQQRRRRIIIMTTTTNNKKSSRRVVVVAAAADDEEGGGG	FFLLSSSSYY??CC?WLLLLPPPPHHQQRRRRIIIMTTTTNNKKSSRKVVVVAAAADDEEGGGG	1	AGG	R	K	669	459652	No	tRNA(CCU) appears to be arginine-type due to A20				0.7
GCA_001425575.1-AGG	1736378	B	GCA_001425575.1	Aurantimonas sp. Leaf443	TRUE	FFLLSSSSYY**CC*WLLLLPPPPHHQQRRRRIIIMTTTTNNKKSSRRVVVVAAAADDEEGGGG	FF?LSSSSYY??CC?WLLLLPPPPHHQQRRRRIIIMTTTTNNKKSSRKVVVVAAAADDEEGGGG	1	AGG	R	K	568	384039	No	tRNA(CCU) appears to be arginine-type due to A20				0.7
GCA_001428385.1-AGG	1736406	B	GCA_001428385.1	Rhodanobacter sp. Soil772	TRUE	FFLLSSSSYY**CC*WLLLLPPPPHHQQRRRRIIIMTTTTNNKKSSRRVVVVAAAADDEEGGGG	FFLLSSSSYY??CC?WLLLLPPPPHHQQRRRRIIIMTTTTNNKKSS?KVVVVAAAADDEEGGGG	1	AGG	R	K	316	364412	No	tRNA(CCU) appears to be arginine-type due to A20				0.67
GCA_001428405.1-AGG	1736407	B	GCA_001428405.1	Frateuria sp. Soil773	TRUE	FFLLSSSSYY**CC*WLLLLPPPPHHQQRRRRIIIMTTTTNNKKSSRRVVVVAAAADDEEGGGG	FFLLSSSSYY??CC?WLLLLPPPPHHQQRRRRIIIMTTTTNNKKSS?KVVVVAAAADDEEGGGG	1	AGG	R	K	638	400442	No	tRNA(CCU) appears to be arginine-type due to A20				0.69
GCA_001428465.1-AGG	1736482	B	GCA_001428465.1	Rhodanobacter sp. Root179	TRUE	FFLLSSSSYY**CC*WLLLLPPPPHHQQRRRRIIIMTTTTNNKKSSRRVVVVAAAADDEEGGGG	FFLLSSSSYY??CC?WLLLLPPPPHHQQRRRRIIIMTTTTNNKKSS?KVVVVAAAADDEEGGGG	1	AGG	R	K	506	396342	No	tRNA(CCU) appears to be arginine-type due to A20				0.67
GCA_001426505.1-AGG	1736541	B	GCA_001426505.1	Variovorax sp. Root473	TRUE	FFLLSSSSYY**CC*WLLLLPPPPHHQQRRRRIIIMTTTTNNKKSSRRVVVVAAAADDEEGGGG	FFLLSSSSYY??CC?WLLLLPPPPHHQQRRRRIIIMTTTTNNKKSSRKVVVVAAAADDEEGGGG	1	AGG	R	K	425	593214	No	tRNA(CCU) appears to be arginine-type due to A20				0.68
GCA_001427225.1-AGG	1736549	B	GCA_001427225.1	Lysobacter sp. Root494	TRUE	FFLLSSSSYY**CC*WLLLLPPPPHHQQRRRRIIIMTTTTNNKKSSRRVVVVAAAADDEEGGGG	FFLLSSSSYY??CC?WLLLLPPPPHHQQRRRRIIIMTTTTNNKKSSRKVVVVAAAADDEEGGGG	1	AGG	R	K	558	358257	No	tRNA(CCU) appears to be arginine-type due to A20				0.65
GCA_001427365.1-AGG	1736560	B	GCA_001427365.1	Rhodanobacter sp. Root561	TRUE	FFLLSSSSYY**CC*WLLLLPPPPHHQQRRRRIIIMTTTTNNKKSSRRVVVVAAAADDEEGGGG	FFLLSSSSYY??CC?WLLLLPPPPHHQQRRRRIIIMTTTTNNKKSSRKVVVVAAAADDEEGGGG	1	AGG	R	K	524	396693	No	tRNA(CCU) appears to be arginine-type due to A20				0.66
GCA_001464505.1-AGG	1752234	B	GCA_001464505.1	Verrucomicrobia bacterium Ga0077533	TRUE	FFLLSSSSYY**CC*WLLLLPPPPHHQQRRRRIIIMTTTTNNKKSSRRVVVVAAAADDEEGGGG	FFLLSSSSYY??CC?WLLLLPPPPHHQQRRRRIIIMTTTTNNKKSSRKVVVVAAAADDEEGGGG	1	AGG	R	K	312	265368	No	tRNA(CCU) appears to be arginine-type due to A20				0.64
GCA_900116025.1-AGG	1761901	B	GCA_900116025.1	Stenotrophomonas sp. 92mfcol6.1	TRUE	FFLLSSSSYY**CC*WLLLLPPPPHHQQRRRRIIIMTTTTNNKKSSRRVVVVAAAADDEEGGGG	FF?LSSSSYY??CC?WLLLLPPPPHHQQRRRRIIIMTTTTNNKKSSRKVVVVAAAADDEEGGGG	1	AGG	R	K	361	461586	No	tRNA(CCU) appears to be arginine-type due to A20				0.66
GCA_001507665.1-AGG	1768108	B	GCA_001507665.1	Deinococcus actinosclerus	TRUE	FFLLSSSSYY**CC*WLLLLPPPPHHQQRRRRIIIMTTTTNNKKSSRRVVVVAAAADDEEGGGG	FF?LSSSSYY??CC?WLLLLPPPPHHQQRRRRIIIMTTTTNNKKSSRKVVVVAAAADDEEGGGG	1	AGG	R	K	264	285481	No	tRNA(CCU) appears to be arginine-type due to A20				0.71
GCA_004016205.1-AGG	1774746	B	GCA_004016205.1	Cupriavidus sp. UYMSc13B	TRUE	FFLLSSSSYY**CC*WLLLLPPPPHHQQRRRRIIIMTTTTNNKKSSRRVVVVAAAADDEEGGGG	FFLLSSSSYY??CC?WLLLLPPPPHHQQRRRRIIIMTTTTNNKKSSRKVVVVAAAADDEEGGGG	1	AGG	R	K	1684	800322	No	tRNA(CCU) appears to be arginine-type due to A20				0.65
GCA_001518995.2-AGG	1779382	B	GCA_001518995.2	Rhodothermaceae bacterium RA	TRUE	FFLLSSSSYY**CC*WLLLLPPPPHHQQRRRRIIIMTTTTNNKKSSRRVVVVAAAADDEEGGGG	FFLLSSSSYY??CC?WLLLLPPPPHHQQRRRRIIIMTTTTNNKKSSKKVVVVAAAADDEEGGGG	2	AGG	R	K	267	368667	No	tRNA(CCU) appears to be arginine-type due to A20				0.68
GCA_001577635.1-AGG	1783518	B	GCA_001577635.1	Halomonadaceae bacterium T82-2	TRUE	FFLLSSSSYY**CC*WLLLLPPPPHHQQRRRRIIIMTTTTNNKKSSRRVVVVAAAADDEEGGGG	FFLLSSSSYY??CC?WLLLLPPPPHHQQRRRRIIIMTTTTNNKKSSRKVVVVAAAADDEEGGGG	1	AGG	R	K	400	424012	No	tRNA(CCU) appears to be arginine-type due to A20				0.67
GCA_001696715.1-AGG	1792543	B	GCA_001696715.1	Thauera phenolivorans	TRUE	FFLLSSSSYY**CC*WLLLLPPPPHHQQRRRRIIIMTTTTNNKKSSRRVVVVAAAADDEEGGGG	FFLLSSSSYY??CC?WLLLLPPPPHHQQRRRRIIIMTTTTNNKKSSRKVVVVAAAADDEEGGGG	1	AGG	R	K	670	397068	No	tRNA(CCU) appears to be arginine-type due to A20				0.68
GCA_012515175.1-AGG	1792543	B	GCA_012515175.1	Thauera phenolivorans	FALSE	FFLLSSSSYY**CC*WLLLLPPPPHHQQRRRRIIIMTTTTNNKKSSRRVVVVAAAADDEEGGGG	FFLLSSSSYY??CC?WLLLLPPPPHHQQRRRRIIIMTTTTNNKKSS?KVVVVAAAADDEEGGGG	1	AGG	R	K	712	406813	No	tRNA(CCU) appears to be arginine-type due to A20				0.69
GCA_001766965.1-AGG	1797175	B	GCA_001766965.1	Acidobacteria bacterium RIFCSPHIGHO2_01_FULL_67_28	TRUE	FFLLSSSSYY**CC*WLLLLPPPPHHQQRRRRIIIMTTTTNNKKSSRRVVVVAAAADDEEGGGG	FFLLSSSSYY??CC?WLLLLPPPPHHQQRRRRIIIMTTTTNNKKSSRKVVVVAAAADDEEGGGG	1	AGG	R	K	129	169019	No	tRNA(CCU) appears to be arginine-type due to A20				0.67
GCA_001766975.1-AGG	1797176	B	GCA_001766975.1	Acidobacteria bacterium RIFCSPHIGHO2_02_FULL_67_57	TRUE	FFLLSSSSYY**CC*WLLLLPPPPHHQQRRRRIIIMTTTTNNKKSSRRVVVVAAAADDEEGGGG	FFLLSSSSYY??CC?WLLLLPPPPHHQQRRRRIIIMTTTTNNKKSSRKVVVVAAAADDEEGGGG	1	AGG	R	K	118	164737	Missing	No tRNA(CCU) or tRNA(UCU)				0.67
GCA_001770325.1-AGG	1797482	B	GCA_001770325.1	Betaproteobacteria bacterium RIFCSPLOWO2_02_64_14	TRUE	FFLLSSSSYY**CC*WLLLLPPPPHHQQRRRRIIIMTTTTNNKKSSRRVVVVAAAADDEEGGGG	FFLLSSSSYY??CC?WLLLLPPPPHHQQRRRRIIIMTTTTNNKKSSRKVVVVAAAADDEEGGGG	1	AGG	R	K	1948	481291	No	tRNA(CCU) appears to be arginine-type due to A20				0.64
GCA_001771935.1-AGG	1797492	B	GCA_001771935.1	Betaproteobacteria bacterium RIFCSPLOWO2_02_FULL_67_26	TRUE	FFLLSSSSYY**CC*WLLLLPPPPHHQQRRRRIIIMTTTTNNKKSSRRVVVVAAAADDEEGGGG	FFLLSSSSYY??CC?WLLLLPPPPHHQQRRRRIIIMTTTTNNKKSSRKVVVVAAAADDEEGGGG	1	AGG	R	K	1517	409065	No	tRNA(CCU) appears to be arginine-type due to A20				0.67
GCA_001771975.1-AGG	1797493	B	GCA_001771975.1	Betaproteobacteria bacterium RIFCSPLOWO2_02_FULL_68_150	TRUE	FFLLSSSSYY**CC*WLLLLPPPPHHQQRRRRIIIMTTTTNNKKSSRRVVVVAAAADDEEGGGG	FFLLSSSSYY??CC?WLLLLPPPPHHQQRRRRIIIMTTTTNNKKSSRKVVVVAAAADDEEGGGG	1	AGG	R	K	1041	328426	No	No tRNA(CCU), Arg-type tRNA(UCU)				0.68
GCA_001794945.1-AGG	1797616	B	GCA_001794945.1	Chloroflexi bacterium GWC2_73_18	TRUE	FFLLSSSSYY**CC*WLLLLPPPPHHQQRRRRIIIMTTTTNNKKSSRRVVVVAAAADDEEGGGG	FF?LSSSSYY??CC?WLLLLPPPPHHQQRRRRIIIMTTTTNNKKSS?KVVVVAAAADDEEGGGG	1	AGG	R	K	506	261764	No	tRNA(CCU) appears to be arginine-type due to A20				0.73
GCA_001796945.1-AGG	1797657	B	GCA_001796945.1	Chloroflexi bacterium RBG_16_63_12	TRUE	FFLLSSSSYY**CC*WLLLLPPPPHHQQRRRRIIIMTTTTNNKKSSRRVVVVAAAADDEEGGGG	FFLLSSSSYY??CC?WLLLLPPPPHHQQRRRRIIIMTTTTNNKKSSRKVVVVAAAADDEEGGGG	1	AGG	R	K	502	306046	No	No tRNA(CCU), Arg-type tRNA(UCU)				0.64
GCA_001797035.1-AGG	1797663	B	GCA_001797035.1	Chloroflexi bacterium RBG_16_72_14	TRUE	FFLLSSSSYY**CC*WLLLLPPPPHHQQRRRRIIIMTTTTNNKKSSRRVVVVAAAADDEEGGGG	FF?LSSSSYY??CC?WLLLLPPPPHHQQRRRRIIIMTTTTNNKKSSRKVVVVAAAADDEEGGGG	1	AGG	R	K	693	298473	No	tRNA(CCU) appears to be arginine-type due to A20				0.73
GCA_001802015.1-AGG	1798310	B	GCA_001802015.1	Gemmatimonadetes bacterium GWC2_71_9	TRUE	FFLLSSSSYY**CC*WLLLLPPPPHHQQRRRRIIIMTTTTNNKKSSRRVVVVAAAADDEEGGGG	FFLLSSSSYY??CC?WLLLLPPPPHHQQRRRRIIIMTTTTNNKKSS?KVVVVAAAADDEEGGGG	1	AGG	R	K	570	210867	No	tRNA(CCU) appears to be arginine-type due to A20				0.71
GCA_001830405.1-AGG	1802011	B	GCA_001830405.1	Rhodanobacter sp. RIFOXYA1_FULL_67_6	TRUE	FFLLSSSSYY**CC*WLLLLPPPPHHQQRRRRIIIMTTTTNNKKSSRRVVVVAAAADDEEGGGG	FF?LSSSSYY??CC?WLLLLPPPPHHQQRRRRIIIMTTTTNNKKSS?KVVVVAAAADDEEGGGG	1	AGG	R	K	407	335305	No	tRNA(CCU) appears to be arginine-type due to A20				0.68
GCA_001790275.1-AGG	1802102	B	GCA_001790275.1	Candidatus Rokubacteria bacterium RIFCSPHIGHO2_02_FULL_73_26	TRUE	FFLLSSSSYY**CC*WLLLLPPPPHHQQRRRRIIIMTTTTNNKKSSRRVVVVAAAADDEEGGGG	FFLLSSSSYY??CC?WLLLLPPPPHHQQRRRRIIIMTTTTNNKKSSRKVVVVAAAADDEEGGGG	1	AGG	R	K	844	467337	No	tRNA(CCU) appears to be arginine-type due to A20				0.73
GCA_001788475.1-AGG	1802103	B	GCA_001788475.1	Candidatus Rokubacteria bacterium RIFCSPHIGHO2_12_FULL_73_22	TRUE	FFLLSSSSYY**CC*WLLLLPPPPHHQQRRRRIIIMTTTTNNKKSSRRVVVVAAAADDEEGGGG	FF?L?SSSYY??CC?WLLLLPPPPHHQQRRRRII?MTTTTNNKKSSRKVVVVAAAADDEEGGGG	1	AGG	R	K	686	396122	No	tRNA(CCU) appears to be arginine-type due to A20				0.73
GCA_001788495.1-AGG	1802107	B	GCA_001788495.1	Candidatus Rokubacteria bacterium RIFCSPLOWO2_02_FULL_73_56	TRUE	FFLLSSSSYY**CC*WLLLLPPPPHHQQRRRRIIIMTTTTNNKKSSRRVVVVAAAADDEEGGGG	FF?LSSSSYY??CC?WLLLLPPPPHHQQRRRRIIIMTTTTNNKKSSRKVVVVAAAADDEEGGGG	1	AGG	R	K	715	416041	No	tRNA(CCU) appears to be arginine-type due to A20				0.73
GCA_001790345.1-AGG	1802111	B	GCA_001790345.1	Candidatus Rokubacteria bacterium RIFCSPLOWO2_12_FULL_73_47	TRUE	FFLLSSSSYY**CC*WLLLLPPPPHHQQRRRRIIIMTTTTNNKKSSRRVVVVAAAADDEEGGGG	FFLL?SSSYY??CC?WLLLLPPPPHHQQRRRRII?MTTTTNNKKSSRKVVVVAAAADDEEGGGG	1	AGG	R	K	709	411782	No	tRNA(CCU) appears to be arginine-type due to A20				0.73
GCA_001830245.1-AGG	1802656	B	GCA_001830245.1	Xanthomonadales bacterium RIFOXYA1_FULL_69_10	TRUE	FFLLSSSSYY**CC*WLLLLPPPPHHQQRRRRIIIMTTTTNNKKSSRRVVVVAAAADDEEGGGG	FFLLSSSSYY??CC?WLLLLPPPPHHQQRRRRIIIMTTTTNNKKSSRKVVVVAAAADDEEGGGG	1	AGG	R	K	306	331677	No	tRNA(CCU) appears to be arginine-type due to A20				0.69
GCA_001831175.1-AGG	1802657	B	GCA_001831175.1	Xanthomonadales bacterium RIFOXYD1_FULL_69_11	TRUE	FFLLSSSSYY**CC*WLLLLPPPPHHQQRRRRIIIMTTTTNNKKSSRRVVVVAAAADDEEGGGG	FFLLSSSSYY??CC?WLLLLPPPPHHQQRRRRIIIMTTTTNNKKSSRKVVVVAAAADDEEGGGG	1	AGG	R	K	295	326477	No	tRNA(CCU) appears to be arginine-type due to A20				0.69
GCA_002894645.1-AGG	1803181	B	GCA_002894645.1	Salinibacter altiplanensis	TRUE	FFLLSSSSYY**CC*WLLLLPPPPHHQQRRRRIIIMTTTTNNKKSSRRVVVVAAAADDEEGGGG	FFLLSSSSYY??CC?WLLLLPPPPHHQQRRRRIIIMTTTTNNKKSSRKVVVVAAAADDEEGGGG	1	AGG	R	K	293	306592	No	tRNA(CCU) appears to be arginine-type due to A20				0.64
GCA_001915145.1-AGG	1803495	B	GCA_001915145.1	Actinobacteria bacterium 13_2_20CM_2_72_6	TRUE	FFLLSSSSYY**CC*WLLLLPPPPHHQQRRRRIIIMTTTTNNKKSSRRVVVVAAAADDEEGGGG	FF?LSSSSYY??CC?WLLLLPPPPHHQQRRRRIIIMTTTTNNKKSSRKVVVVAAAADDEEGGGG	1	AGG	R	K	232	243210	No	tRNA(CCU) appears to be arginine-type due to A20				0.72
GCA_001871755.1-AGG	1805005	B	GCA_001871755.1	Anaerolineae bacterium CG2_30_64_16	TRUE	FFLLSSSSYY**CC*WLLLLPPPPHHQQRRRRIIIMTTTTNNKKSSRRVVVVAAAADDEEGGGG	FFLLSSSSYY??CC?WLLLLPPPPHHQQRRRRIIIMTTTTNNKKSS?KVVVVAAAADDEEGGGG	1	AGG	R	K	817	338627	No	No tRNA(CCU), Arg-type tRNA(UCU)				0.64
GCA_001920645.1-AGG	1805058	B	GCA_001920645.1	Chloroflexi bacterium 13_1_20CM_2_70_9	TRUE	FFLLSSSSYY**CC*WLLLLPPPPHHQQRRRRIIIMTTTTNNKKSSRRVVVVAAAADDEEGGGG	FF?LSSSSYY??CC?WLLLLPPPPHHQQRRRRIIIMTTTTNNKKSSKKVVVVAAAADDEEGGGG	2	AGG	R	K	312	163505	No	No tRNA(CCU), Arg-type tRNA(UCU)				0.7
GCA_001914695.1-AGG	1805166	B	GCA_001914695.1	Gammaproteobacteria bacterium 13_2_20CM_66_19	TRUE	FFLLSSSSYY**CC*WLLLLPPPPHHQQRRRRIIIMTTTTNNKKSSRRVVVVAAAADDEEGGGG	FFLLSSSSYY??CC?WLLLLPPPPHHQQRRRRIIIMTTTTNNKKSSRKVVVVAAAADDEEGGGG	1	AGG	R	K	966	336414	No	tRNA(CCU) appears to be arginine-type due to A20				0.68
GCA_001919545.1-AGG	1805178	B	GCA_001919545.1	Gemmatimonadetes bacterium 13_1_20CM_69_52	TRUE	FFLLSSSSYY**CC*WLLLLPPPPHHQQRRRRIIIMTTTTNNKKSSRRVVVVAAAADDEEGGGG	FFLLSSSSYY??CC?WLLLLPPPPHHQQRRRRII?MTTTTNNKKSSRKVVVVAAAADDEEGGGG	1	AGG	R	K	32	26686	Missing	No tRNA(CCU) or tRNA(UCU)				0.69
GCA_001919115.1-AGG	1805183	B	GCA_001919115.1	Gemmatimonadetes bacterium 13_1_40CM_2_70_7	TRUE	FFLLSSSSYY**CC*WLLLLPPPPHHQQRRRRIIIMTTTTNNKKSSRRVVVVAAAADDEEGGGG	FFLLSSSSYY??CC?WLLLLPPPPHHQQRRRRIIIMTTTTNNKKSSRKVVVVAAAADDEEGGGG	1	AGG	R	K	144	160980	No	tRNA(CCU) appears to be arginine-type due to A20				0.7
GCA_001918555.1-AGG	1805188	B	GCA_001918555.1	Gemmatimonadetes bacterium 13_1_40CM_3_70_6	TRUE	FFLLSSSSYY**CC*WLLLLPPPPHHQQRRRRIIIMTTTTNNKKSSRRVVVVAAAADDEEGGGG	FFLLSSSSYY??CC?WLLLLPPPPHHQQRRRRIIIMTTTTNNKKSSRKVVVVAAAADDEEGGGG	1	AGG	R	K	128	162856	No	tRNA(CCU) appears to be arginine-type due to A20				0.7
GCA_001917665.1-AGG	1805196	B	GCA_001917665.1	Gemmatimonadetes bacterium 13_1_40CM_69_22	TRUE	FFLLSSSSYY**CC*WLLLLPPPPHHQQRRRRIIIMTTTTNNKKSSRRVVVVAAAADDEEGGGG	FFLLSSSSYY??CC?WLLLLPPPPHHQQRRRRIIIMTTTTNNKKSSRKVVVVAAAADDEEGGGG	1	AGG	R	K	270	214760	No	tRNA(CCU) appears to be arginine-type due to A20				0.7
GCA_001917625.1-AGG	1805199	B	GCA_001917625.1	Gemmatimonadetes bacterium 13_1_40CM_70_15	TRUE	FFLLSSSSYY**CC*WLLLLPPPPHHQQRRRRIIIMTTTTNNKKSSRRVVVVAAAADDEEGGGG	FFLLSSSSYY??CC?WLLLLPPPPHHQQRRRRIIIMTTTTNNKKSSRKVVVVAAAADDEEGGGG	1	AGG	R	K	227	165755	No	tRNA(CCU) appears to be arginine-type due to A20				0.7
GCA_001914565.1-AGG	1805207	B	GCA_001914565.1	Gemmatimonadetes bacterium 13_2_20CM_70_9	TRUE	FFLLSSSSYY**CC*WLLLLPPPPHHQQRRRRIIIMTTTTNNKKSSRRVVVVAAAADDEEGGGG	FFLLSSSSYY??CC?WLLLLPPPPHHQQRRRRII?MTTTTNNKKSSRKVVVVAAAADDEEGGGG	1	AGG	R	K	285	217921	No	tRNA(CCU) appears to be arginine-type due to A20				0.7
GCA_001914465.1-AGG	1805374	B	GCA_001914465.1	Candidatus Rokubacteria bacterium 13_2_20CM_70_12	TRUE	FFLLSSSSYY**CC*WLLLLPPPPHHQQRRRRIIIMTTTTNNKKSSRRVVVVAAAADDEEGGGG	FFLLSSSSYY??CC?WLLLLPPPPHHQQRRRRIIIMTTTTNNKKSSRKVVVVAAAADDEEGGGG	1	AGG	R	K	599	208402	Missing	No tRNA(CCU) or tRNA(UCU)				0.7
GCA_001697225.1-AGG	1810504	B	GCA_001697225.1	Immundisolibacter cernigliae	TRUE	FFLLSSSSYY**CC*WLLLLPPPPHHQQRRRRIIIMTTTTNNKKSSRRVVVVAAAADDEEGGGG	FFLLSSSSYY??CC?WLLLLPPPPHHQQRRRRIIIMTTTTNNKKSS?KVVVVAAAADDEEGGGG	1	AGG	R	K	406	365550	No	tRNA(CCU) appears to be arginine-type due to A20				0.68
GCA_001828715.1-AGG	1817753	B	GCA_001828715.1	Pseudomonadales bacterium GWC1_66_9	TRUE	FFLLSSSSYY**CC*WLLLLPPPPHHQQRRRRIIIMTTTTNNKKSSRRVVVVAAAADDEEGGGG	FFLLSSSSYY??CC?WLLLLPPPPHHQQRRRRIIIMTTTTNNKKSS?KVVVVAAAADDEEGGGG	1	AGG	R	K	800	348301	No	tRNA(CCU) appears to be arginine-type due to A20				0.66
GCA_001785045.1-AGG	1817756	B	GCA_001785045.1	Candidatus Muproteobacteria bacterium RBG_16_62_13	TRUE	FFLLSSSSYY**CC*WLLLLPPPPHHQQRRRRIIIMTTTTNNKKSSRRVVVVAAAADDEEGGGG	FFLLSSSSYY??CC?WLLLLPPPPHHQQRRRRIIIMTTTTNNKKSSRKVVVVAAAADDEEGGGG	1	AGG	R	K	335	223919	No	No tRNA(CCU), Arg-type tRNA(UCU)				0.63
GCA_001785085.1-AGG	1817757	B	GCA_001785085.1	Candidatus Muproteobacteria bacterium RBG_16_64_10	TRUE	FFLLSSSSYY**CC*WLLLLPPPPHHQQRRRRIIIMTTTTNNKKSSRRVVVVAAAADDEEGGGG	FFLLSSSSYY??CC?WLLLLPPPPHHQQRRRRIIIMTTTTNNKKSSRKVVVVAAAADDEEGGGG	1	AGG	R	K	194	156291	No	tRNA(CCU) appears to be arginine-type due to A20				0.65
GCA_001785055.1-AGG	1817759	B	GCA_001785055.1	Candidatus Muproteobacteria bacterium RBG_16_65_31	TRUE	FFLLSSSSYY**CC*WLLLLPPPPHHQQRRRRIIIMTTTTNNKKSSRRVVVVAAAADDEEGGGG	FFLLSSSSYY??CC?WLLLLPPPPHHQQRRRRIIIMTTTTNNKKSSRKVVVVAAAADDEEGGGG	1	AGG	R	K	432	196465	Missing	No tRNA(CCU) or tRNA(UCU)				0.66
GCA_001785115.1-AGG	1817760	B	GCA_001785115.1	Candidatus Muproteobacteria bacterium RBG_16_65_34	TRUE	FFLLSSSSYY**CC*WLLLLPPPPHHQQRRRRIIIMTTTTNNKKSSRRVVVVAAAADDEEGGGG	FFLLSSSSYY??CC?WLLLLPPPPHHQQRRRRIIIMTTTTNNKKSSRKVVVVAAAADDEEGGGG	1	AGG	R	K	480	240375	No	tRNA(CCU) appears to be arginine-type due to A20				0.65
GCA_001786695.1-AGG	1817762	B	GCA_001786695.1	Candidatus Muproteobacteria bacterium RIFCSPHIGHO2_01_60_12	TRUE	FFLLSSSSYY**CC*WLLLLPPPPHHQQRRRRIIIMTTTTNNKKSSRRVVVVAAAADDEEGGGG	FFLLSSSSYY??CC?WLLLLPPPPHHQQRRRRIIIMTTTTNNKKSSRKVVVVAAAADDEEGGGG	1	AGG	R	K	456	226015	No	tRNA(CCU) appears to be arginine-type due to A20				0.6
GCA_001785125.1-AGG	1817763	B	GCA_001785125.1	Candidatus Muproteobacteria bacterium RIFCSPHIGHO2_01_FULL_61_200	TRUE	FFLLSSSSYY**CC*WLLLLPPPPHHQQRRRRIIIMTTTTNNKKSSRRVVVVAAAADDEEGGGG	FFLLSSSSYY??CC?WLLLLPPPPHHQQRRRRIIIMTTTTNNKKSSRKVVVVAAAADDEEGGGG	1	AGG	R	K	326	175713	Missing	No tRNA(CCU) or tRNA(UCU)				0.61
GCA_001785175.1-AGG	1817764	B	GCA_001785175.1	Candidatus Muproteobacteria bacterium RIFCSPHIGHO2_01_FULL_65_16	TRUE	FFLLSSSSYY**CC*WLLLLPPPPHHQQRRRRIIIMTTTTNNKKSSRRVVVVAAAADDEEGGGG	FFLLSSSSYY??CC?WLLLLPPPPHHQQRRRRIIIMTTTTNNKKSSRKVVVVAAAADDEEGGGG	1	AGG	R	K	461	211258	Missing	No tRNA(CCU) or tRNA(UCU)				0.65
GCA_001785155.1-AGG	1817765	B	GCA_001785155.1	Candidatus Muproteobacteria bacterium RIFCSPHIGHO2_02_FULL_60_13	TRUE	FFLLSSSSYY**CC*WLLLLPPPPHHQQRRRRIIIMTTTTNNKKSSRRVVVVAAAADDEEGGGG	FFLLSSSSYY??CC?WLLLLPPPPHHQQRRRRIIIMTTTTNNKKSSRKVVVVAAAADDEEGGGG	1	AGG	R	K	416	211323	No	tRNA(CCU) appears to be arginine-type due to A20				0.6
GCA_001786715.1-AGG	1817766	B	GCA_001786715.1	Candidatus Muproteobacteria bacterium RIFCSPHIGHO2_02_FULL_65_16	TRUE	FFLLSSSSYY**CC*WLLLLPPPPHHQQRRRRIIIMTTTTNNKKSSRRVVVVAAAADDEEGGGG	FFLLSSSSYY??CC?WLLLLPPPPHHQQRRRRIIIMTTTTNNKKSSRKVVVVAAAADDEEGGGG	1	AGG	R	K	442	198494	Missing	No tRNA(CCU) or tRNA(UCU)				0.65
GCA_001785195.1-AGG	1817767	B	GCA_001785195.1	Candidatus Muproteobacteria bacterium RIFCSPHIGHO2_12_FULL_60_33	TRUE	FFLLSSSSYY**CC*WLLLLPPPPHHQQRRRRIIIMTTTTNNKKSSRRVVVVAAAADDEEGGGG	FFLLSSSSYY??CC?WLLLLPPPPHHQQRRRRIIIMTTTTNNKKSSRKVVVVAAAADDEEGGGG	1	AGG	R	K	428	229605	No	tRNA(CCU) appears to be arginine-type due to A20				0.6
GCA_001785205.1-AGG	1817768	B	GCA_001785205.1	Candidatus Muproteobacteria bacterium RIFCSPLOWO2_01_FULL_60_18	TRUE	FFLLSSSSYY**CC*WLLLLPPPPHHQQRRRRIIIMTTTTNNKKSSRRVVVVAAAADDEEGGGG	FFLLSSSSYY??CC?WLLLLPPPPHHQQRRRRIIIMTTTTNNKKSSRKVVVVAAAADDEEGGGG	1	AGG	R	K	462	257789	No	tRNA(CCU) appears to be arginine-type due to A20				0.6
GCA_004801855.1-AGG	1821274	B	GCA_004801855.1	Pseudomonas sp. A-1	TRUE	FFLLSSSSYY**CC*WLLLLPPPPHHQQRRRRIIIMTTTTNNKKSSRRVVVVAAAADDEEGGGG	FFLLSSSSYY??CC?WLLLLPPPPHHQQRRRRIIIMTTTTNNKKSSRKVVVVAAAADDEEGGGG	1	AGG	R	K	827	525910	No	tRNA(CCU) appears to be arginine-type due to A20				0.68
GCA_001748265.1-AGG	1826671	B	GCA_001748265.1	Pseudomonas humi	TRUE	FFLLSSSSYY**CC*WLLLLPPPPHHQQRRRRIIIMTTTTNNKKSSRRVVVVAAAADDEEGGGG	FFLLSSSSYY??CC?WLLLLPPPPHHQQRRRRIIIMTTTTNNKKSSRKVVVVAAAADDEEGGGG	1	AGG	R	K	810	753989	No	tRNA(CCU) appears to be arginine-type due to A20				0.67
GCA_001683835.1-AGG	1839756	B	GCA_001683835.1	Ralstonia sp. RL	TRUE	FFLLSSSSYY**CC*WLLLLPPPPHHQQRRRRIIIMTTTTNNKKSSRRVVVVAAAADDEEGGGG	FFLLSSSSYY??CC?WLLLLPPPPHHQQRRRRIIIMTTTTNNKKSSRKVVVVAAAADDEEGGGG	1	AGG	R	K	544	577086	No	tRNA(CCU) appears to be arginine-type due to A20				0.66
GCA_001653115.1-AGG	1840095	B	GCA_001653115.1	Streptomyces sp. F-3	TRUE	FFLLSSSSYY**CC*WLLLLPPPPHHQQRRRRIIIMTTTTNNKKSSRRVVVVAAAADDEEGGGG	FFLLSSSSYY??CC?WLLLLPPPPHHQQRRRRIIIMTTTTNNKKSSRKVVVVAAAADDEEGGGG	1	AGG	R	K	1613	458305	No	tRNA(CCU) appears to be arginine-type due to A20				0.72
GCA_001683895.1-AGG	1844759	B	GCA_001683895.1	Luteimonas sp. ANT-B3E	TRUE	FFLLSSSSYY**CC*WLLLLPPPPHHQQRRRRIIIMTTTTNNKKSSRRVVVVAAAADDEEGGGG	FFLLSSSSYY??CC?WLLLLPPPPHHQQRRRRIIIMTTTTNNKKSS?KVVVVAAAADDEEGGGG	1	AGG	R	K	467	275622	No	tRNA(CCU) appears to be arginine-type due to A20				0.7
GCA_002068225.1-AGG	1852794	B	GCA_002068225.1	Alphaproteobacteria bacterium ADurb.BinA305	TRUE	FFLLSSSSYY**CC*WLLLLPPPPHHQQRRRRIIIMTTTTNNKKSSRRVVVVAAAADDEEGGGG	FF?LSSSSYY??CC?WLLLLPPPPHHQQRRRRIIIMTTTTNNKKSSRKVVVVAAAADDEEGGGG	1	AGG	R	K	505	380122	No	tRNA(CCU) appears to be arginine-type due to A20				0.7
GCA_002068205.1-AGG	1852824	B	GCA_002068205.1	candidate division BRC1 bacterium ADurb.BinA292	TRUE	FFLLSSSSYY**CC*WLLLLPPPPHHQQRRRRIIIMTTTTNNKKSSRRVVVVAAAADDEEGGGG	FFLLSSSSYY??CC?WLLLLPPPPHHQQRRRRIIIMTTTTNNKKSSRKVVVVAAAADDEEGGGG	1	AGG	R	K	205	282019	No	tRNA(CCU) appears to be arginine-type due to A20				0.67
GCA_002068935.1-AGG	1852859	B	GCA_002068935.1	Chloroflexi bacterium ADurb.Bin325	TRUE	FFLLSSSSYY**CC*WLLLLPPPPHHQQRRRRIIIMTTTTNNKKSSRRVVVVAAAADDEEGGGG	FFLLSSSSYY??CC?WLLLLPPPPHHQQRRRRIIIMTTTTNNKKSSRKVVVVAAAADDEEGGGG	1	AGG	R	K	549	378314	No	tRNA(CCU) appears to be arginine-type due to A20				0.68
GCA_002068325.1-AGG	1852901	B	GCA_002068325.1	Lentisphaerae bacterium ADurb.BinA184	TRUE	FFLLSSSSYY**CC*WLLLLPPPPHHQQRRRRIIIMTTTTNNKKSSRRVVVVAAAADDEEGGGG	FF?LSSSSYY??CC?WLLLLPPPPHHQQRRRRIIIMTTTTNNKKSSRKVVVVAAAADDEEGGGG	1	AGG	R	K	460	256462	No	tRNA(CCU) appears to be arginine-type due to A20				0.69
GCA_900115445.1-AGG	1855317	B	GCA_900115445.1	Variovorax sp. OK605	TRUE	FFLLSSSSYY**CC*WLLLLPPPPHHQQRRRRIIIMTTTTNNKKSSRRVVVVAAAADDEEGGGG	FFLLSSSSYY??CC?WLLLLPPPPHHQQRRRRIIIMTTTTNNKKSSRKVVVVAAAADDEEGGGG	1	AGG	R	K	973	787983	No	tRNA(CCU) appears to be arginine-type due to A20				0.68
GCA_001984095.1-AGG	1855730	B	GCA_001984095.1	Pelomonas sp. KK5	TRUE	FFLLSSSSYY**CC*WLLLLPPPPHHQQRRRRIIIMTTTTNNKKSSRRVVVVAAAADDEEGGGG	FFLLSSSSYY??CC?WLLLLPPPPHHQQRRRRIIIMTTTTNNKKSSRKVVVVAAAADDEEGGGG	1	AGG	R	K	862	720398	No	tRNA(CCU) appears to be arginine-type due to A20				0.69
GCA_900089955.1-AGG	1860102	B	GCA_900089955.1	Candidatus Accumulibacter aalborgensis	TRUE	FFLLSSSSYY**CC*WLLLLPPPPHHQQRRRRIIIMTTTTNNKKSSRRVVVVAAAADDEEGGGG	FFLLSSSSYY??CC?WLLLLPPPPHHQQRRRRIIIMTTTTNNKKSSRKVVVVAAAADDEEGGGG	1	AGG	R	K	1619	478550	No	tRNA(CCU) appears to be arginine-type due to A20				0.62
GCA_003265685.1-AGG	1861917	B	GCA_003265685.1	Piscinibacter caeni	TRUE	FFLLSSSSYY**CC*WLLLLPPPPHHQQRRRRIIIMTTTTNNKKSSRRVVVVAAAADDEEGGGG	FF?LSSSSYY??CC?WLLLLPPPPHHQQRRRRIIIMTTTTNNKKSSRKVVVVAAAADDEEGGGG	1	AGG	R	K	537	619963	No	tRNA(CCU) appears to be arginine-type due to A20				0.71
GCA_004193255.1-AGG	1869212	B	GCA_004193255.1	Chitinophagaceae bacterium	FALSE	FFLLSSSSYY**CC*WLLLLPPPPHHQQRRRRIIIMTTTTNNKKSSRRVVVVAAAADDEEGGGG	FFLLSSSSYY??CC?WLLLLPPPPHHQQRRRRIIIMTTTTNNKKSSRKVVVVAAAADDEEGGGG	1	AGG	R	K	499	400974	No	tRNA(CCU) appears to be arginine-type due to A20				0.62
GCA_004559175.1-AGG	1869227	B	GCA_004559175.1	bacterium	FALSE	FFLLSSSSYY**CC*WLLLLPPPPHHQQRRRRIIIMTTTTNNKKSSRRVVVVAAAADDEEGGGG	FFLLSSSSYY??CC?WLLLLPPPPHHQQRRRRIIIMTTTTNNKKSS?KVVVVAAAADDEEGGGG	1	AGG	R	K	205	207422	No	No tRNA(CCU), Arg-type tRNA(UCU)				0.63
GCA_004559335.1-AGG	1869227	B	GCA_004559335.1	bacterium	FALSE	FFLLSSSSYY**CC*WLLLLPPPPHHQQRRRRIIIMTTTTNNKKSSRRVVVVAAAADDEEGGGG	FFLLSSSSYY??CC?WLLLLPPPPHHQQRRRRIIIMTTTTNNKKSSRKVVVVAAAADDEEGGGG	1	AGG	R	K	73	148659	Missing	No tRNA(CCU) or tRNA(UCU)				0.63
GCA_004559365.1-AGG	1869227	B	GCA_004559365.1	bacterium	FALSE	FFLLSSSSYY**CC*WLLLLPPPPHHQQRRRRIIIMTTTTNNKKSSRRVVVVAAAADDEEGGGG	FFLLSSSSYY??CC?WLLLLPPPPHHQQRRRRIIIMTTTTNNKKSSRKVVVVAAAADDEEGGGG	1	AGG	R	K	345	120853	Missing	No tRNA(CCU) or tRNA(UCU)				0.59
GCA_004559505.1-AGG	1869227	B	GCA_004559505.1	bacterium	FALSE	FFLLSSSSYY**CC*WLLLLPPPPHHQQRRRRIIIMTTTTNNKKSSRRVVVVAAAADDEEGGGG	FFLLSSSSYY??CC?WLLLLPPPPHHQQRRRRIIIMTTTTNNKKSSRKVVVVAAAADDEEGGGG	1	AGG	R	K	206	245897	No	tRNA(CCU) appears to be arginine-type due to A20				0.61
GCA_004559735.1-AGG	1869227	B	GCA_004559735.1	bacterium	FALSE	FFLLSSSSYY**CC*WLLLLPPPPHHQQRRRRIIIMTTTTNNKKSSRRVVVVAAAADDEEGGGG	FFLLSSSSYY??CC?WLLLLPPPPHHQQRRRRIIIMTTTTNNKKSSRKVVVVAAAADDEEGGGG	1	AGG	R	K	281	161726	No	tRNA(CCU) appears to be arginine-type due to A20				0.63
GCA_004561025.1-AGG	1869227	B	GCA_004561025.1	bacterium	FALSE	FFLLSSSSYY**CC*WLLLLPPPPHHQQRRRRIIIMTTTTNNKKSSRRVVVVAAAADDEEGGGG	FFLLSSSSYY??CC?WLL?LPPPPHHQQRRRRIIIMTTTTNNKKSSRKVVVVAAAADDEEGGGG	1	AGG	R	K	194	112481	No	tRNA(CCU) appears to be arginine-type due to A20				0.62
GCA_004561485.1-AGG	1869227	B	GCA_004561485.1	bacterium	FALSE	FFLLSSSSYY**CC*WLLLLPPPPHHQQRRRRIIIMTTTTNNKKSSRRVVVVAAAADDEEGGGG	FFLLSSSSYY??CC?WLLLLPPPPHHQQRRRRIIIMTTTTNNKKSSRKVVVVAAAADDEEGGGG	1	AGG	R	K	298	195370	No	tRNA(CCU) appears to be arginine-type due to A20				0.61
GCA_004561545.1-AGG	1869227	B	GCA_004561545.1	bacterium	FALSE	FFLLSSSSYY**CC*WLLLLPPPPHHQQRRRRIIIMTTTTNNKKSSRRVVVVAAAADDEEGGGG	FFLLSSSSYY??CC?WLLLLPPPPHHQQRRRRIIIMTTTTNNKKSSRKVVVVAAAADDEEGGGG	1	AGG	R	K	241	169959	No	No tRNA(CCU), Arg-type tRNA(UCU)				0.61
GCA_004562755.1-AGG	1869227	B	GCA_004562755.1	bacterium	FALSE	FFLLSSSSYY**CC*WLLLLPPPPHHQQRRRRIIIMTTTTNNKKSSRRVVVVAAAADDEEGGGG	FFLLSSSSYY??CC?WLLLLPPPPHHQQRRRRIIIMTTTTNNKKSSRKVVVVAAAADDEEGGGG	1	AGG	R	K	219	150728	No	No tRNA(CCU), Arg-type tRNA(UCU)				0.61
GCA_004562925.1-AGG	1869227	B	GCA_004562925.1	bacterium	FALSE	FFLLSSSSYY**CC*WLLLLPPPPHHQQRRRRIIIMTTTTNNKKSSRRVVVVAAAADDEEGGGG	FFLLSSSSYY??CC?WLLLLPPPPHHQQRRRRIIIMTTTTNNKKSSRKVVVVAAAADDEEGGGG	1	AGG	R	K	238	159227	No	No tRNA(CCU), Arg-type tRNA(UCU)				0.62
GCA_004563565.1-AGG	1869227	B	GCA_004563565.1	bacterium	FALSE	FFLLSSSSYY**CC*WLLLLPPPPHHQQRRRRIIIMTTTTNNKKSSRRVVVVAAAADDEEGGGG	FFLLSSSSYY??CC?WLLLLPPPPHHQQRRRRIIIMTTTTNNKKSSRKVVVVAAAADDEEGGGG	1	AGG	R	K	233	172611	Missing	No tRNA(CCU) or tRNA(UCU)				0.61
GCA_011620125.1-AGG	1869338	B	GCA_011620125.1	Dyella sp.	TRUE	FFLLSSSSYY**CC*WLLLLPPPPHHQQRRRRIIIMTTTTNNKKSSRRVVVVAAAADDEEGGGG	FFLLSSSSYY??CC?WLLLLPPPPHHQQRRRRIIIMTTTTNNKKSSRKVVVVAAAADDEEGGGG	1	AGG	R	K	733	408461	No	No tRNA(CCU), Arg-type tRNA(UCU)				0.67
GCA_009911995.1-AGG	1871043	B	GCA_009911995.1	Variovorax sp.	TRUE	FFLLSSSSYY**CC*WLLLLPPPPHHQQRRRRIIIMTTTTNNKKSSRRVVVVAAAADDEEGGGG	FF?LSSSSYY??CC?WLLLLPPPPHHQQRRRRIIIMTTTTNNKKSSRKVVVVAAAADDEEGGGG	1	AGG	R	K	537	729191	No	tRNA(CCU) appears to be arginine-type due to A20				0.7
GCA_004210995.1-AGG	1871043	B	GCA_004210995.1	Variovorax sp.	FALSE	FFLLSSSSYY**CC*WLLLLPPPPHHQQRRRRIIIMTTTTNNKKSSRRVVVVAAAADDEEGGGG	FFLLSSSSYY??CC?WLLLLPPPPHHQQRRRRIIIMTTTTNNKKSSRKVVVVAAAADDEEGGGG	1	AGG	R	K	1040	490138	No	tRNA(CCU) appears to be arginine-type due to A20				0.68
GCA_004211295.1-AGG	1871043	B	GCA_004211295.1	Variovorax sp.	FALSE	FFLLSSSSYY**CC*WLLLLPPPPHHQQRRRRIIIMTTTTNNKKSSRRVVVVAAAADDEEGGGG	FF?LSSSSYY??CC?WLLLLPPPPHHQQRRRRII?MTTTTNNKKSS?KVVVVAAAADDEEGGGG	1	AGG	R	K	373	234546	No	tRNA(CCU) appears to be arginine-type due to A20				0.69
GCA_004211305.1-AGG	1871043	B	GCA_004211305.1	Variovorax sp.	FALSE	FFLLSSSSYY**CC*WLLLLPPPPHHQQRRRRIIIMTTTTNNKKSSRRVVVVAAAADDEEGGGG	FF?LSSSSYY??CC?WLLLLPPPPHHQQRRRRIIIMTTTTNNKKSSRKVVVVAAAADDEEGGGG	1	AGG	R	K	257	202789	No	tRNA(CCU) appears to be arginine-type due to A20				0.67
GCA_004296235.1-AGG	1871043	B	GCA_004296235.1	Variovorax sp.	FALSE	FFLLSSSSYY**CC*WLLLLPPPPHHQQRRRRIIIMTTTTNNKKSSRRVVVVAAAADDEEGGGG	FF?LSSSSYY??CC?WLLLLPPPPHHQQRRRRIIIMTTTTNNKKSS?KVVVVAAAADDEEGGGG	1	AGG	R	K	1005	752483	Missing	No tRNA(CCU) or tRNA(UCU)				0.72
GCA_004296945.1-AGG	1871043	B	GCA_004296945.1	Variovorax sp.	FALSE	FFLLSSSSYY**CC*WLLLLPPPPHHQQRRRRIIIMTTTTNNKKSSRRVVVVAAAADDEEGGGG	FFLLSSSSYY??CC?WLLLLPPPPHHQQRRRRIIIMTTTTNNKKSSRKVVVVAAAADDEEGGGG	1	AGG	R	K	708	812726	No	tRNA(CCU) appears to be arginine-type due to A20				0.7
GCA_003449975.1-AGG	1871071	B	GCA_003449975.1	Comamonadaceae bacterium	FALSE	FFLLSSSSYY**CC*WLLLLPPPPHHQQRRRRIIIMTTTTNNKKSSRRVVVVAAAADDEEGGGG	FFLLSSSSYY??CC?WLLLLPPPPHHQQRRRRIIIMTTTTNNKKSSRKVVVVAAAADDEEGGGG	1	AGG	R	K	582	398789	No	tRNA(CCU) appears to be arginine-type due to A20				0.68
GCA_012800935.1-AGG	1871071	B	GCA_012800935.1	Comamonadaceae bacterium	FALSE	FFLLSSSSYY**CC*WLLLLPPPPHHQQRRRRIIIMTTTTNNKKSSRRVVVVAAAADDEEGGGG	FF?LSSSSYY??CC?WLLLLPPPPHHQQRRRRIIIMTTTTNNKKSSRKVVVVAAAADDEEGGGG	1	AGG	R	K	638	369318	No	No tRNA(CCU), Arg-type tRNA(UCU)				0.72
GCA_009774845.1-AGG	1872444	B	GCA_009774845.1	Alistipes sp.	TRUE	FFLLSSSSYY**CC*WLLLLPPPPHHQQRRRRIIIMTTTTNNKKSSRRVVVVAAAADDEEGGGG	FFLLSSSSYY??CC?WLLLLPPPPHHQQRRRRIIIMTTTTNNKKSSRKVVVVAAAADDEEGGGG	1	AGG	R	K	244	197397	No	tRNA(CCU) appears to be arginine-type due to A20				0.6
GCA_003489785.1-AGG	1872444	B	GCA_003489785.1	Alistipes sp.	FALSE	FFLLSSSSYY**CC*WLLLLPPPPHHQQRRRRIIIMTTTTNNKKSSRRVVVVAAAADDEEGGGG	FFLLSSSSYY??CC?WLLLLPPPPHHQQRRRRIIIMTTTTNNKKSSRKVVVVAAAADDEEGGGG	1	AGG	R	K	312	200029	No	tRNA(CCU) appears to be arginine-type due to A20				0.61
GCA_004297605.1-AGG	1872578	B	GCA_004297605.1	Aquabacterium sp.	FALSE	FFLLSSSSYY**CC*WLLLLPPPPHHQQRRRRIIIMTTTTNNKKSSRRVVVVAAAADDEEGGGG	FFLLSSSSYY??CC?WLLLLPPPPHHQQRRRRIIIMTTTTNNKKSSRKVVVVAAAADDEEGGGG	1	AGG	R	K	626	474927	No	tRNA(CCU) appears to be arginine-type due to A20				0.7
GCA_003242505.1-AGG	1879010	B	GCA_003242505.1	Firmicutes bacterium	FALSE	FFLLSSSSYY**CC*WLLLLPPPPHHQQRRRRIIIMTTTTNNKKSSRRVVVVAAAADDEEGGGG	FFLLSSSSYY??CC?WLLLLPPPPHHQQRRRRIIIMTTTTNNKKSS?KVVVVAAAADDEEGGGG	1	AGG	R	K	584	338147	No	tRNA(CCU) appears to be arginine-type due to A20				0.71
GCA_011055905.1-AGG	1879010	B	GCA_011055905.1	Firmicutes bacterium	FALSE	FFLLSSSSYY**CC*WLLLLPPPPHHQQRRRRIIIMTTTTNNKKSSRRVVVVAAAADDEEGGGG	FFLLSSSSYY??CC?WLLLLPPPPHHQQRRRRIIIMTTTTNNKKSS?KVVVVAAAADDEEGGGG	1	AGG	R	K	336	202838	No	tRNA(CCU) appears to be arginine-type due to A20				0.73
GCA_900101335.1-AGG	1881057	B	GCA_900101335.1	Quadrisphaera sp. DSM 44207	TRUE	FFLLSSSSYY**CC*WLLLLPPPPHHQQRRRRIIIMTTTTNNKKSSRRVVVVAAAADDEEGGGG	FF?LSSSSYY??CC?WLL?LPPPPHHQQRRRR?I?MTT?T?NKK?S?KVV?VAAAADDEEGGGG	1	AGG	R	K	340	257767	No	tRNA(CCU) appears to be arginine-type due to A20				0.77
GCA_900104925.1-AGG	1882749	B	GCA_900104925.1	Opitutus sp. GAS368	TRUE	FFLLSSSSYY**CC*WLLLLPPPPHHQQRRRRIIIMTTTTNNKKSSRRVVVVAAAADDEEGGGG	FFLLSSSSYY??CC?WLLLLPPPPHHQQRRRRIIIMTTTTNNKKSSRKVVVVAAAADDEEGGGG	1	AGG	R	K	423	346383	No	tRNA(CCU) appears to be arginine-type due to A20				0.66
GCA_900115375.1-AGG	1882827	B	GCA_900115375.1	Variovorax sp. PDC80	TRUE	FFLLSSSSYY**CC*WLLLLPPPPHHQQRRRRIIIMTTTTNNKKSSRRVVVVAAAADDEEGGGG	FFLLSSSSYY??CC?WLLLLPPPPHHQQRRRRIIIMTTTTNNKKSSRKVVVVAAAADDEEGGGG	1	AGG	R	K	751	819863	No	tRNA(CCU) appears to be arginine-type due to A20				0.7
GCA_005883255.1-AGG	1883427	B	GCA_005883255.1	Actinobacteria bacterium	FALSE	FFLLSSSSYY**CC*WLLLLPPPPHHQQRRRRIIIMTTTTNNKKSSRRVVVVAAAADDEEGGGG	FF?LSSSSYY??CC?WLLLLPPPPHHQQRRRRIIIMTTTTNNKKSS?KVVVVAAAADDEEGGGG	1	AGG	R	K	170	208518	Missing	No tRNA(CCU) or tRNA(UCU)				0.74
GCA_004298975.1-AGG	1883446	B	GCA_004298975.1	Rhodanobacter sp.	TRUE	FFLLSSSSYY**CC*WLLLLPPPPHHQQRRRRIIIMTTTTNNKKSSRRVVVVAAAADDEEGGGG	FFLLSSSSYY??CC?WLLLLPPPPHHQQRRRRIIIMTTTTNNKKSSRKVVVVAAAADDEEGGGG	1	AGG	R	K	317	455470	No	tRNA(CCU) appears to be arginine-type due to A20				0.65
GCA_004297905.1-AGG	1883446	B	GCA_004297905.1	Rhodanobacter sp.	FALSE	FFLLSSSSYY**CC*WLLLLPPPPHHQQRRRRIIIMTTTTNNKKSSRRVVVVAAAADDEEGGGG	FFLLSSSSYY??CC?WLLLLPPPPHHQQRRRRIIIMTTTTNNKKSS?KVVVVAAAADDEEGGGG	1	AGG	R	K	230	355943	No	tRNA(CCU) appears to be arginine-type due to A20				0.67
GCA_004298045.1-AGG	1883446	B	GCA_004298045.1	Rhodanobacter sp.	FALSE	FFLLSSSSYY**CC*WLLLLPPPPHHQQRRRRIIIMTTTTNNKKSSRRVVVVAAAADDEEGGGG	FFLLSSSSYY??CC?WLLLLPPPPHHQQRRRRIIIMTTTTNNKKSS?KVVVVAAAADDEEGGGG	1	AGG	R	K	232	346759	No	tRNA(CCU) appears to be arginine-type due to A20				0.67
GCA_004298935.1-AGG	1883446	B	GCA_004298935.1	Rhodanobacter sp.	FALSE	FFLLSSSSYY**CC*WLLLLPPPPHHQQRRRRIIIMTTTTNNKKSSRRVVVVAAAADDEEGGGG	FFLLSSSSYY??CC?WLLLLPPPPHHQQRRRRIIIMTTTTNNKKSS?KVVVVAAAADDEEGGGG	1	AGG	R	K	232	351214	No	tRNA(CCU) appears to be arginine-type due to A20				0.67
GCA_004299745.1-AGG	1883446	B	GCA_004299745.1	Rhodanobacter sp.	FALSE	FFLLSSSSYY**CC*WLLLLPPPPHHQQRRRRIIIMTTTTNNKKSSRRVVVVAAAADDEEGGGG	FFLLSSSSYY??CC?WLLLLPPPPHHQQRRRRIIIMTTTTNNKKSS?KVVVVAAAADDEEGGGG	1	AGG	R	K	472	370644	No	tRNA(CCU) appears to be arginine-type due to A20				0.68
GCA_004322005.1-AGG	1883446	B	GCA_004322005.1	Rhodanobacter sp.	FALSE	FFLLSSSSYY**CC*WLLLLPPPPHHQQRRRRIIIMTTTTNNKKSSRRVVVVAAAADDEEGGGG	FFLLSSSSYY??CC?WLLLLPPPPHHQQRRRRIIIMTTTTNNKKSSRKVVVVAAAADDEEGGGG	1	AGG	R	K	757	385538	No	tRNA(CCU) appears to be arginine-type due to A20				0.65
GCA_009360655.1-AGG	1886637	B	GCA_009360655.1	Delftia sp.	FALSE	FFLLSSSSYY**CC*WLLLLPPPPHHQQRRRRIIIMTTTTNNKKSSRRVVVVAAAADDEEGGGG	FFLLSSSSYY??CC?WLLLLPPPPHHQQRRRRIIIMTTTTNNKKSSRKVVVVAAAADDEEGGGG	1	AGG	R	K	959	543483	No	tRNA(CCU) appears to be arginine-type due to A20				0.67
GCA_003577305.1-AGG	1891238	B	GCA_003577305.1	Burkholderiales bacterium	FALSE	FFLLSSSSYY**CC*WLLLLPPPPHHQQRRRRIIIMTTTTNNKKSSRRVVVVAAAADDEEGGGG	FFLLSSSSYY??CC?WLLLLPPPPHHQQRRRRIIIMTTTTNNKKSSRKVVVVAAAADDEEGGGG	1	AGG	R	K	1104	353888	No	tRNA(CCU) appears to be arginine-type due to A20				0.69
GCA_003818515.1-AGG	1891238	B	GCA_003818515.1	Burkholderiales bacterium	FALSE	FFLLSSSSYY**CC*WLLLLPPPPHHQQRRRRIIIMTTTTNNKKSSRRVVVVAAAADDEEGGGG	FF?LSSSSYY??CC?WLLLLPPPPHHQQRRRRIIIMTTTTNNKKSSRKVVVVAAAADDEEGGGG	1	AGG	R	K	1404	431776	No	tRNA(CCU) appears to be arginine-type due to A20				0.7
GCA_005778885.1-AGG	1891238	B	GCA_005778885.1	Burkholderiales bacterium	FALSE	FFLLSSSSYY**CC*WLLLLPPPPHHQQRRRRIIIMTTTTNNKKSSRRVVVVAAAADDEEGGGG	FF?LSSSSYY??CC?WLLLLPPPPHHQQRRRRII?MTTTTNNKKSS?KVVVVAAAADDEEGGGG	1	AGG	R	K	249	182472	No	tRNA(CCU) appears to be arginine-type due to A20				0.72
GCA_005788965.1-AGG	1891238	B	GCA_005788965.1	Burkholderiales bacterium	FALSE	FFLLSSSSYY**CC*WLLLLPPPPHHQQRRRRIIIMTTTTNNKKSSRRVVVVAAAADDEEGGGG	FFLLSSSSYY??CC?WLLLLPPPPHHQQRRRRIIIMTTTTNNKKSSRKVVVVAAAADDEEGGGG	1	AGG	R	K	400	282178	Missing	No tRNA(CCU) or tRNA(UCU)				0.6
GCA_005789935.1-AGG	1891238	B	GCA_005789935.1	Burkholderiales bacterium	FALSE	FFLLSSSSYY**CC*WLLLLPPPPHHQQRRRRIIIMTTTTNNKKSSRRVVVVAAAADDEEGGGG	FF?LSSSSYY??CC?WLL?LPPPPHHQQRRRRIIIMTTTTNNKKSS?KVVVVAAAADDEEGGGG	1	AGG	R	K	216	99472	Missing	No tRNA(CCU) or tRNA(UCU)				0.67
GCA_005789965.1-AGG	1891238	B	GCA_005789965.1	Burkholderiales bacterium	FALSE	FFLLSSSSYY**CC*WLLLLPPPPHHQQRRRRIIIMTTTTNNKKSSRRVVVVAAAADDEEGGGG	FFLLSSSSYY??CC?WLLLLPPPPHHQQRRRRIIIMTTTTNNKKSS?KVVVVAAAADDEEGGGG	1	AGG	R	K	200	67523	Missing	No tRNA(CCU) or tRNA(UCU)				0.64
GCA_005797925.1-AGG	1891238	B	GCA_005797925.1	Burkholderiales bacterium	FALSE	FFLLSSSSYY**CC*WLLLLPPPPHHQQRRRRIIIMTTTTNNKKSSRRVVVVAAAADDEEGGGG	FFLLSSSSYY??CC?WLLLLPPPPHHQQRRRRIIIMTTTTNNKKSSRKVVVVAAAADDEEGGGG	1	AGG	R	K	652	464054	Missing	No tRNA(CCU) or tRNA(UCU)				0.59
GCA_005798125.1-AGG	1891238	B	GCA_005798125.1	Burkholderiales bacterium	FALSE	FFLLSSSSYY**CC*WLLLLPPPPHHQQRRRRIIIMTTTTNNKKSSRRVVVVAAAADDEEGGGG	FF?LSSSSYY??CC?WLLLLPPPPHHQQRRRRIIIMTTTTNNKKSS?KVVVVAAAADDEEGGGG	1	AGG	R	K	634	153998	Missing	No tRNA(CCU) or tRNA(UCU)				0.69
GCA_006227825.1-AGG	1891238	B	GCA_006227825.1	Burkholderiales bacterium	FALSE	FFLLSSSSYY**CC*WLLLLPPPPHHQQRRRRIIIMTTTTNNKKSSRRVVVVAAAADDEEGGGG	FF?LSSSSYY??CC?WLLLLPPPPHHQQRRRRIIIMTTTTNNKKSSRKVVVVAAAADDEEGGGG	1	AGG	R	K	1380	374522	No	tRNA(CCU) appears to be arginine-type due to A20				0.69
GCA_003820645.1-AGG	1891241	B	GCA_003820645.1	Betaproteobacteria bacterium	FALSE	FFLLSSSSYY**CC*WLLLLPPPPHHQQRRRRIIIMTTTTNNKKSSRRVVVVAAAADDEEGGGG	FFLLSSSSYY??CC?WLLLLPPPPHHQQRRRRIIIMTTTTNNKKSSKKVVVVAAAADDEEGGGG	2	AGG	R	K	941	428078	No	No tRNA(CCU), Arg-type tRNA(UCU)				0.63
GCA_004295105.1-AGG	1891241	B	GCA_004295105.1	Betaproteobacteria bacterium	FALSE	FFLLSSSSYY**CC*WLLLLPPPPHHQQRRRRIIIMTTTTNNKKSSRRVVVVAAAADDEEGGGG	FFLLSSSSYY??CC?WLLLLPPPPHHQQRRRRIIIMTTTTNNKKSSRKVVVVAAAADDEEGGGG	1	AGG	R	K	971	476821	No	tRNA(CCU) appears to be arginine-type due to A20				0.67
GCA_004298295.1-AGG	1891241	B	GCA_004298295.1	Betaproteobacteria bacterium	FALSE	FFLLSSSSYY**CC*WLLLLPPPPHHQQRRRRIIIMTTTTNNKKSSRRVVVVAAAADDEEGGGG	FFLLSSSSYY??CC?WLLLLPPPPHHQQRRRRIIIMTTTTNNKKSS?KVVVVAAAADDEEGGGG	1	AGG	R	K	905	321164	No	No tRNA(CCU), Arg-type tRNA(UCU)				0.68
GCA_004298325.1-AGG	1891241	B	GCA_004298325.1	Betaproteobacteria bacterium	FALSE	FFLLSSSSYY**CC*WLLLLPPPPHHQQRRRRIIIMTTTTNNKKSSRRVVVVAAAADDEEGGGG	FFLLSSSSYY??CC?WLLLLPPPPHHQQRRRRIIIMTTTTNNKKSSRKVVVVAAAADDEEGGGG	1	AGG	R	K	1501	491428	No	tRNA(CCU) appears to be arginine-type due to A20				0.68
GCA_005884255.1-AGG	1891241	B	GCA_005884255.1	Betaproteobacteria bacterium	FALSE	FFLLSSSSYY**CC*WLLLLPPPPHHQQRRRRIIIMTTTTNNKKSSRRVVVVAAAADDEEGGGG	FFLLSSSSYY??CC?WLLLLPPPPHHQQRRRRIIIMTTTTNNKKSSRKVVVVAAAADDEEGGGG	1	AGG	R	K	486	510726	No	tRNA(CCU) appears to be arginine-type due to A20				0.69
GCA_009779235.1-AGG	1891241	B	GCA_009779235.1	Betaproteobacteria bacterium	FALSE	FFLLSSSSYY**CC*WLLLLPPPPHHQQRRRRIIIMTTTTNNKKSSRRVVVVAAAADDEEGGGG	FFLLSSSSYY??CC?WLLLLPPPPHHQQRRRRIIIMTTTTNNKKSSRKVVVVAAAADDEEGGGG	1	AGG	R	K	409	312750	No	tRNA(CCU) appears to be arginine-type due to A20				0.63
GCA_009779265.1-AGG	1891241	B	GCA_009779265.1	Betaproteobacteria bacterium	FALSE	FFLLSSSSYY**CC*WLLLLPPPPHHQQRRRRIIIMTTTTNNKKSSRRVVVVAAAADDEEGGGG	FFLLSSSSYY??CC?WLLLLPPPPHHQQRRRRIIIMTTTTNNKKSSRKVVVVAAAADDEEGGGG	1	AGG	R	K	385	298982	No	tRNA(CCU) appears to be arginine-type due to A20				0.63
GCA_009781415.1-AGG	1891241	B	GCA_009781415.1	Betaproteobacteria bacterium	FALSE	FFLLSSSSYY**CC*WLLLLPPPPHHQQRRRRIIIMTTTTNNKKSSRRVVVVAAAADDEEGGGG	FFLLSSSSYY??CC?WLLLLPPPPHHQQRRRRIIIMTTTTNNKKSS?KVVVVAAAADDEEGGGG	1	AGG	R	K	300	207133	No	tRNA(CCU) appears to be arginine-type due to A20				0.64
GCA_011046905.1-AGG	1891241	B	GCA_011046905.1	Betaproteobacteria bacterium	FALSE	FFLLSSSSYY**CC*WLLLLPPPPHHQQRRRRIIIMTTTTNNKKSSRRVVVVAAAADDEEGGGG	FFLLSSSSYY??CC?WLLLLPPPPHHQQRRRRIIIMTTTTNNKKSSRKVVVVAAAADDEEGGGG	1	AGG	R	K	1616	484720	No	tRNA(CCU) appears to be arginine-type due to A20				0.66
GCA_011330925.1-AGG	1891241	B	GCA_011330925.1	Betaproteobacteria bacterium	FALSE	FFLLSSSSYY**CC*WLLLLPPPPHHQQRRRRIIIMTTTTNNKKSSRRVVVVAAAADDEEGGGG	FFLLSSSSYY??CC?WLLLLPPPPHHQQRRRRIIIMTTTTNNKKSSRKVVVVAAAADDEEGGGG	1	AGG	R	K	1032	216665	No	No tRNA(CCU), Arg-type tRNA(UCU)				0.67
GCA_001897775.1-AGG	1895703	B	GCA_001897775.1	Alicycliphilus sp. 69-12	TRUE	FFLLSSSSYY**CC*WLLLLPPPPHHQQRRRRIIIMTTTTNNKKSSRRVVVVAAAADDEEGGGG	FFLLSSSSYY??CC?WLLLLPPPPHHQQRRRRIIIMTTTTNNKKSSRKVVVVAAAADDEEGGGG	1	AGG	R	K	1266	502706	No	tRNA(CCU) appears to be arginine-type due to A20				0.69
GCA_001896865.1-AGG	1895709	B	GCA_001896865.1	Alphaproteobacteria bacterium 64-11	TRUE	FFLLSSSSYY**CC*WLLLLPPPPHHQQRRRRIIIMTTTTNNKKSSRRVVVVAAAADDEEGGGG	FFLLSSSSYY??CC?WLLLLPPPPHHQQRRRRIIIMTTTTNNKKSSRKVVVVAAAADDEEGGGG	1	AGG	R	K	1190	321373	No	tRNA(CCU) appears to be arginine-type due to A20				0.64
GCA_001896805.1-AGG	1895712	B	GCA_001896805.1	Alphaproteobacteria bacterium 65-7	TRUE	FFLLSSSSYY**CC*WLLLLPPPPHHQQRRRRIIIMTTTTNNKKSSRRVVVVAAAADDEEGGGG	FFLLSSSSYY??CC?WLLLLPPPPHHQQRRRRIIIMTTTTNNKKSSRKVVVVAAAADDEEGGGG	1	AGG	R	K	269	218553	No	tRNA(CCU) appears to be arginine-type due to A20				0.66
GCA_001898655.1-AGG	1895727	B	GCA_001898655.1	Burkholderiales bacterium 66-26	TRUE	FFLLSSSSYY**CC*WLLLLPPPPHHQQRRRRIIIMTTTTNNKKSSRRVVVVAAAADDEEGGGG	FFLLSSSSYY??CC?WLLLLPPPPHHQQRRRRIIIMTTTTNNKKSSRKVVVVAAAADDEEGGGG	1	AGG	R	K	843	392712	No	tRNA(CCU) appears to be arginine-type due to A20				0.66
GCA_001898415.1-AGG	1895822	B	GCA_001898415.1	Rhodanobacter sp. 67-28	TRUE	FFLLSSSSYY**CC*WLLLLPPPPHHQQRRRRIIIMTTTTNNKKSSRRVVVVAAAADDEEGGGG	FFLLSSSSYY??CC?WLLLLPPPPHHQQRRRRIIIMTTTTNNKKSS?KVVVVAAAADDEEGGGG	1	AGG	R	K	476	398969	No	tRNA(CCU) appears to be arginine-type due to A20				0.67
GCA_001899565.1-AGG	1895823	B	GCA_001899565.1	Rhodanobacter sp. 68-29	TRUE	FFLLSSSSYY**CC*WLLLLPPPPHHQQRRRRIIIMTTTTNNKKSSRRVVVVAAAADDEEGGGG	FFLLSSSSYY??CC?WLLLLPPPPHHQQRRRRIIIMTTTTNNKKSS?KVVVVAAAADDEEGGGG	1	AGG	R	K	560	380609	No	tRNA(CCU) appears to be arginine-type due to A20				0.69
GCA_001899765.1-AGG	1895859	B	GCA_001899765.1	Thiobacillus sp. 63-78	TRUE	FFLLSSSSYY**CC*WLLLLPPPPHHQQRRRRIIIMTTTTNNKKSSRRVVVVAAAADDEEGGGG	FFLLSSSSYY??CC?WLLLLPPPPHHQQRRRRIIIMTTTTNNKKSSRKVVVVAAAADDEEGGGG	1	AGG	R	K	939	372331	No	tRNA(CCU) appears to be arginine-type due to A20				0.63
GCA_001899775.1-AGG	1895862	B	GCA_001899775.1	Thiobacillus sp. 65-29	TRUE	FFLLSSSSYY**CC*WLLLLPPPPHHQQRRRRIIIMTTTTNNKKSSRRVVVVAAAADDEEGGGG	FFLLSSSSYY??CC?WLLLLPPPPHHQQRRRRIIIMTTTTNNKKSSRKVVVVAAAADDEEGGGG	1	AGG	R	K	617	332276	No	tRNA(CCU) appears to be arginine-type due to A20				0.65
GCA_001897705.1-AGG	1895863	B	GCA_001897705.1	Thiobacillus sp. 65-69	TRUE	FFLLSSSSYY**CC*WLLLLPPPPHHQQRRRRIIIMTTTTNNKKSSRRVVVVAAAADDEEGGGG	FFLLSSSSYY??CC?WLLLLPPPPHHQQRRRRIIIMTTTTNNKKSS?KVVVVAAAADDEEGGGG	1	AGG	R	K	517	343588	No	tRNA(CCU) appears to be arginine-type due to A20				0.65
GCA_001899855.1-AGG	1895867	B	GCA_001899855.1	Xanthomonadales bacterium 63-13	TRUE	FFLLSSSSYY**CC*WLLLLPPPPHHQQRRRRIIIMTTTTNNKKSSRRVVVVAAAADDEEGGGG	FFLLSSSSYY??CC?WLLLLPPPPHHQQRRRRIIIMTTTTNNKKSSRKVVVVAAAADDEEGGGG	1	AGG	R	K	618	370636	No	tRNA(CCU) appears to be arginine-type due to A20				0.63
GCA_001899805.1-AGG	1895868	B	GCA_001899805.1	Xanthomonadales bacterium 66-474	TRUE	FFLLSSSSYY**CC*WLLLLPPPPHHQQRRRRIIIMTTTTNNKKSSRRVVVVAAAADDEEGGGG	FFLLSSSSYY??CC?WLLLLPPPPHHQQRRRRIIIMTTTTNNKKSSRKVVVVAAAADDEEGGGG	1	AGG	R	K	791	360039	No	tRNA(CCU) appears to be arginine-type due to A20				0.66
GCA_001899845.1-AGG	1895869	B	GCA_001899845.1	Xanthomonadales bacterium 69-70	TRUE	FFLLSSSSYY**CC*WLLLLPPPPHHQQRRRRIIIMTTTTNNKKSSRRVVVVAAAADDEEGGGG	FFLLSSSSYY??CC?WLLLLPPPPHHQQRRRRIIIMTTTTNNKKSSRKVVVVAAAADDEEGGGG	1	AGG	R	K	360	429801	No	tRNA(CCU) appears to be arginine-type due to A20				0.69
GCA_001917095.1-AGG	1897022	B	GCA_001917095.1	Subdoligranulum sp. 60_17	TRUE	FFLLSSSSYY**CC*WLLLLPPPPHHQQRRRRIIIMTTTTNNKKSSRRVVVVAAAADDEEGGGG	FFLLSSSSYY??CC?WLLLLPPPPHHQQRRRRIIIMTTTTNNKKSSRKVVVVAAAADDEEGGGG	1	AGG	R	K	277	208676	No	tRNA(CCU) appears to be arginine-type due to A20				0.6
GCA_001916705.1-AGG	1897031	B	GCA_001916705.1	Firmicutes bacterium CAG:176_63_11	TRUE	FFLLSSSSYY**CC*WLLLLPPPPHHQQRRRRIIIMTTTTNNKKSSRRVVVVAAAADDEEGGGG	FFLLSSSSYY??CC?WLLLLPPPPHHQQRRRRIIIMTTTTNNKKSSRKVVVVAAAADDEEGGGG	1	AGG	R	K	323	182100	No	tRNA(CCU) appears to be arginine-type due to A20				0.62
GCA_003963015.1-AGG	1898103	B	GCA_003963015.1	Rhodocyclaceae bacterium	FALSE	FFLLSSSSYY**CC*WLLLLPPPPHHQQRRRRIIIMTTTTNNKKSSRRVVVVAAAADDEEGGGG	FFLLSSSSYY??CC?WLLLLPPPPHHQQRRRRIIIMTTTTNNKKSSRKVVVVAAAADDEEGGGG	1	AGG	R	K	591	475718	No	tRNA(CCU) appears to be arginine-type due to A20				0.68
GCA_006969625.1-AGG	1898112	B	GCA_006969625.1	Rhodospirillaceae bacterium	FALSE	FFLLSSSSYY**CC*WLLLLPPPPHHQQRRRRIIIMTTTTNNKKSSRRVVVVAAAADDEEGGGG	FFLLSSSSYY??CC?WLLLLPPPPHHQQRRRRIIIMTTTTNNKKSSRKVVVVAAAADDEEGGGG	1	AGG	R	K	528	422472	No	tRNA(CCU) appears to be arginine-type due to A20				0.7
GCA_009773145.1-AGG	1898112	B	GCA_009773145.1	Rhodospirillaceae bacterium	FALSE	FFLLSSSSYY**CC*WLLLLPPPPHHQQRRRRIIIMTTTTNNKKSSRRVVVVAAAADDEEGGGG	FFLLSSSSYY??CC?WLLLLPPPPHHQQRRRRIIIMTTTTNNKKSSRKVVVVAAAADDEEGGGG	1	AGG	R	K	556	146935	No	No tRNA(CCU), Arg-type tRNA(UCU)				0.59
GCA_007693945.1-AGG	1898206	B	GCA_007693945.1	Spirochaetaceae bacterium	FALSE	FFLLSSSSYY**CC*WLLLLPPPPHHQQRRRRIIIMTTTTNNKKSSRRVVVVAAAADDEEGGGG	FFLLSSSSYY??CC?WLLLLPPPPHHQQRRRRIIIMTTTTNNKKSSRKVVVVAAAADDEEGGGG	1	AGG	R	K	1428	373700	No	tRNA(CCU) appears to be arginine-type due to A20				0.61
GCA_003534675.1-AGG	1898207	B	GCA_003534675.1	Clostridiales bacterium	FALSE	FFLLSSSSYY**CC*WLLLLPPPPHHQQRRRRIIIMTTTTNNKKSSRRVVVVAAAADDEEGGGG	FFLLSSSSYY??CC?WLLLLPPPPHHQQRRRRIIIMTTTTNNKKSSRKVVVVAAAADDEEGGGG	1	AGG	R	K	105	199246	No	tRNA(CCU) appears to be arginine-type due to A20				0.62
GCA_004551705.1-AGG	1898207	B	GCA_004551705.1	Clostridiales bacterium	FALSE	FFLLSSSSYY**CC*WLLLLPPPPHHQQRRRRIIIMTTTTNNKKSSRRVVVVAAAADDEEGGGG	FFLLSSSSYY??CC?WLLLLPPPPHHQQRRRRIIIMTTTTNNKKSSRKVVVVAAAADDEEGGGG	1	AGG	R	K	279	163052	Missing	No tRNA(CCU) or tRNA(UCU)				0.62
GCA_004552685.1-AGG	1898207	B	GCA_004552685.1	Clostridiales bacterium	FALSE	FFLLSSSSYY**CC*WLLLLPPPPHHQQRRRRIIIMTTTTNNKKSSRRVVVVAAAADDEEGGGG	FFLLSSSSYY??CC?WLLLLPPPPHHQQRRRRIIIMTTTTNNKKSSRKVVVVAAAADDEEGGGG	1	AGG	R	K	240	180416	No	tRNA(CCU) appears to be arginine-type due to A20				0.61
GCA_004552845.1-AGG	1898207	B	GCA_004552845.1	Clostridiales bacterium	FALSE	FFLLSSSSYY**CC*WLLLLPPPPHHQQRRRRIIIMTTTTNNKKSSRRVVVVAAAADDEEGGGG	FFLLSSSSYY??CC?WLLLLPPPPHHQQRRRRIIIMTTTTNNKKSSRKVVVVAAAADDEEGGGG	1	AGG	R	K	226	168513	No	No tRNA(CCU), Arg-type tRNA(UCU)				0.61
GCA_004553965.1-AGG	1898207	B	GCA_004553965.1	Clostridiales bacterium	FALSE	FFLLSSSSYY**CC*WLLLLPPPPHHQQRRRRIIIMTTTTNNKKSSRRVVVVAAAADDEEGGGG	FFLLSSSSYY??CC?WLLLLPPPPHHQQRRRRIIIMTTTTNNKKSSRKVVVVAAAADDEEGGGG	1	AGG	R	K	201	152145	Missing	No tRNA(CCU) or tRNA(UCU)				0.61
GCA_004554015.1-AGG	1898207	B	GCA_004554015.1	Clostridiales bacterium	FALSE	FFLLSSSSYY**CC*WLLLLPPPPHHQQRRRRIIIMTTTTNNKKSSRRVVVVAAAADDEEGGGG	FFLLSSSSYY??CC?WLLLLPPPPHHQQRRRRIIIMTTTTNNKKSSRKVVVVAAAADDEEGGGG	1	AGG	R	K	332	192375	No	No tRNA(CCU), Arg-type tRNA(UCU)				0.63
GCA_004555525.1-AGG	1898207	B	GCA_004555525.1	Clostridiales bacterium	FALSE	FFLLSSSSYY**CC*WLLLLPPPPHHQQRRRRIIIMTTTTNNKKSSRRVVVVAAAADDEEGGGG	FFLLSSSSYY??CC?WLLLLPPPPHHQQRRRRIIIMTTTTNNKKSSRKVVVVAAAADDEEGGGG	1	AGG	R	K	299	154935	No	tRNA(CCU) appears to be arginine-type due to A20				0.63
GCA_004556615.1-AGG	1898207	B	GCA_004556615.1	Clostridiales bacterium	FALSE	FFLLSSSSYY**CC*WLLLLPPPPHHQQRRRRIIIMTTTTNNKKSSRRVVVVAAAADDEEGGGG	FFLLSSSSYY??CC?WLLLLPPPPHHQQRRRRIIIMTTTTNNKKSSRKVVVVAAAADDEEGGGG	1	AGG	R	K	282	221309	No	tRNA(CCU) appears to be arginine-type due to A20				0.6
GCA_004557615.1-AGG	1898207	B	GCA_004557615.1	Clostridiales bacterium	FALSE	FFLLSSSSYY**CC*WLLLLPPPPHHQQRRRRIIIMTTTTNNKKSSRRVVVVAAAADDEEGGGG	FFLLSSSSYY??CC?WLLLLPPPPHHQQRRRRIIIMTTTTNNKKSSRKVVVVAAAADDEEGGGG	1	AGG	R	K	289	175288	No	tRNA(CCU) appears to be arginine-type due to A20				0.61
GCA_004557715.1-AGG	1898207	B	GCA_004557715.1	Clostridiales bacterium	FALSE	FFLLSSSSYY**CC*WLLLLPPPPHHQQRRRRIIIMTTTTNNKKSSRRVVVVAAAADDEEGGGG	FFLLSSSSYY??CC?WLLLLPPPPHHQQRRRRIIIMTTTTNNKKSSRKVVVVAAAADDEEGGGG	1	AGG	R	K	124	193880	No	tRNA(CCU) appears to be arginine-type due to A20				0.62
GCA_004557735.1-AGG	1898207	B	GCA_004557735.1	Clostridiales bacterium	FALSE	FFLLSSSSYY**CC*WLLLLPPPPHHQQRRRRIIIMTTTTNNKKSSRRVVVVAAAADDEEGGGG	FFLLSSSSYY??CC?WLLLLPPPPHHQQRRRRIIIMTTTTNNKKSSRKVVVVAAAADDEEGGGG	1	AGG	R	K	372	226979	No	tRNA(CCU) appears to be arginine-type due to A20				0.6
GCA_008015535.1-AGG	1898956	B	GCA_008015535.1	Ottowia sp.	TRUE	FFLLSSSSYY**CC*WLLLLPPPPHHQQRRRRIIIMTTTTNNKKSSRRVVVVAAAADDEEGGGG	FF?LSSSSYY??CC?WLLLLPPPPHHQQRRRRIIIMTTTTNNKKSS?KVVVVAAAADDEEGGGG	1	AGG	R	K	296	295342	Missing	No tRNA(CCU) or tRNA(UCU)				0.7
GCA_008015555.1-AGG	1898956	B	GCA_008015555.1	Ottowia sp.	FALSE	FFLLSSSSYY**CC*WLLLLPPPPHHQQRRRRIIIMTTTTNNKKSSRRVVVVAAAADDEEGGGG	FFLLSSSSYY??CC?WLLLLPPPPHHQQRRRRIIIMTTTTNNKKSSRKVVVVAAAADDEEGGGG	1	AGG	R	K	281	280383	Missing	No tRNA(CCU) or tRNA(UCU)				0.69
GCA_002005325.1-AGG	1902579	B	GCA_002005325.1	Candidatus Tokpelaia hoelldoblerii	TRUE	FFLLSSSSYY**CC*WLLLLPPPPHHQQRRRRIIIMTTTTNNKKSSRRVVVVAAAADDEEGGGG	FFLLSSSSYY??CC?WLLLLPPPPHHQQRRRRIIIMTTTTNNKKSSRKVVVVAAAADDEEGGGG	1	AGG	R	K	723	249371	No	tRNA(CCU) appears to be arginine-type due to A20				0.53
GCA_011773685.1-AGG	1904254	B	GCA_011773685.1	Hydrogenophaga sp.	TRUE	FFLLSSSSYY**CC*WLLLLPPPPHHQQRRRRIIIMTTTTNNKKSSRRVVVVAAAADDEEGGGG	FFLLSSSSYY??CC?WLLLLPPPPHHQQRRRRIIIMTTTTNNKKSS?KVVVVAAAADDEEGGGG	1	AGG	R	K	358	452095	No	tRNA(CCU) appears to be arginine-type due to A20				0.69
GCA_011391495.1-AGG	1904254	B	GCA_011391495.1	Hydrogenophaga sp.	FALSE	FFLLSSSSYY**CC*WLLLLPPPPHHQQRRRRIIIMTTTTNNKKSSRRVVVVAAAADDEEGGGG	FFLLSSSSYY??CC?WLLLLPPPPHHQQRRRRIIIMTTTTNNKKSSRKVVVVAAAADDEEGGGG	1	AGG	R	K	527	359673	No	No tRNA(CCU), Arg-type tRNA(UCU)				0.66
GCA_011771315.1-AGG	1904254	B	GCA_011771315.1	Hydrogenophaga sp.	FALSE	FFLLSSSSYY**CC*WLLLLPPPPHHQQRRRRIIIMTTTTNNKKSSRRVVVVAAAADDEEGGGG	FFLLSSSSYY??CC?WLLLLPPPPHHQQRRRRIIIMTTTTNNKKSS?KVVVVAAAADDEEGGGG	1	AGG	R	K	358	452095	No	tRNA(CCU) appears to be arginine-type due to A20				0.69
GCA_011771805.1-AGG	1904254	B	GCA_011771805.1	Hydrogenophaga sp.	FALSE	FFLLSSSSYY**CC*WLLLLPPPPHHQQRRRRIIIMTTTTNNKKSSRRVVVVAAAADDEEGGGG	FFLLSSSSYY??CC?WLLLLPPPPHHQQRRRRIIIMTTTTNNKKSS?KVVVVAAAADDEEGGGG	1	AGG	R	K	357	453597	No	tRNA(CCU) appears to be arginine-type due to A20				0.69
GCA_011772065.1-AGG	1904254	B	GCA_011772065.1	Hydrogenophaga sp.	FALSE	FFLLSSSSYY**CC*WLLLLPPPPHHQQRRRRIIIMTTTTNNKKSSRRVVVVAAAADDEEGGGG	FFLLSSSSYY??CC?WLLLLPPPPHHQQRRRRIIIMTTTTNNKKSS?KVVVVAAAADDEEGGGG	1	AGG	R	K	368	455052	No	tRNA(CCU) appears to be arginine-type due to A20				0.69
GCA_011772445.1-AGG	1904254	B	GCA_011772445.1	Hydrogenophaga sp.	FALSE	FFLLSSSSYY**CC*WLLLLPPPPHHQQRRRRIIIMTTTTNNKKSSRRVVVVAAAADDEEGGGG	FF?LSSSSYY??CC?WLLLLPPPPHHQQRRRRIIIMTTTTNNKKSS?KVVVVAAAADDEEGGGG	1	AGG	R	K	351	450905	No	tRNA(CCU) appears to be arginine-type due to A20				0.69
GCA_011772725.1-AGG	1904254	B	GCA_011772725.1	Hydrogenophaga sp.	FALSE	FFLLSSSSYY**CC*WLLLLPPPPHHQQRRRRIIIMTTTTNNKKSSRRVVVVAAAADDEEGGGG	FFLLSSSSYY??CC?WLLLLPPPPHHQQRRRRIIIMTTTTNNKKSS?KVVVVAAAADDEEGGGG	1	AGG	R	K	362	452035	No	tRNA(CCU) appears to be arginine-type due to A20				0.69
GCA_011773045.1-AGG	1904254	B	GCA_011773045.1	Hydrogenophaga sp.	FALSE	FFLLSSSSYY**CC*WLLLLPPPPHHQQRRRRIIIMTTTTNNKKSSRRVVVVAAAADDEEGGGG	FFLLSSSSYY??CC?WLLLLPPPPHHQQRRRRIIIMTTTTNNKKSS?KVVVVAAAADDEEGGGG	1	AGG	R	K	366	454761	No	tRNA(CCU) appears to be arginine-type due to A20				0.69
GCA_011773215.1-AGG	1904254	B	GCA_011773215.1	Hydrogenophaga sp.	FALSE	FFLLSSSSYY**CC*WLLLLPPPPHHQQRRRRIIIMTTTTNNKKSSRRVVVVAAAADDEEGGGG	FFLLSSSSYY??CC?WLLLLPPPPHHQQRRRRIIIMTTTTNNKKSS?KVVVVAAAADDEEGGGG	1	AGG	R	K	354	450892	No	tRNA(CCU) appears to be arginine-type due to A20				0.69
GCA_011774025.1-AGG	1904254	B	GCA_011774025.1	Hydrogenophaga sp.	FALSE	FFLLSSSSYY**CC*WLLLLPPPPHHQQRRRRIIIMTTTTNNKKSSRRVVVVAAAADDEEGGGG	FFLLSSSSYY??CC?WLLLLPPPPHHQQRRRRIIIMTTTTNNKKSS?KVVVVAAAADDEEGGGG	1	AGG	R	K	358	454692	No	tRNA(CCU) appears to be arginine-type due to A20				0.69
GCA_003551925.1-AGG	1904441	B	GCA_003551925.1	Rhodobacteraceae bacterium	FALSE	FFLLSSSSYY**CC*WLLLLPPPPHHQQRRRRIIIMTTTTNNKKSSRRVVVVAAAADDEEGGGG	FFLLSSSSYY??CC?WLLLLPPPPHHQQRRRRIIIMTTTTNNKKSSRKVVVVAAAADDEEGGGG	1	AGG	R	K	445	366662	No	No tRNA(CCU), Arg-type tRNA(UCU)				0.7
GCA_003565875.1-AGG	1904441	B	GCA_003565875.1	Rhodobacteraceae bacterium	FALSE	FFLLSSSSYY**CC*WLLLLPPPPHHQQRRRRIIIMTTTTNNKKSSRRVVVVAAAADDEEGGGG	FFLLSSSSYY??CC?WLLLLPPPPHHQQRRRRIIIMTTTTNNKKSSRKVVVVAAAADDEEGGGG	1	AGG	R	K	309	272700	Missing	No tRNA(CCU) or tRNA(UCU)				0.7
GCA_007126615.1-AGG	1904441	B	GCA_007126615.1	Rhodobacteraceae bacterium	FALSE	FFLLSSSSYY**CC*WLLLLPPPPHHQQRRRRIIIMTTTTNNKKSSRRVVVVAAAADDEEGGGG	FF?LSSSSYY??CC?WLL?LPPPPHHQQRRRRIIIMTTTTNNKKSS?KVVVVAAAADDEEGGGG	1	AGG	R	K	269	237615	No	tRNA(CCU) appears to be arginine-type due to A20				0.69
GCA_003235415.1-AGG	1909294	B	GCA_003235415.1	Rhizobiales bacterium	FALSE	FFLLSSSSYY**CC*WLLLLPPPPHHQQRRRRIIIMTTTTNNKKSSRRVVVVAAAADDEEGGGG	FFLLSSSSYY??CC?WLLLLPPPPHHQQRRRRIIIMTTTTNNKKSSRKVVVVAAAADDEEGGGG	1	AGG	R	K	790	189068	Missing	No tRNA(CCU) or tRNA(UCU)				0.66
GCA_003577315.1-AGG	1909294	B	GCA_003577315.1	Rhizobiales bacterium	FALSE	FFLLSSSSYY**CC*WLLLLPPPPHHQQRRRRIIIMTTTTNNKKSSRRVVVVAAAADDEEGGGG	FF?LSSSSYY??CC?WLLLLPPPPHHQQRRRRIIIMTTTTNNKKSSRKVVVVAAAADDEEGGGG	1	AGG	R	K	1810	339707	No	tRNA(CCU) appears to be arginine-type due to A20				0.69
GCA_009377755.1-AGG	1909294	B	GCA_009377755.1	Rhizobiales bacterium	FALSE	FFLLSSSSYY**CC*WLLLLPPPPHHQQRRRRIIIMTTTTNNKKSSRRVVVVAAAADDEEGGGG	FFLLSSSSYY??CC?WLLLLPPPPHHQQRRRRIIIMTTTTNNKKSSRKVVVVAAAADDEEGGGG	1	AGG	R	K	1075	525059	No	tRNA(CCU) appears to be arginine-type due to A20				0.65
GCA_011046675.1-AGG	1909294	B	GCA_011046675.1	Rhizobiales bacterium	FALSE	FFLLSSSSYY**CC*WLLLLPPPPHHQQRRRRIIIMTTTTNNKKSSRRVVVVAAAADDEEGGGG	FF?LSSSSYY??CC?WLLLLPPPPHHQQRRRRIIIMTTTTNNKKSSRKVVVVAAAADDEEGGGG	1	AGG	R	K	2117	449810	No	tRNA(CCU) appears to be arginine-type due to A20				0.71
GCA_009695305.1-AGG	1913982	B	GCA_009695305.1	Opitutus sp.	FALSE	FFLLSSSSYY**CC*WLLLLPPPPHHQQRRRRIIIMTTTTNNKKSSRRVVVVAAAADDEEGGGG	FFLLSSSSYY??CC?WLLLLPPPPHHQQRRRRIIIMTTTTNNKKSSRKVVVVAAAADDEEGGGG	1	AGG	R	K	174	343654	No	tRNA(CCU) appears to be arginine-type due to A20				0.65
GCA_003693905.1-AGG	1913988	B	GCA_003693905.1	Alphaproteobacteria bacterium	FALSE	FFLLSSSSYY**CC*WLLLLPPPPHHQQRRRRIIIMTTTTNNKKSSRRVVVVAAAADDEEGGGG	FFLLSSSSYY??CC?WLLLLPPPPHHQQRRRRIIIMTTTTNNKKSSKKVVVVAAAADDEEGGGG	2	AGG	R	K	481	285638	No	tRNA(CCU) appears to be arginine-type due to A20				0.66
GCA_005772685.1-AGG	1913988	B	GCA_005772685.1	Alphaproteobacteria bacterium	FALSE	FFLLSSSSYY**CC*WLLLLPPPPHHQQRRRRIIIMTTTTNNKKSSRRVVVVAAAADDEEGGGG	FFLLSSSSYY??CC?WLLLLPPPPHHQQRRRRIIIMTTTTNNKKSS?KVVVVAAAADDEEGGGG	1	AGG	R	K	1255	392204	No	No tRNA(CCU), Arg-type tRNA(UCU)				0.67
GCA_005790885.1-AGG	1913988	B	GCA_005790885.1	Alphaproteobacteria bacterium	FALSE	FFLLSSSSYY**CC*WLLLLPPPPHHQQRRRRIIIMTTTTNNKKSSRRVVVVAAAADDEEGGGG	FF?LSSSSYY??CC?WLLLLPPPPHHQQRRRRII?MTTTTNNKKSS?KVVVVAAAADDEEGGGG	1	AGG	R	K	102	49598	No	tRNA(CCU) appears to be arginine-type due to A20				0.7
GCA_005792365.1-AGG	1913988	B	GCA_005792365.1	Alphaproteobacteria bacterium	FALSE	FFLLSSSSYY**CC*WLLLLPPPPHHQQRRRRIIIMTTTTNNKKSSRRVVVVAAAADDEEGGGG	FFLLSSSSYY??CC?WLLLLPPPPHHQQRRRRIIIMTTTTNNKKSSKKVVVVAAAADDEEGGGG	2	AGG	R	K	257	76809	Missing	No tRNA(CCU) or tRNA(UCU)				0.69
GCA_005793415.1-AGG	1913988	B	GCA_005793415.1	Alphaproteobacteria bacterium	FALSE	FFLLSSSSYY**CC*WLLLLPPPPHHQQRRRRIIIMTTTTNNKKSSRRVVVVAAAADDEEGGGG	FFLLSSSSYY??CC?WLLLLPPPPHHQQRRRRIIIMTTTTNNKKSS?KVVVVAAAADDEEGGGG	1	AGG	R	K	1101	349796	Missing	No tRNA(CCU) or tRNA(UCU)				0.66
GCA_005798725.1-AGG	1913988	B	GCA_005798725.1	Alphaproteobacteria bacterium	FALSE	FFLLSSSSYY**CC*WLLLLPPPPHHQQRRRRIIIMTTTTNNKKSSRRVVVVAAAADDEEGGGG	FFLLSSSSYY??CC?WLLLLPPPPHHQQRRRRIIIMTTTTNNKKSS?KVVVVAAAADDEEGGGG	1	AGG	R	K	1322	422237	Missing	No tRNA(CCU) or tRNA(UCU)				0.67
GCA_005805225.1-AGG	1913988	B	GCA_005805225.1	Alphaproteobacteria bacterium	FALSE	FFLLSSSSYY**CC*WLLLLPPPPHHQQRRRRIIIMTTTTNNKKSSRRVVVVAAAADDEEGGGG	FFLLSSSSYY??CC?WLLLLPPPPHHQQRRRRIIIMTTTTNNKKSS?KVVVVAAAADDEEGGGG	1	AGG	R	K	1399	449502	No	tRNA(CCU) appears to be arginine-type due to A20				0.67
GCA_005884685.1-AGG	1913988	B	GCA_005884685.1	Alphaproteobacteria bacterium	FALSE	FFLLSSSSYY**CC*WLLLLPPPPHHQQRRRRIIIMTTTTNNKKSSRRVVVVAAAADDEEGGGG	FFLLSSSSYY??CC?WLLLLPPPPHHQQRRRRIIIMTTTTNNKKSSRKVVVVAAAADDEEGGGG	1	AGG	R	K	957	509185	No	tRNA(CCU) appears to be arginine-type due to A20				0.66
GCA_005884705.1-AGG	1913988	B	GCA_005884705.1	Alphaproteobacteria bacterium	FALSE	FFLLSSSSYY**CC*WLLLLPPPPHHQQRRRRIIIMTTTTNNKKSSRRVVVVAAAADDEEGGGG	FFLLSSSSYY??CC?WLLLLPPPPHHQQRRRRIIIMTTTTNNKKSS?KVVVVAAAADDEEGGGG	1	AGG	R	K	1014	500935	Missing	No tRNA(CCU) or tRNA(UCU)				0.68
GCA_009377375.1-AGG	1913988	B	GCA_009377375.1	Alphaproteobacteria bacterium	FALSE	FFLLSSSSYY**CC*WLLLLPPPPHHQQRRRRIIIMTTTTNNKKSSRRVVVVAAAADDEEGGGG	FFLLSSSSYY??CC?WLLLLPPPPHHQQRRRRIIIMTTTTNNKKSSRKVVVVAAAADDEEGGGG	1	AGG	R	K	1406	441679	No	tRNA(CCU) appears to be arginine-type due to A20				0.68
GCA_009380075.1-AGG	1913988	B	GCA_009380075.1	Alphaproteobacteria bacterium	FALSE	FFLLSSSSYY**CC*WLLLLPPPPHHQQRRRRIIIMTTTTNNKKSSRRVVVVAAAADDEEGGGG	FFLLSSSSYY??CC?WLLLLPPPPHHQQRRRRIIIMTTTTNNKKSSRKVVVVAAAADDEEGGGG	1	AGG	R	K	1037	349400	No	tRNA(CCU) appears to be arginine-type due to A20				0.66
GCA_009694055.1-AGG	1913988	B	GCA_009694055.1	Alphaproteobacteria bacterium	FALSE	FFLLSSSSYY**CC*WLLLLPPPPHHQQRRRRIIIMTTTTNNKKSSRRVVVVAAAADDEEGGGG	FFLLSSSSYY??CC?WLLLLPPPPHHQQRRRRIIIMTTTTNNKKSSRKVVVVAAAADDEEGGGG	1	AGG	R	K	145	161804	Missing	No tRNA(CCU) or tRNA(UCU)				0.67
GCA_009781045.1-AGG	1913988	B	GCA_009781045.1	Alphaproteobacteria bacterium	FALSE	FFLLSSSSYY**CC*WLLLLPPPPHHQQRRRRIIIMTTTTNNKKSSRRVVVVAAAADDEEGGGG	FFLLSSSSYY??CC?WLLLLPPPPHHQQRRRRIIIMTTTTNNKKSSRKVVVVAAAADDEEGGGG	1	AGG	R	K	1792	404613	No	tRNA(CCU) appears to be arginine-type due to A20				0.62
GCA_002699185.1-AGG	1913989	B	GCA_002699185.1	Gammaproteobacteria bacterium	FALSE	FFLLSSSSYY**CC*WLLLLPPPPHHQQRRRRIIIMTTTTNNKKSSRRVVVVAAAADDEEGGGG	FFLLSSSSYY??CC?WLLLLPPPPHHQQRRRRIIIMTTTTNNKKSSRKVVVVAAAADDEEGGGG	1	AGG	R	K	801	334176	No	tRNA(CCU) appears to be arginine-type due to A20				0.65
GCA_003232415.1-AGG	1913989	B	GCA_003232415.1	Gammaproteobacteria bacterium	FALSE	FFLLSSSSYY**CC*WLLLLPPPPHHQQRRRRIIIMTTTTNNKKSSRRVVVVAAAADDEEGGGG	FFLLSSSSYY??CC?WLLLLPPPPHHQQRRRRIIIMTTTTNNKKSS?KVVVVAAAADDEEGGGG	1	AGG	R	K	113	71528	Missing	No tRNA(CCU) or tRNA(UCU)				0.61
GCA_003251435.1-AGG	1913989	B	GCA_003251435.1	Gammaproteobacteria bacterium	FALSE	FFLLSSSSYY**CC*WLLLLPPPPHHQQRRRRIIIMTTTTNNKKSSRRVVVVAAAADDEEGGGG	FFLLSSSSYY??CC?WLLLLPPPPHHQQRRRRIIIMTTTTNNKKSSRKVVVVAAAADDEEGGGG	1	AGG	R	K	557	125329	No	tRNA(CCU) appears to be arginine-type due to A20				0.63
GCA_003526065.1-AGG	1913989	B	GCA_003526065.1	Gammaproteobacteria bacterium	FALSE	FFLLSSSSYY**CC*WLLLLPPPPHHQQRRRRIIIMTTTTNNKKSSRRVVVVAAAADDEEGGGG	FFLLSSSSYY??CC?WLLLLPPPPHHQQRRRRIIIMTTTTNNKKSSRKVVVVAAAADDEEGGGG	1	AGG	R	K	258	298639	No	tRNA(CCU) appears to be arginine-type due to A20				0.68
GCA_003542715.1-AGG	1913989	B	GCA_003542715.1	Gammaproteobacteria bacterium	FALSE	FFLLSSSSYY**CC*WLLLLPPPPHHQQRRRRIIIMTTTTNNKKSSRRVVVVAAAADDEEGGGG	FFLLSSSSYY??CC?WLLLLPPPPHHQQRRRRIIIMTTTTNNKKSSRKVVVVAAAADDEEGGGG	1	AGG	R	K	245	206465	Missing	No tRNA(CCU) or tRNA(UCU)				0.6
GCA_003599485.1-AGG	1913989	B	GCA_003599485.1	Gammaproteobacteria bacterium	FALSE	FFLLSSSSYY**CC*WLLLLPPPPHHQQRRRRIIIMTTTTNNKKSSRRVVVVAAAADDEEGGGG	FFLLSSSSYY??CC?WLLLLPPPPHHQQRRRRIIIMTTTTNNKKSSRKVVVVAAAADDEEGGGG	1	AGG	R	K	709	241069	No	tRNA(CCU) appears to be arginine-type due to A20				0.61
GCA_004298065.1-AGG	1913989	B	GCA_004298065.1	Gammaproteobacteria bacterium	FALSE	FFLLSSSSYY**CC*WLLLLPPPPHHQQRRRRIIIMTTTTNNKKSSRRVVVVAAAADDEEGGGG	FFLLSSSSYY??CC?WLLLLPPPPHHQQRRRRIIIMTTTTNNKKSSRKVVVVAAAADDEEGGGG	1	AGG	R	K	353	314386	No	tRNA(CCU) appears to be arginine-type due to A20				0.64
GCA_005799785.1-AGG	1913989	B	GCA_005799785.1	Gammaproteobacteria bacterium	FALSE	FFLLSSSSYY**CC*WLLLLPPPPHHQQRRRRIIIMTTTTNNKKSSRRVVVVAAAADDEEGGGG	FFLLSSSSYY??CC?WLLLLPPPPHHQQRRRRIIIMTTTTNNKKSSRKVVVVAAAADDEEGGGG	1	AGG	R	K	401	137008	Missing	No tRNA(CCU) or tRNA(UCU)				0.61
GCA_005877745.1-AGG	1913989	B	GCA_005877745.1	Gammaproteobacteria bacterium	FALSE	FFLLSSSSYY**CC*WLLLLPPPPHHQQRRRRIIIMTTTTNNKKSSRRVVVVAAAADDEEGGGG	FFLLSSSSYY??CC?WLLLLPPPPHHQQRRRRIIIMTTTTNNKKSSRKVVVVAAAADDEEGGGG	1	AGG	R	K	641	241487	No	No tRNA(CCU), Arg-type tRNA(UCU)				0.68
GCA_005877865.1-AGG	1913989	B	GCA_005877865.1	Gammaproteobacteria bacterium	FALSE	FFLLSSSSYY**CC*WLLLLPPPPHHQQRRRRIIIMTTTTNNKKSSRRVVVVAAAADDEEGGGG	FFLLSSSSYY??CC?WLLLLPPPPHHQQRRRRIIIMTTTTNNKKSSRKVVVVAAAADDEEGGGG	1	AGG	R	K	796	268717	Missing	No tRNA(CCU) or tRNA(UCU)				0.69
GCA_005877955.1-AGG	1913989	B	GCA_005877955.1	Gammaproteobacteria bacterium	FALSE	FFLLSSSSYY**CC*WLLLLPPPPHHQQRRRRIIIMTTTTNNKKSSRRVVVVAAAADDEEGGGG	FFLLSSSSYY??CC?WLLLLPPPPHHQQRRRRIIIMTTTTNNKKSSRKVVVVAAAADDEEGGGG	1	AGG	R	K	924	335326	No	No tRNA(CCU), Arg-type tRNA(UCU)				0.69
GCA_005877965.1-AGG	1913989	B	GCA_005877965.1	Gammaproteobacteria bacterium	FALSE	FFLLSSSSYY**CC*WLLLLPPPPHHQQRRRRIIIMTTTTNNKKSSRRVVVVAAAADDEEGGGG	FFLLSSSSYY??CC?WLLLLPPPPHHQQRRRRIIIMTTTTNNKKSSRKVVVVAAAADDEEGGGG	1	AGG	R	K	854	318149	No	tRNA(CCU) appears to be arginine-type due to A20				0.68
GCA_005877975.1-AGG	1913989	B	GCA_005877975.1	Gammaproteobacteria bacterium	FALSE	FFLLSSSSYY**CC*WLLLLPPPPHHQQRRRRIIIMTTTTNNKKSSRRVVVVAAAADDEEGGGG	FFLLSSSSYY??CC?WLLLLPPPPHHQQRRRRIIIMTTTTNNKKSSRKVVVVAAAADDEEGGGG	1	AGG	R	K	805	291349	Missing	No tRNA(CCU) or tRNA(UCU)				0.69
GCA_005877985.1-AGG	1913989	B	GCA_005877985.1	Gammaproteobacteria bacterium	FALSE	FFLLSSSSYY**CC*WLLLLPPPPHHQQRRRRIIIMTTTTNNKKSSRRVVVVAAAADDEEGGGG	FFLLSSSSYY??CC?WLLLLPPPPHHQQRRRRIIIMTTTTNNKKSSRKVVVVAAAADDEEGGGG	1	AGG	R	K	795	301713	Missing	No tRNA(CCU) or tRNA(UCU)				0.68
GCA_005878055.1-AGG	1913989	B	GCA_005878055.1	Gammaproteobacteria bacterium	FALSE	FFLLSSSSYY**CC*WLLLLPPPPHHQQRRRRIIIMTTTTNNKKSSRRVVVVAAAADDEEGGGG	FFLLSSSSYY??CC?WLLLLPPPPHHQQRRRRIIIMTTTTNNKKSSRKVVVVAAAADDEEGGGG	1	AGG	R	K	1183	418043	No	tRNA(CCU) appears to be arginine-type due to A20				0.67
GCA_005878085.1-AGG	1913989	B	GCA_005878085.1	Gammaproteobacteria bacterium	FALSE	FFLLSSSSYY**CC*WLLLLPPPPHHQQRRRRIIIMTTTTNNKKSSRRVVVVAAAADDEEGGGG	FFLLSSSSYY??CC?WLLLLPPPPHHQQRRRRIIIMTTTTNNKKSSRKVVVVAAAADDEEGGGG	1	AGG	R	K	682	251801	No	No tRNA(CCU), Arg-type tRNA(UCU)				0.7
GCA_005878095.1-AGG	1913989	B	GCA_005878095.1	Gammaproteobacteria bacterium	FALSE	FFLLSSSSYY**CC*WLLLLPPPPHHQQRRRRIIIMTTTTNNKKSSRRVVVVAAAADDEEGGGG	FFLLSSSSYY??CC?WLLLLPPPPHHQQRRRRIIIMTTTTNNKKSSRKVVVVAAAADDEEGGGG	1	AGG	R	K	1077	375948	No	tRNA(CCU) appears to be arginine-type due to A20				0.68
GCA_005878155.1-AGG	1913989	B	GCA_005878155.1	Gammaproteobacteria bacterium	FALSE	FFLLSSSSYY**CC*WLLLLPPPPHHQQRRRRIIIMTTTTNNKKSSRRVVVVAAAADDEEGGGG	FFLLSSSSYY??CC?WLLLLPPPPHHQQRRRRIIIMTTTTNNKKSSRKVVVVAAAADDEEGGGG	1	AGG	R	K	1117	399206	No	tRNA(CCU) appears to be arginine-type due to A20				0.67
GCA_005878185.1-AGG	1913989	B	GCA_005878185.1	Gammaproteobacteria bacterium	FALSE	FFLLSSSSYY**CC*WLLLLPPPPHHQQRRRRIIIMTTTTNNKKSSRRVVVVAAAADDEEGGGG	FFLLSSSSYY??CC?WLLLLPPPPHHQQRRRRIIIMTTTTNNKKSSRKVVVVAAAADDEEGGGG	1	AGG	R	K	770	287557	No	No tRNA(CCU), Arg-type tRNA(UCU)				0.69
GCA_005878285.1-AGG	1913989	B	GCA_005878285.1	Gammaproteobacteria bacterium	FALSE	FFLLSSSSYY**CC*WLLLLPPPPHHQQRRRRIIIMTTTTNNKKSSRRVVVVAAAADDEEGGGG	FFLLSSSSYY??CC?WLLLLPPPPHHQQRRRRIIIMTTTTNNKKSSRKVVVVAAAADDEEGGGG	1	AGG	R	K	1073	374699	No	tRNA(CCU) appears to be arginine-type due to A20				0.67
GCA_005878315.1-AGG	1913989	B	GCA_005878315.1	Gammaproteobacteria bacterium	FALSE	FFLLSSSSYY**CC*WLLLLPPPPHHQQRRRRIIIMTTTTNNKKSSRRVVVVAAAADDEEGGGG	FFLLSSSSYY??CC?WLLLLPPPPHHQQRRRRIIIMTTTTNNKKSSRKVVVVAAAADDEEGGGG	1	AGG	R	K	1162	403145	No	tRNA(CCU) appears to be arginine-type due to A20				0.67
GCA_005878735.1-AGG	1913989	B	GCA_005878735.1	Gammaproteobacteria bacterium	FALSE	FFLLSSSSYY**CC*WLLLLPPPPHHQQRRRRIIIMTTTTNNKKSSRRVVVVAAAADDEEGGGG	FFLLSSSSYY??CC?WLLLLPPPPHHQQRRRRIIIMTTTTNNKKSSRKVVVVAAAADDEEGGGG	1	AGG	R	K	1095	385939	No	tRNA(CCU) appears to be arginine-type due to A20				0.68
GCA_005878745.1-AGG	1913989	B	GCA_005878745.1	Gammaproteobacteria bacterium	FALSE	FFLLSSSSYY**CC*WLLLLPPPPHHQQRRRRIIIMTTTTNNKKSSRRVVVVAAAADDEEGGGG	FFLLSSSSYY??CC?WLLLLPPPPHHQQRRRRIIIMTTTTNNKKSSRKVVVVAAAADDEEGGGG	1	AGG	R	K	1259	436337	No	tRNA(CCU) appears to be arginine-type due to A20				0.67
GCA_005878835.1-AGG	1913989	B	GCA_005878835.1	Gammaproteobacteria bacterium	FALSE	FFLLSSSSYY**CC*WLLLLPPPPHHQQRRRRIIIMTTTTNNKKSSRRVVVVAAAADDEEGGGG	FFLLSSSSYY??CC?WLLLLPPPPHHQQRRRRIIIMTTTTNNKKSSRKVVVVAAAADDEEGGGG	1	AGG	R	K	1204	404235	No	tRNA(CCU) appears to be arginine-type due to A20				0.67
GCA_005878855.1-AGG	1913989	B	GCA_005878855.1	Gammaproteobacteria bacterium	FALSE	FFLLSSSSYY**CC*WLLLLPPPPHHQQRRRRIIIMTTTTNNKKSSRRVVVVAAAADDEEGGGG	FFLLSSSSYY??CC?WLLLLPPPPHHQQRRRRIIIMTTTTNNKKSSRKVVVVAAAADDEEGGGG	1	AGG	R	K	1068	382949	No	No tRNA(CCU), Arg-type tRNA(UCU)				0.68
GCA_011051615.1-AGG	1913989	B	GCA_011051615.1	Gammaproteobacteria bacterium	FALSE	FFLLSSSSYY**CC*WLLLLPPPPHHQQRRRRIIIMTTTTNNKKSSRRVVVVAAAADDEEGGGG	FFLLSSSSYY??CC?WLLLLPPPPHHQQRRRRIIIMTTTTNNKKSSRKVVVVAAAADDEEGGGG	1	AGG	R	K	636	318332	No	tRNA(CCU) appears to be arginine-type due to A20				0.61
GCA_011051765.1-AGG	1913989	B	GCA_011051765.1	Gammaproteobacteria bacterium	FALSE	FFLLSSSSYY**CC*WLLLLPPPPHHQQRRRRIIIMTTTTNNKKSSRRVVVVAAAADDEEGGGG	FFLLSSSSYY??CC?WLLLLPPPPHHQQRRRRIIIMTTTTNNKKSSRKVVVVAAAADDEEGGGG	1	AGG	R	K	274	190275	Missing	No tRNA(CCU) or tRNA(UCU)				0.65
GCA_011322905.1-AGG	1913989	B	GCA_011322905.1	Gammaproteobacteria bacterium	FALSE	FFLLSSSSYY**CC*WLLLLPPPPHHQQRRRRIIIMTTTTNNKKSSRRVVVVAAAADDEEGGGG	FFLLSSSSYY??CC?WLLLLPPPPHHQQRRRRIIIMTTTTNNKKSSRKVVVVAAAADDEEGGGG	1	AGG	R	K	129	116395	Missing	No tRNA(CCU) or tRNA(UCU)				0.63
GCA_011371455.1-AGG	1913989	B	GCA_011371455.1	Gammaproteobacteria bacterium	FALSE	FFLLSSSSYY**CC*WLLLLPPPPHHQQRRRRIIIMTTTTNNKKSSRRVVVVAAAADDEEGGGG	FFLLSSSSYY??CC?WLLLLPPPPHHQQRRRRIIIMTTTTNNKKSSRKVVVVAAAADDEEGGGG	1	AGG	R	K	485	249060	No	No tRNA(CCU), Arg-type tRNA(UCU)				0.64
GCA_011374845.1-AGG	1913989	B	GCA_011374845.1	Gammaproteobacteria bacterium	FALSE	FFLLSSSSYY**CC*WLLLLPPPPHHQQRRRRIIIMTTTTNNKKSSRRVVVVAAAADDEEGGGG	FF?LSSSSYY??CC?WLLLLPPPPHHQQRRRRIIIMTTTTNNKKSSRKVVVVAAAADDEEGGGG	1	AGG	R	K	204	255303	Missing	No tRNA(CCU) or tRNA(UCU)				0.69
GCA_012510865.1-AGG	1913989	B	GCA_012510865.1	Gammaproteobacteria bacterium	FALSE	FFLLSSSSYY**CC*WLLLLPPPPHHQQRRRRIIIMTTTTNNKKSSRRVVVVAAAADDEEGGGG	FF?LSSSSYY??CC?WLLLLPPPPHHQQRRRRIIIMTTTTNNKKSS?KVVVVAAAADDEEGGGG	1	AGG	R	K	792	312913	No	tRNA(CCU) appears to be arginine-type due to A20				0.72
GCA_002796975.1-AGG	1917215	B	GCA_002796975.1	Ferrovibrio sp.	TRUE	FFLLSSSSYY**CC*WLLLLPPPPHHQQRRRRIIIMTTTTNNKKSSRRVVVVAAAADDEEGGGG	FFLLSSSSYY??CC?WLLLLPPPPHHQQRRRRIIIMTTTTNNKKSSRKVVVVAAAADDEEGGGG	1	AGG	R	K	728	473357	No	tRNA(CCU) appears to be arginine-type due to A20				0.63
GCA_003022655.1-AGG	1919089	B	GCA_003022655.1	Bacteroidetes bacterium QH_1_64_81	TRUE	FFLLSSSSYY**CC*WLLLLPPPPHHQQRRRRIIIMTTTTNNKKSSRRVVVVAAAADDEEGGGG	FFLLSSSSYY??CC?WLLLLPPPPHHQQRRRRIIIMTTTTNNKKSSRKVVVVAAAADDEEGGGG	1	AGG	R	K	161	203248	No	tRNA(CCU) appears to be arginine-type due to A20				0.64
GCA_003023105.1-AGG	1919091	B	GCA_003023105.1	Bacteroidetes bacterium QH_10_64_37	TRUE	FFLLSSSSYY**CC*WLLLLPPPPHHQQRRRRIIIMTTTTNNKKSSRRVVVVAAAADDEEGGGG	FFLLSSSSYY??CC?WLLLLPPPPHHQQRRRRIIIMTTTTNNKKSSRKVVVVAAAADDEEGGGG	1	AGG	R	K	136	132640	No	tRNA(CCU) appears to be arginine-type due to A20				0.64
GCA_003022645.1-AGG	1919092	B	GCA_003022645.1	Bacteroidetes bacterium QH_2_63_10	TRUE	FFLLSSSSYY**CC*WLLLLPPPPHHQQRRRRIIIMTTTTNNKKSSRRVVVVAAAADDEEGGGG	FFLLSSSSYY??CC?WLLLLPPPPHHQQRRRRIIIMTTTTNNKKSS?KVVVVAAAADDEEGGGG	1	AGG	R	K	207	218882	Missing	No tRNA(CCU) or tRNA(UCU)				0.64
GCA_003023045.1-AGG	1919099	B	GCA_003023045.1	Bacteroidetes bacterium QH_7_64_110	TRUE	FFLLSSSSYY**CC*WLLLLPPPPHHQQRRRRIIIMTTTTNNKKSSRRVVVVAAAADDEEGGGG	FFLLSSSSYY??CC?WLLLLPPPPHHQQRRRRII?MTTTTNNKKSS?KVVVVAAAADDEEGGGG	1	AGG	R	K	53	64421	Missing	No tRNA(CCU) or tRNA(UCU)				0.63
GCA_003022565.1-AGG	1919105	B	GCA_003022565.1	Bacteroidetes bacterium QS_3_64_15	TRUE	FFLLSSSSYY**CC*WLLLLPPPPHHQQRRRRIIIMTTTTNNKKSSRRVVVVAAAADDEEGGGG	FFLLSSSSYY??CC?WLLLLPPPPHHQQRRRRIIIMTTTTNNKKSSRKVVVVAAAADDEEGGGG	1	AGG	R	K	226	243211	No	tRNA(CCU) appears to be arginine-type due to A20				0.64
GCA_003022485.1-AGG	1919110	B	GCA_003022485.1	Bacteroidetes bacterium QS_8_68_28	TRUE	FFLLSSSSYY**CC*WLLLLPPPPHHQQRRRRIIIMTTTTNNKKSSRRVVVVAAAADDEEGGGG	FFLLSSSSYY??CC?WLLLLPPPPHHQQRRRRIIIMTTTTNNKKSSRKVVVVAAAADDEEGGGG	1	AGG	R	K	134	169864	No	tRNA(CCU) appears to be arginine-type due to A20				0.68
GCA_003022535.1-AGG	1919111	B	GCA_003022535.1	Bacteroidetes bacterium QS_9_68_14	TRUE	FFLLSSSSYY**CC*WLLLLPPPPHHQQRRRRIIIMTTTTNNKKSSRRVVVVAAAADDEEGGGG	FFLLSSSSYY??CC?WLLLLPPPPHHQQRRRRIIIMTTTTNNKKSSRKVVVVAAAADDEEGGGG	1	AGG	R	K	104	159734	No	tRNA(CCU) appears to be arginine-type due to A20				0.68
GCA_003023295.1-AGG	1919114	B	GCA_003023295.1	Bacteroidetes bacterium SW_11_64_17	TRUE	FFLLSSSSYY**CC*WLLLLPPPPHHQQRRRRIIIMTTTTNNKKSSRRVVVVAAAADDEEGGGG	FFLLSSSSYY??CC?WLLLLPPPPHHQQRRRRII?MTTTTNNKKSSRKVVVVAAAADDEEGGGG	1	AGG	R	K	103	146398	No	tRNA(CCU) appears to be arginine-type due to A20				0.64
GCA_003022965.1-AGG	1919116	B	GCA_003022965.1	Bacteroidetes bacterium SW_7_64_58	TRUE	FFLLSSSSYY**CC*WLLLLPPPPHHQQRRRRIIIMTTTTNNKKSSRRVVVVAAAADDEEGGGG	FFLLSSSSYY??CC?WLLLLPPPPHHQQRRRRIIIMTTTTNNKKSSRKVVVVAAAADDEEGGGG	1	AGG	R	K	118	156359	Missing	No tRNA(CCU) or tRNA(UCU)				0.64
GCA_003022465.1-AGG	1919117	B	GCA_003022465.1	Bacteroidetes bacterium SW_8_64_56	TRUE	FFLLSSSSYY**CC*WLLLLPPPPHHQQRRRRIIIMTTTTNNKKSSRRVVVVAAAADDEEGGGG	FFLLSSSSYY??CC?WLLLLPPPPHHQQRRRRIIIMTTTTNNKKSSRKVVVVAAAADDEEGGGG	1	AGG	R	K	126	144039	Missing	No tRNA(CCU) or tRNA(UCU)				0.64
GCA_007571025.1-AGG	1924941	B	GCA_007571025.1	Oceanicaulis sp.	FALSE	FFLLSSSSYY**CC*WLLLLPPPPHHQQRRRRIIIMTTTTNNKKSSRRVVVVAAAADDEEGGGG	FFLLSSSSYY??CC?WLLLLPPPPHHQQRRRRIIIMTTTTNNKKSSRKVVVVAAAADDEEGGGG	1	AGG	R	K	764	170265	No	tRNA(CCU) appears to be arginine-type due to A20				0.58
GCA_007571185.1-AGG	1924941	B	GCA_007571185.1	Oceanicaulis sp.	FALSE	FFLLSSSSYY**CC*WLLLLPPPPHHQQRRRRIIIMTTTTNNKKSSRRVVVVAAAADDEEGGGG	FFLLSSSSYY??CC?WLLLLPPPPHHQQRRRRIIIMTTTTNNKKSSRKVVVVAAAADDEEGGGG	1	AGG	R	K	868	190578	No	tRNA(CCU) appears to be arginine-type due to A20				0.57
GCA_001950415.1-AGG	1926319	B	GCA_001950415.1	Roseomonas sp. TAS13	TRUE	FFLLSSSSYY**CC*WLLLLPPPPHHQQRRRRIIIMTTTTNNKKSSRRVVVVAAAADDEEGGGG	FFLLSSSSYY??CC?WLLLLPPPPHHQQRRRRIIIMTTTTNNKKSSRKVVVVAAAADDEEGGGG	1	AGG	R	K	1086	542990	No	tRNA(CCU) appears to be arginine-type due to A20				0.7
GCA_002995625.1-AGG	1926873	B	GCA_002995625.1	Xanthomonadaceae bacterium	FALSE	FFLLSSSSYY**CC*WLLLLPPPPHHQQRRRRIIIMTTTTNNKKSSRRVVVVAAAADDEEGGGG	FF?LSSSSYY??CC?WLLLLPPPPHHQQRRRRII?MTTTTNNKKSSRKVVVVAAAADDEEGGGG	1	AGG	R	K	528	294211	No	tRNA(CCU) appears to be arginine-type due to A20				0.71
GCA_003505795.1-AGG	1926873	B	GCA_003505795.1	Xanthomonadaceae bacterium	FALSE	FFLLSSSSYY**CC*WLLLLPPPPHHQQRRRRIIIMTTTTNNKKSSRRVVVVAAAADDEEGGGG	FF?LSSSSYY??CC?WLLLLPPPPHHQQRRRRIIIMTTTTNNKKSSRKVVVVAAAADDEEGGGG	1	AGG	R	K	781	377931	No	tRNA(CCU) appears to be arginine-type due to A20				0.69
GCA_004174535.1-AGG	1926873	B	GCA_004174535.1	Xanthomonadaceae bacterium	FALSE	FFLLSSSSYY**CC*WLLLLPPPPHHQQRRRRIIIMTTTTNNKKSSRRVVVVAAAADDEEGGGG	FFLLSSSSYY??CC?WLLLLPPPPHHQQRRRRIIIMTTTTNNKKSS?KVVVVAAAADDEEGGGG	1	AGG	R	K	992	539179	No	tRNA(CCU) appears to be arginine-type due to A20				0.68
GCA_012729915.1-AGG	1926873	B	GCA_012729915.1	Xanthomonadaceae bacterium	FALSE	FFLLSSSSYY**CC*WLLLLPPPPHHQQRRRRIIIMTTTTNNKKSSRRVVVVAAAADDEEGGGG	FF?LSSSSYY??CC?WLLLLPPPPHHQQRRRRII?MTTTTNNKKSS?KVVVVAAAADDEEGGGG	1	AGG	R	K	639	348307	No	tRNA(CCU) appears to be arginine-type due to A20				0.72
GCA_012840695.1-AGG	1926873	B	GCA_012840695.1	Xanthomonadaceae bacterium	FALSE	FFLLSSSSYY**CC*WLLLLPPPPHHQQRRRRIIIMTTTTNNKKSSRRVVVVAAAADDEEGGGG	FFLLSSSSYY??CC?WLLLLPPPPHHQQRRRRIIIMTTTTNNKKSSRKVVVVAAAADDEEGGGG	1	AGG	R	K	938	475775	No	tRNA(CCU) appears to be arginine-type due to A20				0.64
GCA_003343945.1-AGG	1932692	B	GCA_003343945.1	Lentisphaerae bacterium	FALSE	FFLLSSSSYY**CC*WLLLLPPPPHHQQRRRRIIIMTTTTNNKKSSRRVVVVAAAADDEEGGGG	FFLLSSSSYY??CC?WLLLLPPPPHHQQRRRRIIIMTTTTNNKKSS?KVVVVAAAADDEEGGGG	1	AGG	R	K	610	280290	No	tRNA(CCU) appears to be arginine-type due to A20				0.61
GCA_012514035.1-AGG	1932692	B	GCA_012514035.1	Lentisphaerae bacterium	FALSE	FFLLSSSSYY**CC*WLLLLPPPPHHQQRRRRIIIMTTTTNNKKSSRRVVVVAAAADDEEGGGG	FFLLSSSSYY??CC?WLLLLPPPPHHQQRRRRIIIMTTTTNNKKSSRKVVVVAAAADDEEGGGG	1	AGG	R	K	186	227617	No	tRNA(CCU) appears to be arginine-type due to A20				0.64
GCA_012515305.1-AGG	1932692	B	GCA_012515305.1	Lentisphaerae bacterium	FALSE	FFLLSSSSYY**CC*WLLLLPPPPHHQQRRRRIIIMTTTTNNKKSSRRVVVVAAAADDEEGGGG	FFLLSSSSYY??CC?WLLLLPPPPHHQQRRRRIIIMTTTTNNKKSS?KVVVVAAAADDEEGGGG	1	AGG	R	K	241	231502	No	tRNA(CCU) appears to be arginine-type due to A20				0.68
GCA_012521875.1-AGG	1932692	B	GCA_012521875.1	Lentisphaerae bacterium	FALSE	FFLLSSSSYY**CC*WLLLLPPPPHHQQRRRRIIIMTTTTNNKKSSRRVVVVAAAADDEEGGGG	FFLLSSSSYY??CC?WLLLLPPPPHHQQRRRRIIIMTTTTNNKKSSRKVVVVAAAADDEEGGGG	1	AGG	R	K	728	252351	No	tRNA(CCU) appears to be arginine-type due to A20				0.64
GCA_008933495.1-AGG	1934341	B	GCA_008933495.1	Pseudorhodoplanes sp.	TRUE	FFLLSSSSYY**CC*WLLLLPPPPHHQQRRRRIIIMTTTTNNKKSSRRVVVVAAAADDEEGGGG	FFLLSSSSYY??CC?WLLLLPPPPHHQQRRRRIIIMTTTTNNKKSS?KVVVVAAAADDEEGGGG	1	AGG	R	K	943	395978	No	tRNA(CCU) appears to be arginine-type due to A20				0.65
GCA_002012345.1-AGG	1944648	B	GCA_002012345.1	blood disease bacterium A2-HR MARDI	TRUE	FFLLSSSSYY**CC*WLLLLPPPPHHQQRRRRIIIMTTTTNNKKSSRRVVVVAAAADDEEGGGG	FFLLSSSSYY??CC?WLLLLPPPPHHQQRRRRIIIMTTTTNNKKSSRKVVVVAAAADDEEGGGG	1	AGG	R	K	625	489406	No	tRNA(CCU) appears to be arginine-type due to A20				0.66
GCA_003506615.1-AGG	1945593	B	GCA_003506615.1	Oscillibacter sp.	FALSE	FFLLSSSSYY**CC*WLLLLPPPPHHQQRRRRIIIMTTTTNNKKSSRRVVVVAAAADDEEGGGG	FFLLSSSSYY??CC?WLLLLPPPPHHQQRRRRIIIMTTTTNNKKSSRKVVVVAAAADDEEGGGG	1	AGG	R	K	262	171666	Unclear	tRNA(CCU) has a weird D-loop, has A73 discriminator. tRNA(UCU) is arginine-type, has A20				0.62
GCA_003525415.1-AGG	1945593	B	GCA_003525415.1	Oscillibacter sp.	FALSE	FFLLSSSSYY**CC*WLLLLPPPPHHQQRRRRIIIMTTTTNNKKSSRRVVVVAAAADDEEGGGG	FFLLSSSSYY??CC?WLLLLPPPPHHQQRRRRIIIMTTTTNNKKSSRKVVVVAAAADDEEGGGG	1	AGG	R	K	305	193025	Unclear	tRNA(CCU) has a weird D-loop, has A73 discriminator. tRNA(UCU) is arginine-type, has A20				0.61
GCA_003540735.1-AGG	1945593	B	GCA_003540735.1	Oscillibacter sp.	FALSE	FFLLSSSSYY**CC*WLLLLPPPPHHQQRRRRIIIMTTTTNNKKSSRRVVVVAAAADDEEGGGG	FFLLSSSSYY??CC?WLLLLPPPPHHQQRRRRIIIMTTTTNNKKSSRKVVVVAAAADDEEGGGG	1	AGG	R	K	275	178308	Unclear	tRNA(CCU) has a weird D-loop, has A73 discriminator. tRNA(UCU) is arginine-type, has A20				0.61
GCA_002001105.1-AGG	1945854	B	GCA_002001105.1	Rhodanobacter sp. C06	TRUE	FFLLSSSSYY**CC*WLLLLPPPPHHQQRRRRIIIMTTTTNNKKSSRRVVVVAAAADDEEGGGG	FF?LSSSSYY??CC?WLLLLPPPPHHQQRRRRIIIMTTTTNNKKSSRKVVVVAAAADDEEGGGG	1	AGG	R	K	379	405346	No	tRNA(CCU) appears to be arginine-type due to A20				0.68
GCA_002001045.1-AGG	1945856	B	GCA_002001045.1	Rhodanobacter sp. C01	TRUE	FFLLSSSSYY**CC*WLLLLPPPPHHQQRRRRIIIMTTTTNNKKSSRRVVVVAAAADDEEGGGG	FFLLSSSSYY??CC?WLLLLPPPPHHQQRRRRIIIMTTTTNNKKSSRKVVVVAAAADDEEGGGG	1	AGG	R	K	571	416219	No	tRNA(CCU) appears to be arginine-type due to A20				0.63
GCA_002002705.1-AGG	1945857	B	GCA_002002705.1	Polaromonas sp. C04	TRUE	FFLLSSSSYY**CC*WLLLLPPPPHHQQRRRRIIIMTTTTNNKKSSRRVVVVAAAADDEEGGGG	FFLLSSSSYY??CC?WLLLLPPPPHHQQRRRRIIIMTTTTNNKKSSRKVVVVAAAADDEEGGGG	1	AGG	R	K	908	483537	No	tRNA(CCU) appears to be arginine-type due to A20				0.64
GCA_002001085.1-AGG	1945859	B	GCA_002001085.1	Rhodanobacter sp. B05	TRUE	FFLLSSSSYY**CC*WLLLLPPPPHHQQRRRRIIIMTTTTNNKKSSRRVVVVAAAADDEEGGGG	FFLLSSSSYY??CC?WLLLLPPPPHHQQRRRRIIIMTTTTNNKKSS?KVVVVAAAADDEEGGGG	1	AGG	R	K	576	389979	No	tRNA(CCU) appears to be arginine-type due to A20				0.65
GCA_002001125.1-AGG	1945860	B	GCA_002001125.1	Rhodanobacter sp. B04	TRUE	FFLLSSSSYY**CC*WLLLLPPPPHHQQRRRRIIIMTTTTNNKKSSRRVVVVAAAADDEEGGGG	FFLLSSSSYY??CC?WLLLLPPPPHHQQRRRRIIIMTTTTNNKKSSRKVVVVAAAADDEEGGGG	1	AGG	R	K	510	395558	No	tRNA(CCU) appears to be arginine-type due to A20				0.64
GCA_002428825.1-AGG	1946012	B	GCA_002428825.1	Alistipes sp. UBA6068	TRUE	FFLLSSSSYY**CC*WLLLLPPPPHHQQRRRRIIIMTTTTNNKKSSRRVVVVAAAADDEEGGGG	FFLLSSSSYY??CC?WLLLLPPPPHHQQRRRRIIIMTTTTNNKKSSRKVVVVAAAADDEEGGGG	1	AGG	R	K	260	201335	No	tRNA(CCU) appears to be arginine-type due to A20				0.59
GCA_002396545.1-AGG	1946400	B	GCA_002396545.1	Dechloromonas sp. UBA5016	TRUE	FFLLSSSSYY**CC*WLLLLPPPPHHQQRRRRIIIMTTTTNNKKSSRRVVVVAAAADDEEGGGG	FFLLSSSSYY??CC?WLLLLPPPPHHQQRRRRIIIMTTTTNNKKSSRKVVVVAAAADDEEGGGG	1	AGG	R	K	1044	362855	No	tRNA(CCU) appears to be arginine-type due to A20				0.61
GCA_002396525.1-AGG	1946401	B	GCA_002396525.1	Dechloromonas sp. UBA5017	TRUE	FFLLSSSSYY**CC*WLLLLPPPPHHQQRRRRIIIMTTTTNNKKSSRRVVVVAAAADDEEGGGG	FFLLSSSSYY??CC?WLLLLPPPPHHQQRRRRIIIMTTTTNNKKSSRKVVVVAAAADDEEGGGG	1	AGG	R	K	1227	417757	No	tRNA(CCU) appears to be arginine-type due to A20				0.61
GCA_002396725.1-AGG	1946402	B	GCA_002396725.1	Dechloromonas sp. UBA5021	TRUE	FFLLSSSSYY**CC*WLLLLPPPPHHQQRRRRIIIMTTTTNNKKSSRRVVVVAAAADDEEGGGG	FFLLSSSSYY??CC?WLLLLPPPPHHQQRRRRIIIMTTTTNNKKSSRKVVVVAAAADDEEGGGG	1	AGG	R	K	1186	399676	No	tRNA(CCU) appears to be arginine-type due to A20				0.61
GCA_002396465.1-AGG	1946403	B	GCA_002396465.1	Dechloromonas sp. UBA5022	TRUE	FFLLSSSSYY**CC*WLLLLPPPPHHQQRRRRIIIMTTTTNNKKSSRRVVVVAAAADDEEGGGG	FFLLSSSSYY??CC?WLLLLPPPPHHQQRRRRIIIMTTTTNNKKSSRKVVVVAAAADDEEGGGG	1	AGG	R	K	1151	391199	No	tRNA(CCU) appears to be arginine-type due to A20				0.61
GCA_002491225.1-AGG	1946510	B	GCA_002491225.1	Faecalibacterium sp. UBA7177	TRUE	FFLLSSSSYY**CC*WLLLLPPPPHHQQRRRRIIIMTTTTNNKKSSRRVVVVAAAADDEEGGGG	FFLLSSSSYY??CC?WLLLLPPPPHHQQRRRRIIIMTTTTNNKKSSRKVVVVAAAADDEEGGGG	1	AGG	R	K	524	220176	No	tRNA(CCU) appears to be arginine-type due to A20				0.65
GCA_002331565.1-AGG	1946567	B	GCA_002331565.1	Gemmatimonas sp. UBA2094	TRUE	FFLLSSSSYY**CC*WLLLLPPPPHHQQRRRRIIIMTTTTNNKKSSRRVVVVAAAADDEEGGGG	FFLLSSSSYY??CC?WLLLLPPPPHHQQRRRRIIIMTTTTNNKKSS?KVVVVAAAADDEEGGGG	1	AGG	R	K	205	246515	No	tRNA(CCU) appears to be arginine-type due to A20				0.67
GCA_002413455.1-AGG	1947376	B	GCA_002413455.1	Rhodanobacter sp. UBA5168	TRUE	FFLLSSSSYY**CC*WLLLLPPPPHHQQRRRRIIIMTTTTNNKKSSRRVVVVAAAADDEEGGGG	FFLLSSSSYY??CC?WLLLLPPPPHHQQRRRRIIIMTTTTNNKKSS?KVVVVAAAADDEEGGGG	1	AGG	R	K	579	400938	No	tRNA(CCU) appears to be arginine-type due to A20				0.65
GCA_002422455.1-AGG	1947380	B	GCA_002422455.1	Rhodoferax sp. UBA6134	TRUE	FFLLSSSSYY**CC*WLLLLPPPPHHQQRRRRIIIMTTTTNNKKSSRRVVVVAAAADDEEGGGG	FFLLSSSSYY??CC?WLLLLPPPPHHQQRRRRIIIMTTTTNNKKSSRKVVVVAAAADDEEGGGG	1	AGG	R	K	447	231345	No	No tRNA(CCU), Arg-type tRNA(UCU)				0.63
GCA_002428225.1-AGG	1947395	B	GCA_002428225.1	Roseovarius sp. UBA6167	TRUE	FFLLSSSSYY**CC*WLLLLPPPPHHQQRRRRIIIMTTTTNNKKSSRRVVVVAAAADDEEGGGG	FFLLSSSSYY??CC?WLLLLPPPPHHQQRRRRIIIMTTTTNNKKSS?KVVVVAAAADDEEGGGG	1	AGG	R	K	786	240158	No	No tRNA(CCU), Arg-type tRNA(UCU)				0.66
GCA_002480425.1-AGG	1947397	B	GCA_002480425.1	Roseovarius sp. UBA7808	TRUE	FFLLSSSSYY**CC*WLLLLPPPPHHQQRRRRIIIMTTTTNNKKSSRRVVVVAAAADDEEGGGG	FFLLSSSSYY??CC?WLLLLPPPPHHQQRRRRIIIMTTTTNNKKSSRKVVVVAAAADDEEGGGG	1	AGG	R	K	710	309859	No	tRNA(CCU) appears to be arginine-type due to A20				0.68
GCA_002291565.1-AGG	1947453	B	GCA_002291565.1	Salinisphaera sp. UBA1016	TRUE	FFLLSSSSYY**CC*WLLLLPPPPHHQQRRRRIIIMTTTTNNKKSSRRVVVVAAAADDEEGGGG	FFLLSSSSYY??CC?WLLLLPPPPHHQQRRRRIIIMTTTTNNKKSSRKVVVVAAAADDEEGGGG	1	AGG	R	K	225	330401	No	tRNA(CCU) appears to be arginine-type due to A20				0.64
GCA_002322835.1-AGG	1947546	B	GCA_002322835.1	Stenotrophomonas sp. UBA1577	TRUE	FFLLSSSSYY**CC*WLLLLPPPPHHQQRRRRIIIMTTTTNNKKSSRRVVVVAAAADDEEGGGG	FF?LSSSSYY??CC?WLLLLPPPPHHQQRRRRIIIMTTTTNNKKSS?KVVVVAAAADDEEGGGG	1	AGG	R	K	516	362209	No	tRNA(CCU) appears to be arginine-type due to A20				0.7
GCA_002352995.1-AGG	1947547	B	GCA_002352995.1	Stenotrophomonas sp. UBA1867	TRUE	FFLLSSSSYY**CC*WLLLLPPPPHHQQRRRRIIIMTTTTNNKKSSRRVVVVAAAADDEEGGGG	FFLLSSSSYY??CC?WLLLLPPPPHHQQRRRRIIIMTTTTNNKKSSRKVVVVAAAADDEEGGGG	1	AGG	R	K	540	369003	No	tRNA(CCU) appears to be arginine-type due to A20				0.69
GCA_002331405.1-AGG	1947548	B	GCA_002331405.1	Stenotrophomonas sp. UBA2118	TRUE	FFLLSSSSYY**CC*WLLLLPPPPHHQQRRRRIIIMTTTTNNKKSSRRVVVVAAAADDEEGGGG	FF?LSSSSYY??CC?WLLLLPPPPHHQQRRRRIIIMTTTTNNKKSS?KVVVVAAAADDEEGGGG	1	AGG	R	K	523	366762	No	tRNA(CCU) appears to be arginine-type due to A20				0.7
GCA_002331685.1-AGG	1947549	B	GCA_002331685.1	Stenotrophomonas sp. UBA2123	TRUE	FFLLSSSSYY**CC*WLLLLPPPPHHQQRRRRIIIMTTTTNNKKSSRRVVVVAAAADDEEGGGG	FFLLSSSSYY??CC?WLLLLPPPPHHQQRRRRIIIMTTTTNNKKSS?KVVVVAAAADDEEGGGG	1	AGG	R	K	534	367634	No	tRNA(CCU) appears to be arginine-type due to A20				0.7
GCA_002345545.1-AGG	1947551	B	GCA_002345545.1	Stenotrophomonas sp. UBA2302	TRUE	FFLLSSSSYY**CC*WLLLLPPPPHHQQRRRRIIIMTTTTNNKKSSRRVVVVAAAADDEEGGGG	FFLLSSSSYY??CC?WLLLLPPPPHHQQRRRRIIIMTTTTNNKKSS?KVVVVAAAADDEEGGGG	1	AGG	R	K	412	370896	No	tRNA(CCU) appears to be arginine-type due to A20				0.66
GCA_002363375.1-AGG	1947553	B	GCA_002363375.1	Stenotrophomonas sp. UBA3236	TRUE	FFLLSSSSYY**CC*WLLLLPPPPHHQQRRRRIIIMTTTTNNKKSSRRVVVVAAAADDEEGGGG	FF?LSSSSYY??CC?WLLLLPPPPHHQQRRRRIIIMTTTTNNKKSS?KVVVVAAAADDEEGGGG	1	AGG	R	K	515	366094	No	tRNA(CCU) appears to be arginine-type due to A20				0.7
GCA_002362895.1-AGG	1947554	B	GCA_002362895.1	Stenotrophomonas sp. UBA3238	TRUE	FFLLSSSSYY**CC*WLLLLPPPPHHQQRRRRIIIMTTTTNNKKSSRRVVVVAAAADDEEGGGG	FF?LSSSSYY??CC?WLLLLPPPPHHQQRRRRIIIMTTTTNNKKSS?KVVVVAAAADDEEGGGG	1	AGG	R	K	514	358039	No	tRNA(CCU) appears to be arginine-type due to A20				0.7
GCA_002378065.1-AGG	1947555	B	GCA_002378065.1	Stenotrophomonas sp. UBA3473	TRUE	FFLLSSSSYY**CC*WLLLLPPPPHHQQRRRRIIIMTTTTNNKKSSRRVVVVAAAADDEEGGGG	FF?LSSSSYY??CC?WLLLLPPPPHHQQRRRRIIIMTTTTNNKKSS?KVVVVAAAADDEEGGGG	1	AGG	R	K	517	360134	No	No tRNA(CCU), Arg-type tRNA(UCU)				0.7
GCA_002483525.1-AGG	1947560	B	GCA_002483525.1	Stenotrophomonas sp. UBA7651	TRUE	FFLLSSSSYY**CC*WLLLLPPPPHHQQRRRRIIIMTTTTNNKKSSRRVVVVAAAADDEEGGGG	FF?LSSSSYY??CC?WLLLLPPPPHHQQRRRRIIIMTTTTNNKKSS?KVVVVAAAADDEEGGGG	1	AGG	R	K	403	281042	No	tRNA(CCU) appears to be arginine-type due to A20				0.7
GCA_002294385.1-AGG	1947561	B	GCA_002294385.1	Stenotrophomonas sp. UBA878	TRUE	FFLLSSSSYY**CC*WLLLLPPPPHHQQRRRRIIIMTTTTNNKKSSRRVVVVAAAADDEEGGGG	FFLLSSSSYY??CC?WLLLLPPPPHHQQRRRRIIIMTTTTNNKKSS?KVVVVAAAADDEEGGGG	1	AGG	R	K	542	368677	No	tRNA(CCU) appears to be arginine-type due to A20				0.7
GCA_002376325.1-AGG	1948171	B	GCA_002376325.1	Proteobacteria bacterium UBA3588	TRUE	FFLLSSSSYY**CC*WLLLLPPPPHHQQRRRRIIIMTTTTNNKKSSRRVVVVAAAADDEEGGGG	FFLLSSSSYY??CC?WLLLLPPPPHHQQRRRRIIIMTTTTNNKKSSRKVVVVAAAADDEEGGGG	1	AGG	R	K	434	337462	No	No tRNA(CCU), Arg-type tRNA(UCU)				0.63
GCA_002405525.1-AGG	1948178	B	GCA_002405525.1	Proteobacteria bacterium UBA4656	TRUE	FFLLSSSSYY**CC*WLLLLPPPPHHQQRRRRIIIMTTTTNNKKSSRRVVVVAAAADDEEGGGG	FF?LSSSSYY??CC?WLLLLPPPPHHQQRRRRIIIMTTTTNNKKSSRKVVVVAAAADDEEGGGG	1	AGG	R	K	561	350570	No	tRNA(CCU) appears to be arginine-type due to A20				0.71
GCA_002451215.1-AGG	1948202	B	GCA_002451215.1	Proteobacteria bacterium UBA6900	TRUE	FFLLSSSSYY**CC*WLLLLPPPPHHQQRRRRIIIMTTTTNNKKSSRRVVVVAAAADDEEGGGG	FFLLSSSSYY??CC?WLLLLPPPPHHQQRRRRIIIMTTTTNNKKSSRKVVVVAAAADDEEGGGG	1	AGG	R	K	600	310353	No	tRNA(CCU) appears to be arginine-type due to A20				0.62
GCA_002448955.1-AGG	1948203	B	GCA_002448955.1	Proteobacteria bacterium UBA6901	TRUE	FFLLSSSSYY**CC*WLLLLPPPPHHQQRRRRIIIMTTTTNNKKSSRRVVVVAAAADDEEGGGG	FFLLSSSSYY??CC?WLLLLPPPPHHQQRRRRIIIMTTTTNNKKSSRKVVVVAAAADDEEGGGG	1	AGG	R	K	336	292318	No	tRNA(CCU) appears to be arginine-type due to A20				0.6
GCA_002448935.1-AGG	1948204	B	GCA_002448935.1	Proteobacteria bacterium UBA6903	TRUE	FFLLSSSSYY**CC*WLLLLPPPPHHQQRRRRIIIMTTTTNNKKSSRRVVVVAAAADDEEGGGG	FFLLSSSSYY??CC?WLLLLPPPPHHQQRRRRIIIMTTTTNNKKSSRKVVVVAAAADDEEGGGG	1	AGG	R	K	322	289726	No	tRNA(CCU) appears to be arginine-type due to A20				0.6
GCA_002451085.1-AGG	1948205	B	GCA_002451085.1	Proteobacteria bacterium UBA6908	TRUE	FFLLSSSSYY**CC*WLLLLPPPPHHQQRRRRIIIMTTTTNNKKSSRRVVVVAAAADDEEGGGG	FFLLSSSSYY??CC?WLLLLPPPPHHQQRRRRIIIMTTTTNNKKSSRKVVVVAAAADDEEGGGG	1	AGG	R	K	326	288132	No	tRNA(CCU) appears to be arginine-type due to A20				0.6
GCA_002450945.1-AGG	1948209	B	GCA_002450945.1	Proteobacteria bacterium UBA6917	TRUE	FFLLSSSSYY**CC*WLLLLPPPPHHQQRRRRIIIMTTTTNNKKSSRRVVVVAAAADDEEGGGG	FFLLSSSSYY??CC?WLLLLPPPPHHQQRRRRIIIMTTTTNNKKSSRKVVVVAAAADDEEGGGG	1	AGG	R	K	338	287141	No	No tRNA(CCU), Arg-type tRNA(UCU)				0.6
GCA_002321305.1-AGG	1948240	B	GCA_002321305.1	Verrucomicrobia bacterium UBA1629	TRUE	FFLLSSSSYY**CC*WLLLLPPPPHHQQRRRRIIIMTTTTNNKKSSRRVVVVAAAADDEEGGGG	FF?LSSSSYY??CC?WLLLLPPPPHHQQRRRRIIIMTTTTNNKKSSRKVVVVAAAADDEEGGGG	1	AGG	R	K	597	192742	No	tRNA(CCU) appears to be arginine-type due to A20				0.66
GCA_002746955.1-AGG	1948890	B	GCA_002746955.1	Rhodobacterales bacterium	FALSE	FFLLSSSSYY**CC*WLLLLPPPPHHQQRRRRIIIMTTTTNNKKSSRRVVVVAAAADDEEGGGG	FF?LSSSSYY??CC?WLL?LPPPPHHQQRRRRII?MTTTTNNKKSS?KVVVVAAAADDEEGGGG	1	AGG	R	K	42	29849	Missing	No tRNA(CCU) or tRNA(UCU)				0.64
GCA_002332795.1-AGG	1950189	B	GCA_002332795.1	Anaerolineales bacterium UBA2029	TRUE	FFLLSSSSYY**CC*WLLLLPPPPHHQQRRRRIIIMTTTTNNKKSSRRVVVVAAAADDEEGGGG	FFLLSSSSYY??CC?WLLLLPPPPHHQQRRRRIIIMTTTTNNKKSSRKVVVVAAAADDEEGGGG	1	AGG	R	K	470	365951	No	tRNA(CCU) appears to be arginine-type due to A20				0.64
GCA_002380735.1-AGG	1950208	B	GCA_002380735.1	Anaerolineales bacterium UBA4142	TRUE	FFLLSSSSYY**CC*WLLLLPPPPHHQQRRRRIIIMTTTTNNKKSSRRVVVVAAAADDEEGGGG	FFLLSSSSYY??CC?WLLLLPPPPHHQQRRRRIIIMTTTTNNKKSSRKVVVVAAAADDEEGGGG	1	AGG	R	K	295	364860	No	tRNA(CCU) appears to be arginine-type due to A20				0.6
GCA_002317275.1-AGG	1950826	B	GCA_002317275.1	Clostridiales bacterium UBA1707	TRUE	FFLLSSSSYY**CC*WLLLLPPPPHHQQRRRRIIIMTTTTNNKKSSRRVVVVAAAADDEEGGGG	FFLLSSSSYY??CC?WLLLLPPPPHHQQRRRRIIIMTTTTNNKKSSRKVVVVAAAADDEEGGGG	1	AGG	R	K	637	230749	Missing	No tRNA(CCU) or tRNA(UCU)				0.64
GCA_002373655.1-AGG	1950860	B	GCA_002373655.1	Clostridiales bacterium UBA3628	TRUE	FFLLSSSSYY**CC*WLLLLPPPPHHQQRRRRIIIMTTTTNNKKSSRRVVVVAAAADDEEGGGG	FFLLSSSSYY??CC?WLLLLPPPPHHQQRRRRIIIMTTTTNNKKSSRKVVVVAAAADDEEGGGG	1	AGG	R	K	355	133805	No	tRNA(CCU) appears to be arginine-type due to A20				0.62
GCA_002481795.1-AGG	1950935	B	GCA_002481795.1	Clostridiales bacterium UBA7739	TRUE	FFLLSSSSYY**CC*WLLLLPPPPHHQQRRRRIIIMTTTTNNKKSSRRVVVVAAAADDEEGGGG	FFLLSSSSYY??CC?WLLLLPPPPHHQQRRRRIIIMTTTTNNKKSSRKVVVVAAAADDEEGGGG	1	AGG	R	K	154	200050	Missing	No tRNA(CCU) or tRNA(UCU)				0.62
GCA_002352185.1-AGG	1951619	B	GCA_002352185.1	Competibacteraceae bacterium UBA2788	TRUE	FFLLSSSSYY**CC*WLLLLPPPPHHQQRRRRIIIMTTTTNNKKSSRRVVVVAAAADDEEGGGG	FFLLSSSSYY??CC?WLLLLPPPPHHQQRRRRIIIMTTTTNNKKSSRKVVVVAAAADDEEGGGG	1	AGG	R	K	435	377723	No	tRNA(CCU) appears to be arginine-type due to A20				0.61
GCA_002391525.1-AGG	1951621	B	GCA_002391525.1	Competibacteraceae bacterium UBA3908	TRUE	FFLLSSSSYY**CC*WLLLLPPPPHHQQRRRRIIIMTTTTNNKKSSRRVVVVAAAADDEEGGGG	FFLLSSSSYY??CC?WLLLLPPPPHHQQRRRRIIIMTTTTNNKKSSRKVVVVAAAADDEEGGGG	1	AGG	R	K	825	427177	No	tRNA(CCU) appears to be arginine-type due to A20				0.64
GCA_002423245.1-AGG	1952809	B	GCA_002423245.1	Rhodobacteraceae bacterium UBA6141	TRUE	FFLLSSSSYY**CC*WLLLLPPPPHHQQRRRRIIIMTTTTNNKKSSRRVVVVAAAADDEEGGGG	FF?LSSSSYY??CC?WLLLLPPPPHHQQRRRRIIIMTTTTNNKKSSKKVVVVAAAADDEEGGGG	2	AGG	R	K	1130	333561	No	No tRNA(CCU), Arg-type tRNA(UCU)				0.69
GCA_002347285.1-AGG	1952837	B	GCA_002347285.1	Rhodocyclaceae bacterium UBA2250	TRUE	FFLLSSSSYY**CC*WLLLLPPPPHHQQRRRRIIIMTTTTNNKKSSRRVVVVAAAADDEEGGGG	FFLLSSSSYY??CC?WLLLLPPPPHHQQRRRRIIIMTTTTNNKKSSRKVVVVAAAADDEEGGGG	1	AGG	R	K	690	329825	No	tRNA(CCU) appears to be arginine-type due to A20				0.67
GCA_002382165.1-AGG	1952842	B	GCA_002382165.1	Rhodocyclaceae bacterium UBA4043	TRUE	FFLLSSSSYY**CC*WLLLLPPPPHHQQRRRRIIIMTTTTNNKKSSRRVVVVAAAADDEEGGGG	FFLLSSSSYY??CC?WLLLLPPPPHHQQRRRRIIIMTTTTNNKKSS?KVVVVAAAADDEEGGGG	1	AGG	R	K	457	359029	No	tRNA(CCU) appears to be arginine-type due to A20				0.68
GCA_002405995.1-AGG	1952969	B	GCA_002405995.1	Oscillospiraceae bacterium UBA4632	TRUE	FFLLSSSSYY**CC*WLLLLPPPPHHQQRRRRIIIMTTTTNNKKSSRRVVVVAAAADDEEGGGG	FFLLSSSSYY??CC?WLLLLPPPPHHQQRRRRIIIMTTTTNNKKSSRKVVVVAAAADDEEGGGG	1	AGG	R	K	673	188620	No	tRNA(CCU) appears to be arginine-type due to A20				0.62
GCA_002437825.1-AGG	1952970	B	GCA_002437825.1	Oscillospiraceae bacterium UBA6359	TRUE	FFLLSSSSYY**CC*WLLLLPPPPHHQQRRRRIIIMTTTTNNKKSSRRVVVVAAAADDEEGGGG	FFLLSSSSYY??CC?WLLLLPPPPHHQQRRRRIIIMTTTTNNKKSSRKVVVVAAAADDEEGGGG	1	AGG	R	K	303	175123	Missing	No tRNA(CCU) or tRNA(UCU)				0.62
GCA_002437735.1-AGG	1952971	B	GCA_002437735.1	Oscillospiraceae bacterium UBA6370	TRUE	FFLLSSSSYY**CC*WLLLLPPPPHHQQRRRRIIIMTTTTNNKKSSRRVVVVAAAADDEEGGGG	FFLLSSSSYY??CC?WLLLLPPPPHHQQRRRRIIIMTTTTNNKKSSRKVVVVAAAADDEEGGGG	1	AGG	R	K	323	162368	Missing	No tRNA(CCU) or tRNA(UCU)				0.62
GCA_002438575.1-AGG	1952972	B	GCA_002438575.1	Oscillospiraceae bacterium UBA6409	TRUE	FFLLSSSSYY**CC*WLLLLPPPPHHQQRRRRIIIMTTTTNNKKSSRRVVVVAAAADDEEGGGG	FFLLSSSSYY??CC?WLLLLPPPPHHQQRRRRIIIMTTTTNNKKSSRKVVVVAAAADDEEGGGG	1	AGG	R	K	264	161056	Unclear	tRNA(CCU) has a weird D-loop, has A73 discriminator. tRNA(UCU) is arginine-type, has A20				0.62
GCA_002298485.1-AGG	1952973	B	GCA_002298485.1	Oscillospiraceae bacterium UBA757	TRUE	FFLLSSSSYY**CC*WLLLLPPPPHHQQRRRRIIIMTTTTNNKKSSRRVVVVAAAADDEEGGGG	FFLLSSSSYY??CC?WLLLLPPPPHHQQRRRRIIIMTTTTNNKKSSRKVVVVAAAADDEEGGGG	1	AGG	R	K	606	178344	No	tRNA(CCU) appears to be arginine-type due to A20				0.61
GCA_002296425.1-AGG	1952974	B	GCA_002296425.1	Oscillospiraceae bacterium UBA790	TRUE	FFLLSSSSYY**CC*WLLLLPPPPHHQQRRRRIIIMTTTTNNKKSSRRVVVVAAAADDEEGGGG	FFLLSSSSYY??CC?WLLLLPPPPHHQQRRRRIIIMTTTTNNKKSSRKVVVVAAAADDEEGGGG	1	AGG	R	K	358	173820	Missing	No tRNA(CCU) or tRNA(UCU)				0.62
GCA_002298205.1-AGG	1953067	B	GCA_002298205.1	Rhodanobacteraceae bacterium UBA691	TRUE	FFLLSSSSYY**CC*WLLLLPPPPHHQQRRRRIIIMTTTTNNKKSSRRVVVVAAAADDEEGGGG	FF?LSSSSYY??CC?WLLLLPPPPHHQQRRRRIIIMTTTTNNKKSSRKVVVVAAAADDEEGGGG	1	AGG	R	K	490	390415	No	tRNA(CCU) appears to be arginine-type due to A20				0.69
GCA_002297645.1-AGG	1953068	B	GCA_002297645.1	Rhodanobacteraceae bacterium UBA703	TRUE	FFLLSSSSYY**CC*WLLLLPPPPHHQQRRRRIIIMTTTTNNKKSSRRVVVVAAAADDEEGGGG	FFLLSSSSYY??CC?WLLLLPPPPHHQQRRRRIIIMTTTTNNKKSSRKVVVVAAAADDEEGGGG	1	AGG	R	K	502	397771	No	tRNA(CCU) appears to be arginine-type due to A20				0.69
GCA_002007105.1-AGG	1955620	B	GCA_002007105.1	Hymenobacter sp. CRA2	TRUE	FFLLSSSSYY**CC*WLLLLPPPPHHQQRRRRIIIMTTTTNNKKSSRRVVVVAAAADDEEGGGG	FFLLSSSSYY??CC?WLLLLPPPPHHQQRRRRIIIMTTTTNNKKSSRKVVVVAAAADDEEGGGG	1	AGG	R	K	140	433932	No	tRNA(CCU) appears to be arginine-type due to A20				0.63
GCA_009695095.1-AGG	1961806	B	GCA_009695095.1	Lacunisphaera sp.	TRUE	FFLLSSSSYY**CC*WLLLLPPPPHHQQRRRRIIIMTTTTNNKKSSRRVVVVAAAADDEEGGGG	FFLLSSSSYY??CCWWLLLLPPPPHHQQRRRRIIIMTTTTNNKKSSRKVVVVAAAADDEEGGGG	2	AGG	R	K	326	200803	Missing	No tRNA(CCU) or tRNA(UCU)				0.63
GCA_004298465.1-AGG	1969813	B	GCA_004298465.1	Sinobacteraceae bacterium	TRUE	FFLLSSSSYY**CC*WLLLLPPPPHHQQRRRRIIIMTTTTNNKKSSRRVVVVAAAADDEEGGGG	FFLLSSSSYY??CC?WLLLLPPPPHHQQRRRRIIIMTTTTNNKKSSRKVVVVAAAADDEEGGGG	1	AGG	R	K	344	330054	No	tRNA(CCU) appears to be arginine-type due to A20				0.65
GCA_002282775.1-AGG	1970438	B	GCA_002282775.1	Stenotrophomonas sp. 14-69-23	TRUE	FFLLSSSSYY**CC*WLLLLPPPPHHQQRRRRIIIMTTTTNNKKSSRRVVVVAAAADDEEGGGG	FF?LSSSSYY??CC?WLLLLPPPPHHQQRRRRIIIMTTTTNNKKSSRKVVVVAAAADDEEGGGG	1	AGG	R	K	550	333655	No	tRNA(CCU) appears to be arginine-type due to A20				0.69
GCA_002255295.1-AGG	1970514	B	GCA_002255295.1	Gemmatimonadetes bacterium 21-71-4	TRUE	FFLLSSSSYY**CC*WLLLLPPPPHHQQRRRRIIIMTTTTNNKKSSRRVVVVAAAADDEEGGGG	FFLLSSSSYY??CC?WLLLLPPPPHHQQRRRRIIIMTTTTNNKKSSRKVVVVAAAADDEEGGGG	1	AGG	R	K	401	265946	Missing	No tRNA(CCU) or tRNA(UCU)				0.7
GCA_002282695.1-AGG	1970612	B	GCA_002282695.1	Xanthomonadales bacterium 14-68-21	TRUE	FFLLSSSSYY**CC*WLLLLPPPPHHQQRRRRIIIMTTTTNNKKSSRRVVVVAAAADDEEGGGG	FFLLSSSSYY??CC?WLLLLPPPPHHQQRRRRIIIMTTTTNNKKSSRKVVVVAAAADDEEGGGG	1	AGG	R	K	608	456850	No	tRNA(CCU) appears to be arginine-type due to A20				0.68
GCA_002279065.1-AGG	1970613	B	GCA_002279065.1	Xanthomonadales bacterium 15-68-25	TRUE	FFLLSSSSYY**CC*WLLLLPPPPHHQQRRRRIIIMTTTTNNKKSSRRVVVVAAAADDEEGGGG	FFLLSSSSYY??CC?WLLLLPPPPHHQQRRRRIIIMTTTTNNKKSSRKVVVVAAAADDEEGGGG	1	AGG	R	K	474	383465	No	tRNA(CCU) appears to be arginine-type due to A20				0.68
GCA_008015215.1-AGG	1971895	B	GCA_008015215.1	Thermomonas sp.	TRUE	FFLLSSSSYY**CC*WLLLLPPPPHHQQRRRRIIIMTTTTNNKKSSRRVVVVAAAADDEEGGGG	FF?LSSSSYY??CC?WLLLLPPPPHHQQRRRRIIIMTTTTNNKKSS?KVVVVAAAADDEEGGGG	1	AGG	R	K	179	140793	No	tRNA(CCU) appears to be arginine-type due to A20				0.67
GCA_004001245.1-AGG	1972068	B	GCA_004001245.1	Sulfurivermis fontis	TRUE	FFLLSSSSYY**CC*WLLLLPPPPHHQQRRRRIIIMTTTTNNKKSSRRVVVVAAAADDEEGGGG	FFLLSSSSYY??CC?WLLLLPPPPHHQQRRRRIIIMTTTTNNKKSSRKVVVVAAAADDEEGGGG	1	AGG	R	K	427	374205	No	tRNA(CCU) appears to be arginine-type due to A20				0.64
GCA_002791095.1-AGG	1974089	B	GCA_002791095.1	Rhodocyclales bacterium CG_4_9_14_3_um_filter_68_10	TRUE	FFLLSSSSYY**CC*WLLLLPPPPHHQQRRRRIIIMTTTTNNKKSSRRVVVVAAAADDEEGGGG	FFLLSSSSYY??CC?WLLLLPPPPHHQQRRRRIIIMTTTTNNKKSSRKVVVVAAAADDEEGGGG	1	AGG	R	K	1381	368910	No	tRNA(CCU) appears to be arginine-type due to A20				0.68
GCA_008363175.1-AGG	1977087	B	GCA_008363175.1	Proteobacteria bacterium	FALSE	FFLLSSSSYY**CC*WLLLLPPPPHHQQRRRRIIIMTTTTNNKKSSRRVVVVAAAADDEEGGGG	FFLLSSSSYY??CC?WLLLLPPPPHHQQRRRRIIIMTTTTNNKKSSRKVVVVAAAADDEEGGGG	1	AGG	R	K	818	259501	No	tRNA(CCU) appears to be arginine-type due to A20				0.68
GCA_011056945.1-AGG	1978231	B	GCA_011056945.1	Acidobacteria bacterium	FALSE	FFLLSSSSYY**CC*WLLLLPPPPHHQQRRRRIIIMTTTTNNKKSSRRVVVVAAAADDEEGGGG	FFLLSSSSYY??CC?WLLLLPPPPHHQQRRRRIIIMTTTTNNKKSS?KVVVVAAAADDEEGGGG	1	AGG	R	K	393	199257	Missing	No tRNA(CCU) or tRNA(UCU)				0.64
GCA_012521815.1-AGG	1978231	B	GCA_012521815.1	Acidobacteria bacterium	FALSE	FFLLSSSSYY**CC*WLLLLPPPPHHQQRRRRIIIMTTTTNNKKSSRRVVVVAAAADDEEGGGG	FF?LSSSSYY??CC?WLL?LPPPPHHQQRRRRII?MTTTTNNKKSSRKVVVVAAAADDEEGGGG	1	AGG	R	K	241	279569	No	tRNA(CCU) appears to be arginine-type due to A20				0.73
GCA_005773185.1-AGG	1978525	B	GCA_005773185.1	Sphingomonadales bacterium	FALSE	FFLLSSSSYY**CC*WLLLLPPPPHHQQRRRRIIIMTTTTNNKKSSRRVVVVAAAADDEEGGGG	FF?LSSSSYY??CC?WLLLLPPPPHHQQRRRRII?MTTTTNNKKSSRKVVVVAAAADDEEGGGG	1	AGG	R	K	158	189156	No	No tRNA(CCU), Arg-type tRNA(UCU)				0.71
GCA_002127225.1-AGG	1985172	B	GCA_002127225.1	Sphingomonas sp. IBVSS2	TRUE	FFLLSSSSYY**CC*WLLLLPPPPHHQQRRRRIIIMTTTTNNKKSSRRVVVVAAAADDEEGGGG	FFLLSSSSYY??CC?WLLLLPPPPHHQQRRRRIIIMTTTTNNKKSS?KVVVVAAAADDEEGGGG	1	AGG	R	K	780	388784	No	tRNA(CCU) appears to be arginine-type due to A20				0.68
GCA_002192255.1-AGG	2005046	B	GCA_002192255.1	Stenotrophomonas sp. WZN-1	TRUE	FFLLSSSSYY**CC*WLLLLPPPPHHQQRRRRIIIMTTTTNNKKSSRRVVVVAAAADDEEGGGG	FFLLSSSSYY??CC?WLLLLPPPPHHQQRRRRIIIMTTTTNNKKSSKKVVVVAAAADDEEGGGG	2	AGG	R	K	284	446229	No	tRNA(CCU) appears to be arginine-type due to A20				0.67
GCA_002354895.1-AGG	2005884	B	GCA_002354895.1	Thauera sp. K11	TRUE	FFLLSSSSYY**CC*WLLLLPPPPHHQQRRRRIIIMTTTTNNKKSSRRVVVVAAAADDEEGGGG	FFLLSSSSYY??CC?WLLLLPPPPHHQQRRRRIIIMTTTTNNKKSSRKVVVVAAAADDEEGGGG	1	AGG	R	K	1411	493166	No	tRNA(CCU) appears to be arginine-type due to A20				0.68
GCA_005801555.1-AGG	2006848	B	GCA_005801555.1	Opitutaceae bacterium	FALSE	FFLLSSSSYY**CC*WLLLLPPPPHHQQRRRRIIIMTTTTNNKKSSRRVVVVAAAADDEEGGGG	FF?LSSSSYY??CC?WLLLLPPPPHHQQRRRRII?MTTTTNNKKSS?KVVVVAAAADDEEGGGG	1	AGG	R	K	27	44366	No	No tRNA(CCU), Arg-type tRNA(UCU)				0.68
GCA_009695145.1-AGG	2006848	B	GCA_009695145.1	Opitutaceae bacterium	FALSE	FFLLSSSSYY**CC*WLLLLPPPPHHQQRRRRIIIMTTTTNNKKSSRRVVVVAAAADDEEGGGG	FFLLSSSSYY??CC?WLLLLPPPPHHQQRRRRIIIMTTTTNNKKSS?KVVVVAAAADDEEGGGG	1	AGG	R	K	249	173163	Missing	No tRNA(CCU) or tRNA(UCU)				0.64
GCA_002632325.1-AGG	2006849	B	GCA_002632325.1	Xanthomonadales bacterium	FALSE	FFLLSSSSYY**CC*WLLLLPPPPHHQQRRRRIIIMTTTTNNKKSSRRVVVVAAAADDEEGGGG	FF?LSSSSYY??CC?WLLLLPPPPHHQQRRRRIIIMTTTTNNKKSSRKVVVVAAAADDEEGGGG	1	AGG	R	K	258	330369	No	tRNA(CCU) appears to be arginine-type due to A20				0.65
GCA_003962905.1-AGG	2006849	B	GCA_003962905.1	Xanthomonadales bacterium	FALSE	FFLLSSSSYY**CC*WLLLLPPPPHHQQRRRRIIIMTTTTNNKKSSRRVVVVAAAADDEEGGGG	FFLLSSSSYY??CC?WLLLLPPPPHHQQRRRRIIIMTTTTNNKKSSKKVVVVAAAADDEEGGGG	2	AGG	R	K	355	352319	No	tRNA(CCU) appears to be arginine-type due to A20				0.7
GCA_002842205.1-AGG	2013715	B	GCA_002842205.1	Betaproteobacteria bacterium HGW-Betaproteobacteria-3	TRUE	FFLLSSSSYY**CC*WLLLLPPPPHHQQRRRRIIIMTTTTNNKKSSRRVVVVAAAADDEEGGGG	FFLLSSSSYY??CC?WLLLLPPPPHHQQRRRRIIIMTTTTNNKKSSRKVVVVAAAADDEEGGGG	1	AGG	R	K	408	422002	No	tRNA(CCU) appears to be arginine-type due to A20				0.65
GCA_002216225.1-AGG	2014535	B	GCA_002216225.1	Pandoraea sp. CB10b_02	TRUE	FFLLSSSSYY**CC*WLLLLPPPPHHQQRRRRIIIMTTTTNNKKSSRRVVVVAAAADDEEGGGG	FFLLSSSSYY??CC?WLLLLPPPPHHQQRRRRIIIMTTTTNNKKSSRKVVVVAAAADDEEGGGG	1	AGG	R	K	634	512772	No	tRNA(CCU) appears to be arginine-type due to A20				0.66
GCA_010983895.1-AGG	2016596	B	GCA_010983895.1	Azoarcus sp. M9-3-2	TRUE	FFLLSSSSYY**CC*WLLLLPPPPHHQQRRRRIIIMTTTTNNKKSSRRVVVVAAAADDEEGGGG	FFLLSSSSYY??CC?WLLLLPPPPHHQQRRRRIIIMTTTTNNKKSSRKVVVVAAAADDEEGGGG	1	AGG	R	K	322	456011	No	tRNA(CCU) appears to be arginine-type due to A20				0.67
GCA_002754815.1-AGG	2018065	B	GCA_002754815.1	Roseomonas sp. FDAARGOS_362	TRUE	FFLLSSSSYY**CC*WLLLLPPPPHHQQRRRRIIIMTTTTNNKKSSRRVVVVAAAADDEEGGGG	FFLLSSSSYY??CC?WLLLLPPPPHHQQRRRRIIIMTTTTNNKKSSRKVVVVAAAADDEEGGGG	1	AGG	R	K	830	443160	No	tRNA(CCU) appears to be arginine-type due to A20				0.7
GCA_004297465.1-AGG	2021379	B	GCA_004297465.1	Xanthobacteraceae bacterium	FALSE	FFLLSSSSYY**CC*WLLLLPPPPHHQQRRRRIIIMTTTTNNKKSSRRVVVVAAAADDEEGGGG	FFLLSSSSYY??CC?WLLLLPPPPHHQQRRRRIIIMTTTTNNKKSSRKVVVVAAAADDEEGGGG	1	AGG	R	K	733	323168	No	tRNA(CCU) appears to be arginine-type due to A20				0.66
GCA_002285795.1-AGG	2024580	B	GCA_002285795.1	Plantactinospora sp. KBS50	TRUE	FFLLSSSSYY**CC*WLLLLPPPPHHQQRRRRIIIMTTTTNNKKSSRRVVVVAAAADDEEGGGG	FFLLSSSSYY??CC?WLLLLPPPPHHQQRRRRIIIMTTTTNNKKSSRKVVVVAAAADDEEGGGG	1	AGG	R	K	542	480956	No	tRNA(CCU) appears to be arginine-type due to A20				0.73
GCA_009691645.1-AGG	2024890	B	GCA_009691645.1	Pedosphaera sp.	FALSE	FFLLSSSSYY**CC*WLLLLPPPPHHQQRRRRIIIMTTTTNNKKSSRRVVVVAAAADDEEGGGG	FFLLSSSSYY??CC?WLLLLPPPPHHQQRRRRIIIMTTTTNNKKSSRKVVVVAAAADDEEGGGG	1	AGG	R	K	134	160400	Missing	No tRNA(CCU) or tRNA(UCU)				0.62
GCA_009695285.1-AGG	2024890	B	GCA_009695285.1	Pedosphaera sp.	FALSE	FFLLSSSSYY**CC*WLLLLPPPPHHQQRRRRIIIMTTTTNNKKSSRRVVVVAAAADDEEGGGG	FFLLSSSSYY??CC?WLLLLPPPPHHQQRRRRIIIMTTTTNNKKSSRKVVVVAAAADDEEGGGG	1	AGG	R	K	143	189488	Missing	No tRNA(CCU) or tRNA(UCU)				0.63
GCA_003451595.1-AGG	2026724	B	GCA_003451595.1	Chloroflexi bacterium	FALSE	FFLLSSSSYY**CC*WLLLLPPPPHHQQRRRRIIIMTTTTNNKKSSRRVVVVAAAADDEEGGGG	FFLLSSSSYY??CC?WLLLLPPPPHHQQRRRRIIIMTTTTNNKKSSRKVVVVAAAADDEEGGGG	1	AGG	R	K	391	484215	No	tRNA(CCU) appears to be arginine-type due to A20				0.61
GCA_003695545.1-AGG	2026724	B	GCA_003695545.1	Chloroflexi bacterium	FALSE	FFLLSSSSYY**CC*WLLLLPPPPHHQQRRRRIIIMTTTTNNKKSSRRVVVVAAAADDEEGGGG	FFLLSSSSYY??CC?WLLLLPPPPHHQQRRRRIIIMTTTTNNKKSSRKVVVVAAAADDEEGGGG	1	AGG	R	K	598	380999	No	tRNA(CCU) appears to be arginine-type due to A20				0.66
GCA_003696945.1-AGG	2026724	B	GCA_003696945.1	Chloroflexi bacterium	FALSE	FFLLSSSSYY**CC*WLLLLPPPPHHQQRRRRIIIMTTTTNNKKSSRRVVVVAAAADDEEGGGG	FFLLSSSSYY??CC?WLLLLPPPPHHQQRRRRIIIMTTTTNNKKSSKKVVVVAAAADDEEGGGG	2	AGG	R	K	387	312086	No	tRNA(CCU) appears to be arginine-type due to A20				0.64
GCA_010092805.1-AGG	2026724	B	GCA_010092805.1	Chloroflexi bacterium	FALSE	FFLLSSSSYY**CC*WLLLLPPPPHHQQRRRRIIIMTTTTNNKKSSRRVVVVAAAADDEEGGGG	FFLLSSSSYY??CC?WLLLLPPPPHHQQRRRRIIIMTTTTNNKKSS?KVVVVAAAADDEEGGGG	1	AGG	R	K	171	382653	No	No tRNA(CCU), Arg-type tRNA(UCU)				0.62
GCA_011047785.1-AGG	2026724	B	GCA_011047785.1	Chloroflexi bacterium	FALSE	FFLLSSSSYY**CC*WLLLLPPPPHHQQRRRRIIIMTTTTNNKKSSRRVVVVAAAADDEEGGGG	FFLLSSSSYY??CC?WLLLLPPPPHHQQRRRRIIIMTTTTNNKKSSRKVVVVAAAADDEEGGGG	1	AGG	R	K	426	320353	No	tRNA(CCU) appears to be arginine-type due to A20				0.65
GCA_011048055.1-AGG	2026724	B	GCA_011048055.1	Chloroflexi bacterium	FALSE	FFLLSSSSYY**CC*WLLLLPPPPHHQQRRRRIIIMTTTTNNKKSSRRVVVVAAAADDEEGGGG	FFLLSSSSYY??CC?WLLLLPPPPHHQQRRRRIIIMTTTTNNKKSS?KVVVVAAAADDEEGGGG	1	AGG	R	K	450	308283	No	tRNA(CCU) appears to be arginine-type due to A20				0.65
GCA_011048075.1-AGG	2026724	B	GCA_011048075.1	Chloroflexi bacterium	FALSE	FFLLSSSSYY**CC*WLLLLPPPPHHQQRRRRIIIMTTTTNNKKSSRRVVVVAAAADDEEGGGG	FFLLSSSSYY??CC?WLLLLPPPPHHQQRRRRIIIMTTTTNNKKSS?KVVVVAAAADDEEGGGG	1	AGG	R	K	297	383264	No	tRNA(CCU) appears to be arginine-type due to A20				0.71
GCA_011048175.1-AGG	2026724	B	GCA_011048175.1	Chloroflexi bacterium	FALSE	FFLLSSSSYY**CC*WLLLLPPPPHHQQRRRRIIIMTTTTNNKKSSRRVVVVAAAADDEEGGGG	FFLLSSSSYY??CC?WLLLLPPPPHHQQRRRRIIIMTTTTNNKKSSKKVVVVAAAADDEEGGGG	2	AGG	R	K	800	346883	No	tRNA(CCU) appears to be arginine-type due to A20				0.64
GCA_011048615.1-AGG	2026724	B	GCA_011048615.1	Chloroflexi bacterium	FALSE	FFLLSSSSYY**CC*WLLLLPPPPHHQQRRRRIIIMTTTTNNKKSSRRVVVVAAAADDEEGGGG	FFLLSSSSYY??CC?WLLLLPPPPHHQQRRRRIIIMTTTTNNKKSSRKVVVVAAAADDEEGGGG	1	AGG	R	K	720	372069	No	tRNA(CCU) appears to be arginine-type due to A20				0.62
GCA_011051245.1-AGG	2026724	B	GCA_011051245.1	Chloroflexi bacterium	FALSE	FFLLSSSSYY**CC*WLLLLPPPPHHQQRRRRIIIMTTTTNNKKSSRRVVVVAAAADDEEGGGG	FFLLSSSSYY??CC?WLLLLPPPPHHQQRRRRIIIMTTTTNNKKSSKKVVVVAAAADDEEGGGG	2	AGG	R	K	739	472290	No	tRNA(CCU) appears to be arginine-type due to A20				0.65
GCA_011051445.1-AGG	2026724	B	GCA_011051445.1	Chloroflexi bacterium	FALSE	FFLLSSSSYY**CC*WLLLLPPPPHHQQRRRRIIIMTTTTNNKKSSRRVVVVAAAADDEEGGGG	FFLLSSSSYY??CC?WLLLLPPPPHHQQRRRRIIIMTTTTNNKKSS?KVVVVAAAADDEEGGGG	1	AGG	R	K	206	347325	No	tRNA(CCU) appears to be arginine-type due to A20				0.7
GCA_011051745.1-AGG	2026724	B	GCA_011051745.1	Chloroflexi bacterium	FALSE	FFLLSSSSYY**CC*WLLLLPPPPHHQQRRRRIIIMTTTTNNKKSSRRVVVVAAAADDEEGGGG	FFLLSSSSYY??CC?WLLLLPPPPHHQQRRRRIIIMTTTTNNKKSSRKVVVVAAAADDEEGGGG	1	AGG	R	K	1273	339945	No	tRNA(CCU) appears to be arginine-type due to A20				0.63
GCA_011052755.1-AGG	2026724	B	GCA_011052755.1	Chloroflexi bacterium	FALSE	FFLLSSSSYY**CC*WLLLLPPPPHHQQRRRRIIIMTTTTNNKKSSRRVVVVAAAADDEEGGGG	FFLLSSSSYY??CC?WLLLLPPPPHHQQRRRRIIIMTTTTNNKKSSRKVVVVAAAADDEEGGGG	1	AGG	R	K	733	185235	No	tRNA(CCU) appears to be arginine-type due to A20				0.63
GCA_011053895.1-AGG	2026724	B	GCA_011053895.1	Chloroflexi bacterium	FALSE	FFLLSSSSYY**CC*WLLLLPPPPHHQQRRRRIIIMTTTTNNKKSSRRVVVVAAAADDEEGGGG	FFLLSSSSYY??CC?WLLLLPPPPHHQQRRRRIIIMTTTTNNKKSSRKVVVVAAAADDEEGGGG	1	AGG	R	K	423	314725	No	tRNA(CCU) appears to be arginine-type due to A20				0.65
GCA_011053965.1-AGG	2026724	B	GCA_011053965.1	Chloroflexi bacterium	FALSE	FFLLSSSSYY**CC*WLLLLPPPPHHQQRRRRIIIMTTTTNNKKSSRRVVVVAAAADDEEGGGG	FFLLSSSSYY??CC?WLLLLPPPPHHQQRRRRIIIMTTTTNNKKSSKKVVVVAAAADDEEGGGG	2	AGG	R	K	692	442534	No	tRNA(CCU) appears to be arginine-type due to A20				0.65
GCA_011054785.1-AGG	2026724	B	GCA_011054785.1	Chloroflexi bacterium	FALSE	FFLLSSSSYY**CC*WLLLLPPPPHHQQRRRRIIIMTTTTNNKKSSRRVVVVAAAADDEEGGGG	FFLLSSSSYY??CC?WLLLLPPPPHHQQRRRRIIIMTTTTNNKKSSKKVVVVAAAADDEEGGGG	2	AGG	R	K	844	356277	No	tRNA(CCU) appears to be arginine-type due to A20				0.64
GCA_011055045.1-AGG	2026724	B	GCA_011055045.1	Chloroflexi bacterium	FALSE	FFLLSSSSYY**CC*WLLLLPPPPHHQQRRRRIIIMTTTTNNKKSSRRVVVVAAAADDEEGGGG	FFLLSSSSYY??CC?WLLLLPPPPHHQQRRRRIIIMTTTTNNKKSSKKVVVVAAAADDEEGGGG	2	AGG	R	K	613	266947	No	No tRNA(CCU), Arg-type tRNA(UCU)				0.64
GCA_011055185.1-AGG	2026724	B	GCA_011055185.1	Chloroflexi bacterium	FALSE	FFLLSSSSYY**CC*WLLLLPPPPHHQQRRRRIIIMTTTTNNKKSSRRVVVVAAAADDEEGGGG	FFLLSSSSYY??CC?WLLLLPPPPHHQQRRRRIIIMTTTTNNKKSSKKVVVVAAAADDEEGGGG	2	AGG	R	K	703	444554	No	tRNA(CCU) appears to be arginine-type due to A20				0.65
GCA_011055825.1-AGG	2026724	B	GCA_011055825.1	Chloroflexi bacterium	FALSE	FFLLSSSSYY**CC*WLLLLPPPPHHQQRRRRIIIMTTTTNNKKSSRRVVVVAAAADDEEGGGG	FFLLSSSSYY??CC?WLLLLPPPPHHQQRRRRIIIMTTTTNNKKSS?KVVVVAAAADDEEGGGG	1	AGG	R	K	453	311417	No	tRNA(CCU) appears to be arginine-type due to A20				0.65
GCA_011056155.1-AGG	2026724	B	GCA_011056155.1	Chloroflexi bacterium	FALSE	FFLLSSSSYY**CC*WLLLLPPPPHHQQRRRRIIIMTTTTNNKKSSRRVVVVAAAADDEEGGGG	FFLLSSSSYY??CC?WLLLLPPPPHHQQRRRRIIIMTTTTNNKKSSRKVVVVAAAADDEEGGGG	1	AGG	R	K	447	325430	No	tRNA(CCU) appears to be arginine-type due to A20				0.65
GCA_011056385.1-AGG	2026724	B	GCA_011056385.1	Chloroflexi bacterium	FALSE	FFLLSSSSYY**CC*WLLLLPPPPHHQQRRRRIIIMTTTTNNKKSSRRVVVVAAAADDEEGGGG	FFLLSSSSYY??CC?WLLLLPPPPHHQQRRRRIIIMTTTTNNKKSS?KVVVVAAAADDEEGGGG	1	AGG	R	K	449	313473	No	tRNA(CCU) appears to be arginine-type due to A20				0.65
GCA_011057075.1-AGG	2026724	B	GCA_011057075.1	Chloroflexi bacterium	FALSE	FFLLSSSSYY**CC*WLLLLPPPPHHQQRRRRIIIMTTTTNNKKSSRRVVVVAAAADDEEGGGG	FFLLSSSSYY??CC?WLLLLPPPPHHQQRRRRIIIMTTTTNNKKSS?KVVVVAAAADDEEGGGG	1	AGG	R	K	461	318649	No	tRNA(CCU) appears to be arginine-type due to A20				0.65
GCA_011057325.1-AGG	2026724	B	GCA_011057325.1	Chloroflexi bacterium	FALSE	FFLLSSSSYY**CC*WLLLLPPPPHHQQRRRRIIIMTTTTNNKKSSRRVVVVAAAADDEEGGGG	FFLLSSSSYY??CC?WLLLLPPPPHHQQRRRRIIIMTTTTNNKKSS?KVVVVAAAADDEEGGGG	1	AGG	R	K	264	342202	No	tRNA(CCU) appears to be arginine-type due to A20				0.7
GCA_011057365.1-AGG	2026724	B	GCA_011057365.1	Chloroflexi bacterium	FALSE	FFLLSSSSYY**CC*WLLLLPPPPHHQQRRRRIIIMTTTTNNKKSSRRVVVVAAAADDEEGGGG	FFLLSSSSYY??CC?WLLLLPPPPHHQQRRRRIIIMTTTTNNKKSSKKVVVVAAAADDEEGGGG	2	AGG	R	K	123	167912	No	tRNA(CCU) appears to be arginine-type due to A20				0.69
GCA_011366565.1-AGG	2026724	B	GCA_011366565.1	Chloroflexi bacterium	FALSE	FFLLSSSSYY**CC*WLLLLPPPPHHQQRRRRIIIMTTTTNNKKSSRRVVVVAAAADDEEGGGG	FFLLSSSSYY??CC?WLLLLPPPPHHQQRRRRIIIMTTTTNNKKSS?KVVVVAAAADDEEGGGG	1	AGG	R	K	361	220197	No	tRNA(CCU) appears to be arginine-type due to A20				0.63
GCA_011367385.1-AGG	2026724	B	GCA_011367385.1	Chloroflexi bacterium	FALSE	FFLLSSSSYY**CC*WLLLLPPPPHHQQRRRRIIIMTTTTNNKKSSRRVVVVAAAADDEEGGGG	FFLLSSSSYY??CC?WLLLLPPPPHHQQRRRRIIIMTTTTNNKKSSRKVVVVAAAADDEEGGGG	1	AGG	R	K	496	415661	No	tRNA(CCU) appears to be arginine-type due to A20				0.69
GCA_011369885.1-AGG	2026724	B	GCA_011369885.1	Chloroflexi bacterium	FALSE	FFLLSSSSYY**CC*WLLLLPPPPHHQQRRRRIIIMTTTTNNKKSSRRVVVVAAAADDEEGGGG	FFLLSSSSYY??CC?WLLLLPPPPHHQQRRRRIIIMTTTTNNKKSS?KVVVVAAAADDEEGGGG	1	AGG	R	K	414	265053	No	tRNA(CCU) appears to be arginine-type due to A20				0.63
GCA_011373175.1-AGG	2026724	B	GCA_011373175.1	Chloroflexi bacterium	FALSE	FFLLSSSSYY**CC*WLLLLPPPPHHQQRRRRIIIMTTTTNNKKSSRRVVVVAAAADDEEGGGG	FFLLSSSSYY??CC?WLLLLPPPPHHQQRRRRIIIMTTTTNNKKSS?KVVVVAAAADDEEGGGG	1	AGG	R	K	472	307521	No	tRNA(CCU) appears to be arginine-type due to A20				0.63
GCA_011374585.1-AGG	2026724	B	GCA_011374585.1	Chloroflexi bacterium	FALSE	FFLLSSSSYY**CC*WLLLLPPPPHHQQRRRRIIIMTTTTNNKKSSRRVVVVAAAADDEEGGGG	FFLLSSSSYY??CC?WLLLLPPPPHHQQRRRRIIIMTTTTNNKKSS?KVVVVAAAADDEEGGGG	1	AGG	R	K	390	224289	Missing	No tRNA(CCU) or tRNA(UCU)				0.67
GCA_012729765.1-AGG	2026724	B	GCA_012729765.1	Chloroflexi bacterium	FALSE	FFLLSSSSYY**CC*WLLLLPPPPHHQQRRRRIIIMTTTTNNKKSSRRVVVVAAAADDEEGGGG	FFLLSSSSYY??CC?WLLLLPPPPHHQQRRRRIIIMTTTTNNKKSSRKVVVVAAAADDEEGGGG	1	AGG	R	K	310	395325	No	No tRNA(CCU), Arg-type tRNA(UCU)				0.64
GCA_012798275.1-AGG	2026724	B	GCA_012798275.1	Chloroflexi bacterium	FALSE	FFLLSSSSYY**CC*WLLLLPPPPHHQQRRRRIIIMTTTTNNKKSSRRVVVVAAAADDEEGGGG	FFLLSSSSYY??CC?WLLLLPPPPHHQQRRRRIIIMTTTTNNKKSSRKVVVVAAAADDEEGGGG	1	AGG	R	K	312	287409	No	tRNA(CCU) appears to be arginine-type due to A20				0.63
GCA_012840685.1-AGG	2026724	B	GCA_012840685.1	Chloroflexi bacterium	FALSE	FFLLSSSSYY**CC*WLLLLPPPPHHQQRRRRIIIMTTTTNNKKSSRRVVVVAAAADDEEGGGG	FFLLSSSSYY??CC?WLLLLPPPPHHQQRRRRIIIMTTTTNNKKSSRKVVVVAAAADDEEGGGG	1	AGG	R	K	425	514201	No	tRNA(CCU) appears to be arginine-type due to A20				0.61
GCA_902812335.1-AGG	2026724	B	GCA_902812335.1	Chloroflexi bacterium	FALSE	FFLLSSSSYY**CC*WLLLLPPPPHHQQRRRRIIIMTTTTNNKKSSRRVVVVAAAADDEEGGGG	FFLLSSSSYY??CC?WLLLLPPPPHHQQRRRRIIIMTTTTNNKKSSRKVVVVAAAADDEEGGGG	1	AGG	R	K	899	366506	No	tRNA(CCU) appears to be arginine-type due to A20				0.63
GCA_011380585.1-AGG	2026725	B	GCA_011380585.1	Chromatiales bacterium	FALSE	FFLLSSSSYY**CC*WLLLLPPPPHHQQRRRRIIIMTTTTNNKKSSRRVVVVAAAADDEEGGGG	FF?LSSSSYY??CC?WLLLLPPPPHHQQRRRRIIIMTTTTNNKKSSRKVVVVAAAADDEEGGGG	1	AGG	R	K	385	296774	No	tRNA(CCU) appears to be arginine-type due to A20				0.75
GCA_012962235.1-AGG	2026725	B	GCA_012962235.1	Chromatiales bacterium	FALSE	FFLLSSSSYY**CC*WLLLLPPPPHHQQRRRRIIIMTTTTNNKKSSRRVVVVAAAADDEEGGGG	FFLLSSSSYY??CC?WLLLLPPPPHHQQRRRRIIIMTTTTNNKKSSRKVVVVAAAADDEEGGGG	1	AGG	R	K	694	238193	No	tRNA(CCU) appears to be arginine-type due to A20				0.62
GCA_009692705.1-AGG	2026734	B	GCA_009692705.1	Dehalococcoidia bacterium	FALSE	FFLLSSSSYY**CC*WLLLLPPPPHHQQRRRRIIIMTTTTNNKKSSRRVVVVAAAADDEEGGGG	FFLLSSSSYY??CC?WLLLLPPPPHHQQRRRRIIIMTTTTNNKKSS?KVVVVAAAADDEEGGGG	1	AGG	R	K	86	123159	No	No tRNA(CCU), Arg-type tRNA(UCU)				0.73
GCA_011054045.1-AGG	2026734	B	GCA_011054045.1	Dehalococcoidia bacterium	FALSE	FFLLSSSSYY**CC*WLLLLPPPPHHQQRRRRIIIMTTTTNNKKSSRRVVVVAAAADDEEGGGG	FFLLSSSSYY??CC?WLLLLPPPPHHQQRRRRIIIMTTTTNNKKSS?KVVVVAAAADDEEGGGG	1	AGG	R	K	263	349992	No	tRNA(CCU) appears to be arginine-type due to A20				0.7
GCA_003694325.1-AGG	2026735	B	GCA_003694325.1	Deltaproteobacteria bacterium	FALSE	FFLLSSSSYY**CC*WLLLLPPPPHHQQRRRRIIIMTTTTNNKKSSRRVVVVAAAADDEEGGGG	FF?LSSSSYY??CC?WLLLLPPPPHHQQRRRRII?MTTTTNNKKSS?KVVVVAAAADDEEGGGG	1	AGG	R	K	259	325144	No	tRNA(CCU) appears to be arginine-type due to A20				0.72
GCA_005879795.1-AGG	2026735	B	GCA_005879795.1	Deltaproteobacteria bacterium	FALSE	FFLLSSSSYY**CC*WLLLLPPPPHHQQRRRRIIIMTTTTNNKKSSRRVVVVAAAADDEEGGGG	FF?LSSSSYY??CC?WLLLLPPPPHHQQRRRRIIIMTTTTNNKKSS?KVVVVAAAADDEEGGGG	1	AGG	R	K	755	350693	No	tRNA(CCU) appears to be arginine-type due to A20				0.72
GCA_005880095.1-AGG	2026735	B	GCA_005880095.1	Deltaproteobacteria bacterium	FALSE	FFLLSSSSYY**CC*WLLLLPPPPHHQQRRRRIIIMTTTTNNKKSSRRVVVVAAAADDEEGGGG	FFLLSSSSYY??CC?WLLLLPPPPHHQQRRRRIIIMTTTTNNKKSSRKVVVVAAAADDEEGGGG	1	AGG	R	K	434	310685	No	tRNA(CCU) appears to be arginine-type due to A20				0.72
GCA_005887915.1-AGG	2026735	B	GCA_005887915.1	Deltaproteobacteria bacterium	FALSE	FFLLSSSSYY**CC*WLLLLPPPPHHQQRRRRIIIMTTTTNNKKSSRRVVVVAAAADDEEGGGG	FFLLSSSSYY??CC?WLLLLPPPPHHQQRRRRIIIMTTTTNNKKSSRKVVVVAAAADDEEGGGG	1	AGG	R	K	1112	671911	No	No tRNA(CCU), Arg-type tRNA(UCU)				0.7
GCA_011367485.1-AGG	2026735	B	GCA_011367485.1	Deltaproteobacteria bacterium	FALSE	FFLLSSSSYY**CC*WLLLLPPPPHHQQRRRRIIIMTTTTNNKKSSRRVVVVAAAADDEEGGGG	FF?LSSSSYY??CC?WLLLLPPPPHHQQRRRRII?MTTTTNNKKSSRKVVVVAAAADDEEGGGG	1	AGG	R	K	250	280806	No	tRNA(CCU) appears to be arginine-type due to A20				0.73
GCA_003220975.1-AGG	2026742	B	GCA_003220975.1	Gemmatimonadetes bacterium	FALSE	FFLLSSSSYY**CC*WLLLLPPPPHHQQRRRRIIIMTTTTNNKKSSRRVVVVAAAADDEEGGGG	FFLLSSSSYY??CC?WLLLLPPPPHHQQRRRRIIIMTTTTNNKKSS?KVVVVAAAADDEEGGGG	1	AGG	R	K	382	277809	No	tRNA(CCU) appears to be arginine-type due to A20				0.7
GCA_003222055.1-AGG	2026742	B	GCA_003222055.1	Gemmatimonadetes bacterium	FALSE	FFLLSSSSYY**CC*WLLLLPPPPHHQQRRRRIIIMTTTTNNKKSSRRVVVVAAAADDEEGGGG	FFLLSSSSYY??CC?WLLLLPPPPHHQQRRRRIIIMTTTTNNKKSSRKVVVVAAAADDEEGGGG	1	AGG	R	K	478	347897	No	tRNA(CCU) appears to be arginine-type due to A20				0.69
GCA_003222155.1-AGG	2026742	B	GCA_003222155.1	Gemmatimonadetes bacterium	FALSE	FFLLSSSSYY**CC*WLLLLPPPPHHQQRRRRIIIMTTTTNNKKSSRRVVVVAAAADDEEGGGG	FFLLSSSSYY??CC?WLLLLPPPPHHQQRRRRIIIMTTTTNNKKSSRKVVVVAAAADDEEGGGG	1	AGG	R	K	403	332962	No	tRNA(CCU) appears to be arginine-type due to A20				0.7
GCA_011362545.1-AGG	2026742	B	GCA_011362545.1	Gemmatimonadetes bacterium	FALSE	FFLLSSSSYY**CC*WLLLLPPPPHHQQRRRRIIIMTTTTNNKKSSRRVVVVAAAADDEEGGGG	FFLLSSSSYY??CC?WLLLLPPPPHHQQRRRRII?MTTTTNNKKSS?KVVVVAAAADDEEGGGG	1	AGG	R	K	321	265956	No	tRNA(CCU) appears to be arginine-type due to A20				0.74
GCA_005801415.1-AGG	2026763	B	GCA_005801415.1	Myxococcales bacterium	FALSE	FFLLSSSSYY**CC*WLLLLPPPPHHQQRRRRIIIMTTTTNNKKSSRRVVVVAAAADDEEGGGG	FF?LSSSSYY??CC?WLLLLPPPPHHQQRRRRII?MTTTTNNKKSS?KVVVVAAAADDEEGGGG	1	AGG	R	K	185	165830	Missing	No tRNA(CCU) or tRNA(UCU)				0.71
GCA_011526095.1-AGG	2026763	B	GCA_011526095.1	Myxococcales bacterium	FALSE	FFLLSSSSYY**CC*WLLLLPPPPHHQQRRRRIIIMTTTTNNKKSSRRVVVVAAAADDEEGGGG	FF?LSSSSYY??CC?WLLLLPPPPHHQQRRRRII?MTTTTNNKKSSRKVVVVAAAADDEEGGGG	1	AGG	R	K	344	531384	No	tRNA(CCU) appears to be arginine-type due to A20				0.74
GCA_003141355.1-AGG	2026771	B	GCA_003141355.1	Opitutae bacterium	FALSE	FFLLSSSSYY**CC*WLLLLPPPPHHQQRRRRIIIMTTTTNNKKSSRRVVVVAAAADDEEGGGG	FFLLSSSSYY??CC?WLLLLPPPPHHQQRRRRIIIMTTTTNNKKSSRKVVVVAAAADDEEGGGG	1	AGG	R	K	611	340031	No	tRNA(CCU) appears to be arginine-type due to A20				0.64
GCA_003142335.1-AGG	2026771	B	GCA_003142335.1	Opitutae bacterium	FALSE	FFLLSSSSYY**CC*WLLLLPPPPHHQQRRRRIIIMTTTTNNKKSSRRVVVVAAAADDEEGGGG	FFLLSSSSYY??CC?WLLLLPPPPHHQQRRRRIIIMTTTTNNKKSS?KVVVVAAAADDEEGGGG	1	AGG	R	K	519	288259	No	tRNA(CCU) appears to be arginine-type due to A20				0.64
GCA_003142615.1-AGG	2026771	B	GCA_003142615.1	Opitutae bacterium	FALSE	FFLLSSSSYY**CC*WLLLLPPPPHHQQRRRRIIIMTTTTNNKKSSRRVVVVAAAADDEEGGGG	FFLLSSSSYY??CC?WLLLLPPPPHHQQRRRRIIIMTTTTNNKKSSRKVVVVAAAADDEEGGGG	1	AGG	R	K	566	316840	No	tRNA(CCU) appears to be arginine-type due to A20				0.64
GCA_003153035.1-AGG	2026771	B	GCA_003153035.1	Opitutae bacterium	FALSE	FFLLSSSSYY**CC*WLLLLPPPPHHQQRRRRIIIMTTTTNNKKSSRRVVVVAAAADDEEGGGG	FFLLSSSSYY??CC?WLLLLPPPPHHQQRRRRIIIMTTTTNNKKSSRKVVVVAAAADDEEGGGG	1	AGG	R	K	618	335542	No	tRNA(CCU) appears to be arginine-type due to A20				0.64
GCA_003157495.1-AGG	2026771	B	GCA_003157495.1	Opitutae bacterium	FALSE	FFLLSSSSYY**CC*WLLLLPPPPHHQQRRRRIIIMTTTTNNKKSSRRVVVVAAAADDEEGGGG	FFLLSSSSYY??CC?WLLLLPPPPHHQQRRRRIIIMTTTTNNKKSSRKVVVVAAAADDEEGGGG	1	AGG	R	K	658	360077	No	tRNA(CCU) appears to be arginine-type due to A20				0.64
GCA_003160855.1-AGG	2026771	B	GCA_003160855.1	Opitutae bacterium	FALSE	FFLLSSSSYY**CC*WLLLLPPPPHHQQRRRRIIIMTTTTNNKKSSRRVVVVAAAADDEEGGGG	FFLLSSSSYY??CC?WLLLLPPPPHHQQRRRRIIIMTTTTNNKKSSRKVVVVAAAADDEEGGGG	1	AGG	R	K	598	310621	No	tRNA(CCU) appears to be arginine-type due to A20				0.64
GCA_003569245.1-AGG	2026771	B	GCA_003569245.1	Opitutae bacterium	FALSE	FFLLSSSSYY**CC*WLLLLPPPPHHQQRRRRIIIMTTTTNNKKSSRRVVVVAAAADDEEGGGG	FFLLSSSSYY??CC?WLLLLPPPPHHQQRRRRII?MTTTTNNKKSS?KVVVVAAAADDEEGGGG	1	AGG	R	K	114	190834	No	tRNA(CCU) appears to be arginine-type due to A20				0.68
GCA_004558035.1-AGG	2026771	B	GCA_004558035.1	Opitutae bacterium	FALSE	FFLLSSSSYY**CC*WLLLLPPPPHHQQRRRRIIIMTTTTNNKKSSRRVVVVAAAADDEEGGGG	FFLLSSSSYY??CC?WLLLLPPPPHHQQRRRRIIIMTTTTNNKKSSRKVVVVAAAADDEEGGGG	1	AGG	R	K	200	186556	No	tRNA(CCU) appears to be arginine-type due to A20				0.64
GCA_003551485.1-AGG	2026777	B	GCA_003551485.1	Phycisphaeraceae bacterium	FALSE	FFLLSSSSYY**CC*WLLLLPPPPHHQQRRRRIIIMTTTTNNKKSSRRVVVVAAAADDEEGGGG	FFLLSSSSYY??CC?WLLLLPPPPHHQQRRRRIIIMTTTTNNKKSS?KVVVVAAAADDEEGGGG	1	AGG	R	K	620	230133	No	tRNA(CCU) appears to be arginine-type due to A20				0.68
GCA_011054455.1-AGG	2026778	B	GCA_011054455.1	Phycisphaerae bacterium	FALSE	FFLLSSSSYY**CC*WLLLLPPPPHHQQRRRRIIIMTTTTNNKKSSRRVVVVAAAADDEEGGGG	FFLLSSSSYY??CC?WLLLLPPPPHHQQRRRRIIIMTTTTNNKKSS?KVVVVAAAADDEEGGGG	1	AGG	R	K	518	282943	No	No tRNA(CCU), Arg-type tRNA(UCU)				0.69
GCA_004295085.1-AGG	2026780	B	GCA_004295085.1	Planctomycetes bacterium	FALSE	FFLLSSSSYY**CC*WLLLLPPPPHHQQRRRRIIIMTTTTNNKKSSRRVVVVAAAADDEEGGGG	FF?LSSSSYY??CC?WLLLLPPPPHHQQRRRRIIIMTTTTNNKKSSRKVVVVAAAADDEEGGGG	1	AGG	R	K	445	249036	No	tRNA(CCU) appears to be arginine-type due to A20				0.71
[truncated: 5,855 more rows]
