# Supplementary figures and images for: A computational screen for alternative genetic codes in over 250,000 genomes
Source: eLife journal article supplement (doi:10.7554/elife.71402), 2021-11-08

Fraction of  
aligned Pfam  
consensus  
columns

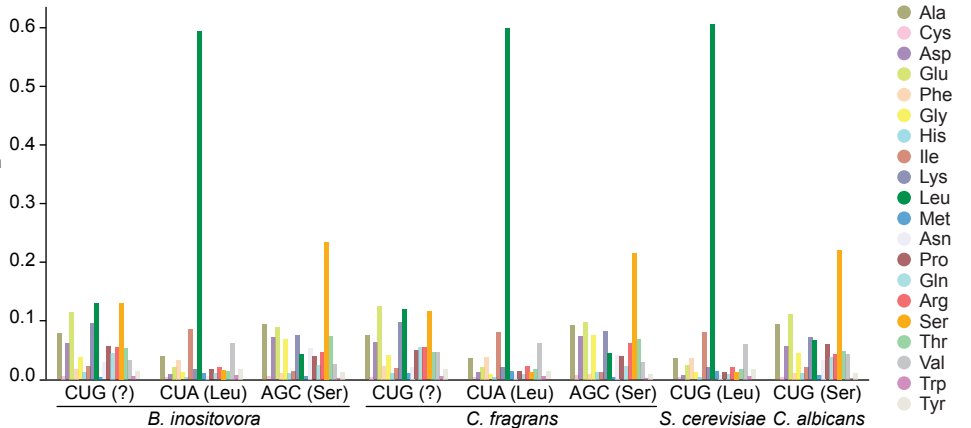

Supplement: supp [file elife-71402-supp-v1.zip]

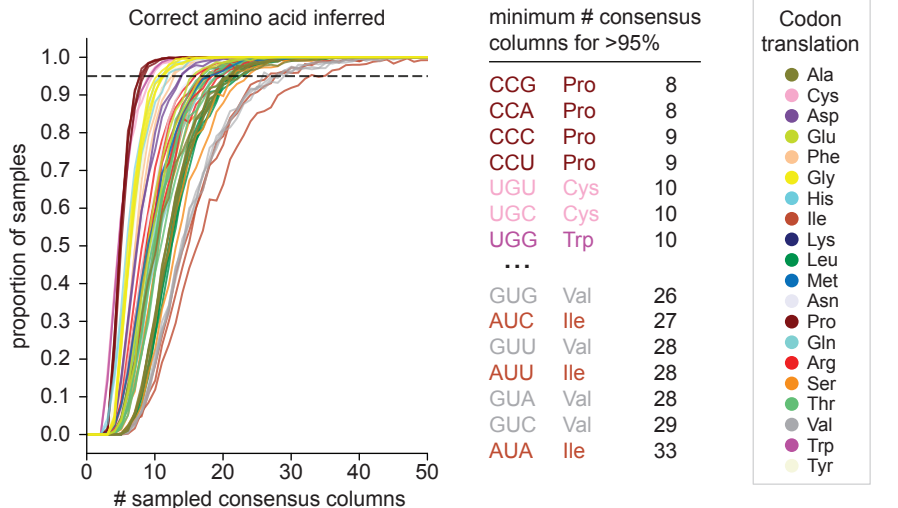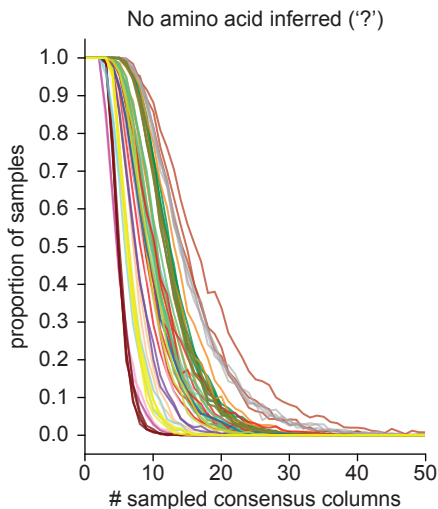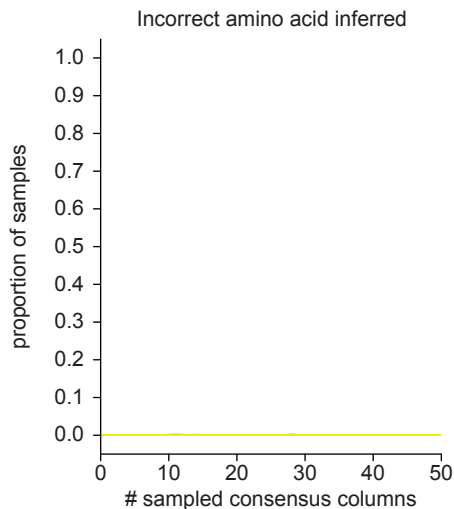

Supplement: supp [file elife-71402-supp-v1.zip]
